# Supplementary material for: Enhanced ORR performance with biomass-derived freestanding catalyst layers: advancing mass transport in gas diffusion electrodes
Source: Royal Society of Chemistry journal article supplement (doi:10.1039/d4ta03864a), 2024-01-01
Supplement: d4ta03864a1.xlsx [file d4ta03864a1.xlsx]

## Sheet: CV data-hierarchical
Compensated Potential	Current	Current density	Compensated Potential	Current	Current density	Compensated Potential	Current	Current density	Compensated Potential	Current	Current density	Compensated Potential	Current	Current density
V	A	A/g	V	A	A/g	V	A	A/g	V	A	A/g	V	A	A/g
vs RHE	5mV/s	5mV/s	vs RHE	10mV/s	10mV/s	vs RHE	20mV/s	20mV/s	vs RHE	50mV/s	50 mV/s	vs RHE	100mV/s	F127PS100 mV/s
1.03973	0.0014	0.12742	1.03669	0.00342	0.31059	1.03973	0.0047	0.42714	1.03973	0.01451	1.31919	1.00965	0.0338	3.07312
1.03958	0.00164	0.1492	1.03683	0.00309	0.28126	1.03958	0.00459	0.4172	1.03958	0.01414	1.2859	1.00986	0.03339	3.03539
1.03943	0.00133	0.12057	1.03675	0.00301	0.27402	1.03943	0.00425	0.38638	1.03943	0.01379	1.25344	1.00991	0.03317	3.01541
1.03928	0.00163	0.14859	1.0364	0.00324	0.29422	1.03928	0.00461	0.41865	1.03928	0.01354	1.23125	1.01001	0.03288	2.98906
1.03912	0.00128	0.11591	1.0362	0.00329	0.29907	1.03912	0.00421	0.38313	1.03912	0.01354	1.23125	1.01006	0.03266	2.96908
1.03897	0.0016	0.14526	1.03627	0.00303	0.27544	1.03897	0.00421	0.38236	1.03897	0.01352	1.2293	1.01008	0.03246	2.95133
1.03882	0.00124	0.11267	1.0363	0.00283	0.25735	1.03882	0.00436	0.39612	1.03882	0.01342	1.22043	1.00996	0.03242	2.94744
1.03867	0.00156	0.14196	1.03599	0.00301	0.27377	1.03867	0.00393	0.35697	1.03867	0.0132	1.20017	1.01004	0.03217	2.92442
1.03851	0.00123	0.11147	1.03568	0.00318	0.28917	1.03851	0.00417	0.37906	1.03851	0.01283	1.16605	1.00994	0.0321	2.91859
1.03836	0.00149	0.13589	1.03574	0.00294	0.26761	1.03836	0.00396	0.36036	1.03836	0.01259	1.14469	1.01015	0.0317	2.88169
1.03821	0.00125	0.11322	1.03581	0.0027	0.24531	1.03821	0.00376	0.34141	1.03821	0.01242	1.12943	1.01018	0.03149	2.8631
1.03806	0.00141	0.12828	1.03554	0.00283	0.2574	1.03806	0.00404	0.36746	1.03806	0.0125	1.13636	1.0104	0.03108	2.8251
1.0379	0.00125	0.11355	1.03521	0.00302	0.27471	1.0379	0.00358	0.32551	1.0379	0.01258	1.14385	1.01051	0.03078	2.79846
1.03775	0.00134	0.12201	1.03519	0.00288	0.26148	1.03775	0.00379	0.34418	1.03775	0.01232	1.11972	1.01064	0.03046	2.76905
1.0376	0.00126	0.11447	1.0353	0.00258	0.2349	1.0376	0.00378	0.34338	1.0376	0.01203	1.09336	1.01078	0.03013	2.73937
1.03745	0.0013	0.11816	1.03506	0.00268	0.2435	1.03745	0.00347	0.31533	1.03745	0.01174	1.06701	1.01079	0.02995	2.723
1.03729	0.00134	0.12149	1.03469	0.00292	0.26553	1.03729	0.00383	0.34851	1.03729	0.01153	1.04814	1.01094	0.02961	2.69165
1.03714	0.0012	0.10911	1.03458	0.00287	0.26134	1.03714	0.00346	0.31416	1.03714	0.01153	1.04814	1.01091	0.02947	2.67889
1.03699	0.00135	0.12271	1.03474	0.00253	0.23005	1.03699	0.0034	0.30884	1.03699	0.01149	1.04453	1.01092	0.02929	2.66307
1.03683	0.00112	0.10198	1.03462	0.00249	0.2263	1.03683	0.00363	0.32978	1.03683	0.01143	1.03954	1.01081	0.02924	2.65808
1.03668	0.00134	0.12221	1.03425	0.00274	0.24891	1.03668	0.00313	0.2849	1.03668	0.01128	1.02511	1.01087	0.029	2.63644
1.03653	0.00105	0.0951	1.03407	0.00276	0.2508	1.03653	0.0034	0.3095	1.03653	0.01086	0.98766	1.0107	0.02903	2.63866
1.03638	0.00134	0.12174	1.03418	0.00247	0.22419	1.03638	0.00329	0.29921	1.03638	0.01057	0.96047	1.01094	0.02858	2.59843
1.03622	0.000992126	0.09019	1.03415	0.00233	0.21174	1.03622	0.003	0.2723	1.03622	0.01048	0.95243	1.01095	0.0284	2.58179
1.03607	0.00131	0.11916	1.03381	0.00254	0.23069	1.03607	0.00333	0.30307	1.03607	0.01056	0.95964	1.01111	0.02805	2.5496
1.03592	0.000965576	0.08778	1.03354	0.00267	0.24256	1.03592	0.00295	0.26861	1.03592	0.01062	0.96574	1.01123	0.02774	2.52214
1.03577	0.00128	0.11647	1.03362	0.00242	0.21956	1.03577	0.00301	0.27396	1.03577	0.01049	0.95326	1.01138	0.0274	2.49107
1.03561	0.000939026	0.08537	1.03367	0.00219	0.199	1.03561	0.00313	0.28467	1.03561	0.01021	0.92773	1.01148	0.02711	2.46499
1.03546	0.00123	0.11147	1.03337	0.00235	0.21368	1.03546	0.00273	0.24775	1.03546	0.00988	0.89833	1.01153	0.02689	2.44474
1.03531	0.000958862	0.08717	1.03304	0.00255	0.23177	1.03531	0.00302	0.27494	1.03531	0.00969	0.88057	1.01166	0.02657	2.41533
1.03516	0.00115	0.10459	1.03306	0.00235	0.21401	1.03516	0.00276	0.25091	1.03516	0.00966	0.8778	1.01165	0.02642	2.40146
1.035	0.000968933	0.08808	1.03313	0.0021	0.19093	1.035	0.00263	0.23937	1.035	0.00968	0.87974	1.0116	0.0263	2.39091
1.03485	0.00109	0.09913	1.03291	0.00218	0.198	1.03485	0.00291	0.26417	1.03485	0.00963	0.87502	1.01151	0.02622	2.3837
1.0347	0.000982056	0.08928	1.03256	0.0024	0.21842	1.0347	0.00244	0.22186	1.0347	0.00949	0.86282	1.01156	0.026	2.36373
1.03455	0.000996094	0.09055	1.03248	0.00232	0.21088	1.03455	0.00268	0.24328	1.03455	0.00913	0.8298	1.01136	0.02606	2.36872
1.03439	0.00102	0.09291	1.0326	0.00201	0.1828	1.03439	0.00265	0.24131	1.03439	0.00875	0.7954	1.01156	0.02565	2.3321
1.03424	0.000913696	0.08306	1.03247	0.00199	0.18122	1.03424	0.00229	0.20857	1.03424	0.00875	0.7954	1.0116	0.02544	2.3124
1.03409	0.00104	0.0948	1.03207	0.00227	0.20655	1.03409	0.00269	0.24481	1.03409	0.00879	0.79901	1.01167	0.02519	2.28965
1.03394	0.000840149	0.07638	1.03192	0.00226	0.20552	1.03394	0.00232	0.21099	1.03394	0.00885	0.80483	1.01178	0.0249	2.26329
1.03378	0.00105	0.09583	1.03204	0.00195	0.17753	1.03378	0.0023	0.20941	1.03378	0.0088	0.80039	1.01197	0.02451	2.22778
1.03363	0.000781555	0.07105	1.03197	0.00187	0.16968	1.03363	0.00253	0.22977	1.03363	0.0085	0.77293	1.01204	0.02426	2.20503
1.03348	0.00107	0.09724	1.03161	0.0021	0.19129	1.03348	0.00205	0.18671	1.03348	0.00825	0.75018	1.01208	0.02404	2.18534
1.03333	0.000725708	0.06597	1.03138	0.00218	0.19853	1.03333	0.00233	0.21188	1.03333	0.00805	0.73187	1.01216	0.02379	2.16231
1.03317	0.00105	0.09558	1.03147	0.00192	0.17442	1.03317	0.00221	0.20089	1.03317	0.00796	0.72327	1.01216	0.02361	2.1465
1.03302	0.000707397	0.06431	1.03148	0.00173	0.15736	1.03302	0.00196	0.17836	1.03302	0.00809	0.7352	1.01207	0.02354	2.13956
1.03287	0.00102	0.09288	1.03117	0.00191	0.17387	1.03287	0.00228	0.20696	1.03287	0.00806	0.7327	1.01205	0.02339	2.12652
1.03271	0.000682373	0.06203	1.03085	0.00209	0.19007	1.03271	0.0019	0.17295	1.03271	0.00793	0.72049	1.01204	0.02323	2.11209
1.03256	0.000982971	0.08936	1.0309	0.00187	0.1702	1.03256	0.00202	0.18372	1.03256	0.00759	0.68997	1.01189	0.02323	2.11154
1.03241	0.000684814	0.06226	1.03096	0.00163	0.14829	1.03241	0.0021	0.19115	1.03241	0.00725	0.65946	1.01202	0.02291	2.08296
1.03226	0.000911865	0.0829	1.03069	0.00177	0.16058	1.03226	0.00173	0.15736	1.03226	0.00718	0.65252	1.01203	0.02273	2.06632
1.0321	0.000705566	0.06414	1.03035	0.00197	0.17922	1.0321	0.00207	0.1886	1.0321	0.00721	0.6553	1.01207	0.02251	2.04634
1.03195	0.00085083	0.07735	1.03032	0.00184	0.16707	1.03195	0.00177	0.16094	1.03195	0.00729	0.66306	1.01216	0.02224	2.02165
1.0318	0.000722351	0.06567	1.03041	0.00156	0.14213	1.0318	0.00168	0.1527	1.0318	0.00723	0.65752	1.01237	0.02183	1.98475
1.03165	0.00078125	0.07102	1.03023	0.00159	0.1446	1.03165	0.00196	0.17814	1.03165	0.00699	0.63504	1.01241	0.02162	1.96505
1.03149	0.00076416	0.06947	1.02985	0.00185	0.16835	1.03149	0.00148	0.13425	1.03149	0.00674	0.61229	1.01252	0.02132	1.93814
1.03134	0.000698242	0.06348	1.02972	0.00182	0.16546	1.03134	0.00174	0.15852	1.03134	0.00656	0.59648	1.01248	0.02119	1.92677
1.03119	0.00079895	0.07263	1.02986	0.0015	0.13597	1.03119	0.00169	0.15384	1.03119	0.00645	0.58594	1.01253	0.02097	1.90596
1.03104	0.000624695	0.05679	1.02975	0.00145	0.13142	1.03104	0.00137	0.12471	1.03104	0.00659	0.59953	1.01239	0.02095	1.90457
1.03088	0.000808105	0.07346	1.02936	0.00171	0.1555	1.03088	0.00177	0.16072	1.03088	0.00669	0.60785	1.01236	0.02082	1.89237
1.03073	0.000556335	0.05058	1.02918	0.00174	0.15833	1.03073	0.00139	0.12629	1.03073	0.00648	0.58871	1.01234	0.02067	1.87877
1.03058	0.000818481	0.07441	1.02927	0.00147	0.13322	1.03058	0.00141	0.12842	1.03058	0.00617	0.56125	1.01225	0.0206	1.87239
1.03043	0.000501099	0.04555	1.02924	0.00133	0.1211	1.03043	0.00162	0.14729	1.03043	0.00588	0.53461	1.01229	0.02038	1.85269
1.03027	0.0008255	0.07505	1.0289	0.00154	0.13999	1.03027	0.00118	0.10751	1.03027	0.00572	0.51963	1.01224	0.02026	1.84187
1.03012	0.000434875	0.03953	1.02866	0.00164	0.14884	1.03012	0.0014	0.12767	1.03012	0.00573	0.52074	1.01236	0.01995	1.81385
1.02997	0.000766296	0.06966	1.02871	0.00141	0.12856	1.02997	0.00126	0.11439	1.02997	0.00578	0.52518	1.01244	0.01969	1.78999
1.02982	0.000433044	0.03937	1.02876	0.00118	0.10751	1.02982	0.00106	0.09616	1.02982	0.00575	0.52241	1.01264	0.0193	1.75476
1.02966	0.000753174	0.06847	1.02845	0.00136	0.12346	1.02966	0.00137	0.12412	1.02966	0.00558	0.50715	1.01265	0.01912	1.73784
1.02951	0.000436096	0.03965	1.02812	0.00156	0.14188	1.02951	0.000972595	0.08842	1.02951	0.00529	0.48079	1.01284	0.01873	1.70316
1.02936	0.000700073	0.06364	1.02811	0.0014	0.12723	1.02936	0.00116	0.10551	1.02936	0.00511	0.46498	1.01271	0.01871	1.70066
1.02921	0.000463867	0.04217	1.02819	0.00114	0.10395	1.02921	0.0012	0.10931	1.02921	0.005	0.45471	1.01276	0.01848	1.67985
1.02905	0.00063446	0.05768	1.02797	0.00122	0.11058	1.02905	0.000841064	0.07646	1.02905	0.00515	0.46831	1.01262	0.01846	1.67819
1.0289	0.00048645	0.04422	1.02761	0.00145	0.13222	1.0289	0.00124	0.11264	1.0289	0.00529	0.48107	1.01259	0.01832	1.6657
1.02875	0.000577698	0.05252	1.0275	0.0014	0.12709	1.02875	0.000906677	0.08243	1.02875	0.00508	0.46193	1.01252	0.01824	1.65794
1.02859	0.000533142	0.04847	1.02763	0.00108	0.0981	1.02859	0.000855713	0.07779	1.02859	0.00485	0.44059	1.01246	0.01813	1.64823
1.02844	0.000487671	0.04433	1.0275	0.00106	0.09669	1.02844	0.00113	0.10232	1.02844	0.00456	0.41454	1.01246	0.01796	1.63241
1.02829	0.000567627	0.0516	1.02708	0.00135	0.12318	1.02829	0.000651245	0.0592	1.02829	0.00439	0.39939	1.01238	0.01788	1.62548
1.02814	0.000421143	0.03829	1.02694	0.00135	0.12263	1.02814	0.000943909	0.08581	1.02814	0.00445	0.40427	1.01247	0.01761	1.60051
1.02798	0.000593567	0.05396	1.02705	0.00105	0.09535	1.02798	0.000860901	0.07826	1.02798	0.00448	0.40771	1.01253	0.01736	1.57859
1.02783	0.000372009	0.03382	1.02697	0.000971069	0.08828	1.02783	0.000566406	0.05149	1.02783	0.00447	0.40669	1.01269	0.01701	1.54669
1.02768	0.000612183	0.05565	1.0266	0.00121	0.10984	1.02768	0.000952148	0.08656	1.02768	0.00437	0.39731	1.01269	0.01684	1.53087
1.02753	0.000316772	0.0288	1.02636	0.00131	0.11916	1.02753	0.000591736	0.05379	1.02753	0.00402	0.36571	1.01292	0.01641	1.49203
1.02737	0.000623474	0.05668	1.02643	0.00106	0.0968	1.02737	0.000640259	0.05821	1.02737	0.00379	0.34446	1.01274	0.01644	1.49481
1.02722	0.000275574	0.02505	1.02645	0.000864563	0.0786	1.02722	0.000812988	0.07391	1.02722	0.00375	0.34077	1.01279	0.01622	1.47428
1.02707	0.00061615	0.05601	1.02613	0.00106	0.09616	1.02707	0.000422974	0.03845	1.02707	0.00388	0.35314	1.0127	0.01614	1.46734
1.02692	0.000265808	0.02416	1.0258	0.00125	0.11369	1.02692	0.000721436	0.06559	1.02692	0.00399	0.36274	1.01263	0.01605	1.45902
1.02676	0.000582581	0.05296	1.02584	0.00104	0.09458	1.02676	0.000519409	0.04722	1.02676	0.00391	0.35559	1.01249	0.01603	1.45763
1.02661	0.000255432	0.02322	1.0259	0.000796814	0.07244	1.02661	0.000374451	0.03404	1.02661	0.00368	0.33453	1.01243	0.01593	1.44848
1.02646	0.00053772	0.04888	1.02563	0.000925598	0.08415	1.02646	0.000665894	0.06054	1.02646	0.00341	0.31028	1.01246	0.01573	1.42989
1.02631	0.000281067	0.02555	1.02529	0.00114	0.10379	1.02631	0.000233459	0.02122	1.02631	0.00327	0.29735	1.01236	0.01566	1.42406
1.02615	0.00046936	0.04267	1.02523	0.00104	0.09422	1.02615	0.00047821	0.04347	1.02615	0.00328	0.29846	1.01242	0.01543	1.40242
1.026	0.000304565	0.02769	1.02533	0.000752563	0.06841	1.026	0.000487366	0.04431	1.026	0.00334	0.30404	1.01252	0.01515	1.37745
1.02585	0.000419312	0.03812	1.02517	0.000760193	0.06911	1.02585	0.000142212	0.01293	1.02585	0.00335	0.30459	1.0126	0.01489	1.35359
1.0257	0.000335083	0.03046	1.02477	0.00104	0.09444	1.0257	0.000549316	0.04994	1.0257	0.00327	0.29685	1.0126	0.01472	1.33778
1.02554	0.000337524	0.03068	1.02463	0.00102	0.09291	1.02554	0.000203552	0.0185	1.02554	0.00294	0.267	1.01282	0.01429	1.29949
1.02539	0.000371399	0.03376	1.02477	0.00070282	0.06389	1.02539	0.000179443	0.01631	1.02539	0.00262	0.23831	1.01267	0.01429	1.29894
1.02524	0.000268555	0.02441	1.02464	0.000667419	0.06067	1.02524	0.000446167	0.04056	1.02524	0.00266	0.24139	1.01267	0.01413	1.28424
1.02509	0.000404358	0.03676	1.02427	0.000915833	0.08326	1.02509	-9.76562e-06	-0.000887784	1.02509	0.00273	0.24819	1.01262	0.01401	1.27342
1.02493	0.000207214	0.01884	1.02407	0.000974121	0.08856	1.02493	0.0002771	0.02519	1.02493	0.00285	0.25951	1.01255	0.01392	1.26509
1.02478	0.000428162	0.03892	1.02415	0.000711365	0.06467	1.02478	0.000186157	0.01692	1.02478	0.00284	0.2584	1.01236	0.01396	1.2687
1.02463	0.000158386	0.0144	1.02413	0.00056366	0.05124	1.02463	-6.68335e-05	-0.00608	1.02463	0.00261	0.23704	1.01233	0.01382	1.25649
1.02448	0.00044342	0.04031	1.02378	0.000775757	0.07052	1.02448	0.000280151	0.02547	1.02448	0.00237	0.21568	1.01227	0.01371	1.2465
1.02432	0.000111084	0.0101	1.02349	0.000932617	0.08478	1.02432	-6.34766e-05	-0.00577	1.02432	0.00222	0.20189	1.01226	0.01355	1.23208
1.02417	0.000439758	0.03998	1.02354	0.000708008	0.06436	1.02417	2.53296e-05	0.0023	1.02417	0.00217	0.19759	1.01225	0.0134	1.21793
1.02402	9.8877e-05	0.00899	1.02359	0.000477295	0.04339	1.02402	0.000153198	0.01393	1.02402	0.00234	0.2124	1.01238	0.01308	1.1888
1.02386	0.000418396	0.03804	1.02329	0.000647278	0.05884	1.02386	-0.000215454	-0.01959	1.02386	0.00236	0.21423	1.01241	0.01287	1.17021
1.02371	8.20923e-05	0.00746	1.02295	0.000857239	0.07793	1.02371	0.000131836	0.01199	1.02371	0.00226	0.20549	1.01243	0.01267	1.15218
1.02356	0.000386047	0.0351	1.02294	0.000695801	0.06325	1.02356	-0.00013855	-0.0126	1.02356	0.00196	0.17825	1.01256	0.01235	1.12305
1.02341	0.000100708	0.00916	1.02302	0.000429382	0.03903	1.02341	-0.000229492	-0.02086	1.02341	0.00166	0.15078	1.01248	0.01228	1.11611
1.02325	0.000317993	0.02891	1.0228	0.00051239	0.04658	1.02325	5.12695e-05	0.00466	1.02325	0.00163	0.14843	1.01249	0.01209	1.09919
1.0231	0.000126343	0.01149	1.02243	0.000750732	0.06825	1.0231	-0.000398254	-0.0362	1.0231	0.00169	0.15375	1.01244	0.01198	1.08892
1.02295	0.000266113	0.02419	1.02231	0.000713806	0.06489	1.02295	-0.000133362	-0.01212	1.02295	0.00181	0.16488	1.01235	0.01191	1.08254
1.0228	0.000152283	0.01384	1.02245	0.000394897	0.0359	1.0228	-0.00014801	-0.01346	1.0228	0.0018	0.16382	1.01215	0.01196	1.08754
1.02264	0.000193176	0.01756	1.02231	0.000378418	0.0344	1.02264	-0.000473328	-0.04303	1.02264	0.00158	0.14388	1.01213	0.01182	1.07422
1.02249	0.000199585	0.01814	1.02191	0.000653381	0.0594	1.02249	-5.34058e-05	-0.00486	1.02249	0.00138	0.12562	1.01196	0.01183	1.07533
1.02234	0.00012207	0.0111	1.02174	0.000674438	0.06131	1.02234	-0.000406494	-0.03695	1.02234	0.00122	0.11056	1.01204	0.01158	1.0523
1.02219	0.000231628	0.02106	1.02184	0.000386353	0.03512	1.02219	-0.000395508	-0.03596	1.02219	0.00115	0.10479	1.01197	0.01148	1.04342
1.02203	5.82886e-05	0.0053	1.02177	0.000299377	0.02722	1.02203	-0.000161743	-0.0147	1.02203	0.00134	0.12196	1.01211	0.01115	1.01346
1.02188	0.000264893	0.02408	1.02141	0.000527039	0.04791	1.02188	-0.000597839	-0.05435	1.02188	0.00145	0.13164	1.01212	0.01096	0.99682
1.02173	3.35693e-06	0.000305176	1.02115	0.000646057	0.05873	1.02173	-0.000307922	-0.02799	1.02173	0.0013	0.11832	1.01217	0.01074	0.97629
1.02158	0.000278015	0.02527	1.02122	0.000400391	0.0364	1.02158	-0.000421753	-0.03834	1.02158	0.00103	0.09347	1.01222	0.01051	0.95548
1.02142	-4.02832e-05	-0.00366	1.02124	0.000202637	0.01842	1.02142	-0.000647583	-0.05887	1.02142	0.00076355	0.06941	1.01219	0.01038	0.94327
1.02127	0.000289307	0.0263	1.02093	0.000385437	0.03504	1.02127	-0.000305481	-0.02777	1.02127	0.000662231	0.0602	1.01226	0.01013	0.9208
1.02112	-6.46973e-05	-0.00588	1.0206	0.000583496	0.05305	1.02112	-0.000673523	-0.06123	1.02112	0.000740051	0.06728	1.01216	0.01007	0.91553
1.02097	0.000263367	0.02394	1.02061	0.000396423	0.03604	1.02097	-0.000514832	-0.0468	1.02097	0.000838318	0.07621	1.01206	0.01	0.90942
1.02081	-7.44629e-05	-0.00677	1.02067	0.000157776	0.01434	1.02081	-0.000449524	-0.04087	1.02081	0.000833435	0.07577	1.01186	0.01006	0.9147
1.02066	0.00023407	0.02128	1.02042	0.000267944	0.02436	1.02066	-0.000794983	-0.07227	1.02066	0.000692139	0.06292	1.01185	0.0099	0.89971
1.02051	-6.62231e-05	-0.00602	1.02007	0.000493774	0.04489	1.02051	-0.00040741	-0.03704	1.02051	0.000434265	0.03948	1.0116	0.01001	0.90998
1.02036	0.000187378	0.01703	1.02	0.000404053	0.03673	1.02036	-0.000710449	-0.06459	1.02036	0.000282898	0.02572	1.01173	0.00969	0.88085
1.0202	-2.86865e-05	-0.00261	1.0201	0.000110779	0.01007	1.0202	-0.000775146	-0.07047	1.0202	0.000218201	0.01984	1.01166	0.0096	0.8728
1.02005	0.000131531	0.01196	1.01994	0.000126648	0.01151	1.02005	-0.000488281	-0.04439	1.02005	0.000384521	0.03496	1.01174	0.00933	0.84839
1.0199	-1.09863e-05	-0.000998757	1.01953	0.000409851	0.03726	1.0199	-0.000949707	-0.08634	1.0199	0.000544128	0.04947	1.01177	0.00913	0.8298
1.01974	7.38525e-05	0.00671	1.01939	0.000400696	0.03643	1.01974	-0.000658875	-0.0599	1.01974	0.000391846	0.03562	1.01184	0.00888	0.80705
1.01959	3.75366e-05	0.00341	1.01951	9.76563e-05	0.00888	1.01959	-0.000710449	-0.06459	1.01959	0.000167847	0.01526	1.01185	0.0087	0.79068
1.01944	-5.79834e-06	-0.000527122	1.0194	4.30298e-05	0.00391	1.01944	-0.00101	-0.09175	1.01944	-8.97217e-05	-0.00816	1.01182	0.00856	0.77848
1.01929	7.87354e-05	0.00716	1.01902	0.000301819	0.02744	1.01929	-0.000605774	-0.05507	1.01929	-0.000234375	-0.02131	1.01188	0.00832	0.75628
1.01913	-7.1106e-05	-0.00646	1.01881	0.000360413	0.03276	1.01913	-0.000953979	-0.08673	1.01913	-0.000127563	-0.0116	1.01176	0.00829	0.75351
1.01898	0.000108948	0.0099	1.01888	0.000109558	0.00996	1.01898	-0.000914001	-0.08309	1.01898	-7.14111e-05	-0.00649	1.01164	0.00825	0.75018
1.01883	-0.000124207	-0.01129	1.01887	-4.57764e-05	-0.00416	1.01883	-0.000710449	-0.06459	1.01883	-4.85229e-05	-0.00441	1.0115	0.00823	0.74851
1.01868	0.000126038	0.01146	1.01853	0.000160217	0.01457	1.01868	-0.00111	-0.10082	1.01868	-0.000137939	-0.01254	1.01146	0.00811	0.73686
1.01852	-0.000173035	-0.01573	1.01823	0.000327759	0.0298	1.01852	-0.000814514	-0.07405	1.01852	-0.000444946	-0.04045	1.01119	0.00825	0.74962
1.01837	0.000143127	0.01301	1.01827	0.000118408	0.01076	1.01837	-0.000973206	-0.08847	1.01837	-0.000650024	-0.05909	1.01132	0.00793	0.72077
1.01822	-0.000197754	-0.01798	1.01832	-0.000117798	-0.01071	1.01822	-0.00113	-0.1029	1.01822	-0.000666504	-0.06059	1.01126	0.00782	0.71106
1.01807	0.000129395	0.01176	1.01803	4.57764e-05	0.00416	1.01807	-0.000825806	-0.07507	1.01807	-0.000523071	-0.04755	1.01127	0.00763	0.69386
1.01791	-0.000178223	-0.0162	1.01766	0.000284729	0.02588	1.01791	-0.0012	-0.10923	1.01791	-0.000338135	-0.03074	1.01127	0.00746	0.67832
1.01776	0.000140076	0.01273	1.01763	0.000151062	0.01373	1.01776	-0.000972595	-0.08842	1.01776	-0.000411987	-0.03745	1.01138	0.00717	0.65141
1.01761	-0.000187378	-0.01703	1.01771	-0.000113831	-0.01035	1.01761	-0.000941162	-0.08556	1.01761	-0.000609741	-0.05543	1.01139	0.00699	0.63532
1.01746	8.60596e-05	0.00782	1.0175	-5.27954e-05	-0.0048	1.01746	-0.00129	-0.11685	1.01746	-0.000868835	-0.07899	1.01137	0.00684	0.62173
1.0173	-0.000161438	-0.01468	1.01712	0.000206909	0.01881	1.0173	-0.000877991	-0.07982	1.0173	-0.000983582	-0.08942	1.01136	0.00668	0.60702
1.01715	2.13623e-05	0.00194	1.01701	0.000163269	0.01484	1.01715	-0.00121	-0.10959	1.01715	-0.000935974	-0.08509	1.0113	0.00658	0.59814
1.017	-0.000152893	-0.0139	1.01713	-0.000148926	-0.01354	1.017	-0.00123	-0.11197	1.017	-0.000846252	-0.07693	1.01113	0.00659	0.59953
1.01685	-4.18091e-05	-0.0038	1.017	-0.000171509	-0.01559	1.01685	-0.000967407	-0.08795	1.01685	-0.000823059	-0.07482	1.01103	0.00654	0.59454
1.01669	-0.000113831	-0.01035	1.0166	0.000101318	0.00921	1.01669	-0.00143	-0.12967	1.01669	-0.000888367	-0.08076	1.01096	0.00645	0.58594
1.01654	-0.000119934	-0.0109	1.01643	0.0001297	0.01179	1.01654	-0.00112	-0.10201	1.01654	-0.00119	-0.10831	1.01074	0.00652	0.59232
1.01639	-6.19507e-05	-0.00563	1.01652	-0.000152283	-0.01384	1.01639	-0.00119	-0.1085	1.01639	-0.00147	-0.13375	1.01079	0.00629	0.57179
1.01624	-0.000177002	-0.01609	1.01647	-0.000258179	-0.02347	1.01624	-0.00147	-0.1332	1.01624	-0.00143	-0.13034	1.01074	0.00617	0.56097
1.01608	-3.479e-05	-0.00316	1.0161	-2.34985e-05	-0.00214	1.01608	-0.00108	-0.09813	1.01608	-0.00131	-0.11905	1.0107	0.00604	0.54932
1.01593	-0.000237732	-0.02161	1.01584	0.000101624	0.00924	1.01593	-0.00143	-0.12967	1.01593	-0.00119	-0.10792	1.01073	0.00584	0.53073
1.01578	-1.15967e-05	-0.00105	1.01589	-0.000124512	-0.01132	1.01578	-0.00135	-0.12268	1.01578	-0.00118	-0.10703	1.01087	0.00551	0.50104
1.01563	-0.000289001	-0.02627	1.01593	-0.00033905	-0.03082	1.01563	-0.00119	-0.10787	1.01563	-0.00139	-0.12676	1.01084	0.00537	0.48828
1.01547	3.72314e-05	0.00338	1.01558	-0.000115967	-0.01054	1.01547	-0.00153	-0.13919	1.01547	-0.00156	-0.14218	1.01085	0.00519	0.47191
1.01532	-0.000296936	-0.02699	1.01524	8.75854e-05	0.00796	1.01532	-0.0012	-0.10917	1.01532	-0.0017	-0.15439	1.01078	0.00511	0.46414
1.01517	2.7771e-05	0.00252	1.01526	-0.000105591	-0.0096	1.01517	-0.00142	-0.12901	1.01517	-0.00171	-0.15508	1.01075	0.00497	0.45155
1.01501	-0.000318298	-0.02894	1.01532	-0.000348206	-0.03166	1.01501	-0.00154	-0.14002	1.01501	-0.00154	-0.14019	1.01054	0.00502	0.45665
1.01486	1.86157e-05	0.00169	1.01507	-0.000235901	-0.02145	1.01486	-0.00124	-0.11289	1.01486	-0.00151	-0.13747	1.01045	0.00495	0.45016
1.01471	-0.000325928	-0.02963	1.01472	-7.01904e-06	-0.000638095	1.01471	-0.00169	-0.15359	1.01471	-0.00158	-0.14382	1.01036	0.00489	0.44436
1.01456	-2.47192e-05	-0.00225	1.01464	-9.61304e-05	-0.00874	1.01456	-0.00141	-0.12842	1.01456	-0.00187	-0.1699	1.01021	0.00489	0.44417
1.0144	-0.000307312	-0.02794	1.01475	-0.000383301	-0.03485	1.0144	-0.00141	-0.12776	1.0144	-0.00216	-0.19678	1.01017	0.00476	0.4323
1.01425	-9.06372e-05	-0.00824	1.01459	-0.000374756	-0.03407	1.01425	-0.00173	-0.15764	1.01425	-0.00213	-0.1934	1.01008	0.00468	0.4258
1.0141	-0.000274963	-0.025	1.01418	-8.78906e-05	-0.00799	1.0141	-0.00132	-0.11985	1.0141	-0.00205	-0.18621	1.01008	0.00451	0.41038
1.01395	-0.000142517	-0.01296	1.01403	-8.8501e-05	-0.00805	1.01395	-0.00166	-0.15087	1.01395	-0.00191	-0.17345	1.0101	0.00433	0.39334
1.01379	-0.00025116	-0.02283	1.01414	-0.000392151	-0.03565	1.01379	-0.00166	-0.15065	1.01379	-0.00189	-0.17192	1.01023	0.00401	0.36413
1.01364	-0.00020874	-0.01898	1.01405	-0.000453796	-0.04125	1.01364	-0.00141	-0.12773	1.01364	-0.0021	-0.19054	1.01018	0.00389	0.35353
1.01349	-0.000193481	-0.01759	1.01366	-0.000195007	-0.01773	1.01349	-0.00185	-0.16829	1.01349	-0.00228	-0.2073	1.01032	0.00357	0.3241
1.01334	-0.000275879	-0.02508	1.01344	-0.000119019	-0.01082	1.01334	-0.00155	-0.14069	1.01334	-0.00242	-0.2202	1.01013	0.0036	0.32759
1.01318	-0.000158691	-0.01443	1.01352	-0.000376282	-0.03421	1.01318	-0.00165	-0.14959	1.01318	-0.00247	-0.2243	1.01012	0.00344	0.31308
1.01303	-0.000333862	-0.03035	1.0135	-0.000531616	-0.04833	1.01303	-0.00187	-0.1704	1.01303	-0.00226	-0.20558	1.00993	0.00348	0.3163
1.01288	-0.000129089	-0.01174	1.01318	-0.000333862	-0.03035	1.01288	-0.00153	-0.13916	1.01288	-0.00216	-0.19645	1.00983	0.00342	0.31128
1.01273	-0.000384521	-0.03496	1.01286	-0.000153809	-0.01398	1.01273	-0.00188	-0.17104	1.01273	-0.00227	-0.20644	1.00969	0.00341	0.31003
1.01257	-0.000105286	-0.00957	1.0129	-0.000361633	-0.03288	1.01257	-0.00174	-0.1585	1.01257	-0.00253	-0.23032	1.00959	0.00336	0.30523
1.01242	-0.000425415	-0.03867	1.01295	-0.000596008	-0.05418	1.01242	-0.00162	-0.14757	1.01242	-0.00278	-0.25246	1.00952	0.00326	0.29644
1.01227	-9.73511e-05	-0.00885	1.01266	-0.000439453	-0.03995	1.01227	-0.00199	-0.1808	1.01227	-0.00286	-0.25968	1.00939	0.00323	0.29377
1.01212	-0.000434265	-0.03948	1.01231	-0.000220947	-0.02009	1.01212	-0.00161	-0.1464	1.01212	-0.00277	-0.25174	1.00942	0.00303	0.27535
1.01196	-0.000115967	-0.01054	1.01228	-0.000357666	-0.03252	1.01196	-0.00189	-0.17204	1.01196	-0.00263	-0.23865	1.00945	0.00283	0.25704
1.01181	-0.000453186	-0.0412	1.01236	-0.00061554	-0.05596	1.01181	-0.00196	-0.17847	1.01181	-0.00262	-0.23798	1.00953	0.00257	0.23321
1.01166	-0.000141907	-0.0129	1.01216	-0.000561523	-0.05105	1.01166	-0.00167	-0.15201	1.01166	-0.00276	-0.25116	1.00947	0.00246	0.22333
1.01151	-0.000439453	-0.03995	1.01177	-0.000295715	-0.02688	1.01151	-0.00212	-0.19295	1.01151	-0.00297	-0.27041	1.00965	0.00209	0.18996
1.01135	-0.000195923	-0.01781	1.01164	-0.000318604	-0.02896	1.01135	-0.00184	-0.16688	1.01135	-0.00312	-0.2832	1.00943	0.00216	0.19601
1.0112	-0.000402222	-0.03657	1.01176	-0.000632935	-0.05754	1.0112	-0.00185	-0.16857	1.0112	-0.00316	-0.28756	1.0094	0.00202	0.18352
1.01105	-0.000245667	-0.02233	1.01164	-0.000660706	-0.06006	1.01105	-0.00217	-0.19709	1.01105	-0.00297	-0.26969	1.00928	0.00199	0.18094
1.01089	-0.000378113	-0.03437	1.01124	-0.000385132	-0.03501	1.01089	-0.00174	-0.15861	1.01089	-0.00278	-0.25313	1.00915	0.00196	0.17817
1.01074	-0.000304871	-0.02772	1.01106	-0.000354919	-0.03227	1.01074	-0.0021	-0.19071	1.01074	-0.00296	-0.26864	1.00897	0.00199	0.18122
1.01059	-0.000326538	-0.02969	1.01113	-0.000612183	-0.05565	1.01059	-0.00205	-0.18668	1.01059	-0.00315	-0.28662	1.00887	0.00193	0.17548
1.01044	-0.000372314	-0.03385	1.01108	-0.000722961	-0.06572	1.01044	-0.00183	-0.16646	1.01044	-0.00339	-0.30831	1.00879	0.00185	0.16787
1.01028	-0.000285034	-0.02591	1.01072	-0.000489502	-0.0445	1.01028	-0.00225	-0.20425	1.01028	-0.00352	-0.31955	1.00868	0.0018	0.16363
1.01013	-0.00043396	-0.03945	1.01044	-0.000350952	-0.0319	1.01013	-0.00195	-0.17686	1.01013	-0.00341	-0.30978	1.00867	0.00164	0.14909
1.00998	-0.000252075	-0.02292	1.01049	-0.000578003	-0.05255	1.00998	-0.00206	-0.18768	1.00998	-0.00332	-0.30174	1.00873	0.00141	0.12806
1.00983	-0.000481567	-0.04378	1.01053	-0.000792236	-0.07202	1.00983	-0.00226	-0.2058	1.00983	-0.00328	-0.29843	1.00873	0.00123	0.11178
1.00967	-0.000233154	-0.0212	1.01022	-0.000610657	-0.05551	1.00967	-0.00194	-0.17634	1.00967	-0.00337	-0.30604	1.00871	0.00108	0.09846
1.00952	-0.000531311	-0.0483	1.00988	-0.000402832	-0.03662	1.00952	-0.0023	-0.20954	1.00952	-0.00365	-0.332	1.00883	0.000773621	0.07033
1.00937	-0.00020752	-0.01887	1.00988	-0.000570374	-0.05185	1.00937	-0.00211	-0.19184	1.00937	-0.00379	-0.34477	1.00866	0.000794067	0.07219
1.00922	-0.000556335	-0.05058	1.00994	-0.00081604	-0.07419	1.00922	-0.00205	-0.18613	1.00922	-0.00383	-0.34782	1.00862	0.000666504	0.06059
1.00906	-0.000219116	-0.01992	1.00969	-0.000708923	-0.06445	1.00906	-0.00238	-0.21606	1.00906	-0.00364	-0.33103	1.00853	0.00059906	0.05446
1.00891	-0.000559998	-0.05091	1.00934	-0.00047821	-0.04347	1.00891	-0.00198	-0.18008	1.00891	-0.00348	-0.31655	1.00839	0.000588379	0.05349
1.00876	-0.00023468	-0.02133	1.00924	-0.000536499	-0.04877	1.00876	-0.00229	-0.20846	1.00876	-0.00358	-0.32571	1.00817	0.000663147	0.06029
1.00861	-0.000549011	-0.04991	1.00935	-0.000838928	-0.07627	1.00861	-0.00233	-0.21226	1.00861	-0.00376	-0.34157	1.00809	0.000582886	0.05299
1.00845	-0.000276489	-0.02514	1.00919	-0.000830078	-0.07546	1.00845	-0.00205	-0.18599	1.00845	-0.004	-0.36385	1.00796	0.000558167	0.05074
1.0083	-0.000525208	-0.04775	1.00879	-0.000545044	-0.04955	1.0083	-0.00251	-0.2283	1.0083	-0.0041	-0.37281	1.00791	0.000434265	0.03948
1.00815	-0.000376892	-0.03426	1.00868	-0.000592957	-0.05391	1.00815	-0.00226	-0.20508	1.00815	-0.00408	-0.37051	1.00791	0.000266113	0.02419
1.008	-0.00053772	-0.04888	1.00878	-0.000883789	-0.08034	1.008	-0.00231	-0.20971	1.008	-0.00398	-0.36177	1.00798	1.98364e-05	0.0018
1.00784	-0.000412903	-0.03754	1.00868	-0.000939026	-0.08537	1.00784	-0.00259	-0.23554	1.00784	-0.00395	-0.35911	1.00797	-0.000137634	-0.01251
1.00769	-0.000485535	-0.04414	1.0083	-0.000687561	-0.06251	1.00769	-0.00219	-0.19864	1.00769	-0.004	-0.36388	1.00795	-0.000296631	-0.02697
1.00754	-0.000479736	-0.04361	1.00806	-0.000588989	-0.05354	1.00754	-0.00252	-0.22899	1.00754	-0.0043	-0.39046	1.00802	-0.000545654	-0.0496
1.00739	-0.000422363	-0.0384	1.00812	-0.000828552	-0.07532	1.00739	-0.00246	-0.22333	1.00739	-0.00453	-0.41168	1.00791	-0.000586243	-0.05329
1.00723	-0.000534058	-0.04855	1.00812	-0.000993042	-0.09028	1.00723	-0.00226	-0.20524	1.00723	-0.00447	-0.4063	1.00787	-0.000714111	-0.06492
1.00708	-0.000386353	-0.03512	1.00778	-0.000787964	-0.07163	1.00708	-0.00265	-0.24053	1.00708	-0.00433	-0.39393	1.00777	-0.00078064	-0.07097
1.00693	-0.000581665	-0.05288	1.00746	-0.000600891	-0.05463	1.00693	-0.00234	-0.21254	1.00693	-0.00418	-0.37983	1.00762	-0.000782166	-0.07111
1.00677	-0.000351868	-0.03199	1.00749	-0.000805054	-0.07319	1.00677	-0.00251	-0.22833	1.00677	-0.00418	-0.38033	1.00739	-0.000696716	-0.06334
1.00662	-0.000622864	-0.05662	1.00755	-0.00104	-0.09435	1.00662	-0.00264	-0.2399	1.00662	-0.00439	-0.39892	1.00732	-0.000786438	-0.07149
1.00647	-0.000324402	-0.02949	1.00726	-0.00088623	-0.08057	1.00647	-0.00232	-0.21113	1.00647	-0.0046	-0.41773	1.00712	-0.000729675	-0.06633
1.00632	-0.000653687	-0.05943	1.00691	-0.000663147	-0.06029	1.00632	-0.00275	-0.24969	1.00632	-0.00469	-0.42661	1.00715	-0.000931396	-0.08467
1.00616	-0.00032135	-0.02921	1.00685	-0.000774536	-0.07041	1.00616	-0.00248	-0.22544	1.00616	-0.00467	-0.42414	1.00705	-0.000999146	-0.09083
1.00601	-0.000659485	-0.05995	1.00694	-0.00104	-0.0948	1.00601	-0.00246	-0.22372	1.00601	-0.00451	-0.41002	1.00711	-0.00123	-0.11197
1.00586	-0.000337219	-0.03066	1.00675	-0.001	-0.09103	1.00586	-0.00279	-0.25349	1.00586	-0.00448	-0.40719	1.0071	-0.0014	-0.1269
1.00571	-0.000658875	-0.0599	1.00634	-0.00071106	-0.06464	1.00571	-0.00236	-0.21409	1.00571	-0.00452	-0.41046	1.0071	-0.00156	-0.14199
1.00555	-0.000353088	-0.0321	1.00621	-0.000732422	-0.06658	1.00555	-0.00269	-0.24497	1.00555	-0.0048	-0.43607	1.00711	-0.00175	-0.15916
1.0054	-0.00063324	-0.05757	1.00633	-0.00104	-0.09485	1.0054	-0.0027	-0.24531	1.0054	-0.00509	-0.46248	1.00703	-0.00183	-0.16624
1.00525	-0.000413818	-0.03762	1.0062	-0.00107	-0.09749	1.00525	-0.00242	-0.21973	1.00525	-0.00501	-0.45554	1.00702	-0.00199	-0.18114
1.0051	-0.000596313	-0.05421	1.0058	-0.000794983	-0.07227	1.0051	-0.00288	-0.26137	1.0051	-0.00489	-0.44495	1.00689	-0.00202	-0.18322
1.00494	-0.000461121	-0.04192	1.00561	-0.000746155	-0.06783	1.00494	-0.00256	-0.23307	1.00494	-0.00475	-0.43152	1.00675	-0.00203	-0.18488
1.00479	-0.000568237	-0.05166	1.0057	-0.00102	-0.09255	1.00479	-0.00264	-0.23967	1.00479	-0.00472	-0.4293	1.00653	-0.00195	-0.17745
1.00464	-0.000515137	-0.04683	1.00565	-0.00113	-0.1029	1.00464	-0.00289	-0.26259	1.00464	-0.00493	-0.44783	1.00646	-0.00204	-0.1858
1.00449	-0.000516357	-0.04694	1.00529	-0.000908813	-0.08262	1.00449	-0.00252	-0.22869	1.00449	-0.00508	-0.46165	1.00618	-0.0019	-0.17303
1.00433	-0.000583191	-0.05302	1.005	-0.000752258	-0.06839	1.00433	-0.00286	-0.2597	1.00433	-0.00521	-0.47385	1.00626	-0.00216	-0.19664
1.00418	-0.000476379	-0.04331	1.00504	-0.000965271	-0.08775	1.00418	-0.00275	-0.24969	1.00418	-0.00522	-0.47441	1.00614	-0.0022	-0.20036
1.00403	-0.000641174	-0.05829	1.00509	-0.00119	-0.10861	1.00403	-0.0026	-0.23634	1.00403	-0.00501	-0.45554	1.00616	-0.0024	-0.21817
1.00388	-0.000439148	-0.03992	1.00477	-0.00101	-0.09164	1.00388	-0.00296	-0.26886	1.00388	-0.00494	-0.44916	1.00617	-0.00257	-0.23407
1.00372	-0.000688782	-0.06262	1.00444	-0.000800171	-0.07274	1.00372	-0.0026	-0.23657	1.00372	-0.00501	-0.45582	1.0062	-0.00278	-0.25257
1.00357	-0.000414124	-0.03765	1.00443	-0.000964966	-0.08772	1.00357	-0.00285	-0.25871	1.00357	-0.00528	-0.47968	1.00617	-0.00292	-0.26531
1.00342	-0.000732422	-0.06658	1.00449	-0.00121	-0.10964	1.00342	-0.00294	-0.26689	1.00342	-0.00553	-0.50299	1.00612	-0.00303	-0.2756
1.00327	-0.000402527	-0.03659	1.00424	-0.0011	-0.09985	1.00327	-0.00263	-0.23934	1.00327	-0.00554	-0.50354	1.00611	-0.00319	-0.29025
1.00311	-0.000740356	-0.06731	1.00388	-0.000858154	-0.07801	1.00311	-0.00307	-0.27935	1.00311	-0.00545	-0.49522	1.00596	-0.0032	-0.29103
1.00296	-0.00041748	-0.03795	1.00377	-0.000913696	-0.08306	1.00296	-0.00278	-0.2526	1.00296	-0.00528	-0.47996	1.0058	-0.00319	-0.28992
1.00281	-0.00074585	-0.0678	1.00389	-0.00122	-0.11072	1.00281	-0.00278	-0.25299	1.00281	-0.00528	-0.47968	1.00562	-0.00316	-0.28698
1.00266	-0.000428772	-0.03898	1.00374	-0.00122	-0.11056	1.00266	-0.00309	-0.28132	1.00266	-0.00543	-0.49383	1.00553	-0.00323	-0.29366
1.0025	-0.000738831	-0.06717	1.00333	-0.000924377	-0.08403	1.0025	-0.00267	-0.24242	1.0025	-0.00561	-0.50992	1.00524	-0.00307	-0.27926
1.00235	-0.000473633	-0.04306	1.00316	-0.000911255	-0.08284	1.00235	-0.00302	-0.27444	1.00235	-0.00572	-0.51991	1.00531	-0.00333	-0.30271
1.0022	-0.000699768	-0.06362	1.00327	-0.00121	-0.10981	1.0022	-0.00299	-0.27208	1.0022	-0.00576	-0.52379	1.00521	-0.00339	-0.30787
1.00204	-0.000518494	-0.04714	1.00318	-0.00127	-0.11572	1.00204	-0.00274	-0.2493	1.00204	-0.00554	-0.50326	1.00519	-0.00354	-0.32171
1.00189	-0.00066864	-0.06079	1.0028	-0.00102	-0.09294	1.00189	-0.00316	-0.28706	1.00189	-0.00537	-0.48856	1.00518	-0.0037	-0.33592
1.00174	-0.000572205	-0.05202	1.00256	-0.000917358	-0.0834	1.00174	-0.00286	-0.25987	1.00174	-0.00551	-0.50077	1.00525	-0.00394	-0.35833
1.00159	-0.000628357	-0.05712	1.00262	-0.00116	-0.10576	1.00159	-0.00296	-0.269	1.00159	-0.00574	-0.52213	1.00521	-0.00407	-0.37043
1.00143	-0.000649414	-0.05904	1.00262	-0.00133	-0.12113	1.00143	-0.00317	-0.28795	1.00143	-0.00597	-0.54238	1.00516	-0.00418	-0.38011
1.00128	-0.000578308	-0.05257	1.00229	-0.00114	-0.1032	1.00128	-0.00282	-0.25649	1.00128	-0.00607	-0.55181	1.00512	-0.00431	-0.39212
1.00113	-0.000698853	-0.06353	1.00196	-0.000939026	-0.08537	1.00113	-0.00318	-0.2892	1.00113	-0.00594	-0.53988	1.00501	-0.00436	-0.39681
1.00098	-0.000542297	-0.0493	1.00199	-0.00114	-0.1032	1.00098	-0.00302	-0.2741	1.00098	-0.00583	-0.5299	1.00482	-0.00432	-0.39243
1.00082	-0.000751038	-0.06828	1.00203	-0.00136	-0.12332	1.00082	-0.00292	-0.26559	1.00082	-0.00578	-0.52546	1.00467	-0.00432	-0.39273
1.00067	-0.000506592	-0.04605	1.00176	-0.00122	-0.11092	1.00067	-0.00325	-0.29563	1.00067	-0.00587	-0.53406	1.00456	-0.00436	-0.39673
1.00052	-0.000792236	-0.07202	1.0014	-0.000989685	-0.08997	1.00052	-0.00286	-0.2602	1.00052	-0.00612	-0.55625	1.00428	-0.00423	-0.38419
1.00037	-0.000490417	-0.04458	1.00134	-0.00109	-0.09924	1.00037	-0.00316	-0.28734	1.00037	-0.00623	-0.56679	1.00431	-0.00443	-0.40303
1.00021	-0.000819397	-0.07449	1.00143	-0.00137	-0.12412	1.00021	-0.0032	-0.29086	1.00021	-0.00627	-0.57012	1.00422	-0.0045	-0.40882
1.00006	-0.000492859	-0.04481	1.00125	-0.00133	-0.12124	1.00006	-0.00291	-0.26442	1.00006	-0.00608	-0.55237	1.00416	-0.00461	-0.41903
0.99991	-0.000823059	-0.07482	1.00084	-0.00105	-0.09541	0.99991	-0.00335	-0.30484	0.99991	-0.00586	-0.53267	1.00417	-0.00478	-0.43488
0.99976	-0.000502625	-0.04569	1.0007	-0.00106	-0.09621	0.99976	-0.00305	-0.27716	0.99976	-0.00601	-0.54626	1.00427	-0.00507	-0.46082
0.9996	-0.000828857	-0.07535	1.00082	-0.00137	-0.12418	0.9996	-0.00309	-0.28109	0.9996	-0.00619	-0.56263	1.0042	-0.00516	-0.46942
0.99945	-0.000527954	-0.048	1.0007	-0.0014	-0.12726	0.99945	-0.00339	-0.30828	0.99945	-0.00641	-0.58316	1.00418	-0.00532	-0.48356
0.9993	-0.000802612	-0.07296	1.00031	-0.00113	-0.10309	0.9993	-0.00296	-0.2688	0.9993	-0.00652	-0.5926	1.00408	-0.00537	-0.48828
0.99915	-0.000586243	-0.05329	1.0001	-0.00108	-0.09777	0.99915	-0.0033	-0.30029	0.99915	-0.0064	-0.58178	1.004	-0.00545	-0.49577
0.99899	-0.000762634	-0.06933	1.00019	-0.00134	-0.12188	0.99899	-0.00326	-0.29591	0.99899	-0.00632	-0.57484	1.00377	-0.00537	-0.48828
0.99884	-0.000626831	-0.05698	1.00015	-0.00147	-0.13336	0.99884	-0.00304	-0.27654	0.99884	-0.00626	-0.56901	1.00365	-0.0054	-0.49078
0.99869	-0.000732727	-0.06661	0.9998	-0.00125	-0.11364	0.99869	-0.00343	-0.31158	0.99869	-0.0063	-0.57318	1.00352	-0.00543	-0.49355
0.99854	-0.000692444	-0.06295	0.99949	-0.00107	-0.09757	0.99854	-0.00313	-0.28445	0.99854	-0.0066	-0.60036	1.00331	-0.00536	-0.48745
0.99838	-0.000629272	-0.05721	0.99948	-0.00123	-0.11222	0.99838	-0.00321	-0.29153	0.99838	-0.00672	-0.61063	1.0032	-0.00542	-0.49244
0.99823	-0.000722656	-0.0657	0.99953	-0.00146	-0.13256	0.99823	-0.00338	-0.30731	0.99823	-0.00671	-0.6098	1.00309	-0.00546	-0.4966
0.99808	-0.000603638	-0.05488	0.99923	-0.00129	-0.11738	0.99808	-0.00305	-0.27732	0.99808	-0.00652	-0.59315	1.00305	-0.00558	-0.5077
0.99792	-0.000774231	-0.07038	0.99888	-0.00107	-0.09763	0.99792	-0.00345	-0.31364	0.99792	-0.00637	-0.57872	1.00304	-0.00575	-0.52241
0.99777	-0.000578003	-0.05255	0.99887	-0.00123	-0.11183	0.99777	-0.00321	-0.29197	0.99777	-0.00638	-0.58011	1.00314	-0.00603	-0.54793
0.99762	-0.000831299	-0.07557	0.99894	-0.00148	-0.1348	0.99762	-0.00317	-0.28856	0.99762	-0.00656	-0.59593	1.00306	-0.00611	-0.55542
0.99747	-0.00055481	-0.05044	0.99871	-0.0014	-0.1272	0.99747	-0.00349	-0.31752	0.99747	-0.00678	-0.61646	1.00313	-0.00636	-0.57817
0.99731	-0.000880737	-0.08007	0.99834	-0.00115	-0.10492	0.99731	-0.00308	-0.28004	0.99731	-0.00687	-0.62478	1.00293	-0.00631	-0.57401
0.99716	-0.000548401	-0.04985	0.99821	-0.00118	-0.10745	0.99716	-0.0034	-0.30917	0.99716	-0.0068	-0.61784	1.00289	-0.00644	-0.58538
0.99701	-0.00089386	-0.08126	0.99834	-0.00149	-0.13578	0.99701	-0.00343	-0.31147	0.99701	-0.00668	-0.6073	1.00265	-0.00634	-0.5765
0.99686	-0.000569458	-0.05177	0.9982	-0.00151	-0.13727	0.99686	-0.00315	-0.28606	0.99686	-0.00663	-0.60286	1.00254	-0.00638	-0.58011
0.9967	-0.000898438	-0.08168	0.9978	-0.00123	-0.11158	0.9967	-0.0036	-0.32712	0.9967	-0.00667	-0.60647	1.00237	-0.00637	-0.579
0.99655	-0.000585022	-0.05318	0.99762	-0.0012	-0.1092	0.99655	-0.00329	-0.29868	0.99655	-0.00695	-0.63144	1.00223	-0.00638	-0.57956
0.9964	-0.00088623	-0.08057	0.99772	-0.00148	-0.13492	0.9964	-0.00335	-0.30437	0.9964	-0.00722	-0.65613	1.00215	-0.00646	-0.5876
0.99625	-0.000629883	-0.05726	0.99764	-0.00156	-0.14199	0.99625	-0.00361	-0.3284	0.99625	-0.00713	-0.6478	1.00197	-0.00643	-0.58427
0.99609	-0.000855713	-0.07779	0.99727	-0.00133	-0.12063	0.99609	-0.00322	-0.29269	0.99609	-0.00699	-0.63588	1.00196	-0.00659	-0.59898
0.99594	-0.000682068	-0.06201	0.99701	-0.0012	-0.10881	0.99594	-0.00355	-0.3224	0.99594	-0.00684	-0.62173	1.00195	-0.00675	-0.6134
0.99579	-0.000820007	-0.07455	0.99706	-0.00143	-0.13	0.99579	-0.00348	-0.31591	0.99579	-0.00679	-0.61701	1.00201	-0.00699	-0.63588
0.99564	-0.00072052	-0.0655	0.99708	-0.00162	-0.14709	0.99564	-0.00329	-0.29891	0.99564	-0.00699	-0.6356	1.00193	-0.00707	-0.64281
0.99548	-0.000772705	-0.07025	0.99675	-0.00142	-0.12939	0.99548	-0.00367	-0.33331	0.99548	-0.00715	-0.6503	1.00207	-0.0074	-0.67277
0.99533	-0.000789795	-0.0718	0.99641	-0.00121	-0.11042	0.99533	-0.00333	-0.30251	0.99533	-0.00728	-0.6614	1.00181	-0.00728	-0.6614
0.99518	-0.000724792	-0.06589	0.99644	-0.00141	-0.1284	0.99518	-0.00354	-0.32149	0.99518	-0.00727	-0.66057	1.00176	-0.0074	-0.67277
0.99503	-0.000845337	-0.07685	0.99649	-0.00165	-0.14981	0.99503	-0.00364	-0.3312	0.99503	-0.00706	-0.64142	1.00157	-0.00735	-0.66806
0.99487	-0.000686951	-0.06245	0.99623	-0.00152	-0.13836	0.99487	-0.00334	-0.30321	0.99487	-0.00701	-0.63754	1.00143	-0.00737	-0.66972
0.99472	-0.000903625	-0.08215	0.99586	-0.00128	-0.11644	0.99472	-0.00376	-0.34166	0.99472	-0.00705	-0.64059	1.00123	-0.00731	-0.66473
0.99457	-0.000661316	-0.06012	0.99579	-0.00138	-0.12507	0.99457	-0.00348	-0.31669	0.99457	-0.00731	-0.66445	1.0011	-0.00734	-0.66723
0.99442	-0.000941467	-0.08559	0.99588	-0.00165	-0.14984	0.99442	-0.00347	-0.31533	0.99442	-0.00757	-0.68831	1.00101	-0.00741	-0.67361
0.99426	-0.000635986	-0.05782	0.99571	-0.00163	-0.14801	0.99426	-0.00379	-0.34465	0.99426	-0.00753	-0.68443	1.00083	-0.00738	-0.67083
0.99411	-0.000973816	-0.08853	0.9953	-0.00134	-0.12146	0.99411	-0.00336	-0.30551	0.99411	-0.00742	-0.67472	1.00083	-0.00755	-0.68609
0.99396	-0.00063324	-0.05757	0.99514	-0.00133	-0.12127	0.99396	-0.00369	-0.33572	0.99396	-0.00725	-0.65946	1.00083	-0.00772	-0.70163
0.9938	-0.000969849	-0.08817	0.99526	-0.00163	-0.1484	0.9938	-0.00368	-0.33492	0.9938	-0.00724	-0.65835	1.00084	-0.0079	-0.71855
0.99365	-0.000647888	-0.0589	0.99515	-0.00168	-0.15306	0.99365	-0.00341	-0.31034	0.99365	-0.00741	-0.67361	1.00077	-0.008	-0.72687
0.9935	-0.000975342	-0.08867	0.99477	-0.00142	-0.12948	0.9935	-0.00384	-0.34945	0.9935	-0.00756	-0.6872	1.00091	-0.00833	-0.75739
0.99335	-0.000671387	-0.06104	0.99455	-0.00135	-0.12265	0.99335	-0.00355	-0.32238	0.99335	-0.00768	-0.69774	1.00066	-0.00822	-0.74713
0.99319	-0.000944519	-0.08587	0.99462	-0.0016	-0.14554	0.99319	-0.00361	-0.3282	0.99319	-0.0077	-0.70024	1.00059	-0.00831	-0.75573
0.99304	-0.000720215	-0.06547	0.99461	-0.00176	-0.15975	0.99304	-0.00386	-0.35104	0.99304	-0.00746	-0.6786	1.00046	-0.00834	-0.75795
0.99289	-0.000906982	-0.08245	0.99426	-0.00154	-0.13966	0.99289	-0.00349	-0.31741	0.99289	-0.00732	-0.66528	1.00029	-0.00832	-0.756
0.99274	-0.000764465	-0.0695	0.99394	-0.00135	-0.12251	0.99274	-0.00383	-0.34804	0.99274	-0.00742	-0.67472	1.00006	-0.00822	-0.74768
0.99258	-0.000874329	-0.07948	0.99397	-0.00155	-0.14135	0.99258	-0.0037	-0.33636	0.99258	-0.00767	-0.69747	0.99993	-0.00825	-0.7499
0.99243	-0.000830383	-0.07549	0.99402	-0.00179	-0.1623	0.99243	-0.00357	-0.32465	0.99243	-0.00788	-0.71633	0.99982	-0.00831	-0.75517
0.99228	-0.000816956	-0.07427	0.99372	-0.00161	-0.14682	0.99228	-0.00392	-0.356	0.99228	-0.00795	-0.72299	0.9997	-0.00834	-0.7585
0.99213	-0.00089447	-0.08132	0.99337	-0.0014	-0.12701	0.99213	-0.00355	-0.32271	0.99213	-0.00784	-0.71245	0.99963	-0.00843	-0.76655
0.99197	-0.000776367	-0.07058	0.99333	-0.00153	-0.13874	0.99197	-0.00382	-0.34748	0.99197	-0.00769	-0.69941	0.99967	-0.00865	-0.78624
0.99182	-0.000941772	-0.08562	0.9934	-0.00177	-0.16135	0.99182	-0.00388	-0.35273	0.99182	-0.00767	-0.69747	0.99964	-0.00879	-0.79901
0.99167	-0.000744019	-0.06764	0.99319	-0.00171	-0.15561	0.99167	-0.00358	-0.32568	0.99167	-0.00777	-0.70607	0.99958	-0.00889	-0.80816
0.99152	-0.000990906	-0.09008	0.9928	-0.00144	-0.13125	0.99152	-0.00402	-0.36557	0.99152	-0.00797	-0.72493	0.99967	-0.00916	-0.83313
0.99136	-0.000720215	-0.06547	0.99267	-0.00146	-0.13303	0.99136	-0.00372	-0.33844	0.99136	-0.00808	-0.73464	0.99949	-0.00913	-0.8298
0.99121	-0.00103	-0.09399	0.9928	-0.00179	-0.16271	0.99121	-0.00374	-0.34027	0.99121	-0.00811	-0.73769	0.99941	-0.00921	-0.83701
0.99106	-0.000739441	-0.06722	0.99271	-0.00185	-0.16862	0.99106	-0.00409	-0.37184	0.99106	-0.00797	-0.72493	0.99933	-0.0093	-0.84534
0.99091	-0.00107	-0.09749	0.9923	-0.00156	-0.14196	0.99091	-0.00367	-0.3332	0.99091	-0.00775	-0.70412	0.99917	-0.00929	-0.84423
0.99075	-0.000736389	-0.06694	0.9921	-0.00152	-0.13788	0.99075	-0.004	-0.36385	0.99075	-0.00789	-0.71744	0.99891	-0.00916	-0.83285
0.9906	-0.00107	-0.09741	0.99219	-0.00179	-0.16258	0.9906	-0.00396	-0.35958	0.9906	-0.00807	-0.73353	0.99881	-0.00922	-0.83812
0.99045	-0.000741577	-0.06742	0.99212	-0.00188	-0.17129	0.99045	-0.00372	-0.3378	0.99045	-0.0083	-0.75434	0.99862	-0.00918	-0.83424
0.9903	-0.00105	-0.09558	0.99176	-0.00165	-0.1497	0.9903	-0.00412	-0.37481	0.9903	-0.0084	-0.76405	0.99858	-0.00931	-0.84617
0.99014	-0.000779724	-0.07088	0.99148	-0.0015	-0.13647	0.99014	-0.00381	-0.34679	0.99014	-0.00825	-0.74962	0.99846	-0.00935	-0.85005
0.98999	-0.000999451	-0.09086	0.99152	-0.00172	-0.1565	0.98999	-0.00392	-0.3567	0.98999	-0.00816	-0.74213	0.99852	-0.00959	-0.87142
0.98984	-0.000820618	-0.0746	0.99155	-0.00193	-0.17512	0.98984	-0.00411	-0.37365	0.98984	-0.00809	-0.73547	0.99847	-0.0097	-0.88224
0.98969	-0.000968018	-0.088	0.99122	-0.00173	-0.15708	0.98969	-0.00377	-0.34246	0.98969	-0.00815	-0.74074	0.99842	-0.00981	-0.89222
0.98953	-0.000868225	-0.07893	0.99088	-0.00151	-0.13766	0.98953	-0.00412	-0.37498	0.98953	-0.00843	-0.76655	0.99843	-0.01	-0.90887
0.98938	-0.000919189	-0.08356	0.99088	-0.00169	-0.15361	0.98938	-0.00393	-0.35742	0.98938	-0.00858	-0.77959	0.99831	-0.01003	-0.91192
0.98923	-0.000941772	-0.08562	0.99094	-0.00192	-0.17484	0.98923	-0.00386	-0.35106	0.98923	-0.00857	-0.77875	0.99827	-0.01016	-0.9233
0.98907	-0.000864258	-0.07857	0.99068	-0.00181	-0.1643	0.98907	-0.00418	-0.38039	0.98907	-0.00837	-0.76127	0.99812	-0.01017	-0.92413
0.98892	-0.000992126	-0.09019	0.99032	-0.00157	-0.14282	0.98892	-0.00377	-0.34302	0.98892	-0.00819	-0.74491	0.99796	-0.01016	-0.9233
0.98877	-0.000828552	-0.07532	0.99022	-0.00163	-0.14848	0.98877	-0.00408	-0.37115	0.98877	-0.00823	-0.74851	0.99768	-0.01002	-0.91053
0.98862	-0.00104	-0.09444	0.99032	-0.00192	-0.17434	0.98862	-0.00411	-0.37348	0.98862	-0.00839	-0.76294	0.99759	-0.01009	-0.91691
0.98846	-0.000794373	-0.07222	0.99017	-0.00191	-0.17401	0.98846	-0.00382	-0.34707	0.98846	-0.00862	-0.78375	0.99731	-0.00993	-0.90304
0.98831	-0.00108	-0.09799	0.98975	-0.00161	-0.1466	0.98831	-0.00426	-0.38755	0.98831	-0.0087	-0.79124	0.99737	-0.01018	-0.92524
0.98816	-0.000768433	-0.06986	0.98958	-0.0016	-0.14557	0.98816	-0.00396	-0.35961	0.98816	-0.00861	-0.78291	0.99721	-0.01017	-0.92496
0.98801	-0.0011	-0.1001	0.98969	-0.0019	-0.17229	0.98801	-0.00399	-0.36233	0.98801	-0.0085	-0.77237	0.99727	-0.0104	-0.94577
0.98785	-0.000768433	-0.06986	0.98959	-0.00196	-0.17781	0.98785	-0.00428	-0.38893	0.98785	-0.00845	-0.76821	0.99722	-0.01052	-0.95631
0.9877	-0.00109	-0.0994	0.98921	-0.0017	-0.15453	0.9877	-0.00385	-0.35001	0.9877	-0.00847	-0.76988	0.9972	-0.01068	-0.97074
0.98755	-0.000776367	-0.07058	0.98897	-0.0016	-0.14549	0.98755	-0.0042	-0.3815	0.98755	-0.00874	-0.79484	0.99716	-0.0108	-0.98183
0.9874	-0.0011	-0.10015	0.98904	-0.00184	-0.16754	0.9874	-0.00413	-0.37537	0.9874	-0.00899	-0.81759	0.99707	-0.01087	-0.98849
0.98724	-0.000802002	-0.07291	0.98903	-0.00201	-0.18272	0.98724	-0.00393	-0.35739	0.98724	-0.0089	-0.80899	0.99708	-0.01105	-1.00458
0.98709	-0.00107	-0.09721	0.98869	-0.0018	-0.16366	0.98709	-0.0043	-0.39118	0.98709	-0.00874	-0.79484	0.99688	-0.011	-0.99959
0.98694	-0.000855103	-0.07774	0.98837	-0.00161	-0.14604	0.98694	-0.00401	-0.36413	0.98694	-0.00858	-0.78042	0.99672	-0.01099	-0.99876
0.98679	-0.00104	-0.09411	0.98839	-0.00181	-0.16416	0.98679	-0.00416	-0.37775	0.98679	-0.00854	-0.77653	0.99647	-0.01088	-0.98905
0.98663	-0.000899048	-0.08173	0.98844	-0.00203	-0.18471	0.98663	-0.0043	-0.39049	0.98663	-0.00874	-0.79457	0.99636	-0.01093	-0.99404
0.98648	-0.000991821	-0.09017	0.98816	-0.00188	-0.17131	0.98648	-0.00397	-0.36058	0.98648	-0.00891	-0.8101	0.99603	-0.01073	-0.97573
0.98633	-0.000960693	-0.08734	0.98781	-0.00166	-0.15095	0.98633	-0.00437	-0.39759	0.98633	-0.00902	-0.81981	0.99612	-0.011	-0.99987
0.98618	-0.000941772	-0.08562	0.98774	-0.00176	-0.15988	0.98618	-0.00412	-0.3742	0.98618	-0.00897	-0.81565	0.99598	-0.01102	-1.00181
0.98602	-0.00102	-0.09252	0.98782	-0.00202	-0.18374	0.98602	-0.00406	-0.36943	0.98602	-0.00879	-0.79873	0.99597	-0.01118	-1.01651
0.98587	-0.000895996	-0.08145	0.98763	-0.00198	-0.18008	0.98587	-0.00439	-0.39903	0.98587	-0.00873	-0.79373	0.99593	-0.0113	-1.02733
0.98572	-0.00107	-0.09718	0.98723	-0.0017	-0.15431	0.98572	-0.00396	-0.3603	0.98572	-0.00876	-0.79679	0.99595	-0.0115	-1.04509
0.98557	-0.000856323	-0.07785	0.98708	-0.0017	-0.15447	0.98557	-0.00428	-0.38954	0.98557	-0.00901	-0.81926	0.9959	-0.01161	-1.05535
0.98541	-0.00111	-0.10085	0.9872	-0.00201	-0.18297	0.98541	-0.00429	-0.39015	0.98541	-0.00927	-0.84312	0.99578	-0.01165	-1.05924
0.98526	-0.000828552	-0.07532	0.98708	-0.00204	-0.18582	0.98526	-0.00401	-0.36446	0.98526	-0.00919	-0.83563	0.99577	-0.01181	-1.07366
0.98511	-0.00114	-0.10404	0.98669	-0.00177	-0.16124	0.98511	-0.00445	-0.40497	0.98511	-0.00909	-0.82647	0.99561	-0.0118	-1.07283
0.98495	-0.000815735	-0.07416	0.98648	-0.00172	-0.15617	0.98495	-0.00413	-0.37562	0.98495	-0.00891	-0.8101	0.99541	-0.01175	-1.06839
0.9848	-0.00115	-0.1042	0.98657	-0.00198	-0.18044	0.9848	-0.00421	-0.38258	0.9848	-0.00887	-0.80677	0.99521	-0.01169	-1.06312
0.98465	-0.000825806	-0.07507	0.98651	-0.00209	-0.19032	0.98465	-0.00446	-0.40561	0.98465	-0.00906	-0.82342	0.99509	-0.01173	-1.06645
0.9845	-0.00116	-0.10523	0.98617	-0.00187	-0.17043	0.9845	-0.00408	-0.37046	0.9845	-0.00919	-0.83563	0.99476	-0.01154	-1.04869
0.98434	-0.000844116	-0.07674	0.98586	-0.0017	-0.15475	0.98434	-0.00438	-0.39848	0.98434	-0.0093	-0.84589	0.99483	-0.01178	-1.07061
0.98419	-0.00114	-0.10379	0.9859	-0.00192	-0.17475	0.98419	-0.0043	-0.39087	0.98419	-0.00932	-0.84728	0.99471	-0.01181	-1.07394
0.98404	-0.000882874	-0.08026	0.98593	-0.00213	-0.19348	0.98404	-0.00413	-0.37578	0.98404	-0.00908	-0.82508	0.99463	-0.0119	-1.08226
0.98389	-0.0011	-0.0996	0.98562	-0.00195	-0.17745	0.98389	-0.00449	-0.40805	0.98389	-0.00895	-0.81371	0.99461	-0.01205	-1.0953
0.98373	-0.000926819	-0.08426	0.98527	-0.00173	-0.15736	0.98373	-0.00414	-0.37664	0.98373	-0.00903	-0.8212	0.99467	-0.01229	-1.11722
0.98358	-0.00107	-0.09688	0.98526	-0.00188	-0.17134	0.98358	-0.00437	-0.39751	0.98358	-0.00927	-0.84256	0.9946	-0.01238	-1.12582
0.98343	-0.00097168	-0.08833	0.98533	-0.00213	-0.1937	0.98343	-0.00445	-0.40483	0.98343	-0.00949	-0.86282	0.99452	-0.01247	-1.13331
0.98328	-0.00101	-0.09208	0.98509	-0.00204	-0.18544	0.98328	-0.00414	-0.37678	0.98328	-0.00954	-0.86753	0.99444	-0.01254	-1.13997
0.98312	-0.00105	-0.09502	0.98471	-0.00178	-0.16197	0.98312	-0.00458	-0.41607	0.98312	-0.00941	-0.85588	0.99432	-0.01258	-1.14358
0.98297	-0.000967712	-0.08797	0.9846	-0.00182	-0.16588	0.98297	-0.00429	-0.38988	0.98297	-0.00926	-0.84173	0.99408	-0.01248	-1.13442
0.98282	-0.0011	-0.10001	0.98471	-0.00213	-0.1934	0.98282	-0.00428	-0.38877	0.98282	-0.00922	-0.83812	0.99391	-0.01247	-1.13331
0.98267	-0.000925903	-0.08417	0.98456	-0.00213	-0.19379	0.98267	-0.0046	-0.41776	0.98267	-0.00934	-0.8495	0.99379	-0.0125	-1.13664
0.98251	-0.00115	-0.10434	0.98415	-0.00184	-0.16715	0.98251	-0.00416	-0.37809	0.98251	-0.00952	-0.86587	0.99352	-0.01236	-1.12388
0.98236	-0.00089447	-0.08132	0.98398	-0.00182	-0.16527	0.98236	-0.0045	-0.40869	0.98236	-0.00962	-0.87419	0.99348	-0.0125	-1.13609
0.98221	-0.00118	-0.10742	0.98407	-0.0021	-0.19057	0.98221	-0.00446	-0.40552	0.98221	-0.00965	-0.87752	0.99338	-0.01255	-1.1408
0.98206	-0.000870361	-0.07912	0.98399	-0.00218	-0.19789	0.98206	-0.00421	-0.38316	0.98206	-0.00943	-0.85699	0.99329	-0.01263	-1.14774
0.9819	-0.00121	-0.10995	0.98362	-0.00193	-0.17514	0.9819	-0.00463	-0.4212	0.9819	-0.00921	-0.83729	0.99327	-0.01277	-1.16078
0.98175	-0.000871887	-0.07926	0.98336	-0.0018	-0.16399	0.98175	-0.00432	-0.39301	0.98175	-0.00936	-0.85089	0.99336	-0.01304	-1.18547
0.9816	-0.00121	-0.11028	0.98341	-0.00204	-0.18508	0.9816	-0.0044	-0.40014	0.9816	-0.00955	-0.86781	0.99324	-0.01308	-1.18908
0.98145	-0.000879822	-0.07998	0.98343	-0.00223	-0.20241	0.98145	-0.00464	-0.42145	0.98145	-0.00976	-0.88723	0.99325	-0.01327	-1.20628
0.98129	-0.0012	-0.10886	0.98309	-0.00202	-0.18336	0.98129	-0.00428	-0.38868	0.98129	-0.00985	-0.89527	0.99307	-0.01323	-1.20267
0.98114	-0.000905151	-0.08229	0.98275	-0.00181	-0.16468	0.98114	-0.0046	-0.41817	0.98114	-0.0097	-0.8814	0.993	-0.01333	-1.21155
0.98099	-0.00117	-0.10617	0.98277	-0.002	-0.18183	0.98099	-0.00446	-0.40508	0.98099	-0.00959	-0.87197	0.99274	-0.0132	-1.20017
0.98083	-0.000969238	-0.08811	0.98282	-0.00223	-0.20269	0.98083	-0.00433	-0.39398	0.98083	-0.00954	-0.86753	0.9926	-0.01322	-1.20184
0.98068	-0.00114	-0.10323	0.98255	-0.0021	-0.19071	0.98068	-0.00467	-0.42486	0.98068	-0.00959	-0.87169	0.99243	-0.0132	-1.20045
0.98053	-0.001	-0.09114	0.98219	-0.00186	-0.16943	0.98053	-0.00428	-0.38921	0.98053	-0.00987	-0.89694	0.99224	-0.01316	-1.19629
0.98038	-0.0011	-0.09968	0.98212	-0.00195	-0.17758	0.98038	-0.00456	-0.41454	0.98038	-0.00997	-0.90609	0.99215	-0.01323	-1.20239
0.98022	-0.00107	-0.09702	0.98221	-0.00223	-0.20258	0.98022	-0.00461	-0.41934	0.98022	-0.00998	-0.9072	0.99198	-0.0132	-1.20045
0.98007	-0.00103	-0.09352	0.98204	-0.00221	-0.20075	0.98007	-0.00432	-0.39268	0.98007	-0.00977	-0.88862	0.99194	-0.01334	-1.21238
0.97992	-0.00113	-0.10271	0.98162	-0.00191	-0.17403	0.97992	-0.00477	-0.43335	0.97992	-0.00957	-0.87003	0.99188	-0.01344	-1.22209
0.97977	-0.000989685	-0.08997	0.98146	-0.0019	-0.17284	0.97977	-0.00446	-0.40522	0.97977	-0.00964	-0.87669	0.99196	-0.01371	-1.24595
0.97961	-0.00118	-0.10731	0.98158	-0.00221	-0.20089	0.97961	-0.00447	-0.40616	0.97961	-0.0098	-0.89084	0.99184	-0.01374	-1.24928
0.97946	-0.000961609	-0.08742	0.98146	-0.00225	-0.20441	0.97946	-0.00477	-0.43407	0.97946	-0.01004	-0.91248	0.99196	-0.01404	-1.27647
0.97931	-0.00122	-0.111	0.98108	-0.00198	-0.18039	0.97931	-0.00434	-0.39498	0.97931	-0.01011	-0.91886	0.99169	-0.01391	-1.26481
0.97916	-0.000931091	-0.08464	0.98085	-0.00191	-0.17323	0.97916	-0.00468	-0.42505	0.97916	-0.00999	-0.90831	0.99163	-0.01401	-1.27369
0.979	-0.00125	-0.11408	0.98093	-0.00216	-0.1967	0.979	-0.00463	-0.42059	0.979	-0.0099	-0.89971	0.99139	-0.01392	-1.26537
0.97885	-0.00089386	-0.08126	0.98088	-0.00228	-0.2076	0.97885	-0.00436	-0.39653	0.97885	-0.00979	-0.89028	0.99121	-0.01389	-1.26287
0.9787	-0.00123	-0.11219	0.98054	-0.00207	-0.18779	0.9787	-0.00477	-0.43329	0.9787	-0.00983	-0.89333	0.99101	-0.01383	-1.25705
0.97855	-0.000907593	-0.08251	0.98022	-0.00188	-0.17123	0.97855	-0.00447	-0.40638	0.97855	-0.0101	-0.91802	0.99084	-0.01382	-1.25594
0.97839	-0.00125	-0.11341	0.98026	-0.00209	-0.19029	0.97839	-0.00458	-0.41632	0.97839	-0.01032	-0.938	0.99075	-0.01389	-1.26232
0.97824	-0.000924683	-0.08406	0.9803	-0.00231	-0.20991	0.97824	-0.00477	-0.43318	0.97824	-0.01025	-0.93217	0.99054	-0.01382	-1.25677
0.97809	-0.00123	-0.11161	0.97999	-0.00214	-0.19459	0.97809	-0.00442	-0.40175	0.97809	-0.01006	-0.91442	0.99052	-0.01397	-1.26981
0.97794	-0.000983276	-0.08939	0.97964	-0.00192	-0.17431	0.97794	-0.00478	-0.43479	0.97794	-0.00991	-0.90082	0.99049	-0.01411	-1.28229
0.97778	-0.00119	-0.10778	0.97961	-0.00205	-0.18671	0.97778	-0.00458	-0.41629	0.97778	-0.00988	-0.8986	0.99052	-0.01431	-1.3006
0.97763	-0.00102	-0.09311	0.97968	-0.00231	-0.20974	0.97763	-0.00451	-0.41005	0.97763	-0.01005	-0.91331	0.99041	-0.01436	-1.30532
0.97748	-0.00115	-0.10484	0.97948	-0.00225	-0.20416	0.97748	-0.00484	-0.44001	0.97748	-0.01024	-0.93079	0.99055	-0.01469	-1.33501
0.97733	-0.00109	-0.09866	0.97908	-0.00197	-0.17939	0.97733	-0.00442	-0.40183	0.97733	-0.01031	-0.93744	0.99026	-0.01453	-1.32113
0.97717	-0.0011	-0.0999	0.97895	-0.002	-0.18188	0.97717	-0.00474	-0.43077	0.97717	-0.01027	-0.93328	0.99019	-0.01462	-1.32918
0.97702	-0.00115	-0.10445	0.97907	-0.00231	-0.20957	0.97702	-0.00476	-0.43316	0.97702	-0.01009	-0.91747	0.99001	-0.01459	-1.32668
0.97687	-0.00106	-0.09607	0.97893	-0.00232	-0.21079	0.97687	-0.00448	-0.40683	0.97687	-0.01005	-0.91359	0.98983	-0.01456	-1.32391
0.97672	-0.0012	-0.1092	0.97853	-0.00204	-0.18508	0.97672	-0.00491	-0.44639	0.97672	-0.01007	-0.91525	0.98959	-0.01447	-1.31531
0.97656	-0.00102	-0.09263	0.97835	-0.00201	-0.18263	0.97656	-0.00459	-0.41767	0.97656	-0.01033	-0.93883	0.98943	-0.01446	-1.3142
0.97641	-0.00122	-0.11081	0.9784	-0.00224	-0.20375	0.97641	-0.0046	-0.41848	0.97641	-0.01056	-0.95992	0.9893	-0.01448	-1.31642
0.97626	-0.000963745	-0.08761	0.97833	-0.00233	-0.21204	0.97626	-0.00488	-0.44323	0.97626	-0.01046	-0.95104	0.98913	-0.01446	-1.31448
0.9761	-0.00126	-0.1148	0.97798	-0.0021	-0.19121	0.9761	-0.00447	-0.40658	0.9761	-0.01034	-0.93994	0.98906	-0.01456	-1.32363
0.97595	-0.000949402	-0.08631	0.9777	-0.00196	-0.17814	0.97595	-0.00481	-0.43712	0.97595	-0.01016	-0.92357	0.98907	-0.01474	-1.34028
0.9758	-0.00129	-0.11719	0.97775	-0.00219	-0.19872	0.9758	-0.00474	-0.43055	0.9758	-0.01011	-0.91886	0.98904	-0.01488	-1.35248
0.97565	-0.000956116	-0.08692	0.97777	-0.00238	-0.21681	0.97565	-0.00454	-0.41257	0.97565	-0.01031	-0.93689	0.98896	-0.01496	-1.3597
0.97549	-0.00129	-0.11719	0.97745	-0.0022	-0.19986	0.97549	-0.0049	-0.44583	0.97549	-0.01044	-0.94882	0.98906	-0.01525	-1.38605
0.97534	-0.000966187	-0.08784	0.97711	-0.00198	-0.18019	0.97534	-0.00458	-0.41676	0.97534	-0.01054	-0.95853	0.98883	-0.01515	-1.37745
0.97519	-0.00129	-0.11744	0.97711	-0.00216	-0.19598	0.97519	-0.00475	-0.43213	0.97519	-0.01054	-0.95853	0.98872	-0.0152	-1.38217
0.97504	-0.00101	-0.09161	0.97717	-0.00239	-0.21751	0.97504	-0.00488	-0.444	0.97504	-0.01029	-0.93578	0.9886	-0.01523	-1.38494
0.97488	-0.00125	-0.11355	0.97692	-0.00228	-0.20749	0.97488	-0.00457	-0.41557	0.97488	-0.01021	-0.92857	0.98841	-0.01519	-1.38134
0.97473	-0.00106	-0.09621	0.97654	-0.00204	-0.18519	0.97473	-0.00498	-0.45249	0.97473	-0.01026	-0.93273	0.98813	-0.01505	-1.36857
0.97458	-0.00121	-0.11045	0.97644	-0.00209	-0.19029	0.97458	-0.00469	-0.42664	0.97458	-0.01049	-0.95326	0.988	-0.01508	-1.37079
0.97443	-0.0011	-0.09996	0.97655	-0.00239	-0.2169	0.97443	-0.00468	-0.42564	0.97443	-0.01073	-0.97518	0.98784	-0.01507	-1.36968
0.97427	-0.00118	-0.10703	0.9764	-0.00239	-0.21767	0.97427	-0.005	-0.45443	0.97427	-0.01073	-0.97573	0.98773	-0.01512	-1.37496
0.97412	-0.00117	-0.10667	0.97598	-0.00209	-0.18999	0.97412	-0.00457	-0.41518	0.97412	-0.01063	-0.96657	0.98762	-0.01516	-1.37856
0.97397	-0.00111	-0.10124	0.97581	-0.00207	-0.18815	0.97397	-0.00489	-0.44459	0.97397	-0.01044	-0.94882	0.98766	-0.01539	-1.39881
0.97382	-0.00122	-0.11131	0.97592	-0.00236	-0.21451	0.97382	-0.00489	-0.44417	0.97382	-0.01041	-0.94632	0.98759	-0.01548	-1.40714
0.97366	-0.00107	-0.09716	0.97582	-0.00242	-0.22028	0.97366	-0.00462	-0.42003	0.97366	-0.01054	-0.95825	0.98752	-0.01557	-1.41518
0.97351	-0.00127	-0.1155	0.97544	-0.00217	-0.19714	0.97351	-0.00506	-0.45971	0.97351	-0.01071	-0.97379	0.98755	-0.01577	-1.43405
0.97336	-0.00104	-0.09413	0.97519	-0.00206	-0.18754	0.97336	-0.00474	-0.4306	0.97336	-0.0108	-0.98156	0.9874	-0.01578	-1.43433
0.97321	-0.00131	-0.11907	0.97525	-0.0023	-0.20907	0.97321	-0.0048	-0.43643	0.97321	-0.01082	-0.98378	0.9873	-0.01584	-1.43987
0.97305	-0.00101	-0.09166	0.97526	-0.00248	-0.22536	0.97305	-0.00504	-0.4586	0.97305	-0.01058	-0.96214	0.98717	-0.01586	-1.44182
0.9729	-0.00134	-0.12179	0.97492	-0.00227	-0.20658	0.9729	-0.00467	-0.42467	0.9729	-0.01038	-0.94355	0.98698	-0.01582	-1.43849
0.97275	-0.00101	-0.09177	0.97459	-0.00207	-0.18849	0.97275	-0.00499	-0.45332	0.97275	-0.01052	-0.95659	0.98669	-0.01567	-1.42462
0.9726	-0.00134	-0.12224	0.97461	-0.00227	-0.2061	0.9726	-0.00488	-0.44386	0.9726	-0.01073	-0.97518	0.98658	-0.01571	-1.4285
0.97244	-0.001	-0.0913	0.97466	-0.00249	-0.22652	0.97244	-0.00473	-0.42994	0.97244	-0.01093	-0.99349	0.98632	-0.01559	-1.41768
0.97229	-0.00134	-0.12179	0.97438	-0.00235	-0.21326	0.97229	-0.00508	-0.46137	0.97229	-0.01102	-1.00209	0.98633	-0.01577	-1.43377
0.97214	-0.00103	-0.09372	0.97403	-0.00212	-0.19282	0.97214	-0.00471	-0.42863	0.97214	-0.01088	-0.98877	0.98616	-0.01576	-1.43266
0.97198	-0.00132	-0.11957	0.97396	-0.00222	-0.20158	0.97198	-0.00495	-0.45	0.97198	-0.01075	-0.97684	0.98621	-0.01598	-1.45264
0.97183	-0.00108	-0.09846	0.97405	-0.00249	-0.22616	0.97183	-0.00502	-0.45665	0.97183	-0.01069	-0.97185	0.98615	-0.01608	-1.46207
0.97168	-0.00127	-0.11544	0.97386	-0.00245	-0.22297	0.97168	-0.00473	-0.43024	0.97168	-0.01076	-0.9785	0.9861	-0.0162	-1.47289
0.97153	-0.00112	-0.10215	0.97345	-0.00216	-0.19634	0.97153	-0.00516	-0.46886	0.97153	-0.011	-0.99987	0.98605	-0.01632	-1.48343
0.97137	-0.00123	-0.11211	0.97329	-0.00215	-0.19573	0.97137	-0.00485	-0.44131	0.97137	-0.01108	-1.00763	0.98594	-0.01637	-1.48787
0.97122	-0.00117	-0.10656	0.97342	-0.00247	-0.22439	0.97122	-0.00486	-0.44142	0.97122	-0.0111	-1.00874	0.98591	-0.0165	-1.50036
0.97107	-0.00117	-0.10662	0.97329	-0.0025	-0.22694	0.97107	-0.00516	-0.46942	0.97107	-0.0109	-0.99071	0.98571	-0.01645	-1.49564
0.97092	-0.00124	-0.11289	0.97289	-0.00222	-0.2015	0.97092	-0.00474	-0.43063	0.97092	-0.01068	-0.97074	0.98554	-0.01643	-1.49397
0.97076	-0.00113	-0.10284	0.97269	-0.00216	-0.19637	0.97076	-0.00507	-0.46082	0.97076	-0.01078	-0.97989	0.98527	-0.01629	-1.48121
0.97061	-0.00128	-0.11652	0.97276	-0.00242	-0.21975	0.97061	-0.00503	-0.45721	0.97061	-0.01094	-0.99432	0.98516	-0.01635	-1.48593
0.97046	-0.00109	-0.09929	0.97272	-0.00255	-0.23141	0.97046	-0.00478	-0.43468	0.97046	-0.01117	-1.01513	0.98482	-0.01613	-1.46651
0.97031	-0.00134	-0.12152	0.97237	-0.00232	-0.21124	0.97031	-0.00521	-0.47385	0.97031	-0.01124	-1.02206	0.98488	-0.01638	-1.48898
0.97015	-0.00106	-0.0966	0.97207	-0.00215	-0.19534	0.97015	-0.00488	-0.44378	0.97015	-0.01111	-1.00958	0.98472	-0.01637	-1.48815
0.97	-0.00137	-0.1249	0.9721	-0.00236	-0.21471	0.97	-0.00497	-0.45194	0.97	-0.01101	-1.00098	0.98473	-0.01654	-1.50396
0.96985	-0.00105	-0.09513	0.97214	-0.00258	-0.23438	0.96985	-0.00518	-0.47136	0.96985	-0.01093	-0.99404	0.98466	-0.01664	-1.51284
0.9697	-0.00138	-0.12551	0.97183	-0.0024	-0.21801	0.9697	-0.00483	-0.43931	0.9697	-0.01096	-0.99598	0.98466	-0.01681	-1.5281
0.96954	-0.00105	-0.09541	0.97149	-0.00219	-0.19897	0.96954	-0.00517	-0.47025	0.96954	-0.01124	-1.02178	0.98459	-0.0169	-1.53642
0.96939	-0.00138	-0.12554	0.97145	-0.00232	-0.21068	0.96939	-0.00499	-0.4536	0.96939	-0.01142	-1.03815	0.98447	-0.01694	-1.53975
0.96924	-0.00106	-0.0961	0.97151	-0.00256	-0.23249	0.96924	-0.00489	-0.44478	0.96924	-0.01137	-1.03344	0.98446	-0.01711	-1.55501
0.96909	-0.00141	-0.12851	0.97134	-0.00253	-0.23038	0.96909	-0.00529	-0.48135	0.96909	-0.01123	-1.02123	0.98431	-0.0171	-1.55473
0.96893	-0.00115	-0.10456	0.97096	-0.00227	-0.20655	0.96893	-0.00489	-0.44472	0.96893	-0.01106	-1.00514	0.98411	-0.01705	-1.55002
0.96878	-0.00136	-0.12379	0.97082	-0.0023	-0.20871	0.96878	-0.00518	-0.47053	0.96878	-0.01105	-1.00458	0.98389	-0.01698	-1.54336
0.96863	-0.00118	-0.10759	0.97094	-0.0026	-0.23648	0.96863	-0.00522	-0.47413	0.96863	-0.0112	-1.01845	0.98376	-0.017	-1.5453
0.96848	-0.00132	-0.12032	0.9708	-0.00261	-0.23732	0.96848	-0.00491	-0.44639	0.96848	-0.01141	-1.03732	0.9834	-0.01677	-1.52477
0.96832	-0.00121	-0.11042	0.97038	-0.00231	-0.20993	0.96832	-0.00536	-0.48773	0.96832	-0.01148	-1.04342	0.98345	-0.017	-1.54558
0.96817	-0.00127	-0.11525	0.9702	-0.00228	-0.20705	0.96817	-0.00504	-0.45804	0.96817	-0.01141	-1.03704	0.98333	-0.01703	-1.54835
0.96802	-0.00128	-0.11674	0.97029	-0.00255	-0.23224	0.96802	-0.00507	-0.46082	0.96802	-0.01125	-1.02317	0.98325	-0.01712	-1.55612
0.96786	-0.00121	-0.1097	0.9702	-0.00262	-0.23837	0.96786	-0.00536	-0.48717	0.96786	-0.01121	-1.01929	0.98321	-0.01724	-1.56694
0.96771	-0.00132	-0.12032	0.96983	-0.00238	-0.21656	0.96771	-0.00492	-0.44728	0.96771	-0.01122	-1.01984	0.98324	-0.01745	-1.58636
0.96756	-0.00116	-0.10576	0.96956	-0.00224	-0.20405	0.96756	-0.00526	-0.47802	0.96756	-0.01147	-1.04287	0.98317	-0.01754	-1.5944
0.96741	-0.00137	-0.12462	0.96961	-0.00248	-0.22508	0.96741	-0.0052	-0.47275	0.96741	-0.01174	-1.06701	0.98306	-0.01758	-1.59857
0.96725	-0.00113	-0.10248	0.96963	-0.00267	-0.24286	0.96725	-0.00497	-0.45194	0.96725	-0.01161	-1.05535	0.98299	-0.01768	-1.60689
0.9671	-0.00141	-0.12773	0.9693	-0.00247	-0.22447	0.9671	-0.00536	-0.48689	0.9671	-0.01147	-1.04287	0.98284	-0.01769	-1.608
0.96695	-0.0011	-0.09963	0.96895	-0.00225	-0.2043	0.96695	-0.00504	-0.45832	0.96695	-0.0113	-1.02706	0.9826	-0.01758	-1.59857
0.9668	-0.00143	-0.13042	0.96896	-0.00243	-0.22125	0.9668	-0.00517	-0.47025	0.9668	-0.01124	-1.02206	0.98242	-0.01755	-1.59551
0.96664	-0.0011	-0.0996	0.96901	-0.00266	-0.24175	0.96664	-0.00533	-0.48467	0.96664	-0.01141	-1.0376	0.98227	-0.01756	-1.59635
0.96649	-0.00143	-0.12995	0.96875	-0.00253	-0.23038	0.96649	-0.005	-0.45499	0.96649	-0.01157	-1.05147	0.98198	-0.0174	-1.58164
0.96634	-0.00109	-0.09932	0.96838	-0.00229	-0.20846	0.96634	-0.00538	-0.48911	0.96634	-0.01167	-1.06062	0.98195	-0.01754	-1.59468
0.96619	-0.00142	-0.12906	0.9683	-0.00237	-0.21581	0.96619	-0.00514	-0.46747	0.96619	-0.01165	-1.05924	0.98183	-0.01758	-1.59829
0.96603	-0.00112	-0.10187	0.96839	-0.00264	-0.24037	0.96603	-0.00509	-0.46303	0.96603	-0.01141	-1.0376	0.98173	-0.01763	-1.60301
0.96588	-0.00139	-0.12607	0.96822	-0.00263	-0.23929	0.96588	-0.0054	-0.49078	0.96588	-0.01133	-1.03011	0.98169	-0.01776	-1.61493
0.96573	-0.00117	-0.10642	0.96781	-0.00234	-0.21276	0.96573	-0.00498	-0.45249	0.96573	-0.01137	-1.03344	0.98175	-0.018	-1.63602
0.96558	-0.00135	-0.12315	0.96764	-0.00232	-0.21121	0.96558	-0.0053	-0.48218	0.96558	-0.01161	-1.05535	0.98163	-0.01804	-1.64018
0.96542	-0.00122	-0.11053	0.96776	-0.00262	-0.23815	0.96542	-0.00531	-0.48246	0.96542	-0.01184	-1.07644	0.9816	-0.01817	-1.65211
0.96527	-0.00132	-0.11955	0.96764	-0.00266	-0.24198	0.96527	-0.00502	-0.4561	0.96527	-0.01182	-1.07477	0.98145	-0.01818	-1.65239
0.96512	-0.00127	-0.11588	0.96726	-0.0024	-0.21826	0.96512	-0.00547	-0.49716	0.96512	-0.01169	-1.06312	0.98135	-0.01824	-1.65794
0.96497	-0.00125	-0.11386	0.96703	-0.00232	-0.2109	0.96497	-0.00515	-0.46775	0.96497	-0.0115	-1.04537	0.98107	-0.01809	-1.64462
0.96481	-0.00133	-0.12079	0.96709	-0.00256	-0.23257	0.96481	-0.0052	-0.47275	0.96481	-0.01148	-1.04342	0.9809	-0.01808	-1.64351
0.96466	-0.00121	-0.10995	0.96707	-0.00271	-0.24636	0.96466	-0.00546	-0.4966	0.96466	-0.01164	-1.05841	0.98076	-0.01808	-1.64407
0.96451	-0.00138	-0.12501	0.96673	-0.0025	-0.22733	0.96451	-0.00505	-0.45943	0.96451	-0.01177	-1.07006	0.98052	-0.01799	-1.63519
0.96436	-0.00117	-0.10642	0.96641	-0.00231	-0.20974	0.96436	-0.00537	-0.48828	0.96436	-0.01187	-1.07866	0.98042	-0.01805	-1.64101
0.9642	-0.00142	-0.1292	0.96643	-0.0025	-0.22736	0.9642	-0.00529	-0.48135	0.9642	-0.01187	-1.07949	0.98025	-0.01804	-1.63963
0.96405	-0.00114	-0.10345	0.96648	-0.00273	-0.24786	0.96405	-0.0051	-0.46359	0.96405	-0.01164	-1.05841	0.9802	-0.01815	-1.64961
0.9639	-0.00145	-0.13181	0.96618	-0.00256	-0.23302	0.9639	-0.00546	-0.49605	0.9639	-0.01145	-1.04093	0.98013	-0.01823	-1.65766
0.96375	-0.00112	-0.10168	0.96583	-0.00234	-0.2131	0.96375	-0.00513	-0.46664	0.96375	-0.01157	-1.05175	0.9802	-0.01849	-1.68069
0.96359	-0.00146	-0.13289	0.96578	-0.00246	-0.22378	0.96359	-0.00531	-0.48301	0.96359	-0.01177	-1.07006	0.98008	-0.01853	-1.68429
0.96344	-0.00113	-0.10268	0.96586	-0.00271	-0.24669	0.96344	-0.00543	-0.49328	0.96344	-0.01197	-1.08837	0.98015	-0.01877	-1.70649
0.96329	-0.00146	-0.13297	0.96565	-0.00266	-0.24162	0.96329	-0.00511	-0.46442	0.96329	-0.01205	-1.09558	0.97988	-0.01864	-1.69456
0.96313	-0.00114	-0.10406	0.96525	-0.00238	-0.21634	0.96313	-0.00553	-0.50299	0.96313	-0.0119	-1.08199	0.97981	-0.01873	-1.70316
0.96298	-0.00144	-0.13106	0.96511	-0.00239	-0.21726	0.96298	-0.00524	-0.47663	0.96298	-0.01177	-1.06978	0.97954	-0.0186	-1.69095
0.96283	-0.00118	-0.1077	0.96523	-0.0027	-0.24503	0.96283	-0.00523	-0.47524	0.96283	-0.01171	-1.06479	0.97937	-0.01859	-1.68956
0.96268	-0.00139	-0.12676	0.9651	-0.00272	-0.24769	0.96268	-0.00553	-0.50299	0.96268	-0.01179	-1.072	0.97918	-0.01854	-1.68568
0.96252	-0.00123	-0.11164	0.9647	-0.00244	-0.22211	0.96252	-0.0051	-0.46387	0.96252	-0.01201	-1.0917	0.97901	-0.01852	-1.68374
0.96237	-0.00137	-0.12448	0.9645	-0.00239	-0.21701	0.96237	-0.00544	-0.49411	0.96237	-0.01208	-1.09836	0.97889	-0.01855	-1.68679
0.96222	-0.00128	-0.11672	0.96458	-0.00265	-0.24081	0.96222	-0.00541	-0.49189	0.96222	-0.01211	-1.10057	0.97867	-0.01848	-1.68013
0.96207	-0.00131	-0.11927	0.96452	-0.00276	-0.2506	0.96207	-0.00514	-0.4672	0.96207	-0.01189	-1.08088	0.97864	-0.01862	-1.69317
0.96191	-0.00135	-0.12263	0.96416	-0.00253	-0.22966	0.96191	-0.00558	-0.50687	0.96191	-0.01166	-1.05979	0.97859	-0.01874	-1.70371
0.96176	-0.00126	-0.11411	0.96386	-0.00235	-0.2139	0.96176	-0.00525	-0.47718	0.96176	-0.0118	-1.07255	0.97861	-0.01893	-1.72119
0.96161	-0.00139	-0.12632	0.9639	-0.00258	-0.23449	0.96161	-0.00532	-0.48356	0.96161	-0.01194	-1.08532	0.97849	-0.01897	-1.7248
0.96146	-0.00122	-0.11056	0.96394	-0.00279	-0.2538	0.96146	-0.00555	-0.50437	0.96146	-0.01216	-1.10529	0.97862	-0.01928	-1.75282
0.9613	-0.00143	-0.13023	0.96362	-0.0026	-0.23637	0.9613	-0.00519	-0.47191	0.9613	-0.01223	-1.11223	0.97831	-0.0191	-1.73673
0.96115	-0.00118	-0.10745	0.96327	-0.00238	-0.2167	0.96115	-0.0055	-0.49993	0.96115	-0.01208	-1.09836	0.97822	-0.01918	-1.74394
0.961	-0.00147	-0.13406	0.96327	-0.00255	-0.23152	0.961	-0.00539	-0.48995	0.961	-0.01199	-1.09003	0.97801	-0.01912	-1.73784
0.96085	-0.00116	-0.10501	0.96332	-0.00278	-0.25274	0.96085	-0.00523	-0.4758	0.96085	-0.01192	-1.08337	0.97783	-0.01908	-1.73451
0.96069	-0.0015	-0.13594	0.96308	-0.00268	-0.24336	0.96069	-0.00559	-0.50798	0.96069	-0.01194	-1.08559	0.97759	-0.01899	-1.72619
0.96054	-0.00116	-0.10537	0.9627	-0.00242	-0.22045	0.96054	-0.0052	-0.47302	0.96054	-0.01221	-1.11001	0.97742	-0.01897	-1.72424
0.96039	-0.00149	-0.13558	0.96259	-0.00248	-0.22508	0.96039	-0.00547	-0.49744	0.96039	-0.01236	-1.12388	0.97731	-0.01902	-1.72868
0.96024	-0.00117	-0.10609	0.9627	-0.00276	-0.25124	0.96024	-0.00552	-0.50215	0.96024	-0.01233	-1.1211	0.97711	-0.01896	-1.72369
0.96008	-0.00149	-0.13508	0.96255	-0.00277	-0.25188	0.96008	-0.00523	-0.47552	0.96008	-0.01213	-1.10279	0.97706	-0.01908	-1.73451
0.95993	-0.00119	-0.10859	0.96213	-0.00247	-0.22458	0.95993	-0.00566	-0.51436	0.95993	-0.01195	-1.08615	0.97704	-0.01922	-1.74727
0.95978	-0.00145	-0.13139	0.96196	-0.00245	-0.22261	0.95978	-0.00534	-0.48578	0.95978	-0.01196	-1.08698	0.977	-0.01935	-1.75948
0.95963	-0.00125	-0.11344	0.96206	-0.00273	-0.24858	0.95963	-0.00536	-0.48689	0.95963	-0.01212	-1.10141	0.9769	-0.01941	-1.76419
0.95947	-0.00142	-0.12881	0.96197	-0.0028	-0.25466	0.95947	-0.00566	-0.51491	0.95947	-0.01233	-1.12055	0.97701	-0.0197	-1.7911
0.95932	-0.00123	-0.11203	0.96154	-0.0025	-0.22686	0.95932	-0.00516	-0.46886	0.95932	-0.01232	-1.12027	0.97669	-0.01951	-1.7739
0.95917	-0.00132	-0.12024	0.96129	-0.00238	-0.21681	0.95917	-0.0055	-0.49993	0.95917	-0.01223	-1.11139	0.97657	-0.01955	-1.77751
0.95901	-0.00131	-0.11946	0.96135	-0.00262	-0.23829	0.95901	-0.00545	-0.49549	0.95901	-0.0121	-1.09974	0.97642	-0.01956	-1.77807
0.95886	-0.00128	-0.11649	0.96136	-0.00281	-0.25552	0.95886	-0.00521	-0.47385	0.95886	-0.01205	-1.09558	0.97623	-0.01952	-1.77418
0.95871	-0.00138	-0.12545	0.96103	-0.0026	-0.23662	0.95871	-0.00562	-0.51103	0.95871	-0.01205	-1.09558	0.97594	-0.01936	-1.75975
0.95856	-0.00125	-0.11341	0.96069	-0.0024	-0.21815	0.95856	-0.00532	-0.48356	0.95856	-0.01232	-1.11972	0.97579	-0.01936	-1.76003
0.9584	-0.00144	-0.1305	0.96072	-0.0026	-0.23632	0.9584	-0.00542	-0.49244	0.9584	-0.01257	-1.14247	0.97564	-0.01936	-1.76031
0.95825	-0.00122	-0.1107	0.96076	-0.00282	-0.25646	0.95825	-0.00562	-0.51103	0.95825	-0.01245	-1.13165	0.97551	-0.01939	-1.76281
0.9581	-0.00148	-0.13444	0.96049	-0.00268	-0.24389	0.9581	-0.00527	-0.47913	0.9581	-0.0123	-1.11833	0.9754	-0.01944	-1.76752
0.95795	-0.00119	-0.10789	0.96013	-0.00245	-0.223	0.95795	-0.00562	-0.51048	0.95795	-0.01212	-1.10224	0.97542	-0.01963	-1.78472
0.95779	-0.00151	-0.13755	0.96006	-0.00255	-0.23155	0.95779	-0.00542	-0.49272	0.95779	-0.01206	-1.09669	0.97535	-0.01972	-1.79277
0.95764	-0.00118	-0.10726	0.96015	-0.00282	-0.25599	0.95764	-0.00534	-0.48523	0.95764	-0.01225	-1.11389	0.97526	-0.01979	-1.79943
0.95749	-0.00151	-0.1373	0.95997	-0.00279	-0.25355	0.95749	-0.00566	-0.51464	0.95749	-0.0124	-1.12721	0.97529	-0.02	-1.81829
0.95734	-0.00119	-0.10789	0.95956	-0.00249	-0.22669	0.95734	-0.00526	-0.47829	0.95734	-0.0125	-1.13636	0.9751	-0.01996	-1.81496
0.95718	-0.00152	-0.13827	0.9594	-0.00249	-0.22661	0.95718	-0.00557	-0.50631	0.95718	-0.01246	-1.13248	0.975	-0.02002	-1.81996
0.95703	-0.00121	-0.10992	0.95952	-0.00279	-0.25396	0.95703	-0.0056	-0.50937	0.95703	-0.01226	-1.11417	0.97486	-0.02003	-1.82079
0.95688	-0.00149	-0.13533	0.95939	-0.00283	-0.25687	0.95688	-0.00529	-0.48107	0.95688	-0.01218	-1.10751	0.97466	-0.01998	-1.81663
0.95673	-0.00125	-0.11397	0.959	-0.00255	-0.23224	0.95673	-0.00574	-0.52213	0.95673	-0.01219	-1.10834	0.97435	-0.01981	-1.80054
0.95657	-0.00144	-0.13114	0.95879	-0.00249	-0.22638	0.95657	-0.00543	-0.49355	0.95657	-0.01244	-1.13081	0.97424	-0.01985	-1.80414
0.95642	-0.00129	-0.11749	0.95886	-0.00274	-0.24908	0.95642	-0.00546	-0.49605	0.95642	-0.01269	-1.15356	0.97398	-0.01973	-1.79388
0.95627	-0.00141	-0.12851	0.95883	-0.00288	-0.26145	0.95627	-0.00574	-0.52157	0.95627	-0.01262	-1.14746	0.97395	-0.01987	-1.80636
0.95612	-0.00135	-0.12282	0.95848	-0.00266	-0.24189	0.95612	-0.00532	-0.48329	0.95612	-0.01251	-1.13692	0.97379	-0.01986	-1.80525
0.95596	-0.00135	-0.12282	0.95817	-0.00248	-0.22528	0.95596	-0.00565	-0.51381	0.95596	-0.01231	-1.11944	0.97383	-0.02008	-1.82523
0.95581	-0.00141	-0.12815	0.9582	-0.00269	-0.24411	0.95581	-0.00559	-0.50826	0.95581	-0.01228	-1.11639	0.97374	-0.02015	-1.83161
0.95566	-0.00131	-0.11891	0.95824	-0.00291	-0.26412	0.95566	-0.00536	-0.48717	0.95566	-0.01244	-1.13109	0.97368	-0.02025	-1.84076
0.95551	-0.00146	-0.13236	0.95793	-0.00273	-0.24816	0.95551	-0.00574	-0.52213	0.95551	-0.01257	-1.14247	0.97364	-0.02038	-1.85242
0.95535	-0.00127	-0.11505	0.95758	-0.0025	-0.22763	0.95535	-0.00544	-0.49494	0.95535	-0.01265	-1.14968	0.97351	-0.0204	-1.85464
0.9552	-0.0015	-0.13655	0.95755	-0.00264	-0.23973	0.9552	-0.00557	-0.50659	0.9552	-0.01267	-1.15162	0.97347	-0.02053	-1.86657
0.95505	-0.00124	-0.11239	0.95761	-0.00288	-0.26217	0.95505	-0.00573	-0.5213	0.95505	-0.01242	-1.12915	0.97326	-0.02047	-1.86074
0.9549	-0.00154	-0.13974	0.9574	-0.00282	-0.25599	0.9549	-0.00539	-0.49022	0.9549	-0.01226	-1.11417	0.97309	-0.02044	-1.85824
0.95474	-0.00121	-0.11028	0.95701	-0.00254	-0.2313	0.95474	-0.00579	-0.52601	0.95474	-0.01235	-1.12249	0.97279	-0.02028	-1.84326
0.95459	-0.00155	-0.14132	0.95688	-0.00257	-0.23393	0.95459	-0.00554	-0.50326	0.95459	-0.01258	-1.14358	0.97267	-0.02031	-1.84659
0.95444	-0.00123	-0.11144	0.95699	-0.00287	-0.26112	0.95444	-0.00549	-0.4991	0.95444	-0.01278	-1.16189	0.97234	-0.02011	-1.82828
0.95428	-0.00156	-0.14166	0.95685	-0.00289	-0.26248	0.95428	-0.0058	-0.52768	0.95428	-0.01283	-1.16633	0.97238	-0.02033	-1.84853
0.95413	-0.00123	-0.11186	0.95645	-0.0026	-0.23654	0.95413	-0.00538	-0.48939	0.95413	-0.01269	-1.15329	0.9722	-0.0203	-1.84576
0.95398	-0.00154	-0.14005	0.95626	-0.00257	-0.23343	0.95398	-0.0057	-0.51824	0.95398	-0.01254	-1.13969	0.97222	-0.02049	-1.86268
0.95383	-0.00126	-0.11488	0.95634	-0.00282	-0.25679	0.95383	-0.0057	-0.51824	0.95383	-0.01248	-1.13498	0.97214	-0.02057	-1.87045
0.95367	-0.0015	-0.13633	0.95628	-0.00293	-0.26614	0.95367	-0.00541	-0.49189	0.95367	-0.01258	-1.1433	0.97211	-0.02071	-1.88293
0.95352	-0.00132	-0.11957	0.95591	-0.00268	-0.24397	0.95352	-0.00586	-0.53295	0.95352	-0.01277	-1.16078	0.97203	-0.0208	-1.8907
0.95337	-0.00147	-0.13339	0.95563	-0.00254	-0.23091	0.95337	-0.00555	-0.50409	0.95337	-0.01284	-1.16744	0.9719	-0.02083	-1.8932
0.95322	-0.00135	-0.12263	0.95568	-0.00277	-0.25144	0.95322	-0.00559	-0.50826	0.95322	-0.01287	-1.16993	0.97188	-0.02097	-1.90679
0.95306	-0.00142	-0.12873	0.9557	-0.00296	-0.26903	0.95306	-0.00584	-0.53128	0.95306	-0.01265	-1.15024	0.97167	-0.02091	-1.90069
0.95291	-0.00142	-0.12909	0.95537	-0.00277	-0.25158	0.95291	-0.00545	-0.49549	0.95291	-0.01241	-1.12776	0.97147	-0.02085	-1.89542
0.95276	-0.00136	-0.12354	0.95503	-0.00255	-0.23157	0.95276	-0.00577	-0.5249	0.95276	-0.01256	-1.14163	0.97121	-0.02073	-1.88488
0.95261	-0.00148	-0.13417	0.95503	-0.00272	-0.24769	0.95261	-0.00568	-0.51658	0.95261	-0.01273	-1.15773	0.97109	-0.02077	-1.88793
0.95245	-0.00132	-0.11974	0.95509	-0.00296	-0.269	0.95245	-0.00549	-0.4991	0.95245	-0.01292	-1.17465	0.97072	-0.02052	-1.86573
0.9523	-0.00152	-0.13813	0.95483	-0.00284	-0.25798	0.9523	-0.00585	-0.53212	0.9523	-0.01301	-1.18297	0.97077	-0.02075	-1.88654
0.95215	-0.00128	-0.11652	0.95446	-0.00259	-0.23585	0.95215	-0.00553	-0.50299	0.95215	-0.01285	-1.16855	0.97061	-0.02075	-1.88626
0.952	-0.00161	-0.14623	0.95441	-0.00271	-0.24664	0.952	-0.00577	-0.5249	0.952	-0.0128	-1.16327	0.97061	-0.02092	-1.90152
0.95184	-0.00129	-0.11708	0.9545	-0.00299	-0.27172	0.95184	-0.00587	-0.53378	0.95184	-0.01272	-1.15606	0.97055	-0.02102	-1.91123
0.95169	-0.00161	-0.14651	0.95435	-0.00298	-0.27116	0.95169	-0.00555	-0.50465	0.95169	-0.01276	-1.15995	0.97056	-0.0212	-1.9276
0.95154	-0.00127	-0.11569	0.95391	-0.00267	-0.24253	0.95154	-0.00598	-0.54321	0.95154	-0.01303	-1.18464	0.97048	-0.02129	-1.93509
0.95139	-0.0016	-0.1459	0.95374	-0.00265	-0.24062	0.95139	-0.00567	-0.51575	0.95139	-0.01315	-1.19518	0.97035	-0.02131	-1.93759
0.95123	-0.00127	-0.11569	0.95385	-0.00294	-0.26725	0.95123	-0.00566	-0.51436	0.95123	-0.01313	-1.19324	0.97029	-0.02142	-1.94702
0.95108	-0.0016	-0.14507	0.95375	-0.003	-0.27233	0.95108	-0.00596	-0.54183	0.95108	-0.01291	-1.17382	0.97012	-0.02139	-1.94452
0.95093	-0.00129	-0.11752	0.95337	-0.00274	-0.24908	0.95093	-0.00553	-0.50271	0.95093	-0.01272	-1.15634	0.96987	-0.02129	-1.93509
0.95078	-0.00156	-0.14138	0.95312	-0.00264	-0.23965	0.95078	-0.00586	-0.53239	0.95078	-0.01277	-1.1605	0.96968	-0.02124	-1.93121
0.95062	-0.00134	-0.12143	0.95318	-0.00287	-0.26109	0.95062	-0.00583	-0.53045	0.95062	-0.0129	-1.17271	0.96954	-0.02125	-1.93204
0.95047	-0.00152	-0.13777	0.95317	-0.00303	-0.27571	0.95047	-0.00556	-0.50576	0.95047	-0.01312	-1.19268	0.96919	-0.02104	-1.91262
0.95032	-0.00138	-0.12509	0.95283	-0.00282	-0.25632	0.95032	-0.00599	-0.54488	0.95032	-0.01317	-1.19712	0.96919	-0.02121	-1.92816
0.95016	-0.00148	-0.13411	0.9525	-0.00262	-0.23831	0.95016	-0.00567	-0.51547	0.95016	-0.01306	-1.18686	0.96907	-0.02124	-1.93065
0.95001	-0.00143	-0.12973	0.95252	-0.00281	-0.2559	0.95001	-0.00574	-0.52213	0.95001	-0.01294	-1.17659	0.96896	-0.02129	-1.93565
0.94986	-0.00141	-0.12787	0.95256	-0.00304	-0.2761	0.94986	-0.00598	-0.54349	0.94986	-0.01288	-1.17132	0.96889	-0.02139	-1.94425
0.94971	-0.00149	-0.13519	0.95228	-0.00289	-0.26242	0.94971	-0.00561	-0.50964	0.94971	-0.01289	-1.1716	0.96894	-0.02162	-1.96505
0.94955	-0.00137	-0.12423	0.95191	-0.00265	-0.24076	0.94955	-0.00592	-0.5385	0.94955	-0.01316	-1.19601	0.96884	-0.02167	-1.97033
0.9494	-0.00154	-0.13972	0.95186	-0.00276	-0.25072	0.9494	-0.00579	-0.52657	0.9494	-0.01339	-1.21682	0.96877	-0.02176	-1.97837
0.94925	-0.00132	-0.12018	0.95193	-0.00301	-0.27396	0.94925	-0.00564	-0.51297	0.94925	-0.01329	-1.20794	0.96863	-0.02177	-1.9792
0.9491	-0.00158	-0.14329	0.95174	-0.00297	-0.26958	0.9491	-0.00599	-0.5446	0.9491	-0.0131	-1.1913	0.96852	-0.02182	-1.98364
0.94894	-0.00129	-0.11741	0.95133	-0.00268	-0.24328	0.94894	-0.00561	-0.5102	0.94894	-0.01293	-1.1752	0.96822	-0.02166	-1.96894
0.94879	-0.00161	-0.14618	0.95118	-0.00269	-0.24428	0.94879	-0.00588	-0.53434	0.94879	-0.01287	-1.17021	0.96806	-0.02165	-1.96838
0.94864	-0.00127	-0.11574	0.9513	-0.00299	-0.27211	0.94864	-0.00593	-0.53905	0.94864	-0.01306	-1.18713	0.9679	-0.02164	-1.96727
0.94849	-0.00161	-0.14615	0.95117	-0.00302	-0.27438	0.94849	-0.00562	-0.51131	0.94849	-0.01322	-1.20212	0.96764	-0.02152	-1.95645
0.94833	-0.00128	-0.11666	0.95077	-0.00274	-0.24922	0.94833	-0.00606	-0.55098	0.94833	-0.0133	-1.20905	0.96755	-0.02159	-1.96256
0.94818	-0.00161	-0.14671	0.95057	-0.00269	-0.24411	0.94818	-0.00575	-0.52241	0.94818	-0.01325	-1.20489	0.96739	-0.02158	-1.962
0.94803	-0.00129	-0.11769	0.95065	-0.00295	-0.26786	0.94803	-0.00575	-0.52296	0.94803	-0.01305	-1.18658	0.9673	-0.02166	-1.96894
0.94788	-0.0016	-0.1454	0.95061	-0.00307	-0.27885	0.94788	-0.00605	-0.55015	0.94788	-0.01299	-1.18103	0.96724	-0.02176	-1.97809
0.94772	-0.00133	-0.12129	0.95025	-0.00284	-0.25785	0.94772	-0.00561	-0.5102	0.94772	-0.013	-1.18214	0.9673	-0.02199	-1.99946
0.94757	-0.00154	-0.14038	0.94994	-0.00266	-0.24223	0.94757	-0.00594	-0.54044	0.94757	-0.01324	-1.20406	0.96717	-0.02202	-2.00168
0.94742	-0.00138	-0.12545	0.94997	-0.00287	-0.26068	0.94742	-0.0059	-0.53628	0.94742	-0.01351	-1.22792	0.9672	-0.02223	-2.02054
0.94727	-0.00151	-0.13744	0.95001	-0.00308	-0.28023	0.94727	-0.00566	-0.51436	0.94727	-0.0134	-1.21793	0.96695	-0.02212	-2.01055
0.94711	-0.00142	-0.1292	0.94968	-0.00289	-0.26267	0.94711	-0.00605	-0.55015	0.94711	-0.01327	-1.20655	0.96686	-0.02219	-2.01749
0.94696	-0.00145	-0.13189	0.94934	-0.00267	-0.24267	0.94696	-0.00575	-0.52268	0.94696	-0.01309	-1.18963	0.96659	-0.02205	-2.00473
0.94681	-0.00149	-0.13555	0.94932	-0.00282	-0.25665	0.94681	-0.00583	-0.53045	0.94681	-0.01303	-1.18491	0.96641	-0.02202	-2.00195
0.94666	-0.0014	-0.12737	0.94938	-0.00306	-0.27838	0.94666	-0.00603	-0.54848	0.94666	-0.01321	-1.20101	0.96622	-0.02198	-1.99835
0.9465	-0.00154	-0.13996	0.94915	-0.00297	-0.26994	0.9465	-0.00569	-0.51713	0.9465	-0.01334	-1.21238	0.96602	-0.02193	-1.99363
0.94635	-0.00136	-0.12387	0.94877	-0.00272	-0.24697	0.94635	-0.00603	-0.54793	0.94635	-0.01343	-1.2207	0.96589	-0.02196	-1.9964
0.9462	-0.00158	-0.14357	0.94864	-0.00275	-0.24977	0.9462	-0.00584	-0.53073	0.9462	-0.01343	-1.2207	0.96568	-0.02189	-1.98975
0.94604	-0.00133	-0.12068	0.94876	-0.00305	-0.27718	0.94604	-0.00575	-0.52296	0.94604	-0.01317	-1.19712	0.96564	-0.02202	-2.0014
0.94589	-0.00162	-0.14751	0.94861	-0.00306	-0.2781	0.94589	-0.00608	-0.55237	0.94589	-0.01304	-1.18519	0.96557	-0.02211	-2.01028
0.94574	-0.00131	-0.11885	0.9482	-0.00276	-0.25094	0.94574	-0.00567	-0.51519	0.94574	-0.01311	-1.19185	0.96561	-0.02232	-2.02942
0.94559	-0.00164	-0.1487	0.94802	-0.00274	-0.24894	0.94559	-0.00596	-0.5421	0.94559	-0.01333	-1.2121	0.96547	-0.02234	-2.03108
0.94543	-0.00131	-0.11869	0.94811	-0.00301	-0.2733	0.94543	-0.00599	-0.54488	0.94543	-0.01354	-1.23097	0.96557	-0.02263	-2.05716
0.94528	-0.00164	-0.14879	0.94802	-0.00307	-0.27951	0.94528	-0.00569	-0.51741	0.94528	-0.01357	-1.23347	0.96525	-0.02243	-2.03941
0.94513	-0.00131	-0.11896	0.94765	-0.00284	-0.25782	0.94513	-0.00614	-0.55847	0.94513	-0.01343	-1.22126	0.96517	-0.02252	-2.04745
0.94498	-0.00163	-0.14782	0.94739	-0.00271	-0.24617	0.94498	-0.00582	-0.52934	0.94498	-0.01326	-1.20572	0.96493	-0.02242	-2.03857
0.94482	-0.00134	-0.12163	0.94744	-0.00294	-0.26717	0.94482	-0.00585	-0.53212	0.94482	-0.01324	-1.20322	0.96476	-0.0224	-2.03608
0.94467	-0.00159	-0.1441	0.94744	-0.00312	-0.28323	0.94467	-0.00613	-0.55764	0.94467	-0.01334	-1.21238	0.96452	-0.0223	-2.02748
0.94452	-0.00139	-0.12604	0.94712	-0.00292	-0.26561	0.94452	-0.0057	-0.51797	0.94452	-0.0135	-1.22708	0.96433	-0.02226	-2.02387
0.94437	-0.00154	-0.14041	0.94678	-0.00271	-0.24625	0.94437	-0.00604	-0.54904	0.94437	-0.01358	-1.23457	0.96422	-0.02231	-2.02775
0.94421	-0.00143	-0.12989	0.94678	-0.00289	-0.26253	0.94421	-0.00598	-0.54321	0.94421	-0.01359	-1.23568	0.96399	-0.02222	-2.02026
0.94406	-0.00151	-0.13689	0.94683	-0.00311	-0.28312	0.94406	-0.00575	-0.52268	0.94406	-0.01336	-1.2146	0.96394	-0.02234	-2.03053
0.94391	-0.00149	-0.1358	0.94657	-0.00299	-0.27141	0.94391	-0.00613	-0.55736	0.94391	-0.01313	-1.19351	0.9639	-0.02246	-2.04218
0.94376	-0.00145	-0.13159	0.9462	-0.00275	-0.24966	0.94376	-0.00582	-0.52879	0.94376	-0.01327	-1.20655	0.96388	-0.02262	-2.05605
0.9436	-0.00155	-0.14116	0.94612	-0.00283	-0.25724	0.9436	-0.00596	-0.54183	0.9436	-0.01345	-1.22237	0.96378	-0.02267	-2.06077
0.94345	-0.00141	-0.12801	0.94621	-0.0031	-0.28157	0.94345	-0.00611	-0.55514	0.94345	-0.01364	-1.2404	0.96388	-0.02296	-2.08712
0.9433	-0.0016	-0.14504	0.94604	-0.00308	-0.2796	0.9433	-0.00577	-0.52462	0.9433	-0.01374	-1.24872	0.96358	-0.02279	-2.07214
0.94315	-0.00136	-0.12346	0.94562	-0.00278	-0.25255	0.94315	-0.00616	-0.55958	0.94315	-0.01357	-1.23402	0.96346	-0.02282	-2.07492
0.94299	-0.00163	-0.14829	0.94546	-0.00277	-0.25227	0.94299	-0.00591	-0.53766	0.94299	-0.01345	-1.22292	0.96329	-0.02281	-2.07325
0.94284	-0.00133	-0.12132	0.94557	-0.00306	-0.27857	0.94284	-0.00586	-0.53295	0.94284	-0.01338	-1.21654	0.9631	-0.02276	-2.06937
0.94269	-0.00167	-0.15181	0.94546	-0.00311	-0.2827	0.94269	-0.00618	-0.56208	0.94269	-0.01342	-1.22043	0.96282	-0.02262	-2.05661
0.94254	-0.00133	-0.12121	0.94507	-0.00285	-0.25893	0.94254	-0.00575	-0.52268	0.94254	-0.01368	-1.24345	0.96265	-0.0226	-2.05439
0.94238	-0.00166	-0.15123	0.94485	-0.00277	-0.25152	0.94238	-0.00607	-0.55181	0.94238	-0.01378	-1.25233	0.96252	-0.02262	-2.05661
0.94223	-0.00132	-0.12029	0.9449	-0.003	-0.2728	0.94223	-0.00606	-0.55098	0.94223	-0.01377	-1.2515	0.96233	-0.02259	-2.05356
0.94208	-0.00166	-0.15095	0.94489	-0.00316	-0.287	0.94208	-0.00577	-0.5249	0.94208	-0.01357	-1.23319	0.96224	-0.02265	-2.0591
0.94193	-0.00134	-0.12188	0.94454	-0.00294	-0.26692	0.94193	-0.00622	-0.56541	0.94193	-0.01335	-1.21321	0.96224	-0.02282	-2.07464
0.94177	-0.00163	-0.14804	0.94422	-0.00274	-0.2495	0.94177	-0.0059	-0.53655	0.94177	-0.01341	-1.21932	0.96217	-0.02292	-2.08324
0.94162	-0.0014	-0.12698	0.94424	-0.00294	-0.26714	0.94162	-0.00595	-0.54072	0.94162	-0.01355	-1.23152	0.96207	-0.02297	-2.08851
0.94147	-0.00159	-0.14421	0.94429	-0.00317	-0.28811	0.94147	-0.0062	-0.56374	0.94147	-0.01377	-1.25205	0.96212	-0.0232	-2.10932
0.94131	-0.00143	-0.13023	0.94399	-0.003	-0.2731	0.94131	-0.0058	-0.52768	0.94131	-0.01382	-1.25677	0.9619	-0.02313	-2.10238
0.94116	-0.00155	-0.14085	0.94364	-0.00278	-0.25266	0.94116	-0.00612	-0.55625	0.94116	-0.01371	-1.24595	0.96178	-0.02317	-2.10599
0.94101	-0.00149	-0.13566	0.94359	-0.0029	-0.26326	0.94101	-0.00604	-0.54904	0.94101	-0.0136	-1.23624	0.96163	-0.02317	-2.10655
0.94086	-0.00148	-0.13483	0.94366	-0.00315	-0.28675	0.94086	-0.00585	-0.53184	0.94086	-0.01352	-1.22875	0.96142	-0.02311	-2.10072
0.9407	-0.00155	-0.14088	0.94345	-0.00309	-0.28062	0.9407	-0.00621	-0.56485	0.9407	-0.01353	-1.23014	0.96112	-0.02293	-2.08491
0.94055	-0.00145	-0.13136	0.94306	-0.00282	-0.25604	0.94055	-0.00588	-0.53434	0.94055	-0.01381	-1.2551	0.96098	-0.02295	-2.08629
0.9404	-0.0016	-0.14515	0.94291	-0.00282	-0.25668	0.9404	-0.00608	-0.55237	0.9404	-0.01401	-1.27369	0.96075	-0.02286	-2.07852
0.94025	-0.0014	-0.12737	0.94304	-0.00313	-0.28495	0.94025	-0.00617	-0.56125	0.94025	-0.01393	-1.26592	0.96068	-0.02296	-2.08712
0.94009	-0.00164	-0.14901	0.94291	-0.00316	-0.28717	0.94009	-0.00584	-0.53128	0.94009	-0.01373	-1.24845	0.96052	-0.02295	-2.08629
0.93994	-0.00137	-0.1241	0.9425	-0.00288	-0.26148	0.93994	-0.00627	-0.5704	0.93994	-0.01356	-1.23236	0.96055	-0.02316	-2.10544
0.93979	-0.00165	-0.14979	0.94227	-0.00279	-0.25391	0.93979	-0.00594	-0.54044	0.93979	-0.01349	-1.22597	0.96044	-0.0232	-2.10904
0.93964	-0.00132	-0.12024	0.94236	-0.00306	-0.27854	0.93964	-0.00593	-0.53877	0.93964	-0.01364	-1.24012	0.96035	-0.02327	-2.1157
0.93948	-0.00167	-0.15167	0.9423	-0.00316	-0.28728	0.93948	-0.00624	-0.56707	0.93948	-0.01382	-1.25649	0.96033	-0.02342	-2.12902
0.93933	-0.00134	-0.12171	0.94195	-0.00294	-0.26706	0.93933	-0.0058	-0.52712	0.93933	-0.01391	-1.26426	0.96018	-0.02343	-2.12957
0.93918	-0.00167	-0.15206	0.94165	-0.00277	-0.25199	0.93918	-0.00613	-0.55764	0.93918	-0.01382	-1.25677	0.96012	-0.02353	-2.13873
0.93903	-0.00135	-0.12249	0.94169	-0.00299	-0.27163	0.93903	-0.00611	-0.55514	0.93903	-0.01366	-1.24179	0.95991	-0.02346	-2.13318
0.93887	-0.00166	-0.15092	0.94172	-0.0032	-0.29078	0.93887	-0.00584	-0.53101	0.93887	-0.01361	-1.23707	0.95973	-0.02343	-2.1304
0.93872	-0.00139	-0.12634	0.94141	-0.00302	-0.27421	0.93872	-0.00628	-0.57123	0.93872	-0.01361	-1.23707	0.95941	-0.02325	-2.1132
0.93857	-0.00161	-0.14654	0.94105	-0.00279	-0.25366	0.93857	-0.00595	-0.54127	0.93857	-0.01384	-1.25843	0.95929	-0.02329	-2.11709
0.93842	-0.00144	-0.13053	0.94105	-0.00296	-0.26864	0.93842	-0.00602	-0.54765	0.93842	-0.01411	-1.28313	0.95895	-0.02307	-2.09739
0.93826	-0.00158	-0.1439	0.9411	-0.00319	-0.28978	0.93826	-0.00625	-0.56846	0.93826	-0.014	-1.27286	0.95899	-0.02329	-2.11709
0.93811	-0.00148	-0.13475	0.94086	-0.00309	-0.28071	0.93811	-0.00589	-0.53544	0.93811	-0.01387	-1.26121	0.9588	-0.02325	-2.11376
0.93796	-0.00153	-0.13919	0.94048	-0.00283	-0.2574	0.93796	-0.0062	-0.56374	0.93796	-0.01368	-1.24401	0.95882	-0.02344	-2.13068
0.93781	-0.00156	-0.14146	0.94038	-0.00289	-0.2627	0.93781	-0.00609	-0.5532	0.93781	-0.01362	-1.23818	0.95874	-0.02352	-2.13845
0.93765	-0.00148	-0.13464	0.94048	-0.00318	-0.28906	0.93765	-0.00594	-0.53961	0.93765	-0.0138	-1.25455	0.95868	-0.02363	-2.14788
0.9375	-0.0016	-0.14587	0.94034	-0.00319	-0.28964	0.9375	-0.00628	-0.57068	0.9375	-0.01393	-1.26592	0.95861	-0.02372	-2.15648
0.93735	-0.00141	-0.12845	0.93989	-0.00286	-0.2597	0.93735	-0.00588	-0.53461	0.93735	-0.014	-1.27286	0.95845	-0.02371	-2.1551
0.93719	-0.00163	-0.14823	0.93972	-0.00284	-0.2581	0.93719	-0.00615	-0.55875	0.93719	-0.01399	-1.27203	0.95843	-0.02386	-2.16924
0.93704	-0.00139	-0.12629	0.93982	-0.00312	-0.28404	0.93704	-0.00621	-0.5643	0.93704	-0.01375	-1.24983	0.9582	-0.02377	-2.1612
0.93689	-0.00167	-0.15206	0.93973	-0.00319	-0.28986	0.93689	-0.00589	-0.53544	0.93689	-0.01363	-1.23901	0.958	-0.02372	-2.15593
0.93674	-0.00136	-0.12362	0.93935	-0.00294	-0.26706	0.93674	-0.00633	-0.57567	0.93674	-0.01369	-1.24484	0.95774	-0.0236	-2.14511
0.93658	-0.0017	-0.1547	0.93911	-0.00283	-0.25749	0.93658	-0.00602	-0.54737	0.93658	-0.01391	-1.26481	0.9576	-0.02361	-2.1465
0.93643	-0.00137	-0.12429	0.93916	-0.00306	-0.27851	0.93643	-0.00602	-0.54737	0.93643	-0.01411	-1.28313	0.95723	-0.02337	-2.1243
0.93628	-0.0017	-0.1545	0.93916	-0.00324	-0.29422	0.93628	-0.00633	-0.57512	0.93628	-0.01413	-1.28424	0.95728	-0.0236	-2.14539
0.93613	-0.00137	-0.12457	0.93883	-0.00303	-0.2758	0.93613	-0.00589	-0.53572	0.93613	-0.014	-1.27231	0.95712	-0.02359	-2.14428
0.93597	-0.0017	-0.1542	0.93849	-0.00282	-0.25663	0.93597	-0.00623	-0.56624	0.93597	-0.01381	-1.2551	0.95706	-0.02369	-2.15399
0.93582	-0.0014	-0.12701	0.9385	-0.00301	-0.27388	0.93582	-0.00618	-0.56208	0.93582	-0.01377	-1.25178	0.95699	-0.02379	-2.16259
0.93567	-0.00166	-0.15062	0.93856	-0.00324	-0.2948	0.93567	-0.00594	-0.53961	0.93567	-0.0139	-1.26398	0.95698	-0.02395	-2.17729
0.93552	-0.00145	-0.13161	0.93827	-0.0031	-0.28168	0.93552	-0.00634	-0.57595	0.93552	-0.01404	-1.27591	0.95691	-0.02404	-2.18506
0.93536	-0.00162	-0.14751	0.93791	-0.00286	-0.26007	0.93536	-0.00603	-0.54821	0.93536	-0.01413	-1.28451	0.95676	-0.02404	-2.18561
0.93521	-0.00149	-0.13522	0.93784	-0.00296	-0.26878	0.93521	-0.00613	-0.55708	0.93521	-0.01414	-1.28507	0.95671	-0.02416	-2.19616
0.93506	-0.00158	-0.14382	0.93793	-0.00323	-0.29319	0.93506	-0.00632	-0.57429	0.93506	-0.01391	-1.26454	0.95652	-0.02411	-2.19227
0.93491	-0.00155	-0.14105	0.93775	-0.00319	-0.29003	0.93491	-0.00598	-0.54349	0.93491	-0.01367	-1.24318	0.95629	-0.02403	-2.1845
0.93475	-0.00152	-0.13797	0.93734	-0.0029	-0.26384	0.93475	-0.00631	-0.57345	0.93475	-0.01381	-1.25538	0.95607	-0.02395	-2.17729
0.9346	-0.0016	-0.14554	0.93718	-0.0029	-0.26345	0.9346	-0.00613	-0.55764	0.9346	-0.01399	-1.27203	0.95592	-0.02396	-2.17785
0.93445	-0.00147	-0.13369	0.93729	-0.0032	-0.29072	0.93445	-0.00603	-0.54848	0.93445	-0.01418	-1.28923	0.95556	-0.02372	-2.15676
0.9343	-0.00165	-0.14995	0.93717	-0.00323	-0.29369	0.9343	-0.00636	-0.57817	0.9343	-0.01427	-1.29727	0.95557	-0.02391	-2.17341
0.93414	-0.00143	-0.12995	0.93678	-0.00296	-0.26908	0.93414	-0.00595	-0.54072	0.93414	-0.01411	-1.28285	0.95543	-0.02392	-2.17452
0.93399	-0.00169	-0.15389	0.93657	-0.0029	-0.26328	0.93399	-0.00625	-0.5679	0.93399	-0.01397	-1.27036	0.95531	-0.02396	-2.17812
0.93384	-0.0014	-0.12759	0.93663	-0.00314	-0.28564	0.93384	-0.00628	-0.57096	0.93384	-0.0139	-1.26343	0.95526	-0.02407	-2.18811
0.93369	-0.00172	-0.15664	0.9366	-0.00328	-0.29791	0.93369	-0.00598	-0.54405	0.93369	-0.01396	-1.2687	0.95531	-0.0243	-2.2092
0.93353	-0.00138	-0.1259	0.93625	-0.00305	-0.27757	0.93353	-0.00643	-0.58427	0.93353	-0.01419	-1.29006	0.95519	-0.02433	-2.21225
0.93338	-0.00172	-0.1565	0.93593	-0.00287	-0.26087	0.93338	-0.00611	-0.55514	0.93338	-0.01427	-1.297	0.9551	-0.0244	-2.21863
0.93323	-0.00139	-0.12665	0.93597	-0.00308	-0.28015	0.93323	-0.00614	-0.55819	0.93323	-0.01426	-1.29616	0.95496	-0.02442	-2.22029
0.93307	-0.00173	-0.15689	0.93601	-0.0033	-0.30004	0.93307	-0.00641	-0.58289	0.93307	-0.01405	-1.2773	0.95484	-0.02445	-2.22279
0.93292	-0.0014	-0.12737	0.9357	-0.00312	-0.28362	0.93292	-0.00599	-0.54432	0.93292	-0.01381	-1.25538	0.95455	-0.0243	-2.2092
0.93277	-0.0017	-0.15497	0.93535	-0.0029	-0.26337	0.93277	-0.00632	-0.57429	0.93277	-0.0139	-1.26398	0.95437	-0.02427	-2.2067
0.93262	-0.00146	-0.13253	0.93532	-0.00304	-0.2763	0.93262	-0.00626	-0.56874	0.93262	-0.01403	-1.27563	0.95421	-0.02426	-2.20531
0.93246	-0.00165	-0.15004	0.93538	-0.00327	-0.2976	0.93246	-0.00603	-0.54793	0.93246	-0.01423	-1.29395	0.95391	-0.0241	-2.19088
0.93231	-0.00149	-0.13544	0.93516	-0.0032	-0.29047	0.93231	-0.00641	-0.58261	0.93231	-0.01431	-1.3006	0.95384	-0.02419	-2.19893
0.93216	-0.00161	-0.14671	0.93477	-0.00293	-0.26631	0.93216	-0.00609	-0.55376	0.93216	-0.01416	-1.28729	0.9537	-0.0242	-2.20004
0.93201	-0.00154	-0.14027	0.93463	-0.00295	-0.26844	0.93201	-0.00623	-0.56652	0.93201	-0.01408	-1.28007	0.95359	-0.02425	-2.20448
0.93185	-0.00155	-0.14107	0.93475	-0.00326	-0.29602	0.93185	-0.00639	-0.58094	0.93185	-0.014	-1.27314	0.95352	-0.02435	-2.21336
0.9317	-0.00161	-0.14657	0.93462	-0.00328	-0.29777	0.9317	-0.00605	-0.55043	0.9317	-0.01403	-1.27563	0.95357	-0.02458	-2.23416
0.93155	-0.00151	-0.13716	0.9342	-0.00298	-0.2705	0.93155	-0.00644	-0.58511	0.93155	-0.01431	-1.30088	0.95345	-0.0246	-2.23666
0.9314	-0.00166	-0.15101	0.93402	-0.00295	-0.26808	0.9314	-0.00619	-0.56236	0.9314	-0.01448	-1.31642	0.95346	-0.02479	-2.25358
0.93124	-0.00147	-0.13358	0.9341	-0.00321	-0.29183	0.93124	-0.00614	-0.55819	0.93124	-0.01441	-1.31031	0.95322	-0.02469	-2.24443
0.93109	-0.0017	-0.15459	0.93403	-0.0033	-0.29999	0.93109	-0.00645	-0.58621	0.93109	-0.01422	-1.29284	0.95312	-0.02475	-2.24998
0.93094	-0.00143	-0.13025	0.93367	-0.00306	-0.27851	0.93094	-0.00602	-0.54765	0.93094	-0.01404	-1.27619	0.95283	-0.02459	-2.23583
0.93079	-0.00174	-0.15805	0.93338	-0.00291	-0.26498	0.93079	-0.00634	-0.57623	0.93079	-0.01401	-1.27342	0.95265	-0.02457	-2.23361
0.93063	-0.00141	-0.12806	0.93343	-0.00314	-0.28526	0.93063	-0.00634	-0.5765	0.93063	-0.01418	-1.28867	0.95246	-0.02452	-2.22917
0.93048	-0.00175	-0.15894	0.93345	-0.00334	-0.30323	0.93048	-0.00605	-0.55015	0.93048	-0.01437	-1.30671	0.95225	-0.02446	-2.22334
0.93033	-0.00141	-0.12848	0.93313	-0.00314	-0.2857	0.93033	-0.0065	-0.59093	0.93033	-0.01443	-1.31198	0.95212	-0.02449	-2.2264
0.93018	-0.00175	-0.15914	0.93278	-0.00293	-0.26592	0.93018	-0.00618	-0.56152	0.93018	-0.01436	-1.3056	0.9519	-0.02441	-2.21891
0.93002	-0.00148	-0.13417	0.93283	-0.00316	-0.28695	0.93002	-0.00629	-0.57151	0.93002	-0.01427	-1.297	0.95191	-0.02459	-2.23583
0.92987	-0.00178	-0.16188	0.93288	-0.00338	-0.30703	0.92987	-0.00654	-0.59482	0.92987	-0.0142	-1.29062	0.95183	-0.02467	-2.24276
0.92972	-0.00149	-0.13578	0.93261	-0.00325	-0.29513	0.92972	-0.00613	-0.55764	0.92972	-0.01419	-1.29034	0.95188	-0.0249	-2.26329
0.92957	-0.00172	-0.15617	0.93224	-0.00301	-0.27319	0.92957	-0.00645	-0.58621	0.92957	-0.01444	-1.31309	0.95174	-0.02492	-2.26524
0.92941	-0.00153	-0.13885	0.93215	-0.00307	-0.2791	0.92941	-0.00636	-0.57845	0.92941	-0.01471	-1.3375	0.95182	-0.02518	-2.28882
0.92926	-0.00168	-0.15253	0.93223	-0.00334	-0.30354	0.92926	-0.00617	-0.56125	0.92926	-0.01458	-1.3253	0.95151	-0.025	-2.27273
0.92911	-0.00157	-0.14243	0.93207	-0.00333	-0.30265	0.92911	-0.00652	-0.59232	0.92911	-0.01444	-1.31253	0.95142	-0.02507	-2.27911
0.92896	-0.00163	-0.14807	0.93165	-0.00302	-0.27485	0.92896	-0.0062	-0.56347	0.92896	-0.01425	-1.29561	0.95116	-0.02495	-2.26829
0.9288	-0.00163	-0.14773	0.93147	-0.003	-0.2728	0.9288	-0.00638	-0.57956	0.9288	-0.01419	-1.29006	0.95099	-0.02493	-2.26607
0.92865	-0.00156	-0.14191	0.93158	-0.00329	-0.29938	0.92865	-0.00648	-0.58954	0.92865	-0.01436	-1.3056	0.95075	-0.02483	-2.25747
0.9285	-0.00168	-0.15234	0.93148	-0.00335	-0.3042	0.9285	-0.00616	-0.56014	0.9285	-0.01449	-1.31725	0.95056	-0.02479	-2.25386
0.92834	-0.00152	-0.13836	0.93109	-0.00309	-0.28071	0.92834	-0.00657	-0.59731	0.92834	-0.01459	-1.3264	0.95044	-0.02483	-2.25719
0.92819	-0.00172	-0.15619	0.93085	-0.00299	-0.27155	0.92819	-0.00629	-0.57151	0.92819	-0.01457	-1.32419	0.95019	-0.02472	-2.2472
0.92804	-0.00148	-0.1345	0.93091	-0.00322	-0.29316	0.92804	-0.00626	-0.56901	0.92804	-0.01433	-1.3031	0.95016	-0.02485	-2.25913
0.92789	-0.00176	-0.15988	0.93091	-0.00339	-0.30828	0.92789	-0.00657	-0.59703	0.92789	-0.01425	-1.29533	0.95011	-0.02497	-2.27023
0.92773	-0.00145	-0.13139	0.93056	-0.00318	-0.28878	0.92773	-0.00613	-0.55764	0.92773	-0.01428	-1.29838	0.95008	-0.02511	-2.28244
0.92758	-0.00178	-0.16188	0.93023	-0.00297	-0.27003	0.92758	-0.00645	-0.58649	0.92758	-0.01451	-1.31864	0.94995	-0.02513	-2.28466
0.92743	-0.00144	-0.13059	0.93024	-0.00316	-0.287	0.92743	-0.00643	-0.58427	0.92743	-0.01473	-1.33889	0.95006	-0.02543	-2.31212
0.92728	-0.00177	-0.16077	0.93029	-0.00339	-0.30784	0.92728	-0.00616	-0.55958	0.92728	-0.0147	-1.33639	0.94975	-0.02525	-2.29575
0.92712	-0.00144	-0.13109	0.93	-0.00323	-0.29347	0.92712	-0.00659	-0.59898	0.92712	-0.01458	-1.3253	0.94964	-0.0253	-2.29992
0.92697	-0.00177	-0.16069	0.92964	-0.003	-0.27249	0.92697	-0.00626	-0.56929	0.92697	-0.01439	-1.30782	0.94945	-0.02525	-2.29575
0.92682	-0.00147	-0.13325	0.92959	-0.00311	-0.28287	0.92682	-0.00633	-0.57567	0.92682	-0.01433	-1.3031	0.94925	-0.0252	-2.29076
0.92667	-0.00173	-0.15772	0.92966	-0.00336	-0.30587	0.92667	-0.00657	-0.59703	0.92667	-0.01448	-1.31614	0.94897	-0.02506	-2.278
0.92651	-0.00152	-0.13783	0.92946	-0.00331	-0.30124	0.92651	-0.00619	-0.56291	0.92651	-0.01461	-1.32835	0.94879	-0.02502	-2.27495
0.92636	-0.00169	-0.15392	0.92906	-0.00303	-0.27524	0.92636	-0.0065	-0.59121	0.92636	-0.01471	-1.33722	0.94867	-0.02506	-2.27828
0.92621	-0.00155	-0.14088	0.92891	-0.00303	-0.27557	0.92621	-0.00639	-0.58067	0.92621	-0.01472	-1.33861	0.94847	-0.02501	-2.27384
0.92606	-0.00165	-0.15023	0.92903	-0.00334	-0.30348	0.92606	-0.00623	-0.56679	0.92606	-0.01447	-1.31559	0.94838	-0.02508	-2.27994
0.9259	-0.00162	-0.14701	0.9289	-0.00337	-0.30595	0.9259	-0.00657	-0.59703	0.9259	-0.01426	-1.29644	0.94836	-0.02523	-2.29353
0.92575	-0.00159	-0.14446	0.92849	-0.00308	-0.27976	0.92575	-0.00619	-0.56291	0.92575	-0.01439	-1.30809	0.9483	-0.02533	-2.30297
0.9256	-0.00166	-0.15117	0.92829	-0.00303	-0.27519	0.9256	-0.00645	-0.58621	0.9256	-0.01458	-1.32585	0.94818	-0.02537	-2.3063
0.92545	-0.00154	-0.14016	0.92837	-0.00329	-0.29916	0.92545	-0.00651	-0.59149	0.92545	-0.01477	-1.34305	0.94824	-0.02561	-2.32849
0.92529	-0.00171	-0.15528	0.92832	-0.0034	-0.30934	0.92529	-0.00621	-0.56458	0.92529	-0.01484	-1.34915	0.948	-0.02551	-2.31906
0.92514	-0.0015	-0.13655	0.92796	-0.00317	-0.28789	0.92514	-0.00664	-0.60369	0.92514	-0.01469	-1.33501	0.94786	-0.02553	-2.321
0.92499	-0.00176	-0.15961	0.92765	-0.00299	-0.27197	0.92499	-0.00632	-0.57456	0.92499	-0.01454	-1.32224	0.94771	-0.02553	-2.32128
0.92484	-0.00147	-0.13339	0.92769	-0.00321	-0.29147	0.92484	-0.00633	-0.57512	0.92484	-0.01448	-1.31642	0.9475	-0.02546	-2.3149
0.92468	-0.00179	-0.16235	0.92773	-0.00342	-0.31095	0.92468	-0.00662	-0.60175	0.92468	-0.01455	-1.32308	0.94719	-0.02529	-2.29908
0.92453	-0.00144	-0.13134	0.9274	-0.00323	-0.29355	0.92453	-0.00618	-0.56152	0.92453	-0.01477	-1.3425	0.94704	-0.0253	-2.29964
0.92438	-0.00179	-0.1628	0.92706	-0.00302	-0.27413	0.92438	-0.00652	-0.5926	0.92438	-0.01483	-1.3486	0.94683	-0.02523	-2.29381
0.92422	-0.00146	-0.13234	0.92704	-0.00316	-0.28773	0.92422	-0.00648	-0.58871	0.92422	-0.01485	-1.34999	0.94673	-0.02529	-2.29881
0.92407	-0.00179	-0.16235	0.9271	-0.0034	-0.30942	0.92407	-0.00623	-0.56652	0.92407	-0.01463	-1.33029	0.94658	-0.02529	-2.29908
0.92392	-0.00147	-0.13333	0.92686	-0.00331	-0.30071	0.92392	-0.00664	-0.60342	0.92392	-0.01439	-1.30809	0.9466	-0.02549	-2.31684
0.92377	-0.00176	-0.16016	0.92648	-0.00305	-0.27746	0.92377	-0.00633	-0.5754	0.92377	-0.01452	-1.31975	0.9465	-0.02554	-2.32211
0.92361	-0.00151	-0.13727	0.92636	-0.00309	-0.28046	0.92361	-0.00641	-0.58261	0.92361	-0.01465	-1.33195	0.94641	-0.02562	-2.32877
0.92346	-0.00172	-0.15617	0.92647	-0.00338	-0.30759	0.92346	-0.00662	-0.60175	0.92346	-0.01487	-1.35137	0.9464	-0.02578	-2.3432
0.92331	-0.00155	-0.14121	0.92633	-0.00339	-0.30831	0.92331	-0.00626	-0.56929	0.92331	-0.01494	-1.35775	0.94625	-0.02578	-2.3432
0.92316	-0.00169	-0.15345	0.92591	-0.00309	-0.28134	0.92316	-0.00659	-0.59953	0.92316	-0.01478	-1.34361	0.94613	-0.02581	-2.34652
0.923	-0.0016	-0.14554	0.92573	-0.00306	-0.27838	0.923	-0.00641	-0.58316	0.923	-0.01468	-1.33417	0.94595	-0.02578	-2.34375
0.92285	-0.00163	-0.14804	0.92583	-0.00334	-0.3039	0.92285	-0.00633	-0.57512	0.92285	-0.01459	-1.3264	0.94576	-0.02574	-2.34042
0.9227	-0.00166	-0.15106	0.92573	-0.00341	-0.31011	0.9227	-0.00663	-0.60314	0.9227	-0.01461	-1.32835	0.94543	-0.02554	-2.32183
0.92255	-0.00157	-0.14307	0.92536	-0.00316	-0.287	0.92255	-0.00623	-0.56652	0.92255	-0.01489	-1.35387	0.9453	-0.02556	-2.32405
0.92239	-0.00171	-0.15531	0.92509	-0.00303	-0.2753	0.92239	-0.00652	-0.5926	0.92239	-0.01503	-1.36608	0.94499	-0.02539	-2.30796
0.92224	-0.00153	-0.13899	0.92515	-0.00326	-0.29666	0.92224	-0.00655	-0.59537	0.92224	-0.01499	-1.36247	0.94499	-0.02556	-2.3235
0.92209	-0.00175	-0.15941	0.92515	-0.00344	-0.31297	0.92209	-0.00625	-0.56846	0.92209	-0.01478	-1.34333	0.9448	-0.02552	-2.32017
0.92194	-0.0015	-0.13627	0.92483	-0.00325	-0.29516	0.92194	-0.0067	-0.60896	0.92194	-0.01459	-1.3264	0.94483	-0.02572	-2.3382
0.92178	-0.00179	-0.16302	0.92448	-0.00303	-0.27541	0.92178	-0.00638	-0.57956	0.92178	-0.01459	-1.32613	0.94473	-0.02578	-2.34375
0.92163	-0.00147	-0.13358	0.92449	-0.00322	-0.29244	0.92163	-0.0064	-0.58178	0.92163	-0.01473	-1.33944	0.94467	-0.02589	-2.35346
0.92148	-0.0018	-0.16405	0.92454	-0.00344	-0.31256	0.92148	-0.00668	-0.60758	0.92148	-0.01493	-1.35748	0.94459	-0.02597	-2.36123
0.92133	-0.00147	-0.13383	0.92427	-0.00331	-0.30051	0.92133	-0.00625	-0.56818	0.92133	-0.01499	-1.36275	0.94445	-0.02599	-2.36234
0.92117	-0.00181	-0.1643	0.9239	-0.00307	-0.27893	0.92117	-0.00658	-0.59814	0.92117	-0.01489	-1.35332	0.94442	-0.02612	-2.37427
0.92102	-0.00147	-0.13364	0.92383	-0.00316	-0.28709	0.92102	-0.00653	-0.59398	0.92102	-0.01476	-1.34139	0.94419	-0.02603	-2.3665
0.92087	-0.0018	-0.16332	0.92392	-0.00342	-0.31128	0.92087	-0.0063	-0.57262	0.92087	-0.01469	-1.33528	0.94398	-0.02597	-2.36095
0.92072	-0.00151	-0.13725	0.92375	-0.0034	-0.30953	0.92072	-0.00668	-0.60758	0.92072	-0.01468	-1.33417	0.94369	-0.02582	-2.34708
0.92056	-0.00176	-0.15975	0.92333	-0.00311	-0.2824	0.92056	-0.00638	-0.58011	0.92056	-0.01494	-1.35831	0.94356	-0.02584	-2.34902
0.92041	-0.00156	-0.14188	0.92316	-0.00309	-0.28115	0.92041	-0.0065	-0.59065	0.92041	-0.01519	-1.38078	0.94319	-0.0256	-2.3271
0.92026	-0.00167	-0.15167	0.92322	-0.00333	-0.30301	0.92026	-0.0066	-0.59981	0.92026	-0.015	-1.36358	0.94318	-0.02576	-2.34181
0.9201	-0.00156	-0.14168	0.92312	-0.00338	-0.30751	0.9201	-0.00626	-0.56874	0.9201	-0.01484	-1.34915	0.94299	-0.02571	-2.33765
0.91995	-0.00164	-0.14876	0.92272	-0.00311	-0.28312	0.91995	-0.00664	-0.60369	0.91995	-0.01466	-1.33306	0.94296	-0.02585	-2.35013
0.9198	-0.00163	-0.14832	0.9225	-0.00304	-0.27613	0.9198	-0.0064	-0.58205	0.9198	-0.0146	-1.32696	0.94287	-0.02592	-2.35679
0.91965	-0.00158	-0.14338	0.92258	-0.00329	-0.29921	0.91965	-0.00635	-0.57706	0.91965	-0.01479	-1.34416	0.94286	-0.02608	-2.37094
0.91949	-0.00169	-0.15361	0.92255	-0.00343	-0.31192	0.91949	-0.00667	-0.60674	0.91949	-0.01492	-1.35609	0.94277	-0.02615	-2.37704
0.91934	-0.00154	-0.14035	0.92221	-0.00322	-0.29277	0.91934	-0.00624	-0.56707	0.91934	-0.015	-1.36358	0.94262	-0.02616	-2.37787
0.91919	-0.00174	-0.15836	0.92189	-0.00304	-0.2763	0.91919	-0.00657	-0.59731	0.91919	-0.01498	-1.36219	0.94257	-0.02627	-2.38814
0.91904	-0.00151	-0.13755	0.92192	-0.00324	-0.29422	0.91904	-0.00657	-0.59731	0.91904	-0.01475	-1.34111	0.94235	-0.02619	-2.38093
0.91888	-0.00178	-0.16219	0.92197	-0.00346	-0.31494	0.91888	-0.00627	-0.57012	0.91888	-0.01467	-1.3339	0.94211	-0.0261	-2.3726
0.91873	-0.00148	-0.13458	0.92166	-0.00329	-0.29927	0.91873	-0.00672	-0.61091	0.91873	-0.01468	-1.33473	0.94187	-0.026	-2.36373
0.91858	-0.00182	-0.16543	0.92131	-0.00307	-0.27868	0.91858	-0.0064	-0.58178	0.91858	-0.01492	-1.35637	0.9417	-0.02598	-2.36178
0.91843	-0.00147	-0.13406	0.92127	-0.00319	-0.29	0.91843	-0.00645	-0.58649	0.91843	-0.01515	-1.37718	0.94132	-0.02572	-2.3382
0.91827	-0.00181	-0.16479	0.92134	-0.00344	-0.31281	0.91827	-0.00671	-0.6098	0.91827	-0.01509	-1.3719	0.94133	-0.0259	-2.35485
0.91812	-0.00148	-0.13494	0.92113	-0.00338	-0.30703	0.91812	-0.0063	-0.57262	0.91812	-0.01498	-1.36164	0.94118	-0.0259	-2.35485
0.91797	-0.00182	-0.1651	0.92073	-0.0031	-0.28204	0.91797	-0.00662	-0.60147	0.91797	-0.01477	-1.34305	0.94106	-0.02595	-2.35901
0.91782	-0.0015	-0.13605	0.92059	-0.00312	-0.28365	0.91782	-0.00655	-0.59509	0.91782	-0.01474	-1.34	0.94097	-0.02602	-2.36539
0.91766	-0.00178	-0.1616	0.92071	-0.00342	-0.31131	0.91766	-0.00634	-0.5765	0.91766	-0.01489	-1.35332	0.94097	-0.02619	-2.38093
0.91751	-0.00155	-0.14074	0.92057	-0.00344	-0.31261	0.91751	-0.0067	-0.60924	0.91751	-0.01501	-1.36414	0.94088	-0.02626	-2.38703
0.91736	-0.00174	-0.15789	0.92017	-0.00316	-0.28723	0.91736	-0.00638	-0.57983	0.91736	-0.01509	-1.37218	0.94077	-0.02631	-2.39147
0.91721	-0.00159	-0.14476	0.91997	-0.00311	-0.28232	0.91721	-0.00656	-0.5962	0.91721	-0.0151	-1.37274	0.94067	-0.02636	-2.39674
0.91705	-0.0017	-0.15486	0.92006	-0.00338	-0.30753	0.91705	-0.00668	-0.6073	0.91705	-0.01485	-1.34999	0.94053	-0.02638	-2.39813
0.9169	-0.00165	-0.14995	0.91999	-0.00347	-0.31566	0.9169	-0.00634	-0.57678	0.9169	-0.01466	-1.33306	0.94026	-0.02624	-2.38564
0.91675	-0.00165	-0.14967	0.91963	-0.00324	-0.29477	0.91675	-0.00676	-0.61479	0.91675	-0.01477	-1.3425	0.94007	-0.02621	-2.38259
0.9166	-0.00171	-0.15558	0.91934	-0.00308	-0.27996	0.9166	-0.00648	-0.58871	0.9166	-0.01498	-1.36164	0.93992	-0.02621	-2.38259
0.91644	-0.00159	-0.14488	0.91938	-0.0033	-0.30038	0.91644	-0.00645	-0.58677	0.91644	-0.01517	-1.37884	0.93961	-0.02603	-2.36678
0.91629	-0.00175	-0.15936	0.91941	-0.0035	-0.31863	0.91629	-0.00676	-0.61479	0.91629	-0.01523	-1.38439	0.93957	-0.02616	-2.37815
0.91614	-0.00155	-0.14102	0.91909	-0.00331	-0.30135	0.91614	-0.00632	-0.57456	0.91614	-0.01509	-1.37163	0.93942	-0.02616	-2.37815
0.91599	-0.0018	-0.16327	0.91874	-0.00309	-0.28132	0.91599	-0.00664	-0.60369	0.91599	-0.01493	-1.3572	0.93931	-0.02621	-2.38259
0.91583	-0.00152	-0.13841	0.91873	-0.00326	-0.29619	0.91583	-0.00663	-0.60286	0.91583	-0.01487	-1.35137	0.93923	-0.02629	-2.39036
0.91568	-0.00183	-0.16643	0.91879	-0.00349	-0.31741	0.91568	-0.00636	-0.57789	0.91568	-0.01496	-1.3597	0.93929	-0.02652	-2.41117
0.91553	-0.00151	-0.13683	0.91854	-0.00339	-0.30795	0.91553	-0.00679	-0.61729	0.91553	-0.01515	-1.37718	0.93916	-0.02655	-2.41366
0.91537	-0.00184	-0.16701	0.91816	-0.00314	-0.28501	0.91537	-0.00647	-0.58843	0.91537	-0.01523	-1.38411	0.93913	-0.02669	-2.4267
0.91522	-0.00151	-0.13727	0.91806	-0.00319	-0.28964	0.91522	-0.00653	-0.59343	0.91522	-0.01523	-1.38494	0.93892	-0.02662	-2.42032
0.91507	-0.00184	-0.16718	0.91816	-0.00347	-0.31586	0.91507	-0.00677	-0.61535	0.91507	-0.01502	-1.36552	0.93882	-0.02669	-2.42642
0.91492	-0.00152	-0.13802	0.91801	-0.00348	-0.31627	0.91492	-0.00639	-0.58122	0.91492	-0.01477	-1.3425	0.93852	-0.02652	-2.41089
0.91476	-0.00182	-0.1656	0.91759	-0.00317	-0.2882	0.91476	-0.0067	-0.60896	0.91476	-0.0149	-1.35498	0.93834	-0.02649	-2.40839
0.91461	-0.00156	-0.14155	0.91742	-0.00315	-0.28673	0.91461	-0.0066	-0.60009	0.91461	-0.01505	-1.3683	0.93817	-0.02647	-2.40617
0.91446	-0.00177	-0.16135	0.91752	-0.00344	-0.31269	0.91446	-0.00643	-0.58427	0.91446	-0.01524	-1.38578	0.93794	-0.02638	-2.3984
0.91431	-0.00159	-0.14474	0.91742	-0.00349	-0.31766	0.91431	-0.00677	-0.6159	0.91431	-0.01533	-1.39354	0.93781	-0.02641	-2.40118
0.91415	-0.00174	-0.15825	0.91703	-0.00323	-0.294	0.91415	-0.00642	-0.58344	0.91415	-0.01516	-1.37828	0.93761	-0.02635	-2.39591
0.914	-0.00164	-0.14912	0.91679	-0.00313	-0.28451	0.914	-0.00665	-0.60425	0.914	-0.01505	-1.36857	0.93756	-0.02646	-2.40589
0.91385	-0.00168	-0.15295	0.91684	-0.00336	-0.30573	0.91385	-0.00672	-0.61118	0.91385	-0.01498	-1.36192	0.93748	-0.02656	-2.41422
0.9137	-0.00171	-0.15531	0.91685	-0.00354	-0.32174	0.9137	-0.00642	-0.58372	0.9137	-0.015	-1.36358	0.93754	-0.02679	-2.4353
0.91354	-0.00163	-0.14801	0.91651	-0.00333	-0.30257	0.91354	-0.00685	-0.62311	0.91354	-0.01528	-1.3891	0.93738	-0.02678	-2.43475
0.91339	-0.00176	-0.15961	0.91617	-0.00312	-0.28384	0.91339	-0.00654	-0.59482	0.91339	-0.0154	-1.39965	0.93746	-0.02705	-2.45888
0.91324	-0.00159	-0.14446	0.91619	-0.00332	-0.30176	0.91324	-0.00654	-0.59426	0.91324	-0.01537	-1.39743	0.93715	-0.02687	-2.44279
0.91309	-0.0018	-0.16399	0.91624	-0.00354	-0.32202	0.91309	-0.00684	-0.622	0.91309	-0.01517	-1.37884	0.93709	-0.02697	-2.45139
0.91293	-0.0016	-0.1456	0.916	-0.00344	-0.31281	0.91293	-0.00645	-0.58594	0.91293	-0.01501	-1.36497	0.93686	-0.02689	-2.44446
0.91278	-0.00187	-0.17043	0.91563	-0.00321	-0.29153	0.91278	-0.00678	-0.61673	0.91278	-0.01502	-1.3658	0.9367	-0.02687	-2.44279
0.91263	-0.00156	-0.14138	0.91556	-0.0033	-0.29985	0.91263	-0.00673	-0.61202	0.91263	-0.01516	-1.37856	0.93648	-0.0268	-2.43614
0.91248	-0.00189	-0.17156	0.91565	-0.00356	-0.32376	0.91248	-0.00648	-0.58899	0.91248	-0.01537	-1.39743	0.93628	-0.02675	-2.4317
0.91232	-0.00154	-0.14033	0.91545	-0.00351	-0.31941	0.91232	-0.00689	-0.62672	0.91232	-0.01544	-1.40353	0.93615	-0.02677	-2.43392
0.91217	-0.00188	-0.17057	0.91503	-0.00322	-0.29247	0.91217	-0.00657	-0.59759	0.91217	-0.01532	-1.39243	0.93591	-0.02668	-2.42504
0.91202	-0.00154	-0.14005	0.91488	-0.00322	-0.2923	0.91202	-0.00666	-0.60536	0.91202	-0.01519	-1.38078	0.93586	-0.02679	-2.43586
0.91187	-0.00187	-0.16979	0.915	-0.00352	-0.32035	0.91187	-0.00687	-0.62478	0.91187	-0.01513	-1.37523	0.93581	-0.0269	-2.44557
0.91171	-0.00156	-0.14224	0.91487	-0.00354	-0.32227	0.91171	-0.0065	-0.59121	0.91171	-0.01512	-1.3744	0.93579	-0.02706	-2.45972
0.91156	-0.00182	-0.16582	0.91446	-0.00326	-0.29658	0.91156	-0.00683	-0.62117	0.91156	-0.01537	-1.39771	0.93566	-0.02708	-2.46194
0.91141	-0.00161	-0.14596	0.91426	-0.0032	-0.29097	0.91141	-0.00666	-0.60564	0.91141	-0.0156	-1.41796	0.93577	-0.02737	-2.48857
0.91125	-0.00179	-0.16235	0.91433	-0.00346	-0.31436	0.91125	-0.00656	-0.5962	0.91125	-0.01549	-1.40825	0.93546	-0.0272	-2.47248
0.9111	-0.00165	-0.15006	0.91429	-0.00358	-0.32557	0.9111	-0.00689	-0.62617	0.9111	-0.01532	-1.39243	0.93535	-0.02724	-2.47636
0.91095	-0.00174	-0.15828	0.91394	-0.00336	-0.30509	0.91095	-0.00649	-0.58982	0.91095	-0.01514	-1.37607	0.93511	-0.02715	-2.46832
0.9108	-0.00171	-0.15539	0.91362	-0.00317	-0.28859	0.9108	-0.00677	-0.61535	0.9108	-0.01508	-1.37052	0.93493	-0.02711	-2.46471
0.91064	-0.00168	-0.15275	0.91365	-0.00338	-0.30731	0.91064	-0.00681	-0.61867	0.91064	-0.01526	-1.38716	0.93465	-0.02698	-2.4525
0.91049	-0.00176	-0.16036	0.91369	-0.0036	-0.32715	0.91049	-0.00649	-0.59038	0.91049	-0.01541	-1.40076	0.93446	-0.02693	-2.44862
0.91034	-0.00163	-0.14782	0.91338	-0.00342	-0.31064	0.91034	-0.00692	-0.62949	0.91034	-0.01548	-1.40742	0.93434	-0.02697	-2.45167
0.91019	-0.00181	-0.16435	0.91302	-0.00319	-0.28983	0.91019	-0.00661	-0.60064	0.91019	-0.01544	-1.40381	0.93412	-0.02689	-2.44474
0.91003	-0.00159	-0.14465	0.913	-0.00333	-0.30279	0.91003	-0.00663	-0.60286	0.91003	-0.01522	-1.38383	0.93403	-0.02697	-2.45139
0.90988	-0.00184	-0.1674	0.91306	-0.00357	-0.32435	0.90988	-0.00692	-0.62866	0.90988	-0.01516	-1.37801	0.93401	-0.02711	-2.46471
0.90973	-0.00155	-0.14121	0.91283	-0.00349	-0.31683	0.90973	-0.00648	-0.58871	0.90973	-0.01516	-1.37801	0.93395	-0.02721	-2.47387
0.90958	-0.00187	-0.17009	0.91244	-0.00322	-0.29283	0.90958	-0.0068	-0.6184	0.90958	-0.01539	-1.39909	0.93382	-0.02724	-2.47636
0.90942	-0.00154	-0.13974	0.91231	-0.00325	-0.29522	0.90942	-0.00676	-0.61424	0.90942	-0.01565	-1.4224	0.93391	-0.02751	-2.50133
0.90927	-0.00188	-0.17051	0.91243	-0.00355	-0.32243	0.90927	-0.00651	-0.59176	0.90927	-0.01555	-1.41407	0.93364	-0.02738	-2.48912
0.90912	-0.00154	-0.14027	0.91228	-0.00355	-0.32279	0.90912	-0.0069	-0.62755	0.90912	-0.01543	-1.40242	0.9335	-0.0274	-2.49051
0.90897	-0.00188	-0.17076	0.91186	-0.00325	-0.29563	0.90897	-0.00661	-0.60064	0.90897	-0.01523	-1.38494	0.93335	-0.0274	-2.49079
0.90881	-0.00156	-0.14185	0.91169	-0.00323	-0.29375	0.90881	-0.0067	-0.60952	0.90881	-0.01518	-1.37995	0.93313	-0.02733	-2.48413
0.90866	-0.00185	-0.16846	0.91178	-0.0035	-0.31849	0.90866	-0.00688	-0.62506	0.90866	-0.01535	-1.39521	0.93283	-0.02716	-2.46887
0.90851	-0.00161	-0.14593	0.9117	-0.00358	-0.32559	0.90851	-0.00653	-0.59398	0.90851	-0.01547	-1.40603	0.93265	-0.02713	-2.4661
0.90836	-0.00181	-0.16424	0.91132	-0.00334	-0.30321	0.90836	-0.00689	-0.62672	0.90836	-0.01556	-1.41435	0.93247	-0.0271	-2.46332
0.9082	-0.00164	-0.1492	0.91105	-0.0032	-0.29078	0.9082	-0.00668	-0.60702	0.9082	-0.01555	-1.41352	0.93235	-0.02713	-2.46638
0.90805	-0.00177	-0.16052	0.9111	-0.00342	-0.31106	0.90805	-0.00661	-0.60064	0.90805	-0.01529	-1.38966	0.9322	-0.02713	-2.46665
0.9079	-0.00169	-0.15373	0.91111	-0.0036	-0.32762	0.9079	-0.00692	-0.62922	0.9079	-0.01513	-1.37523	0.93221	-0.02732	-2.48385
0.90775	-0.00171	-0.15503	0.91078	-0.00341	-0.30975	0.90775	-0.00651	-0.59149	0.90775	-0.01521	-1.38245	0.93212	-0.02739	-2.49023
0.90759	-0.00175	-0.1593	0.91044	-0.0032	-0.29053	0.90759	-0.00682	-0.62006	0.90759	-0.01542	-1.40187	0.93202	-0.02744	-2.49467
0.90744	-0.00166	-0.15059	0.91044	-0.00337	-0.3062	0.90744	-0.00682	-0.61978	0.90744	-0.01562	-1.41962	0.93201	-0.0276	-2.50938
0.90729	-0.00179	-0.16274	0.91049	-0.00359	-0.32662	0.90729	-0.00653	-0.59371	0.90729	-0.01566	-1.42406	0.93182	-0.02756	-2.50549
0.90714	-0.00161	-0.14637	0.91023	-0.00347	-0.31588	0.90714	-0.00698	-0.63421	0.90714	-0.01552	-1.41074	0.93171	-0.02762	-2.51049
0.90698	-0.00184	-0.16765	0.90986	-0.00323	-0.29377	0.90698	-0.00665	-0.60425	0.90698	-0.01535	-1.39549	0.93155	-0.0276	-2.5091
0.90683	-0.00158	-0.14343	0.90977	-0.0033	-0.30002	0.90683	-0.00669	-0.60841	0.90683	-0.0153	-1.39105	0.93133	-0.02753	-2.503
0.90668	-0.00188	-0.1707	0.90987	-0.00358	-0.32576	0.90668	-0.00695	-0.63199	0.90668	-0.0154	-1.39965	0.93101	-0.02733	-2.48496
0.90652	-0.00155	-0.14094	0.9097	-0.00357	-0.32465	0.90652	-0.00654	-0.59454	0.90652	-0.01556	-1.41435	0.93087	-0.02735	-2.48635
0.90637	-0.00189	-0.17168	0.90928	-0.00327	-0.29707	0.90637	-0.00687	-0.62422	0.90637	-0.01563	-1.42129	0.93058	-0.0272	-2.47303
0.90622	-0.00155	-0.14094	0.90911	-0.00325	-0.29569	0.90622	-0.00679	-0.61701	0.90622	-0.01565	-1.4224	0.93055	-0.02733	-2.48496
0.90607	-0.00189	-0.17151	0.90922	-0.00354	-0.32199	0.90607	-0.00659	-0.59898	0.90607	-0.01542	-1.40159	0.93037	-0.02731	-2.48247
0.90591	-0.00156	-0.14193	0.90911	-0.00359	-0.32601	0.90591	-0.00695	-0.63171	0.90591	-0.01518	-1.38023	0.93039	-0.0275	-2.50022
0.90576	-0.00188	-0.17073	0.90873	-0.00333	-0.30298	0.90576	-0.00665	-0.60425	0.90576	-0.01533	-1.39354	0.93029	-0.02756	-2.50549
0.90561	-0.00159	-0.14485	0.90849	-0.00324	-0.29413	0.90561	-0.00679	-0.61756	0.90561	-0.01548	-1.40714	0.9302	-0.02763	-2.51215
0.90546	-0.00183	-0.16674	0.90855	-0.00347	-0.31575	0.90546	-0.00692	-0.62894	0.90546	-0.01568	-1.42517	0.93015	-0.02775	-2.52242
0.9053	-0.00164	-0.1487	0.90853	-0.00363	-0.3299	0.9053	-0.00659	-0.59898	0.9053	-0.01576	-1.43266	0.93	-0.02775	-2.52269
0.90515	-0.0018	-0.16385	0.90819	-0.00342	-0.31084	0.90515	-0.00699	-0.63532	0.90515	-0.01559	-1.4174	0.92995	-0.02787	-2.53324
0.905	-0.00168	-0.15237	0.90786	-0.00322	-0.2923	0.905	-0.00672	-0.61063	0.905	-0.01548	-1.40714	0.92971	-0.02777	-2.52436
0.90485	-0.00175	-0.15941	0.90788	-0.00341	-0.31034	0.90485	-0.00668	-0.6073	0.90485	-0.01539	-1.39909	0.92953	-0.02774	-2.52158
0.90469	-0.00174	-0.15847	0.90793	-0.00364	-0.33078	0.90469	-0.00699	-0.63588	0.90469	-0.01543	-1.4027	0.92921	-0.02755	-2.50466
0.90454	-0.00169	-0.15325	0.90763	-0.00347	-0.31536	0.90454	-0.00657	-0.59703	0.90454	-0.01568	-1.42573	0.92909	-0.02758	-2.50771
0.90439	-0.00179	-0.16291	0.90728	-0.00325	-0.29547	0.90439	-0.00688	-0.62533	0.90439	-0.01578	-1.4346	0.92871	-0.02733	-2.48441
0.90424	-0.00164	-0.14951	0.90722	-0.00336	-0.30531	0.90424	-0.00687	-0.62422	0.90424	-0.01578	-1.4346	0.92875	-0.02754	-2.50355
0.90408	-0.00185	-0.16782	0.9073	-0.00361	-0.3282	0.90408	-0.00659	-0.5987	0.90408	-0.01556	-1.41463	0.92855	-0.0275	-2.49967
0.90393	-0.00161	-0.14637	0.9071	-0.00357	-0.32418	0.90393	-0.00703	-0.63865	0.90393	-0.01535	-1.39576	0.92854	-0.02766	-2.51409
0.90378	-0.00188	-0.17129	0.9067	-0.00328	-0.29821	0.90378	-0.00669	-0.60841	0.90378	-0.0154	-1.39965	0.92846	-0.02773	-2.52131
0.90363	-0.00158	-0.14357	0.90654	-0.00328	-0.2981	0.90363	-0.00675	-0.61368	0.90363	-0.01554	-1.41269	0.92841	-0.02785	-2.53185
0.90347	-0.00191	-0.17323	0.90667	-0.00359	-0.32643	0.90347	-0.007	-0.63643	0.90347	-0.01574	-1.431	0.92832	-0.02792	-2.53823
0.90332	-0.00157	-0.14291	0.90653	-0.00361	-0.32781	0.90332	-0.00661	-0.6012	0.90332	-0.01581	-1.43682	0.92818	-0.02794	-2.53962
0.90317	-0.0019	-0.17287	0.90613	-0.00333	-0.30268	0.90317	-0.00692	-0.62894	0.90317	-0.01567	-1.42489	0.92814	-0.02806	-2.55071
0.90302	-0.00157	-0.14279	0.90593	-0.00327	-0.29738	0.90302	-0.00682	-0.62006	0.90302	-0.01555	-1.4138	0.92791	-0.02797	-2.54239
0.90286	-0.0019	-0.17254	0.906	-0.00352	-0.32021	0.90286	-0.00664	-0.60397	0.90286	-0.01548	-1.40714	0.92769	-0.0279	-2.53629
0.90271	-0.00159	-0.1446	0.90595	-0.00364	-0.33131	0.90271	-0.00699	-0.63588	0.90271	-0.01549	-1.40852	0.92744	-0.02778	-2.52575
0.90256	-0.00187	-0.16976	0.90559	-0.00341	-0.30959	0.90256	-0.00665	-0.6048	0.90256	-0.01575	-1.43183	0.92729	-0.02779	-2.5263
0.9024	-0.00164	-0.14898	0.90529	-0.00324	-0.29463	0.9024	-0.00686	-0.62339	0.9024	-0.01596	-1.45097	0.9269	-0.02753	-2.50244
0.90225	-0.00182	-0.16579	0.90532	-0.00345	-0.31325	0.90225	-0.00695	-0.63144	0.90225	-0.01586	-1.44209	0.92694	-0.02773	-2.52131
0.9021	-0.00167	-0.15189	0.90536	-0.00366	-0.33309	0.9021	-0.00664	-0.60369	0.9021	-0.01567	-1.42434	0.92678	-0.02773	-2.52103
0.90195	-0.00179	-0.16263	0.90503	-0.00347	-0.31539	0.90195	-0.00706	-0.6417	0.90195	-0.0155	-1.40908	0.92668	-0.02779	-2.52658
0.90179	-0.00172	-0.15672	0.90469	-0.00326	-0.29616	0.90179	-0.00675	-0.61368	0.90179	-0.01544	-1.40381	0.92663	-0.0279	-2.53657
0.90164	-0.00172	-0.15656	0.90468	-0.00341	-0.30992	0.90164	-0.00675	-0.61368	0.90164	-0.01561	-1.41934	0.92662	-0.02807	-2.55155
0.90149	-0.00179	-0.16271	0.90474	-0.00365	-0.33192	0.90149	-0.00705	-0.64115	0.90149	-0.01576	-1.43294	0.92652	-0.02813	-2.5571
0.90134	-0.00167	-0.15223	0.9045	-0.00355	-0.32304	0.90134	-0.00661	-0.60092	0.90134	-0.01584	-1.43987	0.92638	-0.02814	-2.55821
0.90118	-0.00184	-0.16707	0.90411	-0.00329	-0.29921	0.90118	-0.00695	-0.63144	0.90118	-0.01579	-1.43544	0.9263	-0.02823	-2.56597
0.90103	-0.00163	-0.14851	0.90399	-0.00333	-0.30265	0.90103	-0.00691	-0.62811	0.90103	-0.01559	-1.41713	0.92613	-0.0282	-2.56375
0.90088	-0.00187	-0.17043	0.90411	-0.00363	-0.32995	0.90088	-0.00664	-0.60342	0.90088	-0.01553	-1.41213	0.92586	-0.02807	-2.55155
0.90073	-0.00158	-0.14329	0.90394	-0.00361	-0.32798	0.90073	-0.00703	-0.63948	0.90073	-0.01549	-1.40852	0.92562	-0.02797	-2.54295
0.90057	-0.00189	-0.17168	0.90352	-0.00331	-0.30121	0.90057	-0.00671	-0.61035	0.90057	-0.01574	-1.431	0.92546	-0.02797	-2.54239
0.90042	-0.00156	-0.14207	0.90334	-0.00328	-0.29805	0.90042	-0.0068	-0.61784	0.90042	-0.01599	-1.45319	0.92512	-0.02775	-2.52297
0.90027	-0.0019	-0.1727	0.90344	-0.00356	-0.32401	0.90027	-0.00701	-0.63754	0.90027	-0.01588	-1.44404	0.92509	-0.02788	-2.5349
0.90012	-0.00157	-0.14271	0.90335	-0.00363	-0.33039	0.90012	-0.00665	-0.60425	0.90012	-0.01577	-1.43322	0.92495	-0.0279	-2.53657
0.89996	-0.00191	-0.17328	0.90298	-0.00339	-0.30784	0.89996	-0.00697	-0.63366	0.89996	-0.01557	-1.41518	0.92482	-0.02793	-2.53906
0.89981	-0.00158	-0.14402	0.90272	-0.00326	-0.29666	0.89981	-0.00682	-0.62006	0.89981	-0.01551	-1.41019	0.92475	-0.02802	-2.54711
0.89966	-0.0019	-0.17278	0.90277	-0.0035	-0.31777	0.89966	-0.0067	-0.60924	0.89966	-0.01568	-1.42573	0.92479	-0.02823	-2.56681
0.89951	-0.00163	-0.14782	0.90278	-0.00368	-0.33444	0.89951	-0.00704	-0.63976	0.89951	-0.01579	-1.43516	0.92466	-0.02826	-2.56903
0.89935	-0.00185	-0.16774	0.90245	-0.00348	-0.31677	0.89935	-0.00665	-0.60425	0.89935	-0.01588	-1.44376	0.9246	-0.02837	-2.57929
0.8992	-0.00167	-0.15181	0.9021	-0.00326	-0.29621	0.8992	-0.00692	-0.62866	0.8992	-0.01587	-1.44293	0.92441	-0.02833	-2.57541
0.89905	-0.00182	-0.16521	0.90212	-0.00345	-0.31358	0.89905	-0.00696	-0.6331	0.89905	-0.01562	-1.42018	0.9243	-0.02838	-2.57957
0.8989	-0.00172	-0.15606	0.90216	-0.00367	-0.33345	0.8989	-0.00668	-0.60702	0.8989	-0.01548	-1.40769	0.92399	-0.0282	-2.56375
0.89874	-0.00177	-0.16066	0.9019	-0.00354	-0.3221	0.89874	-0.0071	-0.64586	0.89874	-0.01555	-1.41324	0.92382	-0.02818	-2.56153
0.89859	-0.00178	-0.16221	0.90153	-0.0033	-0.2999	0.89859	-0.00679	-0.61701	0.89859	-0.01577	-1.43377	0.92363	-0.02814	-2.55793
0.89844	-0.00171	-0.15583	0.90145	-0.00338	-0.30753	0.89844	-0.00679	-0.61701	0.89844	-0.01597	-1.4518	0.92339	-0.02804	-2.54877
0.89828	-0.0018	-0.16388	0.90151	-0.00363	-0.32962	0.89828	-0.00706	-0.6417	0.89828	-0.01595	-1.45042	0.92324	-0.02804	-2.54877
0.89813	-0.00164	-0.14943	0.90134	-0.00361	-0.32773	0.89813	-0.00662	-0.60175	0.89813	-0.01582	-1.43793	0.92305	-0.028	-2.54544
0.89798	-0.00185	-0.16832	0.90092	-0.00331	-0.30068	0.89798	-0.00695	-0.63227	0.89798	-0.01564	-1.42184	0.92295	-0.02806	-2.55099
0.89783	-0.00161	-0.14665	0.90077	-0.0033	-0.30027	0.89783	-0.00691	-0.62783	0.89783	-0.01559	-1.41768	0.92287	-0.02814	-2.55848
0.89767	-0.0019	-0.17256	0.90087	-0.00359	-0.3267	0.89767	-0.00666	-0.60508	0.89767	-0.01571	-1.42795	0.92293	-0.02838	-2.57957
0.89752	-0.00159	-0.14479	0.90077	-0.00364	-0.33131	0.89752	-0.00706	-0.64198	0.89752	-0.01587	-1.44237	0.92278	-0.02838	-2.57957
0.89737	-0.00192	-0.17489	0.90037	-0.00337	-0.30678	0.89737	-0.00676	-0.61424	0.89737	-0.01594	-1.44875	0.92281	-0.02859	-2.59871
0.89722	-0.00158	-0.14396	0.90015	-0.0033	-0.29965	0.89722	-0.00685	-0.62284	0.89722	-0.01596	-1.45097	0.92253	-0.02845	-2.58595
0.89706	-0.00192	-0.17462	0.90022	-0.00354	-0.32227	0.89706	-0.00705	-0.64059	0.89706	-0.01571	-1.42822	0.92244	-0.02851	-2.59205
0.89691	-0.00159	-0.14471	0.9002	-0.00369	-0.33572	0.89691	-0.0067	-0.60924	0.89691	-0.01548	-1.40714	0.92215	-0.02836	-2.57818
0.89676	-0.00192	-0.17439	0.89985	-0.00347	-0.31572	0.89676	-0.00705	-0.64059	0.89676	-0.01563	-1.42045	0.92197	-0.02833	-2.57541
0.89661	-0.00162	-0.14687	0.89952	-0.00328	-0.29799	0.89661	-0.00685	-0.62228	0.89661	-0.0158	-1.43599	0.92175	-0.02825	-2.56819
0.89645	-0.00188	-0.17115	0.89955	-0.00348	-0.31652	0.89645	-0.00676	-0.61479	0.89645	-0.01599	-1.45347	0.92156	-0.02821	-2.56459
0.8963	-0.00167	-0.15164	0.8996	-0.00371	-0.33708	0.8963	-0.00708	-0.64337	0.8963	-0.01608	-1.46151	0.92142	-0.02823	-2.56597
0.89615	-0.00184	-0.16743	0.89929	-0.00353	-0.3211	0.89615	-0.00667	-0.60647	0.89615	-0.01591	-1.44653	0.92118	-0.02812	-2.55654
0.896	-0.00171	-0.15536	0.89894	-0.00331	-0.30085	0.896	-0.00697	-0.63393	0.896	-0.01579	-1.43544	0.92113	-0.02824	-2.56708
0.89584	-0.0018	-0.16402	0.8989	-0.00343	-0.31195	0.89584	-0.007	-0.63615	0.89584	-0.0157	-1.42684	0.92105	-0.02832	-2.57457
0.89569	-0.00177	-0.16055	0.89897	-0.00368	-0.33453	0.89569	-0.0067	-0.60869	0.89569	-0.01575	-1.43183	0.92108	-0.02852	-2.59288
0.89554	-0.00174	-0.15805	0.89875	-0.00361	-0.32834	0.89554	-0.00713	-0.64836	0.89554	-0.01599	-1.45347	0.92093	-0.02852	-2.59316
0.89539	-0.00183	-0.16593	0.89837	-0.00335	-0.3044	0.89539	-0.00682	-0.62034	0.89539	-0.01607	-1.46124	0.92103	-0.02881	-2.61896
0.89523	-0.00169	-0.15367	0.89822	-0.00335	-0.30462	0.89523	-0.00685	-0.62256	0.89523	-0.01609	-1.46262	0.92069	-0.0286	-2.6001
0.89508	-0.00187	-0.16982	0.89834	-0.00366	-0.33292	0.89508	-0.00713	-0.6478	0.89508	-0.01588	-1.4432	0.9206	-0.02867	-2.60648
0.89493	-0.00165	-0.15037	0.8982	-0.00368	-0.33453	0.89493	-0.00669	-0.60841	0.89493	-0.01565	-1.4224	0.92036	-0.02858	-2.59788
0.89478	-0.00191	-0.17373	0.89781	-0.00341	-0.30986	0.89478	-0.00703	-0.6392	0.89478	-0.01572	-1.42878	0.92015	-0.02851	-2.59205
0.89462	-0.00162	-0.14737	0.8976	-0.00335	-0.30443	0.89462	-0.00697	-0.63338	0.89462	-0.01585	-1.44126	0.9199	-0.0284	-2.58179
0.89447	-0.00194	-0.17653	0.89768	-0.00361	-0.32793	0.89447	-0.00675	-0.61396	0.89447	-0.01606	-1.4604	0.91971	-0.02835	-2.57763
0.89432	-0.0016	-0.14574	0.89762	-0.00371	-0.33739	0.89432	-0.00713	-0.64808	0.89432	-0.01612	-1.4654	0.91959	-0.02839	-2.58095
0.89417	-0.00194	-0.17667	0.89726	-0.00348	-0.31602	0.89417	-0.00681	-0.61951	0.89417	-0.01599	-1.45319	0.91935	-0.0283	-2.57291
0.89401	-0.00161	-0.14621	0.89696	-0.00332	-0.30149	0.89401	-0.00695	-0.63171	0.89401	-0.01588	-1.44404	0.91928	-0.02839	-2.58095
0.89386	-0.00195	-0.17689	0.89701	-0.00354	-0.32146	0.89386	-0.00709	-0.6442	0.89386	-0.0158	-1.43599	0.91924	-0.02852	-2.59233
0.89371	-0.00162	-0.14754	0.89703	-0.00374	-0.33985	0.89371	-0.00675	-0.6134	0.89371	-0.01581	-1.43682	0.91919	-0.02863	-2.60315
0.89355	-0.00192	-0.17487	0.89671	-0.00355	-0.32254	0.89355	-0.00714	-0.64891	0.89355	-0.01608	-1.46179	0.91906	-0.02866	-2.60509
0.8934	-0.00166	-0.1512	0.89636	-0.00332	-0.30196	0.8934	-0.00688	-0.62561	0.8934	-0.01626	-1.47844	0.91916	-0.02895	-2.63145
0.89325	-0.00187	-0.16984	0.89634	-0.00347	-0.31588	0.89325	-0.00684	-0.622	0.89325	-0.01618	-1.47067	0.91886	-0.02877	-2.61563
0.8931	-0.0017	-0.15442	0.8964	-0.00371	-0.33719	0.8931	-0.00715	-0.64975	0.8931	-0.01598	-1.45291	0.91872	-0.02879	-2.6173
0.89294	-0.00184	-0.16754	0.89616	-0.00361	-0.32851	0.89294	-0.00672	-0.61063	0.89294	-0.01582	-1.43793	0.91855	-0.02877	-2.61508
0.89279	-0.00176	-0.15961	0.89578	-0.00336	-0.30573	0.89279	-0.00703	-0.6392	0.89279	-0.01576	-1.43238	0.91834	-0.0287	-2.60953
0.89264	-0.00178	-0.16219	0.89567	-0.0034	-0.30953	0.89264	-0.00703	-0.6392	0.89264	-0.01592	-1.44764	0.91803	-0.02853	-2.59399
0.89249	-0.00182	-0.1656	0.89577	-0.00369	-0.33575	0.89249	-0.00674	-0.61313	0.89249	-0.01609	-1.46262	0.91787	-0.02852	-2.59233
0.89233	-0.00173	-0.15753	0.89563	-0.0037	-0.33672	0.89233	-0.00719	-0.65335	0.89233	-0.01617	-1.46984	0.91769	-0.02849	-2.59039
0.89218	-0.00186	-0.16932	0.8952	-0.0034	-0.3087	0.89218	-0.00686	-0.62367	0.89218	-0.01609	-1.46235	0.91755	-0.02851	-2.5915
0.89203	-0.00169	-0.15342	0.89504	-0.00338	-0.30753	0.89203	-0.00692	-0.62894	0.89203	-0.01592	-1.44764	0.91742	-0.02852	-2.59316
0.89188	-0.00191	-0.17356	0.89513	-0.00365	-0.33192	0.89188	-0.00717	-0.65224	0.89188	-0.01587	-1.44237	0.91742	-0.0287	-2.6087
0.89172	-0.00165	-0.15009	0.89504	-0.00372	-0.3383	0.89172	-0.00678	-0.61618	0.89172	-0.01586	-1.44154	0.91733	-0.02877	-2.61508
0.89157	-0.00195	-0.17706	0.89466	-0.00347	-0.31541	0.89157	-0.00708	-0.64392	0.89157	-0.0161	-1.46373	0.91722	-0.02882	-2.6198
0.89142	-0.00162	-0.14765	0.89439	-0.00334	-0.30379	0.89142	-0.00701	-0.63699	0.89142	-0.01634	-1.48565	0.91725	-0.02902	-2.63811
0.89127	-0.00196	-0.17819	0.89445	-0.00358	-0.32518	0.89127	-0.00682	-0.61978	0.89127	-0.01623	-1.47539	0.91702	-0.02894	-2.63089
0.89111	-0.00163	-0.14795	0.89446	-0.00376	-0.34196	0.89111	-0.00717	-0.65141	0.89111	-0.01609	-1.46235	0.9169	-0.02897	-2.63394
0.89096	-0.00201	-0.1825	0.89417	-0.00361	-0.32795	0.89096	-0.00689	-0.62644	0.89096	-0.01595	-1.45042	0.91679	-0.02903	-2.63866
0.89081	-0.00167	-0.15173	0.89382	-0.00338	-0.3072	0.89081	-0.00709	-0.6442	0.89081	-0.01589	-1.44487	0.91658	-0.02896	-2.63256
0.89066	-0.00198	-0.18025	0.89384	-0.00357	-0.32493	0.89066	-0.00717	-0.65224	0.89066	-0.01607	-1.46068	0.91625	-0.02876	-2.61425
0.8905	-0.00169	-0.1537	0.89388	-0.00379	-0.34449	0.8905	-0.00686	-0.62395	0.8905	-0.01619	-1.47178	0.91611	-0.02877	-2.61536
0.89035	-0.00193	-0.17589	0.89359	-0.00364	-0.331	0.89035	-0.00727	-0.66084	0.89035	-0.01628	-1.48038	0.91584	-0.02864	-2.6037
0.8902	-0.00173	-0.15683	0.89323	-0.00341	-0.30992	0.8902	-0.00698	-0.63421	0.8902	-0.01627	-1.47927	0.91578	-0.02874	-2.61314
0.89005	-0.00189	-0.17204	0.89316	-0.0035	-0.31797	0.89005	-0.00695	-0.63144	0.89005	-0.01602	-1.45597	0.9156	-0.02872	-2.61064
0.88989	-0.00176	-0.16044	0.89324	-0.00377	-0.34238	0.88989	-0.00725	-0.65918	0.88989	-0.0159	-1.44542	0.91563	-0.02892	-2.62895
0.88974	-0.00185	-0.16774	0.89306	-0.00373	-0.33922	0.88974	-0.00681	-0.61923	0.88974	-0.01595	-1.45014	0.91552	-0.02897	-2.63339
0.88959	-0.00182	-0.16582	0.89265	-0.00344	-0.31256	0.88959	-0.00714	-0.64891	0.88959	-0.01617	-1.46956	0.91543	-0.02903	-2.63949
0.88943	-0.00178	-0.1618	0.89248	-0.00343	-0.31145	0.88943	-0.00711	-0.6467	0.88943	-0.01638	-1.48926	0.91538	-0.02915	-2.65031
0.88928	-0.00187	-0.16987	0.8926	-0.00373	-0.33866	0.88928	-0.00685	-0.62228	0.88928	-0.01637	-1.48843	0.91523	-0.02916	-2.65059
0.88913	-0.00173	-0.15714	0.89247	-0.00376	-0.34163	0.88913	-0.00727	-0.66084	0.88913	-0.01623	-1.47539	0.91516	-0.02925	-2.65919
0.88898	-0.00191	-0.17392	0.89208	-0.00349	-0.31711	0.88898	-0.00695	-0.63171	0.88898	-0.01605	-1.45874	0.91494	-0.02917	-2.65198
0.88882	-0.00169	-0.154	0.89186	-0.00341	-0.3102	0.88882	-0.00701	-0.63726	0.88882	-0.016	-1.4543	0.91475	-0.02913	-2.64809
0.88867	-0.00195	-0.17733	0.89193	-0.00366	-0.33275	0.88867	-0.00725	-0.65918	0.88867	-0.01612	-1.46568	0.91442	-0.02893	-2.63034
0.88852	-0.00165	-0.14979	0.8919	-0.0038	-0.34507	0.88852	-0.00687	-0.62422	0.88852	-0.01625	-1.47761	0.91429	-0.02895	-2.632
0.88837	-0.00197	-0.17933	0.89155	-0.00357	-0.32479	0.88837	-0.00717	-0.65197	0.88837	-0.01635	-1.48593	0.91394	-0.02873	-2.61175
0.88821	-0.00163	-0.14862	0.89122	-0.00338	-0.30717	0.88821	-0.00706	-0.6417	0.88821	-0.01635	-1.48621	0.91395	-0.02892	-2.62923
0.88806	-0.00198	-0.17964	0.89125	-0.00358	-0.32584	0.88806	-0.00691	-0.62838	0.88806	-0.01609	-1.46318	0.91376	-0.02888	-2.62507
0.88791	-0.00164	-0.14912	0.89129	-0.0038	-0.3456	0.88791	-0.00724	-0.65807	0.88791	-0.01588	-1.4432	0.91376	-0.02905	-2.64088
0.88776	-0.00197	-0.17922	0.89098	-0.00362	-0.32942	0.88776	-0.00687	-0.62478	0.88776	-0.01601	-1.45513	0.91366	-0.02911	-2.64643
0.8876	-0.00166	-0.15084	0.89063	-0.0034	-0.30939	0.8876	-0.00712	-0.64753	0.8876	-0.01619	-1.47178	0.9136	-0.02921	-2.65558
0.88745	-0.00195	-0.17722	0.89059	-0.00353	-0.32077	0.88745	-0.00718	-0.65308	0.88745	-0.01638	-1.48954	0.91351	-0.02928	-2.66224
0.8873	-0.00171	-0.155	0.89066	-0.00378	-0.34324	0.8873	-0.00687	-0.6245	0.8873	-0.01646	-1.49675	0.91337	-0.02929	-2.66307
0.88715	-0.00191	-0.17337	0.89044	-0.0037	-0.33669	0.88715	-0.00731	-0.66445	0.88715	-0.0163	-1.48149	0.91334	-0.02943	-2.67528
0.88699	-0.00174	-0.15822	0.89005	-0.00344	-0.31258	0.88699	-0.00699	-0.63532	0.88699	-0.01616	-1.46901	0.91309	-0.02933	-2.66613
0.88684	-0.00186	-0.16943	0.88991	-0.00345	-0.31391	0.88684	-0.007	-0.63615	0.88684	-0.01608	-1.46179	0.91289	-0.02927	-2.66058
0.88669	-0.00179	-0.16241	0.89003	-0.00375	-0.34127	0.88669	-0.00728	-0.66223	0.88669	-0.01613	-1.46623	0.91261	-0.02913	-2.64782
0.88654	-0.0018	-0.16407	0.88988	-0.00376	-0.34199	0.88654	-0.00685	-0.62256	0.88654	-0.01637	-1.48843	0.91247	-0.02914	-2.64948
0.88638	-0.00185	-0.16796	0.88947	-0.00347	-0.31555	0.88638	-0.00718	-0.65252	0.88638	-0.01644	-1.49481	0.91209	-0.02888	-2.62534
0.88623	-0.00175	-0.15914	0.88928	-0.00343	-0.31186	0.88623	-0.00714	-0.64864	0.88623	-0.01644	-1.49481	0.91213	-0.0291	-2.64504
0.88608	-0.0019	-0.17259	0.88937	-0.0037	-0.33622	0.88608	-0.00687	-0.62478	0.88608	-0.01623	-1.47566	0.91195	-0.02907	-2.64254
0.88593	-0.00171	-0.15572	0.8893	-0.00379	-0.3449	0.88593	-0.00729	-0.66306	0.88593	-0.016	-1.4543	0.91187	-0.02916	-2.65059
0.88577	-0.00194	-0.17598	0.88894	-0.00355	-0.32318	0.88577	-0.00698	-0.63421	0.88577	-0.01609	-1.4629	0.91181	-0.02925	-2.65919
0.88562	-0.00167	-0.15195	0.88864	-0.0034	-0.30873	0.88562	-0.00706	-0.6417	0.88562	-0.01623	-1.47566	0.91179	-0.0294	-2.67306
0.88547	-0.00198	-0.17958	0.88869	-0.00362	-0.32881	0.88547	-0.00727	-0.66084	0.88547	-0.01643	-1.49397	0.9117	-0.02948	-2.67972
0.88531	-0.00165	-0.15004	0.88871	-0.00382	-0.34715	0.88531	-0.00691	-0.62838	0.88531	-0.01649	-1.49925	0.91154	-0.02947	-2.67917
0.88516	-0.00199	-0.181	0.88839	-0.00362	-0.32953	0.88516	-0.00724	-0.65862	0.88516	-0.01636	-1.48732	0.91147	-0.02956	-2.68721
0.88501	-0.00165	-0.14995	0.88804	-0.0034	-0.30925	0.88501	-0.00706	-0.6417	0.88501	-0.01625	-1.47705	0.91128	-0.02952	-2.68333
0.88486	-0.00198	-0.18036	0.88803	-0.00357	-0.32451	0.88486	-0.00696	-0.6331	0.88486	-0.01616	-1.46901	0.91104	-0.02942	-2.67417
0.8847	-0.00166	-0.15076	0.88809	-0.0038	-0.34557	0.8847	-0.00729	-0.66306	0.8847	-0.01617	-1.47011	0.91081	-0.02934	-2.66696
0.88455	-0.00197	-0.17917	0.88783	-0.00369	-0.33503	0.88455	-0.00689	-0.62617	0.88455	-0.01643	-1.4937	0.91065	-0.02932	-2.66529
0.8844	-0.00169	-0.15395	0.88746	-0.00344	-0.31258	0.8844	-0.00717	-0.65197	0.8844	-0.01661	-1.50979	0.9103	-0.0291	-2.6456
0.88425	-0.00193	-0.17545	0.88735	-0.00349	-0.31727	0.88425	-0.00721	-0.6553	0.88425	-0.01653	-1.50313	0.91027	-0.02924	-2.65836
0.88409	-0.00174	-0.15783	0.88746	-0.00378	-0.34368	0.88409	-0.00691	-0.62783	0.88409	-0.01634	-1.4851	0.91013	-0.02926	-2.65975
0.88394	-0.00189	-0.17204	0.88731	-0.00378	-0.34368	0.88394	-0.00734	-0.6675	0.88394	-0.01616	-1.46901	0.91001	-0.02929	-2.66307
0.88379	-0.00178	-0.16149	0.88688	-0.00348	-0.31608	0.88379	-0.00703	-0.6392	0.88379	-0.01612	-1.4654	0.90994	-0.02938	-2.67084
0.88364	-0.00184	-0.16729	0.88671	-0.00345	-0.31344	0.88364	-0.00704	-0.64004	0.88364	-0.01627	-1.47899	0.90997	-0.02958	-2.68943
0.88348	-0.00184	-0.1674	0.8868	-0.00373	-0.33913	0.88348	-0.00732	-0.66556	0.88348	-0.01646	-1.49619	0.90985	-0.02963	-2.69331
0.88333	-0.00179	-0.16233	0.88671	-0.00379	-0.34479	0.88333	-0.00688	-0.62589	0.88333	-0.01651	-1.50119	0.90976	-0.0297	-2.6997
0.88318	-0.00189	-0.17176	0.88633	-0.00354	-0.32157	0.88318	-0.00722	-0.65641	0.88318	-0.01643	-1.49397	0.9096	-0.02969	-2.69914
0.88303	-0.00174	-0.15825	0.88607	-0.00342	-0.31133	0.88303	-0.00716	-0.65113	0.88303	-0.01628	-1.47983	0.90946	-0.02971	-2.70053
0.88287	-0.00193	-0.17586	0.88614	-0.00367	-0.33331	0.88287	-0.00692	-0.62922	0.88287	-0.0162	-1.47289	0.90917	-0.02954	-2.68582
0.88272	-0.0017	-0.15445	0.88613	-0.00383	-0.34776	0.88272	-0.00731	-0.66473	0.88272	-0.0162	-1.47261	0.90898	-0.0295	-2.68194
0.88257	-0.00198	-0.1798	0.8858	-0.00363	-0.32978	0.88257	-0.007	-0.63671	0.88257	-0.01645	-1.49508	0.9088	-0.02948	-2.67972
0.88242	-0.00167	-0.15189	0.88545	-0.00341	-0.31031	0.88242	-0.00713	-0.6478	0.88242	-0.0167	-1.51839	0.90852	-0.02933	-2.66668
0.88226	-0.002	-0.18177	0.88548	-0.00361	-0.32809	0.88226	-0.0073	-0.66362	0.88226	-0.01657	-1.50646	0.90843	-0.0294	-2.67251
0.88211	-0.00166	-0.15062	0.88552	-0.00383	-0.34848	0.88211	-0.00695	-0.63144	0.88211	-0.01643	-1.4937	0.90826	-0.02938	-2.67112
0.88196	-0.00199	-0.18133	0.88524	-0.00369	-0.33544	0.88196	-0.00731	-0.66417	0.88196	-0.01625	-1.47733	0.90816	-0.02944	-2.67639
0.88181	-0.00166	-0.15112	0.88488	-0.00345	-0.31383	0.88181	-0.00708	-0.64337	0.88181	-0.01617	-1.47039	0.90808	-0.02952	-2.68333
0.88165	-0.00199	-0.18102	0.88481	-0.00355	-0.32265	0.88165	-0.00702	-0.63782	0.88165	-0.01634	-1.48565	0.90813	-0.02975	-2.70413
0.8815	-0.00168	-0.15306	0.88489	-0.00381	-0.34646	0.8815	-0.00734	-0.66723	0.8815	-0.01648	-1.49814	0.90798	-0.02975	-2.70469
0.88135	-0.00196	-0.17861	0.88471	-0.00377	-0.3431	0.88135	-0.00692	-0.62866	0.88135	-0.01657	-1.50618	0.90799	-0.02994	-2.72189
0.8812	-0.00168	-0.15287	0.88424	-0.00343	-0.31147	0.8812	-0.00716	-0.65086	0.8812	-0.01648	-1.49841	0.90767	-0.02975	-2.70441
0.88104	-0.00188	-0.17093	0.8841	-0.00343	-0.31186	0.88104	-0.00717	-0.65224	0.88104	-0.01624	-1.47594	0.90758	-0.02982	-2.71052
0.88089	-0.00174	-0.15791	0.88421	-0.00373	-0.33938	0.88089	-0.0069	-0.627	0.88089	-0.01614	-1.46734	0.90728	-0.02965	-2.69581
0.88074	-0.00186	-0.16871	0.88409	-0.00376	-0.34213	0.88074	-0.00733	-0.66667	0.88074	-0.01617	-1.46956	0.9071	-0.02962	-2.69276
0.88058	-0.00179	-0.16316	0.8837	-0.0035	-0.31852	0.88058	-0.007	-0.63671	0.88058	-0.0164	-1.49064	0.9069	-0.02956	-2.68749
0.88043	-0.0018	-0.16338	0.88349	-0.00343	-0.31208	0.88043	-0.00706	-0.64142	0.88043	-0.01661	-1.51007	0.90668	-0.02949	-2.68083
0.88028	-0.00186	-0.16946	0.88356	-0.00369	-0.33517	0.88028	-0.00732	-0.66528	0.88028	-0.01659	-1.50812	0.90654	-0.0295	-2.68194
0.88013	-0.00176	-0.15961	0.88353	-0.00382	-0.34735	0.88013	-0.0069	-0.62755	0.88013	-0.01647	-1.4973	0.9063	-0.02941	-2.67389
0.87997	-0.00191	-0.17389	0.88318	-0.0036	-0.32726	0.87997	-0.00722	-0.65668	0.87997	-0.01626	-1.47844	0.90624	-0.02952	-2.68333
0.87982	-0.00172	-0.15678	0.88287	-0.00342	-0.31097	0.87982	-0.00715	-0.65002	0.87982	-0.01623	-1.47566	0.90618	-0.02961	-2.69193
0.87967	-0.00196	-0.17789	0.8829	-0.00363	-0.33009	0.87967	-0.00695	-0.63199	0.87967	-0.01636	-1.48732	0.9062	-0.02981	-2.71024
0.87952	-0.00168	-0.15314	0.88294	-0.00385	-0.34968	0.87952	-0.00731	-0.66473	0.87952	-0.0165	-1.4998	0.90606	-0.02982	-2.71107
0.87936	-0.00199	-0.18119	0.88263	-0.00367	-0.33331	0.87936	-0.00701	-0.63699	0.87936	-0.01658	-1.50729	0.90614	-0.03009	-2.73521
0.87921	-0.00166	-0.15109	0.88227	-0.00344	-0.31253	0.87921	-0.00717	-0.65141	0.87921	-0.0166	-1.50868	0.90582	-0.0299	-2.71773
0.87906	-0.00201	-0.18236	0.88224	-0.00358	-0.32512	0.87906	-0.00729	-0.66251	0.87906	-0.01633	-1.48454	0.90571	-0.02995	-2.72272
0.87891	-0.00168	-0.1525	0.88231	-0.00382	-0.34768	0.87891	-0.00696	-0.63282	0.87891	-0.01613	-1.46623	0.90546	-0.02983	-2.7119
0.87875	-0.002	-0.18144	0.88208	-0.00374	-0.34019	0.87875	-0.00736	-0.66944	0.87875	-0.01624	-1.47677	0.90527	-0.02979	-2.70857
0.8786	-0.00168	-0.15231	0.8817	-0.00348	-0.31666	0.8786	-0.00708	-0.64364	0.8786	-0.01644	-1.49453	0.90502	-0.02969	-2.69886
0.87845	-0.00198	-0.18044	0.88156	-0.00349	-0.31772	0.87845	-0.00705	-0.64115	0.87845	-0.01663	-1.51145	0.90484	-0.02965	-2.69526
0.8783	-0.00172	-0.15594	0.88168	-0.0038	-0.34563	0.8783	-0.00736	-0.66917	0.8783	-0.01671	-1.51867	0.9047	-0.02966	-2.69664
0.87814	-0.00194	-0.17634	0.88154	-0.00381	-0.3466	0.87814	-0.00693	-0.62977	0.87814	-0.01654	-1.50396	0.90446	-0.02957	-2.68777
0.87799	-0.00176	-0.16041	0.88113	-0.00352	-0.32016	0.87799	-0.00725	-0.6589	0.87799	-0.0164	-1.49064	0.9044	-0.02967	-2.6972
0.87784	-0.00191	-0.17367	0.88095	-0.00349	-0.31741	0.87784	-0.00723	-0.65724	0.87784	-0.01634	-1.4851	0.90433	-0.02976	-2.70552
0.87769	-0.00181	-0.1643	0.88103	-0.00376	-0.34146	0.87769	-0.00695	-0.63171	0.87769	-0.01639	-1.49009	0.90429	-0.0299	-2.71801
0.87753	-0.00186	-0.16873	0.88095	-0.00384	-0.3489	0.87753	-0.00739	-0.67166	0.87753	-0.01661	-1.51034	0.90417	-0.02993	-2.72134
0.87738	-0.00186	-0.16951	0.88058	-0.0036	-0.32718	0.87738	-0.00707	-0.64309	0.87738	-0.0167	-1.51783	0.90427	-0.03022	-2.74714
0.87723	-0.0018	-0.16346	0.88031	-0.00346	-0.31483	0.87723	-0.00713	-0.6478	0.87723	-0.01668	-1.51672	0.90395	-0.03003	-2.72966
0.87708	-0.00191	-0.17401	0.88035	-0.00368	-0.33444	0.87708	-0.00736	-0.66917	0.87708	-0.01647	-1.4973	0.90383	-0.03007	-2.73327
0.87692	-0.00176	-0.15966	0.88038	-0.00388	-0.35292	0.87692	-0.00698	-0.63477	0.87692	-0.01622	-1.47455	0.90364	-0.03002	-2.72938
0.87677	-0.00196	-0.17828	0.88004	-0.00368	-0.33425	0.87677	-0.00729	-0.66306	0.87677	-0.01635	-1.48593	0.90343	-0.02995	-2.723
0.87662	-0.00172	-0.15644	0.87969	-0.00346	-0.31425	0.87662	-0.0072	-0.65419	0.87662	-0.01648	-1.49786	0.90313	-0.02979	-2.7083
0.87646	-0.002	-0.18158	0.8797	-0.00363	-0.33001	0.87646	-0.00703	-0.63893	0.87646	-0.01669	-1.51728	0.90295	-0.02976	-2.70552
0.87631	-0.00169	-0.15353	0.87974	-0.00386	-0.35059	0.87631	-0.00737	-0.67	0.87631	-0.01676	-1.52338	0.90282	-0.02978	-2.70746
0.87616	-0.00202	-0.18385	0.87949	-0.00375	-0.34049	0.87616	-0.00702	-0.63782	0.87616	-0.0166	-1.50923	0.90261	-0.02972	-2.70219
0.87601	-0.00169	-0.1532	0.87911	-0.00349	-0.31744	0.87601	-0.00724	-0.65807	0.87601	-0.0165	-1.4998	0.90251	-0.02977	-2.70663
0.87585	-0.00202	-0.18363	0.87902	-0.00356	-0.32376	0.87585	-0.00733	-0.66612	0.87585	-0.01642	-1.49286	0.90249	-0.02993	-2.72106
0.8757	-0.00169	-0.15359	0.87912	-0.00384	-0.34912	0.8757	-0.007	-0.63643	0.8757	-0.01643	-1.4937	0.9024	-0.03	-2.72744
0.87555	-0.00201	-0.18299	0.87896	-0.00383	-0.34832	0.87555	-0.00743	-0.67583	0.87555	-0.01671	-1.51867	0.9023	-0.03006	-2.73243
0.8754	-0.00171	-0.15542	0.87853	-0.00352	-0.32038	0.8754	-0.00714	-0.64864	0.8754	-0.01685	-1.5317	0.90239	-0.03033	-2.75685
0.87524	-0.00198	-0.17989	0.87837	-0.00352	-0.3196	0.87524	-0.00712	-0.64725	0.87524	-0.01679	-1.52671	0.90211	-0.03018	-2.74381
0.87509	-0.00177	-0.16049	0.87848	-0.00381	-0.34607	0.87509	-0.00742	-0.67416	0.87509	-0.0166	-1.50923	0.90194	-0.03017	-2.7427
0.87494	-0.00193	-0.17581	0.87837	-0.00385	-0.34998	0.87494	-0.00698	-0.63477	0.87494	-0.0164	-1.4912	0.9018	-0.03018	-2.74353
0.87479	-0.0018	-0.16393	0.87798	-0.00359	-0.32604	0.87479	-0.00731	-0.66445	0.87479	-0.01638	-1.48926	0.90159	-0.03011	-2.7377
0.87463	-0.0019	-0.17267	0.87775	-0.0035	-0.31802	0.87463	-0.00728	-0.66168	0.87463	-0.01654	-1.50341	0.90127	-0.02993	-2.7205
0.87448	-0.00186	-0.16887	0.8778	-0.00373	-0.33902	0.87448	-0.00701	-0.63726	0.87448	-0.01673	-1.52061	0.90111	-0.02992	-2.72023
0.87433	-0.00184	-0.16721	0.87779	-0.00389	-0.35395	0.87433	-0.00743	-0.67527	0.87433	-0.01679	-1.52643	0.90089	-0.02984	-2.71274
0.87418	-0.00192	-0.17426	0.87746	-0.00369	-0.33503	0.87418	-0.00712	-0.64725	0.87418	-0.01668	-1.51645	0.90079	-0.0299	-2.71856
0.87402	-0.00179	-0.16313	0.87712	-0.00348	-0.31658	0.87402	-0.0072	-0.65419	0.87402	-0.01654	-1.50368	0.90063	-0.0299	-2.71773
0.87387	-0.002	-0.18191	0.87719	-0.00373	-0.33944	0.87387	-0.00746	-0.67832	0.87387	-0.01653	-1.5023	0.90069	-0.03014	-2.73965
0.87372	-0.00178	-0.16194	0.87723	-0.00394	-0.35836	0.87372	-0.00711	-0.64614	0.87372	-0.01652	-1.50146	0.90058	-0.03018	-2.74409
0.87357	-0.00203	-0.18444	0.87693	-0.00378	-0.34321	0.87357	-0.00741	-0.67361	0.87357	-0.01677	-1.52449	0.90049	-0.03025	-2.75019
0.87341	-0.00174	-0.15811	0.87657	-0.00354	-0.32221	0.87341	-0.00727	-0.66057	0.87341	-0.01703	-1.54835	0.90046	-0.03039	-2.7624
0.87326	-0.00205	-0.18663	0.87651	-0.00365	-0.33198	0.87326	-0.00714	-0.64864	0.87326	-0.01689	-1.53531	0.90029	-0.03036	-2.76045
0.87311	-0.00172	-0.156	0.87658	-0.0039	-0.35484	0.87311	-0.00747	-0.67943	0.87311	-0.01673	-1.52089	0.90019	-0.03043	-2.766
0.87296	-0.00205	-0.18638	0.87638	-0.00385	-0.34973	0.87296	-0.00707	-0.64281	0.87296	-0.01655	-1.50424	0.89999	-0.03038	-2.76184
0.8728	-0.00172	-0.15614	0.87597	-0.00356	-0.32357	0.8728	-0.00735	-0.66806	0.8728	-0.01647	-1.4973	0.89978	-0.03031	-2.75574
0.87265	-0.00204	-0.18585	0.87583	-0.00357	-0.32479	0.87265	-0.00739	-0.67166	0.87265	-0.01665	-1.51367	0.89945	-0.03012	-2.73798
0.8725	-0.00172	-0.15653	0.87595	-0.00388	-0.35234	0.8725	-0.00708	-0.64364	0.8725	-0.01678	-1.52532	0.89933	-0.03015	-2.74048
0.87234	-0.00202	-0.18397	0.87581	-0.00389	-0.35348	0.87234	-0.00753	-0.68415	0.87234	-0.01686	-1.53281	0.899	-0.02995	-2.72272
0.87219	-0.00176	-0.15955	0.8754	-0.00361	-0.32804	0.87219	-0.00722	-0.65613	0.87219	-0.01683	-1.53032	0.899	-0.03012	-2.73826
0.87204	-0.00197	-0.17944	0.8752	-0.00355	-0.32246	0.87204	-0.00721	-0.6553	0.87204	-0.0166	-1.50868	0.8988	-0.03006	-2.73299
0.87189	-0.0018	-0.16377	0.87527	-0.0038	-0.3456	0.87189	-0.0075	-0.68221	0.87189	-0.01652	-1.50174	0.89881	-0.03025	-2.74963
0.87173	-0.00194	-0.17631	0.87523	-0.00393	-0.35689	0.87173	-0.00707	-0.64253	0.87173	-0.01654	-1.50368	0.89871	-0.0303	-2.75491
0.87158	-0.00184	-0.16743	0.87487	-0.00369	-0.33586	0.87158	-0.00739	-0.67222	0.87158	-0.01676	-1.52338	0.89864	-0.0304	-2.76406
0.87143	-0.00187	-0.17001	0.87456	-0.00351	-0.31944	0.87143	-0.00733	-0.66639	0.87143	-0.01699	-1.54447	0.89855	-0.03047	-2.76989
0.87128	-0.00191	-0.17345	0.87459	-0.00373	-0.33891	0.87128	-0.00709	-0.64448	0.87128	-0.01694	-1.53975	0.8984	-0.03048	-2.771
0.87112	-0.00182	-0.16557	0.87463	-0.00394	-0.35797	0.87112	-0.00748	-0.67999	0.87112	-0.01682	-1.52865	0.89837	-0.03062	-2.7832
0.87097	-0.00195	-0.1777	0.87431	-0.00375	-0.34108	0.87097	-0.00719	-0.65363	0.87097	-0.01661	-1.51034	0.89812	-0.0305	-2.77294
0.87082	-0.00178	-0.16183	0.87396	-0.00352	-0.32032	0.87082	-0.00729	-0.66251	0.87082	-0.01656	-1.50563	0.89792	-0.03045	-2.7685
0.87067	-0.002	-0.18144	0.87394	-0.00368	-0.33431	0.87067	-0.00747	-0.67888	0.87067	-0.01671	-1.51867	0.89763	-0.03029	-2.7538
0.87051	-0.00174	-0.15836	0.874	-0.00391	-0.3557	0.87051	-0.00712	-0.64753	0.87051	-0.01683	-1.53004	0.8975	-0.03032	-2.75601
0.87036	-0.00203	-0.18455	0.87376	-0.00382	-0.34721	0.87036	-0.00746	-0.6786	0.87036	-0.01692	-1.53809	0.8971	-0.03004	-2.73105
0.87021	-0.00171	-0.15564	0.87337	-0.00355	-0.32296	0.87021	-0.00726	-0.66001	0.87021	-0.01693	-1.53892	0.89714	-0.03026	-2.75102
0.87006	-0.00205	-0.18671	0.87326	-0.0036	-0.32731	0.87006	-0.00718	-0.6528	0.87006	-0.01666	-1.51478	0.89696	-0.03023	-2.74852
0.8699	-0.00171	-0.15561	0.87337	-0.0039	-0.35417	0.8699	-0.00749	-0.6811	0.8699	-0.01647	-1.49703	0.8969	-0.03034	-2.75796
0.86975	-0.00205	-0.1863	0.87323	-0.0039	-0.35489	0.86975	-0.00708	-0.64364	0.86975	-0.01659	-1.50785	0.89682	-0.03042	-2.76517
0.8696	-0.00172	-0.15658	0.8728	-0.0036	-0.3269	0.8696	-0.00738	-0.67111	0.8696	-0.01678	-1.52532	0.8968	-0.03056	-2.77821
0.86945	-0.00204	-0.18513	0.87262	-0.00357	-0.32421	0.86945	-0.0074	-0.67305	0.86945	-0.01696	-1.54169	0.8967	-0.03063	-2.78431
0.86929	-0.00174	-0.15825	0.87272	-0.00385	-0.34995	0.86929	-0.0071	-0.64559	0.86929	-0.01702	-1.54752	0.89655	-0.03062	-2.78404
0.86914	-0.002	-0.18208	0.87263	-0.00392	-0.35628	0.86914	-0.00755	-0.68609	0.86914	-0.01689	-1.53559	0.89649	-0.03073	-2.79347
0.86899	-0.00179	-0.16269	0.87225	-0.00366	-0.33275	0.86899	-0.00722	-0.65613	0.86899	-0.01672	-1.52033	0.89628	-0.03067	-2.78792
0.86884	-0.00196	-0.17811	0.87199	-0.00354	-0.3219	0.86884	-0.00725	-0.65946	0.86884	-0.01665	-1.51395	0.89603	-0.03055	-2.77765
0.86868	-0.00183	-0.16652	0.87204	-0.00377	-0.34249	0.86868	-0.00753	-0.68498	0.86868	-0.01672	-1.52033	0.89579	-0.03045	-2.7685
0.86853	-0.00192	-0.17459	0.87205	-0.00395	-0.35919	0.86853	-0.00709	-0.64475	0.86853	-0.01693	-1.53892	0.89565	-0.03047	-2.77044
0.86838	-0.00189	-0.17181	0.87172	-0.00375	-0.34096	0.86838	-0.00742	-0.67499	0.86838	-0.01699	-1.54474	0.89526	-0.03021	-2.7463
0.86823	-0.00186	-0.16893	0.87137	-0.00354	-0.32166	0.86823	-0.00736	-0.66944	0.86823	-0.01701	-1.54669	0.89527	-0.03039	-2.76295
0.86807	-0.00195	-0.17686	0.87138	-0.00371	-0.33758	0.86807	-0.00714	-0.64864	0.86807	-0.01678	-1.52588	0.89513	-0.0304	-2.76351
0.86792	-0.00181	-0.16443	0.87143	-0.00395	-0.35864	0.86792	-0.00751	-0.68248	0.86792	-0.01654	-1.50396	0.895	-0.03043	-2.76656
0.86777	-0.00199	-0.18086	0.87116	-0.00381	-0.34621	0.86777	-0.0072	-0.65446	0.86777	-0.01666	-1.51478	0.89494	-0.03053	-2.77544
0.86761	-0.00177	-0.16102	0.87079	-0.00357	-0.32426	0.86761	-0.00734	-0.6675	0.86761	-0.01681	-1.5281	0.89494	-0.03071	-2.79153
0.86746	-0.00202	-0.18363	0.87071	-0.00365	-0.33162	0.86746	-0.00748	-0.67999	0.86746	-0.017	-1.54585	0.89484	-0.03076	-2.79624
0.86731	-0.00173	-0.15758	0.87079	-0.00391	-0.35572	0.86731	-0.00715	-0.64975	0.86731	-0.01708	-1.55279	0.89473	-0.03081	-2.80068
0.86716	-0.00206	-0.18691	0.87062	-0.00389	-0.35375	0.86716	-0.00753	-0.68443	0.86716	-0.01692	-1.53836	0.89459	-0.03083	-2.80235
0.867	-0.00172	-0.15636	0.8702	-0.00359	-0.32679	0.867	-0.00728	-0.66195	0.867	-0.01681	-1.52838	0.89445	-0.03083	-2.80318
0.86685	-0.00206	-0.18732	0.87004	-0.00358	-0.32543	0.86685	-0.00722	-0.65668	0.86685	-0.01671	-1.51922	0.89416	-0.03069	-2.78958
0.8667	-0.00173	-0.15694	0.87015	-0.00388	-0.35287	0.8667	-0.00753	-0.68498	0.8667	-0.01674	-1.52227	0.89395	-0.03062	-2.78404
0.86655	-0.00205	-0.18632	0.87004	-0.00393	-0.35683	0.86655	-0.0071	-0.64503	0.86655	-0.01701	-1.54669	0.89379	-0.03061	-2.78237
0.86639	-0.00174	-0.15803	0.86964	-0.00365	-0.33189	0.86639	-0.00742	-0.67499	0.86639	-0.01714	-1.55834	0.89347	-0.03042	-2.76572
0.86624	-0.00203	-0.1841	0.86942	-0.00357	-0.32493	0.86624	-0.00742	-0.67472	0.86624	-0.01711	-1.55556	0.89339	-0.03051	-2.77349
0.86609	-0.00178	-0.16158	0.86948	-0.00381	-0.34632	0.86609	-0.00713	-0.64808	0.86609	-0.01689	-1.53587	0.89325	-0.03051	-2.77405
0.86594	-0.00199	-0.18053	0.86945	-0.00395	-0.35941	0.86594	-0.00757	-0.68859	0.86594	-0.0167	-1.51811	0.89312	-0.03055	-2.7771
0.86578	-0.00182	-0.16552	0.86911	-0.00374	-0.34024	0.86578	-0.00724	-0.65835	0.86578	-0.0167	-1.51839	0.89305	-0.03064	-2.78515
0.86563	-0.00195	-0.17717	0.86879	-0.00354	-0.32227	0.86563	-0.0073	-0.6639	0.86563	-0.01684	-1.53115	0.89309	-0.03085	-2.80457
0.86548	-0.00187	-0.16957	0.86882	-0.00375	-0.34102	0.86548	-0.00754	-0.68581	0.86548	-0.01705	-1.54974	0.89294	-0.03086	-2.8054
0.86533	-0.00188	-0.17112	0.86886	-0.00397	-0.36091	0.86533	-0.00716	-0.65058	0.86533	-0.0171	-1.55418	0.89293	-0.03102	-2.81955
0.86517	-0.00193	-0.17584	0.86856	-0.00381	-0.34601	0.86517	-0.00746	-0.67805	0.86517	-0.01698	-1.54363	0.89269	-0.03092	-2.81067
0.86502	-0.00184	-0.16693	0.8682	-0.00357	-0.32473	0.86502	-0.00739	-0.67166	0.86502	-0.01686	-1.53254	0.89258	-0.03097	-2.81539
0.86487	-0.00198	-0.17997	0.86816	-0.0037	-0.33614	0.86487	-0.0072	-0.65419	0.86487	-0.01679	-1.52643	0.89228	-0.0308	-2.8004
0.86472	-0.0018	-0.16324	0.86823	-0.00394	-0.35853	0.86472	-0.00754	-0.68554	0.86472	-0.01678	-1.52588	0.8921	-0.03076	-2.7968
0.86456	-0.00202	-0.18397	0.86802	-0.00388	-0.35306	0.86456	-0.00721	-0.6553	0.86456	-0.01703	-1.5478	0.8919	-0.03072	-2.79236
0.86441	-0.00176	-0.16016	0.86762	-0.00361	-0.32812	0.86441	-0.0074	-0.67277	0.86441	-0.01727	-1.57027	0.89168	-0.03064	-2.78542
0.86426	-0.00206	-0.18738	0.86748	-0.00362	-0.32887	0.86426	-0.0075	-0.68137	0.86426	-0.01715	-1.55917	0.89154	-0.03065	-2.78625
0.86411	-0.00173	-0.15758	0.8676	-0.00392	-0.35664	0.86411	-0.00717	-0.65197	0.86411	-0.01699	-1.54419	0.89132	-0.03058	-2.7796
0.86395	-0.00207	-0.18774	0.86745	-0.00393	-0.35725	0.86395	-0.00759	-0.68997	0.86395	-0.0168	-1.52754	0.89126	-0.03068	-2.78903
0.8638	-0.00173	-0.15694	0.86705	-0.00365	-0.33153	0.8638	-0.0073	-0.66334	0.8638	-0.01673	-1.52089	0.89115	-0.03073	-2.79402
0.86365	-0.00206	-0.18771	0.86685	-0.0036	-0.32759	0.86365	-0.00727	-0.66112	0.86365	-0.0169	-1.53642	0.8912	-0.03096	-2.81428
0.86349	-0.00174	-0.15789	0.86693	-0.00386	-0.35095	0.86349	-0.00758	-0.68886	0.86349	-0.01703	-1.54807	0.89104	-0.03095	-2.81344
0.86334	-0.00206	-0.18682	0.86687	-0.00396	-0.36002	0.86334	-0.00715	-0.64975	0.86334	-0.01711	-1.55584	0.89111	-0.0312	-2.83675
0.86319	-0.00177	-0.16099	0.86651	-0.00373	-0.33866	0.86319	-0.00746	-0.6786	0.86319	-0.01708	-1.55279	0.89079	-0.03102	-2.81955
0.86304	-0.00201	-0.18316	0.86621	-0.00357	-0.32435	0.86304	-0.00744	-0.67638	0.86304	-0.01686	-1.53281	0.8907	-0.03109	-2.82593
0.86288	-0.00181	-0.16499	0.86625	-0.00379	-0.34413	0.86288	-0.00717	-0.65197	0.86288	-0.01678	-1.52532	0.89043	-0.03095	-2.81344
0.86273	-0.00198	-0.17972	0.86628	-0.00399	-0.36291	0.86273	-0.0076	-0.69108	0.86273	-0.01679	-1.52616	0.89023	-0.0309	-2.80928
0.86258	-0.00185	-0.16862	0.86596	-0.00379	-0.3449	0.86258	-0.00728	-0.66168	0.86258	-0.01701	-1.54613	0.88999	-0.0308	-2.79985
0.86243	-0.00193	-0.17539	0.86561	-0.00357	-0.32482	0.86243	-0.00735	-0.66778	0.86243	-0.01725	-1.56833	0.88981	-0.03076	-2.7968
0.86227	-0.00192	-0.17462	0.8656	-0.00374	-0.33999	0.86227	-0.00757	-0.68803	0.86227	-0.01718	-1.56222	0.88966	-0.03077	-2.79707
0.86212	-0.00188	-0.17065	0.86565	-0.00396	-0.36011	0.86212	-0.0072	-0.65419	0.86212	-0.01706	-1.55113	0.88941	-0.03066	-2.78709
0.86197	-0.00197	-0.17892	0.8654	-0.00386	-0.3509	0.86197	-0.00751	-0.68276	0.86197	-0.01685	-1.53226	0.88937	-0.03078	-2.79846
0.86182	-0.00183	-0.16671	0.86504	-0.00362	-0.32879	0.86182	-0.0074	-0.6725	0.86182	-0.0168	-1.52754	0.88929	-0.03087	-2.80595
0.86166	-0.00199	-0.18102	0.86491	-0.00364	-0.33125	0.86166	-0.00721	-0.6553	0.86166	-0.01692	-1.53836	0.88923	-0.03098	-2.81594
0.86151	-0.00177	-0.16088	0.86501	-0.00393	-0.35747	0.86151	-0.00756	-0.68692	0.86151	-0.01705	-1.55002	0.8891	-0.03099	-2.8176
0.86136	-0.00203	-0.1848	0.86486	-0.00393	-0.35739	0.86136	-0.00718	-0.65308	0.86136	-0.01713	-1.55723	0.8892	-0.03128	-2.84396
0.86121	-0.00174	-0.15814	0.86443	-0.00363	-0.32959	0.86121	-0.00743	-0.67583	0.86121	-0.01714	-1.55862	0.88887	-0.03109	-2.82621
0.86105	-0.00207	-0.18813	0.86426	-0.0036	-0.32765	0.86105	-0.00749	-0.68054	0.86105	-0.01688	-1.5342	0.88877	-0.03114	-2.83064
0.8609	-0.00173	-0.15719	0.86437	-0.00389	-0.35395	0.8609	-0.00718	-0.6528	0.8609	-0.01672	-1.51978	0.88855	-0.03107	-2.82454
0.86075	-0.00208	-0.18868	0.86426	-0.00395	-0.359	0.86075	-0.00762	-0.69247	0.86075	-0.01679	-1.52671	0.88834	-0.031	-2.81844
0.8606	-0.00174	-0.15858	0.86389	-0.0037	-0.33661	0.8606	-0.00731	-0.66473	0.8606	-0.017	-1.54558	0.88805	-0.03085	-2.80457
0.86044	-0.00207	-0.18849	0.86364	-0.00359	-0.32621	0.86044	-0.00731	-0.66445	0.86044	-0.01719	-1.5625	0.88786	-0.0308	-2.8004
0.86029	-0.00176	-0.15963	0.86369	-0.00382	-0.34746	0.86029	-0.00761	-0.69192	0.86029	-0.01725	-1.56805	0.88773	-0.03083	-2.80318
0.86014	-0.00205	-0.1861	0.8637	-0.004	-0.36335	0.86014	-0.00717	-0.65197	0.86014	-0.01711	-1.55556	0.88752	-0.03076	-2.79652
0.85999	-0.00181	-0.16416	0.86335	-0.00378	-0.34393	0.85999	-0.00751	-0.68276	0.85999	-0.01694	-1.53975	0.88743	-0.03083	-2.80318
0.85983	-0.002	-0.18177	0.86302	-0.00358	-0.32554	0.85983	-0.00746	-0.67805	0.85983	-0.01689	-1.53503	0.88739	-0.03097	-2.81511
0.85968	-0.00184	-0.16749	0.86304	-0.00377	-0.34305	0.85968	-0.00721	-0.65502	0.85968	-0.01697	-1.54252	0.88734	-0.03108	-2.8251
0.85953	-0.00197	-0.17892	0.86309	-0.004	-0.36394	0.85953	-0.00761	-0.69219	0.85953	-0.01714	-1.55862	0.8872	-0.03109	-2.82621
0.85938	-0.00189	-0.1722	0.8628	-0.00385	-0.34984	0.85938	-0.00731	-0.66417	0.85938	-0.01722	-1.56527	0.88726	-0.03133	-2.84812
0.85922	-0.00187	-0.17009	0.86242	-0.00359	-0.32626	0.85922	-0.00735	-0.66861	0.85922	-0.0172	-1.56333	0.88698	-0.03118	-2.83481
0.85907	-0.00194	-0.17606	0.86235	-0.00368	-0.335	0.85907	-0.00756	-0.68748	0.85907	-0.01696	-1.54225	0.88682	-0.03118	-2.83453
0.85892	-0.00183	-0.16674	0.86243	-0.00394	-0.35847	0.85892	-0.00721	-0.65585	0.85892	-0.01672	-1.52005	0.88665	-0.03116	-2.83286
0.85876	-0.00198	-0.18025	0.86226	-0.00392	-0.35664	0.85876	-0.00755	-0.68609	0.85876	-0.01687	-1.53337	0.88648	-0.03114	-2.8312
0.85861	-0.0018	-0.16369	0.86184	-0.00362	-0.32945	0.85861	-0.00736	-0.66944	0.85861	-0.01702	-1.54724	0.88614	-0.03093	-2.81178
0.85846	-0.00203	-0.18494	0.86169	-0.00363	-0.3297	0.85846	-0.00726	-0.66001	0.85846	-0.0172	-1.56389	0.88597	-0.03091	-2.81011
0.85831	-0.00177	-0.16058	0.8618	-0.00392	-0.35658	0.85831	-0.00759	-0.6897	0.85831	-0.01729	-1.57166	0.88575	-0.03084	-2.80346
0.85815	-0.00207	-0.18832	0.86167	-0.00395	-0.35928	0.85815	-0.0072	-0.65419	0.85815	-0.01712	-1.5564	0.88564	-0.03089	-2.80789
0.858	-0.00174	-0.15858	0.86129	-0.00369	-0.33547	0.858	-0.00748	-0.67971	0.858	-0.01701	-1.54641	0.88549	-0.03089	-2.80817
0.85785	-0.00209	-0.18968	0.86107	-0.00362	-0.32923	0.85785	-0.00751	-0.68276	0.85785	-0.01693	-1.5392	0.88549	-0.03106	-2.82343
0.8577	-0.00175	-0.15905	0.86114	-0.00387	-0.35184	0.8577	-0.00721	-0.65502	0.8577	-0.01696	-1.54169	0.88539	-0.03112	-2.8287
0.85754	-0.00208	-0.18943	0.8611	-0.004	-0.36333	0.85754	-0.00765	-0.6958	0.85754	-0.01721	-1.56472	0.88529	-0.03118	-2.83425
0.85739	-0.00176	-0.15972	0.86075	-0.00378	-0.3433	0.85739	-0.00734	-0.66723	0.85739	-0.01733	-1.57582	0.88528	-0.03134	-2.84895
0.85724	-0.00207	-0.18799	0.86044	-0.00359	-0.32679	0.85724	-0.00735	-0.66861	0.85724	-0.01731	-1.57387	0.8851	-0.0313	-2.84563
0.85709	-0.00179	-0.1628	0.86047	-0.0038	-0.3456	0.85709	-0.00763	-0.69386	0.85709	-0.0171	-1.55418	0.88497	-0.03134	-2.84868
0.85693	-0.00203	-0.18438	0.86051	-0.00401	-0.36488	0.85693	-0.00721	-0.65557	0.85693	-0.01689	-1.53559	0.8848	-0.03131	-2.84646
0.85678	-0.00183	-0.16679	0.8602	-0.00384	-0.34895	0.85678	-0.00754	-0.68526	0.85678	-0.01691	-1.53698	0.88459	-0.03125	-2.84063
0.85663	-0.00199	-0.18111	0.85985	-0.00362	-0.32892	0.85663	-0.00747	-0.67943	0.85663	-0.01704	-1.54891	0.88426	-0.03105	-2.82232
0.85648	-0.00188	-0.17101	0.85982	-0.00375	-0.3411	0.85648	-0.00726	-0.66001	0.85648	-0.01725	-1.56805	0.88411	-0.03105	-2.82315
0.85632	-0.00194	-0.17675	0.85988	-0.004	-0.36333	0.85632	-0.00762	-0.69303	0.85632	-0.0173	-1.57249	0.88381	-0.03089	-2.80789
0.85617	-0.00194	-0.17628	0.85966	-0.00392	-0.35595	0.85617	-0.00733	-0.66639	0.85617	-0.0172	-1.56389	0.88378	-0.03103	-2.82066
0.85602	-0.00189	-0.17143	0.85927	-0.00365	-0.33195	0.85602	-0.00744	-0.6761	0.85602	-0.01707	-1.55196	0.8836	-0.03099	-2.81733
0.85587	-0.00199	-0.18114	0.85913	-0.00367	-0.33386	0.85587	-0.00761	-0.69164	0.85587	-0.017	-1.5453	0.88362	-0.03118	-2.83481
0.85571	-0.00184	-0.1676	0.85926	-0.00398	-0.36191	0.85571	-0.00727	-0.66112	0.85571	-0.017	-1.5453	0.88351	-0.03124	-2.8398
0.85556	-0.00204	-0.1856	0.85911	-0.00399	-0.36255	0.85556	-0.00763	-0.6933	0.85556	-0.01725	-1.5686	0.88344	-0.03132	-2.84757
0.85541	-0.0018	-0.16407	0.85869	-0.00369	-0.33578	0.85541	-0.0074	-0.67277	0.85541	-0.01748	-1.58913	0.88335	-0.03139	-2.85367
0.85526	-0.00208	-0.18877	0.85851	-0.00366	-0.33228	0.85526	-0.00734	-0.66723	0.85526	-0.01737	-1.57942	0.88321	-0.03141	-2.85534
0.8551	-0.00177	-0.1613	0.8586	-0.00393	-0.35725	0.8551	-0.00765	-0.6958	0.8551	-0.01719	-1.56278	0.88317	-0.03154	-2.86727
0.85495	-0.00211	-0.19148	0.85852	-0.00401	-0.36482	0.85495	-0.00723	-0.65724	0.85495	-0.01701	-1.54641	0.88292	-0.03143	-2.85728
0.8548	-0.00177	-0.16055	0.85815	-0.00377	-0.34277	0.8548	-0.00754	-0.68581	0.8548	-0.01695	-1.54058	0.88272	-0.03137	-2.85201
0.85464	-0.00209	-0.19035	0.85787	-0.00363	-0.32978	0.85464	-0.00756	-0.68692	0.85464	-0.01711	-1.55584	0.88241	-0.0312	-2.83647
0.85449	-0.00177	-0.16066	0.85792	-0.00385	-0.34995	0.85449	-0.00726	-0.66001	0.85449	-0.01727	-1.56999	0.88227	-0.03121	-2.8373
0.85434	-0.00209	-0.19043	0.85793	-0.00403	-0.3666	0.85434	-0.0077	-0.70024	0.85434	-0.01734	-1.57637	0.8819	-0.03097	-2.81511
0.85419	-0.00179	-0.16271	0.85761	-0.00385	-0.34998	0.85419	-0.00738	-0.67083	0.85419	-0.0173	-1.57304	0.88193	-0.03118	-2.83425
0.85403	-0.00206	-0.18749	0.85726	-0.00362	-0.32903	0.85403	-0.00741	-0.67388	0.85403	-0.01708	-1.55307	0.88175	-0.03114	-2.83064
0.85388	-0.00184	-0.16704	0.85727	-0.0038	-0.34565	0.85388	-0.00768	-0.69802	0.85388	-0.01702	-1.54724	0.88171	-0.03127	-2.84257
0.85373	-0.00202	-0.18327	0.85731	-0.00402	-0.36555	0.85373	-0.00727	-0.66112	0.85373	-0.01702	-1.54752	0.88163	-0.03134	-2.84951
0.85358	-0.00187	-0.17007	0.85705	-0.00391	-0.35511	0.85358	-0.00759	-0.68997	0.85358	-0.01725	-1.56777	0.88158	-0.03147	-2.86061
0.85342	-0.00198	-0.17961	0.85668	-0.00366	-0.33272	0.85342	-0.00752	-0.68332	0.85342	-0.01749	-1.59024	0.88149	-0.03153	-2.86671
0.85327	-0.00193	-0.17548	0.85659	-0.00373	-0.33927	0.85327	-0.00731	-0.66473	0.85327	-0.0174	-1.58192	0.88133	-0.03153	-2.86616
0.85312	-0.00192	-0.1742	0.85668	-0.004	-0.36407	0.85312	-0.00767	-0.69719	0.85312	-0.01727	-1.56999	0.88128	-0.03165	-2.87698
0.85297	-0.00199	-0.18061	0.85652	-0.00399	-0.36316	0.85297	-0.00736	-0.66889	0.85297	-0.01707	-1.55168	0.88106	-0.03157	-2.87004
0.85281	-0.00187	-0.17018	0.8561	-0.00369	-0.33586	0.85281	-0.00751	-0.68276	0.85281	-0.01702	-1.54696	0.88083	-0.03148	-2.86199
0.85266	-0.00203	-0.18471	0.85593	-0.00368	-0.3342	0.85266	-0.00764	-0.69441	0.85266	-0.01718	-1.56167	0.88059	-0.03138	-2.85256
0.85251	-0.00183	-0.16646	0.85604	-0.00397	-0.36066	0.85251	-0.00731	-0.66445	0.85251	-0.01729	-1.57193	0.88044	-0.03138	-2.85256
0.85236	-0.00206	-0.18735	0.85593	-0.00402	-0.36538	0.85236	-0.00771	-0.70079	0.85236	-0.01739	-1.58053	0.88004	-0.0311	-2.82759
0.8522	-0.00179	-0.16316	0.85554	-0.00375	-0.34088	0.8522	-0.00743	-0.67555	0.8522	-0.01738	-1.58026	0.88006	-0.0313	-2.84535
0.85205	-0.0021	-0.19071	0.85531	-0.00366	-0.33281	0.85205	-0.00739	-0.67222	0.85205	-0.01712	-1.55667	0.87989	-0.03128	-2.84396
0.8519	-0.00182	-0.16552	0.85542	-0.00395	-0.35944	0.8519	-0.00776	-0.70551	0.8519	-0.01704	-1.54918	0.87985	-0.03141	-2.85534
0.85175	-0.00215	-0.19576	0.8554	-0.00411	-0.37326	0.85175	-0.00733	-0.66667	0.85175	-0.01711	-1.55501	0.87977	-0.03149	-2.86255
0.85159	-0.00181	-0.16488	0.85505	-0.00389	-0.35331	0.85159	-0.00764	-0.69469	0.85159	-0.01732	-1.57443	0.87979	-0.03169	-2.88058
0.85144	-0.00214	-0.19481	0.85472	-0.00369	-0.33508	0.85144	-0.00763	-0.69386	0.85144	-0.01752	-1.59246	0.87967	-0.03172	-2.88363
0.85129	-0.00182	-0.16502	0.85473	-0.00387	-0.35206	0.85129	-0.00735	-0.66778	0.85129	-0.01754	-1.59468	0.87953	-0.03173	-2.88474
0.85114	-0.00212	-0.19234	0.85478	-0.0041	-0.37234	0.85114	-0.00779	-0.70773	0.85114	-0.0174	-1.5822	0.87944	-0.03181	-2.89168
0.85098	-0.00184	-0.16696	0.85448	-0.00393	-0.35761	0.85098	-0.00746	-0.67832	0.85098	-0.01722	-1.56583	0.87926	-0.03177	-2.88863
0.85083	-0.00207	-0.18782	0.85413	-0.00371	-0.33691	0.85083	-0.00751	-0.68304	0.85083	-0.01717	-1.56111	0.87898	-0.03163	-2.87559
0.85068	-0.00189	-0.17137	0.85406	-0.0038	-0.3459	0.85068	-0.00774	-0.70385	0.85068	-0.01728	-1.57082	0.87878	-0.03158	-2.87087
0.85052	-0.00203	-0.18449	0.85414	-0.00406	-0.36899	0.85052	-0.00736	-0.66944	0.85052	-0.01744	-1.58525	0.87862	-0.03156	-2.86948
0.85037	-0.00192	-0.17417	0.85394	-0.00401	-0.36471	0.85037	-0.00768	-0.69802	0.85037	-0.01751	-1.59163	0.87828	-0.03135	-2.85034
0.85022	-0.00197	-0.17936	0.85353	-0.00372	-0.33819	0.85022	-0.00757	-0.68831	0.85022	-0.01752	-1.59246	0.87823	-0.03147	-2.86061
0.85007	-0.00198	-0.17964	0.85338	-0.00373	-0.33866	0.85007	-0.0074	-0.67305	0.85007	-0.01728	-1.5711	0.87808	-0.03147	-2.86088
0.84991	-0.00191	-0.17326	0.8535	-0.00403	-0.36646	0.84991	-0.00775	-0.70468	0.84991	-0.01705	-1.55002	0.87794	-0.03149	-2.86255
0.84976	-0.00203	-0.18424	0.85337	-0.00405	-0.36857	0.84976	-0.00739	-0.67222	0.84976	-0.01717	-1.56111	0.87787	-0.03158	-2.87087
0.84961	-0.00187	-0.16982	0.85297	-0.00378	-0.34371	0.84961	-0.00762	-0.69247	0.84961	-0.01735	-1.57693	0.87791	-0.0318	-2.89085
0.84946	-0.00207	-0.18827	0.85276	-0.00371	-0.3373	0.84946	-0.00769	-0.69913	0.84946	-0.01753	-1.59357	0.87777	-0.03181	-2.89168
0.8493	-0.00183	-0.16604	0.85284	-0.00397	-0.36069	0.8493	-0.00738	-0.67055	0.8493	-0.01761	-1.60106	0.87772	-0.03192	-2.90222
0.84915	-0.0021	-0.19135	0.85278	-0.00408	-0.37107	0.84915	-0.00779	-0.70856	0.84915	-0.01744	-1.58553	0.87751	-0.03187	-2.89695
0.849	-0.0018	-0.16332	0.85242	-0.00385	-0.34981	0.849	-0.00749	-0.68082	0.849	-0.01732	-1.57443	0.8774	-0.03191	-2.90083
0.84885	-0.00213	-0.19365	0.85211	-0.00367	-0.3337	0.84885	-0.00747	-0.67915	0.84885	-0.01724	-1.56694	0.87709	-0.03174	-2.8853
0.84869	-0.00179	-0.16316	0.85215	-0.00388	-0.35264	0.84869	-0.00778	-0.70718	0.84869	-0.01726	-1.56916	0.87692	-0.03171	-2.88308
0.84854	-0.00212	-0.19295	0.85218	-0.00409	-0.37206	0.84854	-0.00734	-0.66723	0.84854	-0.01752	-1.59246	0.87671	-0.03165	-2.87725
0.84839	-0.00179	-0.16296	0.85186	-0.0039	-0.35489	0.84839	-0.00767	-0.69691	0.84839	-0.01761	-1.60106	0.87648	-0.03156	-2.86921
0.84824	-0.00212	-0.19293	0.85152	-0.00369	-0.33514	0.84824	-0.00763	-0.69386	0.84824	-0.0176	-1.59995	0.87634	-0.03158	-2.87059
0.84808	-0.00181	-0.16493	0.85149	-0.00383	-0.34798	0.84808	-0.00736	-0.66917	0.84808	-0.01738	-1.58026	0.87614	-0.03152	-2.86588
0.84793	-0.00209	-0.18971	0.85155	-0.00406	-0.36943	0.84793	-0.00779	-0.70773	0.84793	-0.01718	-1.56195	0.87606	-0.0316	-2.87281
0.84778	-0.00187	-0.17001	0.85131	-0.00397	-0.36111	0.84778	-0.00748	-0.67971	0.84778	-0.01722	-1.56555	0.87597	-0.03168	-2.88003
0.84763	-0.00204	-0.18571	0.85093	-0.00372	-0.33797	0.84763	-0.00754	-0.68526	0.84763	-0.01736	-1.57804	0.876	-0.03188	-2.89834
0.84747	-0.0019	-0.17273	0.85081	-0.00375	-0.34055	0.84747	-0.00776	-0.70579	0.84747	-0.01756	-1.59662	0.87586	-0.03189	-2.89945
0.84732	-0.00201	-0.18255	0.85092	-0.00404	-0.36763	0.84732	-0.00741	-0.67333	0.84732	-0.01761	-1.60134	0.87591	-0.03213	-2.92053
0.84717	-0.00196	-0.17792	0.85078	-0.00406	-0.36899	0.84717	-0.00771	-0.70052	0.84717	-0.01749	-1.58997	0.8756	-0.03195	-2.90444
0.84702	-0.00194	-0.1767	0.85036	-0.00376	-0.34152	0.84702	-0.00756	-0.68748	0.84702	-0.01738	-1.5797	0.87552	-0.03203	-2.91165
0.84686	-0.00202	-0.18322	0.85017	-0.00372	-0.33822	0.84686	-0.00744	-0.6761	0.84686	-0.01729	-1.57193	0.87522	-0.03186	-2.8964
0.84671	-0.00189	-0.17212	0.85027	-0.004	-0.36344	0.84671	-0.00778	-0.7069	0.84671	-0.01729	-1.57166	0.87504	-0.03184	-2.89418
0.84656	-0.00205	-0.18666	0.85018	-0.00407	-0.37037	0.84656	-0.00738	-0.67111	0.84656	-0.01756	-1.59607	0.8748	-0.03174	-2.8853
0.84641	-0.00186	-0.16923	0.84981	-0.00383	-0.34798	0.84641	-0.00765	-0.69552	0.84641	-0.01775	-1.61355	0.87461	-0.03169	-2.88086
0.84625	-0.0021	-0.19104	0.84954	-0.00369	-0.33544	0.84625	-0.0077	-0.69968	0.84625	-0.01767	-1.60606	0.87446	-0.0317	-2.88169
0.8461	-0.00182	-0.16549	0.84958	-0.00391	-0.35553	0.8461	-0.0074	-0.6725	0.8461	-0.01748	-1.58913	0.87421	-0.03159	-2.87143
0.84595	-0.00213	-0.1934	0.8496	-0.00411	-0.37323	0.84595	-0.00782	-0.71134	0.84595	-0.01729	-1.57193	0.87416	-0.0317	-2.88141
0.84579	-0.0018	-0.16399	0.84927	-0.00391	-0.35506	0.84579	-0.0075	-0.68221	0.84579	-0.01724	-1.56722	0.87408	-0.03178	-2.8889
0.84564	-0.00213	-0.1939	0.84892	-0.00368	-0.33467	0.84564	-0.00753	-0.68415	0.84564	-0.0174	-1.58192	0.87408	-0.03195	-2.905
0.84549	-0.00181	-0.16452	0.84893	-0.00386	-0.35112	0.84549	-0.00782	-0.7105	0.84549	-0.01756	-1.59662	0.87393	-0.03196	-2.90555
0.84534	-0.00214	-0.19426	0.84898	-0.0041	-0.37229	0.84534	-0.00739	-0.67139	0.84534	-0.01763	-1.60301	0.87404	-0.03225	-2.93218
0.84518	-0.00182	-0.16504	0.84871	-0.00397	-0.3605	0.84518	-0.00771	-0.70052	0.84518	-0.01757	-1.5969	0.87369	-0.03203	-2.91221
0.84503	-0.00211	-0.19196	0.84835	-0.00373	-0.33875	0.84503	-0.00766	-0.69636	0.84503	-0.01738	-1.57998	0.87359	-0.03209	-2.91748
0.84488	-0.00184	-0.16724	0.84826	-0.0038	-0.34543	0.84488	-0.00742	-0.67416	0.84488	-0.01731	-1.57387	0.87336	-0.032	-2.90916
0.84473	-0.00206	-0.1876	0.84835	-0.00407	-0.37043	0.84473	-0.00781	-0.70995	0.84473	-0.01731	-1.5736	0.87316	-0.03194	-2.90389
0.84457	-0.00189	-0.17143	0.84818	-0.00406	-0.36871	0.84457	-0.0075	-0.68137	0.84457	-0.01753	-1.59385	0.87288	-0.03181	-2.89168
0.84442	-0.00203	-0.18435	0.84776	-0.00375	-0.34063	0.84442	-0.00758	-0.68942	0.84442	-0.01779	-1.61743	0.87269	-0.03176	-2.88752
0.84427	-0.00193	-0.17509	0.84759	-0.00373	-0.33894	0.84427	-0.00778	-0.7069	0.84427	-0.01768	-1.60689	0.87255	-0.03178	-2.8889
0.84412	-0.00198	-0.17983	0.8477	-0.00403	-0.36596	0.84412	-0.00742	-0.67499	0.84412	-0.01754	-1.59468	0.87233	-0.0317	-2.88169
0.84396	-0.002	-0.18164	0.84759	-0.00407	-0.37015	0.84396	-0.00777	-0.70662	0.84396	-0.01735	-1.57748	0.87224	-0.03177	-2.8878
0.84381	-0.00193	-0.1755	0.8472	-0.00381	-0.34654	0.84381	-0.00757	-0.68859	0.84381	-0.01729	-1.57166	0.87219	-0.03188	-2.89862
0.84366	-0.00204	-0.18574	0.84697	-0.00372	-0.33833	0.84366	-0.00749	-0.6811	0.84366	-0.01746	-1.58719	0.87214	-0.032	-2.90916
0.84351	-0.00188	-0.17131	0.84703	-0.00396	-0.36044	0.84351	-0.00781	-0.70967	0.84351	-0.01758	-1.59773	0.87202	-0.03204	-2.91249
0.84335	-0.0021	-0.19049	0.84702	-0.00412	-0.37453	0.84335	-0.00738	-0.67111	0.84335	-0.01766	-1.6055	0.87209	-0.03229	-2.93551
0.8432	-0.00185	-0.16818	0.84668	-0.00391	-0.35522	0.8432	-0.00769	-0.69885	0.8432	-0.01765	-1.60439	0.8718	-0.03214	-2.92136
0.84305	-0.00212	-0.19309	0.84635	-0.00371	-0.33683	0.84305	-0.00771	-0.70107	0.84305	-0.0174	-1.58164	0.87167	-0.03216	-2.92386
0.8429	-0.00182	-0.1651	0.84636	-0.00389	-0.35406	0.8429	-0.00742	-0.67416	0.8429	-0.01726	-1.56916	0.87151	-0.03215	-2.92247
0.84274	-0.00215	-0.19501	0.84642	-0.00413	-0.37509	0.84274	-0.00785	-0.71383	0.84274	-0.01732	-1.57471	0.87127	-0.03205	-2.91387
0.84259	-0.00182	-0.16527	0.84611	-0.00395	-0.35914	0.84259	-0.00754	-0.68554	0.84259	-0.01754	-1.59413	0.87098	-0.03189	-2.89945
0.84244	-0.00215	-0.19512	0.84576	-0.00373	-0.33886	0.84244	-0.00757	-0.68803	0.84244	-0.01775	-1.61327	0.8708	-0.03187	-2.89723
0.84229	-0.00182	-0.16552	0.84571	-0.00385	-0.34962	0.84229	-0.00784	-0.71245	0.84229	-0.01776	-1.6141	0.87062	-0.03184	-2.89418
0.84213	-0.00208	-0.18935	0.84572	-0.00403	-0.36657	0.84213	-0.00735	-0.66833	0.84213	-0.01756	-1.59635	0.87041	-0.03177	-2.88863
0.84198	-0.0018	-0.16346	0.84553	-0.00399	-0.36233	0.84198	-0.00768	-0.69802	0.84198	-0.01739	-1.58053	0.87028	-0.03179	-2.89029
0.84183	-0.00207	-0.18829	0.84513	-0.00371	-0.3373	0.84183	-0.00762	-0.69303	0.84183	-0.01733	-1.57554	0.87026	-0.03195	-2.90444
0.84167	-0.00186	-0.16946	0.84499	-0.00372	-0.33844	0.84167	-0.0074	-0.6725	0.84167	-0.01744	-1.58553	0.87017	-0.03202	-2.91082
0.84152	-0.00203	-0.18449	0.84511	-0.00403	-0.36624	0.84152	-0.00777	-0.70607	0.84152	-0.01759	-1.59884	0.87008	-0.03208	-2.91665
0.84137	-0.0019	-0.17292	0.84498	-0.00406	-0.36907	0.84137	-0.00746	-0.6786	0.84137	-0.01767	-1.60633	0.87008	-0.03226	-2.93246
0.84122	-0.00201	-0.18227	0.84458	-0.00378	-0.34327	0.84122	-0.00761	-0.69192	0.84122	-0.01768	-1.60689	0.86987	-0.03219	-2.92664
0.84106	-0.00197	-0.17867	0.84438	-0.00372	-0.33863	0.84106	-0.00775	-0.7044	0.84106	-0.01744	-1.5858	0.86974	-0.03222	-2.92886
0.84091	-0.00195	-0.17709	0.84446	-0.00399	-0.3626	0.84091	-0.00742	-0.67416	0.84091	-0.01721	-1.56416	0.86957	-0.0322	-2.92747
0.84076	-0.00203	-0.18435	0.8444	-0.00409	-0.37226	0.84076	-0.00781	-0.70967	0.84076	-0.01735	-1.57693	0.86936	-0.03214	-2.92136
0.84061	-0.00191	-0.17334	0.84406	-0.00388	-0.35251	0.84061	-0.00756	-0.68692	0.84061	-0.0175	-1.59135	0.86901	-0.03192	-2.90167
0.84045	-0.00207	-0.18818	0.84375	-0.0037	-0.33647	0.84045	-0.00751	-0.68248	0.84045	-0.0177	-1.60939	0.86888	-0.03193	-2.90305
0.8403	-0.00187	-0.16993	0.84378	-0.00391	-0.35581	0.8403	-0.00782	-0.71078	0.8403	-0.01779	-1.61743	0.8686	-0.03179	-2.89029
0.84015	-0.00211	-0.19215	0.84382	-0.00413	-0.37528	0.84015	-0.00739	-0.67222	0.84015	-0.01763	-1.60245	0.86855	-0.03191	-2.90111
0.84	-0.00184	-0.16704	0.8435	-0.00393	-0.35742	0.84	-0.00771	-0.70079	0.84	-0.01749	-1.58997	0.86837	-0.03188	-2.89778
0.83984	-0.00214	-0.19462	0.84315	-0.00372	-0.33789	0.83984	-0.00772	-0.70163	0.83984	-0.01742	-1.58331	0.8684	-0.03208	-2.91637
0.83969	-0.00182	-0.16516	0.84313	-0.00386	-0.35126	0.83969	-0.00742	-0.67444	0.83969	-0.01745	-1.58608	0.86828	-0.03212	-2.9197
0.83954	-0.00215	-0.19562	0.84319	-0.0041	-0.37281	0.83954	-0.00785	-0.71383	0.83954	-0.01769	-1.60828	0.8682	-0.03221	-2.92775
0.83939	-0.00182	-0.16527	0.84295	-0.00401	-0.3641	0.83939	-0.00754	-0.68526	0.83939	-0.01778	-1.6166	0.86812	-0.03228	-2.93468
0.83923	-0.00215	-0.19515	0.84258	-0.00376	-0.34152	0.83923	-0.00759	-0.68997	0.83923	-0.01779	-1.61688	0.86797	-0.03229	-2.93579
0.83908	-0.00183	-0.16613	0.84245	-0.00379	-0.34429	0.83908	-0.00784	-0.713	0.83908	-0.01756	-1.59607	0.86791	-0.03239	-2.94439
0.83893	-0.00213	-0.19356	0.84257	-0.00409	-0.37182	0.83893	-0.00744	-0.6761	0.83893	-0.01733	-1.57582	0.86768	-0.03231	-2.9369
0.83878	-0.00186	-0.16929	0.84242	-0.00409	-0.37193	0.83878	-0.00775	-0.70412	0.83878	-0.01741	-1.58248	0.86747	-0.03224	-2.93135
0.83862	-0.00208	-0.18924	0.84199	-0.00379	-0.3444	0.83862	-0.00767	-0.69747	0.83862	-0.01754	-1.59496	0.86716	-0.03206	-2.91443
0.83847	-0.00191	-0.17381	0.84182	-0.00376	-0.34213	0.83847	-0.00748	-0.67999	0.83847	-0.01776	-1.61438	0.86702	-0.03208	-2.91609
0.83832	-0.00205	-0.18652	0.84191	-0.00403	-0.36671	0.83832	-0.00783	-0.71189	0.83832	-0.01781	-1.61937	0.86665	-0.03183	-2.8939
0.83817	-0.00195	-0.17706	0.84182	-0.00411	-0.37334	0.83817	-0.0075	-0.68165	0.83817	-0.01768	-1.60689	0.86668	-0.03203	-2.91221
0.83801	-0.002	-0.18205	0.84145	-0.00386	-0.35104	0.83801	-0.00769	-0.69941	0.83801	-0.01756	-1.59662	0.86649	-0.03199	-2.9086
0.83786	-0.00201	-0.18299	0.84119	-0.00374	-0.33963	0.83786	-0.00779	-0.70829	0.83786	-0.01747	-1.5883	0.86647	-0.03214	-2.9222
0.83771	-0.00195	-0.17714	0.84124	-0.00396	-0.36038	0.83771	-0.00747	-0.67915	0.83771	-0.01748	-1.58913	0.86637	-0.03221	-2.92775
0.83755	-0.00206	-0.18771	0.84124	-0.00414	-0.37667	0.83755	-0.00788	-0.71661	0.83755	-0.01775	-1.61327	0.86632	-0.03232	-2.93801
0.8374	-0.00191	-0.17337	0.84092	-0.00395	-0.35903	0.8374	-0.0076	-0.69081	0.8374	-0.01796	-1.63241	0.86623	-0.03239	-2.94411
0.83725	-0.00211	-0.19165	0.84056	-0.00372	-0.33863	0.83725	-0.00756	-0.6872	0.83725	-0.01786	-1.62381	0.86608	-0.0324	-2.94522
0.8371	-0.00187	-0.16996	0.84057	-0.00391	-0.35522	0.8371	-0.00787	-0.7155	0.8371	-0.01766	-1.60578	0.86604	-0.03252	-2.9566
0.83694	-0.00214	-0.19495	0.84062	-0.00413	-0.3755	0.83694	-0.00744	-0.6761	0.83694	-0.01747	-1.58858	0.86581	-0.03243	-2.94855
0.83679	-0.00184	-0.16765	0.84036	-0.00401	-0.36435	0.83679	-0.00777	-0.70607	0.83679	-0.01743	-1.58469	0.86559	-0.03236	-2.94162
0.83664	-0.00217	-0.19687	0.83999	-0.00377	-0.34249	0.83664	-0.00775	-0.7044	0.83664	-0.01759	-1.5994	0.86532	-0.03222	-2.92913
0.83649	-0.00183	-0.16665	0.83991	-0.00384	-0.34934	0.83649	-0.00747	-0.67915	0.83649	-0.01776	-1.61438	0.86518	-0.03224	-2.93052
0.83633	-0.00216	-0.1967	0.84	-0.00412	-0.37481	0.83633	-0.00789	-0.71772	0.83633	-0.01782	-1.61993	0.86477	-0.03195	-2.90416
0.83618	-0.00183	-0.16671	0.83982	-0.00409	-0.37215	0.83618	-0.00757	-0.68859	0.83618	-0.01776	-1.61493	0.8648	-0.03215	-2.92303
0.83603	-0.00216	-0.19628	0.83941	-0.0038	-0.34521	0.83603	-0.00764	-0.69469	0.83603	-0.01758	-1.59857	0.86464	-0.03215	-2.92247
0.83588	-0.00186	-0.16873	0.83925	-0.00379	-0.34424	0.83588	-0.00787	-0.71522	0.83588	-0.01753	-1.5933	0.86456	-0.03222	-2.92941
0.83572	-0.00213	-0.1934	0.83935	-0.00408	-0.37079	0.83572	-0.0075	-0.68193	0.83572	-0.01751	-1.59191	0.86447	-0.0323	-2.93662
0.83557	-0.00191	-0.17331	0.83924	-0.00412	-0.37456	0.83557	-0.00782	-0.7105	0.83557	-0.01776	-1.61438	0.86448	-0.03248	-2.95271
0.83542	-0.00209	-0.1896	0.83885	-0.00385	-0.35001	0.83542	-0.0077	-0.69996	0.83542	-0.01801	-1.63741	0.86436	-0.03252	-2.9566
0.83527	-0.00194	-0.17628	0.83863	-0.00378	-0.3433	0.83527	-0.00754	-0.68526	0.83527	-0.01788	-1.62575	0.86421	-0.03252	-2.9566
0.83511	-0.00205	-0.18613	0.83869	-0.00402	-0.36557	0.83511	-0.00788	-0.71661	0.83511	-0.01775	-1.61355	0.86413	-0.03261	-2.96437
0.83496	-0.00199	-0.18094	0.83867	-0.00416	-0.37853	0.83496	-0.00751	-0.68304	0.83496	-0.01756	-1.59662	0.86395	-0.03257	-2.96131
0.83481	-0.00203	-0.18466	0.83836	-0.00399	-0.36291	0.83481	-0.0078	-0.70939	0.83481	-0.01755	-1.59524	0.86374	-0.0325	-2.95493
0.83466	-0.00209	-0.18987	0.83804	-0.0038	-0.34585	0.83466	-0.00787	-0.7155	0.83466	-0.01772	-1.61105	0.86352	-0.03243	-2.948
0.8345	-0.00197	-0.17908	0.83805	-0.00399	-0.36241	0.8345	-0.00755	-0.68637	0.8345	-0.01783	-1.62076	0.86335	-0.03241	-2.94633
0.83435	-0.00212	-0.19279	0.83809	-0.0042	-0.38175	0.83435	-0.00798	-0.72521	0.83435	-0.01792	-1.62908	0.863	-0.03219	-2.92636
0.8342	-0.00192	-0.17473	0.83779	-0.00404	-0.3671	0.8342	-0.00767	-0.69719	0.8342	-0.01791	-1.62797	0.86297	-0.03233	-2.93884
0.83405	-0.00214	-0.1947	0.83743	-0.00381	-0.34596	0.83405	-0.00766	-0.69663	0.83405	-0.01765	-1.60467	0.86282	-0.03233	-2.9394
0.83389	-0.00188	-0.17123	0.83739	-0.00393	-0.35683	0.83389	-0.00797	-0.72493	0.83389	-0.01754	-1.59496	0.86269	-0.03236	-2.94162
0.83374	-0.00219	-0.19867	0.83746	-0.00417	-0.3795	0.83374	-0.00753	-0.68415	0.83374	-0.01758	-1.59857	0.86262	-0.03245	-2.95022
0.83359	-0.00186	-0.16904	0.83725	-0.00411	-0.37367	0.83359	-0.00786	-0.71411	0.83359	-0.01779	-1.61771	0.86266	-0.03267	-2.96964
0.83344	-0.00219	-0.19936	0.83684	-0.00383	-0.34804	0.83344	-0.0078	-0.70939	0.83344	-0.01801	-1.63685	0.86251	-0.03267	-2.97019
0.83328	-0.00186	-0.16868	0.8367	-0.00384	-0.34907	0.83328	-0.00755	-0.68637	0.83328	-0.01799	-1.63574	0.86244	-0.03276	-2.97796
0.83313	-0.00218	-0.19853	0.83682	-0.00414	-0.37642	0.83313	-0.00796	-0.72327	0.83313	-0.01789	-1.62603	0.86226	-0.03273	-2.97574
0.83298	-0.00186	-0.16865	0.83668	-0.00416	-0.37806	0.83298	-0.00765	-0.69525	0.83298	-0.01768	-1.60772	0.86214	-0.03276	-2.97852
0.83282	-0.00216	-0.19637	0.83627	-0.00388	-0.35234	0.83282	-0.00772	-0.7019	0.83282	-0.01764	-1.60384	0.86183	-0.0326	-2.96326
0.83267	-0.00188	-0.17131	0.83608	-0.00382	-0.34771	0.83267	-0.00793	-0.72132	0.83267	-0.01776	-1.6141	0.86164	-0.03255	-2.95882
0.83252	-0.00212	-0.19301	0.83616	-0.00409	-0.37157	0.83252	-0.00758	-0.68914	0.83252	-0.0179	-1.62742	0.86146	-0.03252	-2.95632
0.83237	-0.00194	-0.17611	0.83608	-0.00418	-0.37958	0.83237	-0.0079	-0.71855	0.83237	-0.01797	-1.63352	0.86118	-0.03237	-2.943
0.83221	-0.00208	-0.18896	0.83574	-0.00396	-0.35966	0.83221	-0.00773	-0.70246	0.83221	-0.01799	-1.63546	0.86108	-0.03243	-2.94855
0.83206	-0.00197	-0.17886	0.83543	-0.00378	-0.34407	0.83206	-0.00762	-0.69303	0.83206	-0.01774	-1.61244	0.86089	-0.03239	-2.94439
0.83191	-0.00203	-0.18474	0.83547	-0.004	-0.36396	0.83191	-0.00795	-0.72271	0.83191	-0.01751	-1.59163	0.86079	-0.03246	-2.95049
0.83176	-0.00203	-0.18449	0.8355	-0.0042	-0.38219	0.83176	-0.00754	-0.68581	0.83176	-0.01763	-1.60273	0.8607	-0.03252	-2.9566
0.8316	-0.00198	-0.17967	0.83517	-0.00401	-0.3643	0.8316	-0.00783	-0.71217	0.8316	-0.01781	-1.61937	0.86074	-0.03274	-2.97657
0.83145	-0.00209	-0.1896	0.83483	-0.00379	-0.3446	0.83145	-0.00785	-0.71383	0.83145	-0.01801	-1.63713	0.86059	-0.03275	-2.97685
0.8313	-0.00193	-0.17578	0.83481	-0.00395	-0.35903	0.8313	-0.00756	-0.68748	0.8313	-0.01809	-1.64434	0.86062	-0.03295	-2.99516
0.83115	-0.00212	-0.19312	0.83487	-0.00418	-0.37989	0.83115	-0.00799	-0.7266	0.83115	-0.01792	-1.62936	0.86035	-0.03282	-2.98323
0.83099	-0.0019	-0.17254	0.83462	-0.00408	-0.37076	0.83099	-0.00768	-0.69858	0.83099	-0.01778	-1.6166	0.86025	-0.03287	-2.9885
0.83084	-0.00216	-0.19631	0.83424	-0.00382	-0.34757	0.83084	-0.0077	-0.69968	0.83084	-0.0177	-1.60911	0.85994	-0.0327	-2.97269
0.83069	-0.00186	-0.16929	0.83413	-0.00387	-0.35187	0.83069	-0.00798	-0.72521	0.83069	-0.01776	-1.61493	0.85976	-0.03266	-2.96908
0.83054	-0.00218	-0.19834	0.83424	-0.00416	-0.37792	0.83054	-0.00756	-0.6872	0.83054	-0.01798	-1.63491	0.85955	-0.0326	-2.96381
0.83038	-0.00185	-0.16857	0.83409	-0.00416	-0.37861	0.83038	-0.00788	-0.71633	0.83038	-0.01807	-1.6424	0.85934	-0.03253	-2.95743
0.83023	-0.00219	-0.199	0.83367	-0.00386	-0.35123	0.83023	-0.00782	-0.71134	0.83023	-0.01807	-1.6424	0.85918	-0.03253	-2.95715
0.83008	-0.00187	-0.16957	0.8335	-0.00384	-0.34954	0.83008	-0.00759	-0.69025	0.83008	-0.01786	-1.62354	0.85894	-0.03242	-2.94772
0.82993	-0.00218	-0.1982	0.83358	-0.00411	-0.3737	0.82993	-0.00797	-0.7241	0.82993	-0.01762	-1.60162	0.85889	-0.03254	-2.95854
0.82977	-0.00187	-0.17009	0.83349	-0.00418	-0.37994	0.82977	-0.00766	-0.69663	0.82977	-0.01771	-1.60994	0.8588	-0.03262	-2.96548
0.82962	-0.00215	-0.19556	0.83311	-0.00393	-0.35686	0.82962	-0.00777	-0.70634	0.82962	-0.01783	-1.62076	0.85882	-0.03281	-2.98295
0.82947	-0.00191	-0.17387	0.83286	-0.00381	-0.34646	0.82947	-0.00793	-0.72105	0.82947	-0.01806	-1.64157	0.85866	-0.0328	-2.98184
0.82932	-0.00211	-0.19176	0.8329	-0.00403	-0.36621	0.82932	-0.0076	-0.69108	0.82932	-0.01811	-1.64656	0.85876	-0.03308	-3.00737
0.82916	-0.00195	-0.17684	0.83291	-0.00421	-0.38227	0.82916	-0.00796	-0.72382	0.82916	-0.01795	-1.63214	0.85842	-0.03287	-2.9885
0.82901	-0.00207	-0.18779	0.83257	-0.004	-0.36396	0.82901	-0.00773	-0.70301	0.82901	-0.01784	-1.62159	0.85833	-0.03294	-2.99461
0.82886	-0.00201	-0.18263	0.83224	-0.0038	-0.34507	0.82886	-0.00768	-0.69774	0.82886	-0.01777	-1.61549	0.85807	-0.03283	-2.98434
0.8287	-0.00201	-0.18274	0.83225	-0.00398	-0.36186	0.8287	-0.00798	-0.72576	0.8287	-0.01777	-1.61521	0.85787	-0.03277	-2.97935
0.82855	-0.00206	-0.18771	0.83229	-0.0042	-0.38222	0.82855	-0.00756	-0.6872	0.82855	-0.01804	-1.63963	0.85761	-0.03265	-2.96825
0.8284	-0.00196	-0.17825	0.83202	-0.00407	-0.37004	0.8284	-0.00786	-0.71494	0.8284	-0.01821	-1.65544	0.85742	-0.0326	-2.96409
0.82825	-0.00211	-0.19157	0.83166	-0.00384	-0.3489	0.82825	-0.00788	-0.71661	0.82825	-0.01814	-1.64878	0.85728	-0.03262	-2.9652
0.82809	-0.00193	-0.17503	0.83157	-0.00391	-0.35536	0.82809	-0.00758	-0.68914	0.82809	-0.01794	-1.63047	0.85704	-0.03252	-2.95632
0.82794	-0.00215	-0.19556	0.83166	-0.00418	-0.37978	0.82794	-0.00801	-0.72854	0.82794	-0.01775	-1.61355	0.85698	-0.03263	-2.96659
0.82779	-0.00189	-0.17217	0.83149	-0.00416	-0.37839	0.82779	-0.0077	-0.70024	0.82779	-0.01771	-1.61022	0.85692	-0.03273	-2.97546
0.82764	-0.00219	-0.1992	0.83108	-0.00387	-0.35156	0.82764	-0.00774	-0.70385	0.82764	-0.01786	-1.62381	0.85686	-0.03284	-2.98545
0.82748	-0.00186	-0.16946	0.83091	-0.00385	-0.34973	0.82748	-0.008	-0.72715	0.82748	-0.01804	-1.64018	0.85674	-0.03287	-2.98795
0.82733	-0.0022	-0.20033	0.83102	-0.00414	-0.37659	0.82733	-0.00759	-0.68997	0.82733	-0.01809	-1.6449	0.85684	-0.03315	-3.01375
0.82718	-0.00187	-0.16982	0.8309	-0.00418	-0.37983	0.82718	-0.0079	-0.71855	0.82718	-0.01802	-1.63852	0.85652	-0.03297	-2.99738
0.82703	-0.0022	-0.19981	0.83051	-0.00391	-0.35575	0.82703	-0.00784	-0.713	0.82703	-0.01785	-1.62298	0.85638	-0.03298	-2.99849
0.82687	-0.00188	-0.17073	0.83029	-0.00384	-0.34876	0.82687	-0.00763	-0.6933	0.82687	-0.0178	-1.61854	0.85621	-0.03297	-2.99683
0.82672	-0.00219	-0.19889	0.83035	-0.00408	-0.37046	0.82672	-0.008	-0.72687	0.82672	-0.01779	-1.61743	0.856	-0.03289	-2.99045
0.82657	-0.0019	-0.17284	0.83032	-0.00421	-0.38308	0.82657	-0.00767	-0.69719	0.82657	-0.01803	-1.63935	0.85568	-0.03271	-2.97408
0.82642	-0.00214	-0.19467	0.82998	-0.004	-0.36402	0.82642	-0.00783	-0.71217	0.82642	-0.01829	-1.66265	0.8555	-0.03268	-2.97047
0.82626	-0.00195	-0.17689	0.82966	-0.00382	-0.34721	0.82626	-0.00795	-0.72271	0.82626	-0.01815	-1.65017	0.85536	-0.03269	-2.97158
0.82611	-0.00211	-0.19187	0.82968	-0.00401	-0.36493	0.82611	-0.00763	-0.6933	0.82611	-0.01801	-1.63685	0.85517	-0.03265	-2.96797
0.82596	-0.00199	-0.18089	0.82972	-0.00422	-0.38386	0.82596	-0.00803	-0.7302	0.82596	-0.01782	-1.61965	0.85504	-0.03268	-2.97102
0.82581	-0.00207	-0.18799	0.82942	-0.00406	-0.36885	0.82581	-0.00774	-0.70385	0.82581	-0.01774	-1.61299	0.85504	-0.03285	-2.98601
0.82565	-0.00205	-0.18616	0.82906	-0.00383	-0.34823	0.82565	-0.00771	-0.70107	0.82565	-0.01792	-1.62936	0.85495	-0.03292	-2.99266
0.8255	-0.002	-0.18194	0.82902	-0.00396	-0.35969	0.8255	-0.00802	-0.72909	0.8255	-0.01805	-1.64074	0.85482	-0.03295	-2.99516
0.82535	-0.0021	-0.19126	0.82908	-0.0042	-0.3815	0.82535	-0.0076	-0.69081	0.82535	-0.01815	-1.64961	0.85486	-0.03316	-3.0143
0.8252	-0.00196	-0.17856	0.82887	-0.00413	-0.37567	0.8252	-0.00791	-0.71883	0.8252	-0.01812	-1.64739	0.85463	-0.03307	-3.00626
0.82504	-0.00214	-0.19498	0.82848	-0.00386	-0.35079	0.82504	-0.00789	-0.71716	0.82504	-0.01786	-1.62381	0.85448	-0.03308	-3.00737
0.82489	-0.00192	-0.17495	0.82834	-0.00388	-0.35248	0.82489	-0.0076	-0.69136	0.82489	-0.01775	-1.61383	0.85432	-0.03306	-3.0057
0.82474	-0.00218	-0.19823	0.82845	-0.00417	-0.37881	0.82474	-0.00804	-0.73131	0.82474	-0.01779	-1.61688	0.85411	-0.033	-3.00043
0.82458	-0.00189	-0.1714	0.82831	-0.00419	-0.38067	0.82458	-0.00772	-0.70218	0.82458	-0.01802	-1.63796	0.85377	-0.03279	-2.98101
0.82443	-0.00221	-0.20056	0.82791	-0.00391	-0.35503	0.82443	-0.00778	-0.70718	0.82443	-0.01821	-1.65544	0.85362	-0.0328	-2.98157
0.82428	-0.00187	-0.1702	0.82772	-0.00386	-0.35112	0.82428	-0.00802	-0.72882	0.82428	-0.01822	-1.65599	0.85337	-0.03269	-2.97158
0.82413	-0.00221	-0.2005	0.82779	-0.00412	-0.37434	0.82413	-0.00764	-0.69414	0.82413	-0.01808	-1.64379	0.8533	-0.03278	-2.97963
0.82397	-0.00188	-0.17059	0.82773	-0.00422	-0.3833	0.82397	-0.00794	-0.72216	0.82397	-0.01788	-1.6252	0.85312	-0.03275	-2.97741
0.82382	-0.00221	-0.20053	0.82737	-0.00398	-0.36222	0.82382	-0.00785	-0.71383	0.82382	-0.01785	-1.62243	0.85313	-0.03293	-2.9935
0.82367	-0.0019	-0.17234	0.82707	-0.00382	-0.34751	0.82367	-0.00767	-0.69691	0.82367	-0.01797	-1.63325	0.85302	-0.03298	-2.99849
0.82352	-0.00218	-0.19811	0.82711	-0.00404	-0.36704	0.82352	-0.00802	-0.72937	0.82352	-0.0181	-1.64573	0.85294	-0.03306	-3.00515
0.82336	-0.00194	-0.17595	0.82714	-0.00424	-0.3858	0.82336	-0.00766	-0.69663	0.82336	-0.01819	-1.65322	0.85289	-0.03317	-3.01569
0.82321	-0.00213	-0.19404	0.82682	-0.00405	-0.36826	0.82321	-0.00789	-0.71689	0.82321	-0.01819	-1.6535	0.85272	-0.03315	-3.01403
0.82306	-0.00198	-0.18014	0.82647	-0.00383	-0.34859	0.82306	-0.00797	-0.7241	0.82306	-0.01794	-1.63075	0.85264	-0.03324	-3.02152
0.82291	-0.0021	-0.19115	0.82646	-0.004	-0.36324	0.82291	-0.00765	-0.69525	0.82291	-0.01772	-1.61105	0.85242	-0.03316	-3.01458
0.82275	-0.00202	-0.18391	0.82652	-0.00423	-0.38419	0.82275	-0.00808	-0.73436	0.82275	-0.01785	-1.6227	0.85222	-0.03311	-3.00959
0.8226	-0.00201	-0.18311	0.82624	-0.00409	-0.37184	0.8226	-0.00775	-0.70496	0.8226	-0.018	-1.6363	0.85186	-0.03288	-2.98878
0.82245	-0.00207	-0.18813	0.82587	-0.00385	-0.34987	0.82245	-0.00774	-0.70329	0.82245	-0.01819	-1.65322	0.85173	-0.0329	-2.99072
0.8223	-0.00198	-0.17975	0.82577	-0.0039	-0.35467	0.8223	-0.00803	-0.72992	0.8223	-0.01826	-1.66043	0.85138	-0.03268	-2.97047
0.82214	-0.00212	-0.19243	0.82587	-0.00418	-0.38039	0.82214	-0.0076	-0.69136	0.82214	-0.0181	-1.64573	0.85139	-0.03286	-2.98712
0.82199	-0.00193	-0.17573	0.82571	-0.00418	-0.38025	0.82199	-0.00792	-0.72021	0.82199	-0.01796	-1.63241	0.85119	-0.0328	-2.98212
0.82184	-0.00216	-0.19612	0.8253	-0.00389	-0.35373	0.82184	-0.0079	-0.718	0.82184	-0.0179	-1.62742	0.85119	-0.03298	-2.99849
0.82169	-0.00191	-0.17381	0.82512	-0.00386	-0.35129	0.82169	-0.00763	-0.69358	0.82169	-0.01795	-1.63214	0.85109	-0.03304	-3.00348
0.82153	-0.0022	-0.20003	0.82522	-0.00414	-0.37639	0.82153	-0.00805	-0.73214	0.82153	-0.01818	-1.65239	0.85104	-0.03315	-3.01347
0.82138	-0.00187	-0.1704	0.82512	-0.0042	-0.38214	0.82138	-0.00773	-0.70301	0.82138	-0.01825	-1.65932	0.85094	-0.03321	-3.01902
0.82123	-0.00221	-0.20114	0.82475	-0.00395	-0.3595	0.82123	-0.00781	-0.71023	0.82123	-0.01826	-1.66016	0.85079	-0.03322	-3.01958
0.82108	-0.00189	-0.17145	0.82449	-0.00383	-0.34851	0.82108	-0.00802	-0.72909	0.82108	-0.01803	-1.63879	0.85076	-0.03335	-3.03178
0.82092	-0.00222	-0.20147	0.82454	-0.00407	-0.36996	0.82092	-0.00767	-0.69719	0.82092	-0.0178	-1.61799	0.85051	-0.03325	-3.02235
0.82077	-0.00189	-0.17204	0.82455	-0.00424	-0.38585	0.82077	-0.00799	-0.72604	0.82077	-0.01791	-1.62797	0.8503	-0.03318	-3.01597
0.82062	-0.00221	-0.20078	0.82421	-0.00404	-0.36707	0.82062	-0.00785	-0.71328	0.82062	-0.01803	-1.63879	0.85001	-0.03303	-3.00265
0.82047	-0.00192	-0.17417	0.82388	-0.00384	-0.34876	0.82047	-0.00771	-0.70052	0.82047	-0.01824	-1.65849	0.84987	-0.03304	-3.00404
0.82031	-0.00216	-0.19656	0.82389	-0.00402	-0.36577	0.82031	-0.00804	-0.73131	0.82031	-0.01831	-1.66432	0.84947	-0.03276	-2.97796
0.82016	-0.00194	-0.1767	0.82391	-0.00421	-0.3828	0.82016	-0.00762	-0.69303	0.82016	-0.01812	-1.64739	0.84949	-0.03295	-2.99572
0.82001	-0.0021	-0.19118	0.82363	-0.00408	-0.37046	0.82001	-0.00789	-0.71772	0.82001	-0.01801	-1.63713	0.84931	-0.03292	-2.99266
0.81985	-0.00198	-0.17991	0.82328	-0.00384	-0.3494	0.81985	-0.00794	-0.72188	0.81985	-0.01793	-1.62964	0.84924	-0.03301	-3.00127
0.8197	-0.00207	-0.18804	0.8232	-0.00393	-0.35742	0.8197	-0.00764	-0.69414	0.8197	-0.01794	-1.63075	0.84915	-0.03309	-3.0082
0.81955	-0.00205	-0.18674	0.82329	-0.0042	-0.38172	0.81955	-0.00806	-0.73298	0.81955	-0.01821	-1.65516	0.84914	-0.03324	-3.02207
0.8194	-0.00201	-0.1825	0.82311	-0.00418	-0.37969	0.8194	-0.00777	-0.70607	0.8194	-0.01836	-1.66876	0.84903	-0.0333	-3.02734
0.81924	-0.0021	-0.19121	0.8227	-0.00388	-0.35306	0.81924	-0.00777	-0.70634	0.81924	-0.01831	-1.6646	0.84888	-0.03329	-3.02679
0.81909	-0.00196	-0.17858	0.82254	-0.00388	-0.35262	0.81909	-0.00807	-0.73353	0.81909	-0.01809	-1.6449	0.84881	-0.03339	-3.03567
0.81894	-0.00215	-0.19565	0.82265	-0.00417	-0.3795	0.81894	-0.00763	-0.69386	0.81894	-0.01792	-1.62908	0.84861	-0.03334	-3.03095
0.81879	-0.00192	-0.17492	0.82253	-0.00421	-0.38252	0.81879	-0.00796	-0.72354	0.81879	-0.01789	-1.62603	0.84836	-0.03323	-3.02096
0.81863	-0.00219	-0.19911	0.82215	-0.00395	-0.35864	0.81863	-0.00791	-0.71883	0.81863	-0.01804	-1.63963	0.84814	-0.03315	-3.01375
0.81848	-0.0019	-0.17276	0.82192	-0.00387	-0.35167	0.81848	-0.00767	-0.69719	0.81848	-0.01822	-1.65627	0.84798	-0.03314	-3.01264
0.81833	-0.00221	-0.20114	0.82198	-0.00411	-0.37329	0.81833	-0.00806	-0.7327	0.81833	-0.01828	-1.66182	0.8476	-0.03289	-2.98989
0.81818	-0.00188	-0.17112	0.82196	-0.00425	-0.38619	0.81818	-0.00776	-0.70579	0.81818	-0.0182	-1.65461	0.84759	-0.03304	-3.00404
0.81802	-0.00221	-0.20092	0.82162	-0.00404	-0.36693	0.81802	-0.00785	-0.71328	0.81802	-0.01804	-1.6399	0.84744	-0.03306	-3.00515
0.81787	-0.00189	-0.17181	0.8213	-0.00385	-0.34993	0.81787	-0.00804	-0.73131	0.81787	-0.01798	-1.63463	0.84732	-0.03308	-3.00765
0.81772	-0.00221	-0.20075	0.82133	-0.00405	-0.36846	0.81772	-0.00768	-0.69858	0.81772	-0.01796	-1.63269	0.84725	-0.03318	-3.0168
0.81757	-0.0019	-0.17267	0.82136	-0.00427	-0.38791	0.81757	-0.00804	-0.73103	0.81757	-0.01821	-1.65544	0.84727	-0.03338	-3.03456
0.81741	-0.00219	-0.19939	0.82106	-0.00409	-0.37201	0.81741	-0.00784	-0.71245	0.81741	-0.01846	-1.67819	0.84716	-0.03342	-3.03816
0.81726	-0.00195	-0.17703	0.8207	-0.00387	-0.35151	0.81726	-0.00776	-0.70523	0.81726	-0.01833	-1.66654	0.84705	-0.03347	-3.04288
0.81711	-0.00215	-0.19517	0.82066	-0.00399	-0.36238	0.81711	-0.00807	-0.73381	0.81711	-0.01819	-1.6535	0.8469	-0.03347	-3.04288
0.81696	-0.00199	-0.18119	0.82072	-0.00423	-0.38458	0.81696	-0.00766	-0.69663	0.81696	-0.018	-1.6363	0.84676	-0.03349	-3.04454
0.8168	-0.00212	-0.19248	0.82051	-0.00417	-0.37911	0.8168	-0.00796	-0.72354	0.8168	-0.01792	-1.62936	0.84647	-0.03333	-3.02984
0.81665	-0.00204	-0.18524	0.82013	-0.00391	-0.35534	0.81665	-0.00798	-0.72576	0.81665	-0.0181	-1.64573	0.84627	-0.03329	-3.02596
0.8165	-0.00205	-0.18655	0.81998	-0.00391	-0.3557	0.8165	-0.00768	-0.69802	0.8165	-0.01823	-1.65683	0.84609	-0.03325	-3.02235
0.81635	-0.0021	-0.19115	0.82009	-0.00421	-0.38294	0.81635	-0.00812	-0.73825	0.81635	-0.01832	-1.66515	0.84579	-0.03308	-3.00765
0.81619	-0.00201	-0.18233	0.81996	-0.00423	-0.38441	0.81619	-0.00781	-0.70967	0.81619	-0.01829	-1.66238	0.84571	-0.03316	-3.01486
0.81604	-0.00215	-0.1952	0.81956	-0.00395	-0.35939	0.81604	-0.00783	-0.71217	0.81604	-0.01805	-1.64129	0.84555	-0.03316	-3.01458
0.81589	-0.00196	-0.17839	0.81936	-0.00391	-0.35511	0.81589	-0.00811	-0.73769	0.81589	-0.01794	-1.6313	0.84541	-0.03317	-3.01514
0.81573	-0.00219	-0.19897	0.81944	-0.00416	-0.37814	0.81573	-0.00769	-0.69941	0.81573	-0.01798	-1.63436	0.84535	-0.03327	-3.02457
0.81558	-0.00192	-0.17478	0.81937	-0.00426	-0.38696	0.81558	-0.00801	-0.72826	0.81558	-0.0182	-1.65433	0.84539	-0.03349	-3.04482
0.81543	-0.00223	-0.20236	0.81902	-0.00403	-0.36663	0.81543	-0.00796	-0.72354	0.81543	-0.01843	-1.67542	0.84524	-0.0335	-3.0451
0.81528	-0.0019	-0.17298	0.81872	-0.00386	-0.35134	0.81528	-0.00773	-0.70274	0.81528	-0.01839	-1.67181	0.84522	-0.03365	-3.05897
0.81512	-0.00223	-0.20286	0.81875	-0.00408	-0.37076	0.81512	-0.00809	-0.73575	0.81512	-0.01826	-1.6596	0.84499	-0.03356	-3.05065
0.81497	-0.0019	-0.17292	0.81878	-0.00428	-0.38893	0.81497	-0.00779	-0.70773	0.81497	-0.01806	-1.64212	0.84489	-0.03362	-3.05592
0.81482	-0.00223	-0.2028	0.81847	-0.0041	-0.37243	0.81482	-0.00792	-0.71994	0.81482	-0.01803	-1.63879	0.84456	-0.03342	-3.03816
0.81467	-0.00191	-0.17362	0.81812	-0.00387	-0.35223	0.81467	-0.00807	-0.73409	0.81467	-0.01815	-1.65017	0.84439	-0.03339	-3.03567
0.81451	-0.00222	-0.20183	0.8181	-0.00403	-0.36635	0.81451	-0.00773	-0.70246	0.81451	-0.01828	-1.66154	0.84419	-0.03334	-3.03095
0.81436	-0.00194	-0.17614	0.81816	-0.00426	-0.38749	0.81436	-0.00812	-0.73797	0.81436	-0.01837	-1.67014	0.84396	-0.03326	-3.02346
0.81421	-0.00218	-0.1985	0.81791	-0.00416	-0.37831	0.81421	-0.00786	-0.71467	0.81421	-0.01838	-1.6707	0.84381	-0.03326	-3.02374
0.81406	-0.00199	-0.18083	0.81754	-0.00391	-0.35547	0.81406	-0.00781	-0.71023	0.81406	-0.01812	-1.64739	0.84358	-0.03317	-3.01541
0.8139	-0.00214	-0.19495	0.81742	-0.00395	-0.35941	0.8139	-0.00812	-0.73797	0.8139	-0.01791	-1.62853	0.84353	-0.03328	-3.02568
0.81375	-0.00202	-0.18385	0.81753	-0.00425	-0.38594	0.81375	-0.0077	-0.69968	0.81375	-0.01803	-1.63879	0.84344	-0.03336	-3.03261
0.8136	-0.00209	-0.1904	0.81738	-0.00424	-0.38577	0.8136	-0.00801	-0.72826	0.8136	-0.01823	-1.65683	0.84345	-0.03354	-3.04926
0.81345	-0.00209	-0.1899	0.81696	-0.00395	-0.35872	0.81345	-0.00801	-0.72826	0.81345	-0.0184	-1.67264	0.84331	-0.03355	-3.05009
0.81329	-0.00203	-0.18488	0.81678	-0.00392	-0.35656	0.81329	-0.00773	-0.70301	0.81329	-0.01848	-1.68041	0.84339	-0.03382	-3.07423
0.81314	-0.00214	-0.19454	0.81688	-0.0042	-0.38161	0.81314	-0.00817	-0.74241	0.81314	-0.01832	-1.66543	0.84306	-0.03362	-3.05592
0.81299	-0.00199	-0.18125	0.81678	-0.00427	-0.3878	0.81299	-0.00784	-0.71245	0.81299	-0.01819	-1.6535	0.84297	-0.03368	-3.06202
0.81284	-0.00223	-0.20286	0.81646	-0.00407	-0.36979	0.81284	-0.00795	-0.72271	0.81284	-0.01816	-1.65072	0.84275	-0.03361	-3.05536
0.81268	-0.00199	-0.18105	0.8162	-0.00395	-0.35883	0.81268	-0.00819	-0.74491	0.81268	-0.01823	-1.65766	0.84256	-0.03357	-3.05204
0.81253	-0.00225	-0.20427	0.81624	-0.00417	-0.37903	0.81253	-0.0078	-0.70884	0.81253	-0.01845	-1.67736	0.84231	-0.03347	-3.04233
0.81238	-0.00195	-0.17745	0.81624	-0.00434	-0.39468	0.81238	-0.0081	-0.73658	0.81238	-0.01852	-1.68318	0.84211	-0.03341	-3.03705
0.81223	-0.00227	-0.20624	0.8159	-0.00413	-0.37534	0.81223	-0.00801	-0.72854	0.81223	-0.01852	-1.68374	0.84197	-0.03342	-3.03844
0.81207	-0.00193	-0.17578	0.81556	-0.00392	-0.35592	0.81207	-0.00783	-0.71161	0.81207	-0.0183	-1.66376	0.84172	-0.03331	-3.02818
0.81192	-0.00226	-0.20513	0.81557	-0.0041	-0.37301	0.81192	-0.00816	-0.74213	0.81192	-0.01805	-1.64101	0.84166	-0.03342	-3.03789
0.81177	-0.00193	-0.17575	0.81561	-0.00432	-0.39282	0.81177	-0.00785	-0.71356	0.81177	-0.01818	-1.65267	0.84159	-0.03351	-3.04621
0.81161	-0.00226	-0.20516	0.81534	-0.00418	-0.3803	0.81161	-0.00802	-0.72882	0.81161	-0.01829	-1.66293	0.84157	-0.03365	-3.05925
0.81146	-0.00195	-0.1772	0.81497	-0.00394	-0.35847	0.81146	-0.00812	-0.73825	0.81146	-0.01852	-1.68318	0.84143	-0.03367	-3.06091
0.81131	-0.00223	-0.20228	0.8149	-0.00404	-0.36685	0.81131	-0.0078	-0.70912	0.81131	-0.01858	-1.68901	0.84153	-0.03395	-3.08644
0.81116	-0.002	-0.18139	0.81498	-0.00429	-0.39043	0.81116	-0.00821	-0.74657	0.81116	-0.01842	-1.67458	0.84121	-0.03376	-3.06924
0.811	-0.00217	-0.19773	0.8148	-0.00427	-0.38791	0.811	-0.00793	-0.72105	0.811	-0.01831	-1.6646	0.84109	-0.0338	-3.07312
0.81085	-0.00202	-0.18338	0.81439	-0.00397	-0.361	0.81085	-0.00789	-0.71744	0.81085	-0.01822	-1.65627	0.84088	-0.03374	-3.06729
0.8107	-0.00214	-0.19429	0.81423	-0.00396	-0.3603	0.8107	-0.0082	-0.74518	0.8107	-0.01823	-1.65683	0.84066	-0.03367	-3.06064
0.81055	-0.00207	-0.18832	0.81434	-0.00426	-0.38724	0.81055	-0.00777	-0.70634	0.81055	-0.0185	-1.68152	0.84037	-0.03351	-3.04621
0.81039	-0.00207	-0.18843	0.81421	-0.00429	-0.38993	0.81039	-0.00807	-0.73353	0.81039	-0.01865	-1.69567	0.84017	-0.03346	-3.04149
0.81024	-0.00213	-0.19343	0.81382	-0.00402	-0.3651	0.81024	-0.00806	-0.73298	0.81024	-0.01859	-1.6904	0.84005	-0.03349	-3.04427
0.81009	-0.00202	-0.18366	0.8136	-0.00394	-0.35825	0.81009	-0.00778	-0.70718	0.81009	-0.01838	-1.67098	0.83984	-0.03343	-3.039
0.80994	-0.00217	-0.19712	0.81366	-0.00418	-0.3803	0.80994	-0.00822	-0.74713	0.80994	-0.0182	-1.65461	0.83972	-0.03347	-3.04233
0.80978	-0.00198	-0.18011	0.81363	-0.00432	-0.39271	0.80978	-0.00789	-0.71772	0.80978	-0.01818	-1.65267	0.8397	-0.03362	-3.0562
0.80963	-0.00221	-0.201	0.81328	-0.0041	-0.37301	0.80963	-0.00795	-0.72299	0.80963	-0.01832	-1.66543	0.83962	-0.0337	-3.06369
0.80948	-0.00195	-0.17728	0.81296	-0.00391	-0.35578	0.80948	-0.00818	-0.7438	0.80948	-0.0185	-1.68207	0.83949	-0.03372	-3.06591
0.80933	-0.00225	-0.20419	0.81299	-0.00411	-0.37398	0.80933	-0.00782	-0.71078	0.80933	-0.01857	-1.6879	0.83955	-0.03396	-3.08727
0.80917	-0.00192	-0.17489	0.81303	-0.00433	-0.39376	0.80917	-0.00811	-0.73742	0.80917	-0.01848	-1.68041	0.8393	-0.03385	-3.07728
0.80902	-0.00226	-0.20513	0.81272	-0.00415	-0.37772	0.80902	-0.008	-0.72771	0.80902	-0.01833	-1.66598	0.83915	-0.03385	-3.07728
0.80887	-0.00193	-0.17525	0.81237	-0.00393	-0.35731	0.80887	-0.00784	-0.713	0.80887	-0.01825	-1.65932	0.83899	-0.03384	-3.07673
0.80872	-0.00226	-0.20516	0.81233	-0.00406	-0.36876	0.80872	-0.00819	-0.74435	0.80872	-0.01825	-1.65877	0.83877	-0.03377	-3.06979
0.80856	-0.00193	-0.17528	0.81239	-0.0043	-0.39079	0.80856	-0.00782	-0.71106	0.80856	-0.01849	-1.68069	0.83845	-0.03358	-3.05314
0.80841	-0.00224	-0.20336	0.81218	-0.00424	-0.38516	0.80841	-0.00807	-0.73353	0.80841	-0.01875	-1.70427	0.83829	-0.03358	-3.05231
0.80826	-0.00196	-0.17836	0.81178	-0.00396	-0.35997	0.80826	-0.00813	-0.7388	0.80826	-0.01862	-1.69234	0.83806	-0.03349	-3.04454
0.80811	-0.00219	-0.1995	0.81164	-0.00398	-0.36141	0.80811	-0.00782	-0.71106	0.80811	-0.01846	-1.67819	0.83796	-0.03354	-3.04926
0.80795	-0.00201	-0.18302	0.81176	-0.00428	-0.38885	0.80795	-0.00823	-0.74824	0.80795	-0.01826	-1.66043	0.83779	-0.03352	-3.0476
0.8078	-0.00216	-0.19645	0.81162	-0.00429	-0.39029	0.8078	-0.00793	-0.72132	0.8078	-0.01819	-1.65322	0.83781	-0.03372	-3.06507
0.80765	-0.00205	-0.18632	0.81121	-0.00401	-0.3641	0.80765	-0.00793	-0.72049	0.80765	-0.01837	-1.66987	0.83769	-0.03376	-3.06896
0.8075	-0.00212	-0.19234	0.81102	-0.00396	-0.36044	0.8075	-0.00822	-0.7474	0.8075	-0.0185	-1.68207	0.83759	-0.03381	-3.07367
0.80734	-0.00211	-0.19165	0.8111	-0.00423	-0.38413	0.80734	-0.00778	-0.70745	0.80734	-0.01859	-1.68956	0.83756	-0.03395	-3.08616
0.80719	-0.00206	-0.18732	0.81103	-0.00432	-0.39273	0.80719	-0.00811	-0.73769	0.80719	-0.01856	-1.68734	0.83739	-0.03394	-3.08505
0.80704	-0.00216	-0.19681	0.81067	-0.00408	-0.37118	0.80704	-0.00807	-0.73353	0.80704	-0.01833	-1.66598	0.83729	-0.03399	-3.09004
0.80688	-0.00202	-0.18366	0.81038	-0.00393	-0.35725	0.80688	-0.00782	-0.7105	0.80688	-0.01824	-1.65821	0.83709	-0.03394	-3.0856
0.80673	-0.0022	-0.20036	0.81041	-0.00414	-0.37614	0.80673	-0.00823	-0.74796	0.80673	-0.01825	-1.65877	0.83688	-0.03387	-3.07922
0.80658	-0.00198	-0.17969	0.81044	-0.00434	-0.39431	0.80658	-0.00792	-0.71966	0.80658	-0.01847	-1.67874	0.83655	-0.03367	-3.06119
0.80643	-0.00224	-0.20369	0.81012	-0.00415	-0.3775	0.80643	-0.00799	-0.72632	0.80643	-0.01869	-1.69872	0.83642	-0.03369	-3.06313
0.80627	-0.00194	-0.17645	0.80978	-0.00393	-0.35769	0.80627	-0.0082	-0.74546	0.80627	-0.01866	-1.69595	0.83609	-0.03351	-3.04593
0.80612	-0.00227	-0.20622	0.80976	-0.00409	-0.37212	0.80612	-0.00784	-0.713	0.80612	-0.01853	-1.68429	0.83608	-0.03366	-3.06008
0.80597	-0.00194	-0.17595	0.80982	-0.00432	-0.3929	0.80597	-0.00817	-0.74269	0.80597	-0.01833	-1.66654	0.83587	-0.0336	-3.05453
0.80582	-0.00226	-0.20541	0.80957	-0.00421	-0.38294	0.80582	-0.008	-0.72771	0.80582	-0.01829	-1.66265	0.83589	-0.03379	-3.07146
0.80566	-0.00194	-0.17617	0.8092	-0.00397	-0.36083	0.80566	-0.00789	-0.71744	0.80566	-0.01842	-1.67486	0.83579	-0.03385	-3.07728
0.80551	-0.00226	-0.20513	0.80908	-0.00401	-0.36452	0.80551	-0.00822	-0.74713	0.80551	-0.01855	-1.68596	0.83572	-0.03394	-3.08533
0.80536	-0.00195	-0.17728	0.80918	-0.0043	-0.39074	0.80536	-0.00781	-0.71023	0.80536	-0.01862	-1.69289	0.83562	-0.034	-3.09088
0.80521	-0.00223	-0.20275	0.80903	-0.00429	-0.39024	0.80521	-0.0081	-0.73603	0.80521	-0.01863	-1.69373	0.83548	-0.03402	-3.09254
0.80505	-0.002	-0.18188	0.80861	-0.00399	-0.36299	0.80505	-0.00814	-0.73991	0.80505	-0.01836	-1.66931	0.83544	-0.03414	-3.10392
0.8049	-0.00219	-0.19875	0.80844	-0.00397	-0.361	0.8049	-0.00783	-0.71217	0.8049	-0.01818	-1.65239	0.8352	-0.03404	-3.09476
0.80475	-0.00204	-0.18516	0.80853	-0.00425	-0.38649	0.80475	-0.00826	-0.75101	0.80475	-0.01829	-1.66293	0.83499	-0.03398	-3.08949
0.8046	-0.00215	-0.1954	0.80844	-0.00432	-0.39243	0.8046	-0.00795	-0.72299	0.8046	-0.01848	-1.68041	0.83468	-0.0338	-3.07312
0.80444	-0.00209	-0.1896	0.80805	-0.00406	-0.36882	0.80444	-0.00798	-0.72521	0.80444	-0.01867	-1.69733	0.83455	-0.03383	-3.07562
0.80429	-0.00208	-0.18929	0.8078	-0.00394	-0.35853	0.80429	-0.00826	-0.75101	0.80429	-0.01873	-1.70316	0.83415	-0.03354	-3.04954
0.80414	-0.00215	-0.19512	0.80785	-0.00417	-0.37942	0.80414	-0.00782	-0.71134	0.80414	-0.01859	-1.68956	0.83419	-0.03377	-3.06979
0.80399	-0.00204	-0.18538	0.80786	-0.00435	-0.39542	0.80399	-0.00815	-0.74074	0.80399	-0.01842	-1.67486	0.83401	-0.03373	-3.06674
0.80383	-0.0022	-0.19981	0.80752	-0.00414	-0.37678	0.80383	-0.00809	-0.73575	0.80383	-0.01836	-1.66903	0.83396	-0.03385	-3.07756
0.80368	-0.002	-0.18172	0.80718	-0.00393	-0.35731	0.80368	-0.00785	-0.71383	0.80368	-0.01843	-1.67514	0.83387	-0.03392	-3.08339
0.80353	-0.00224	-0.20322	0.8072	-0.00412	-0.37473	0.80353	-0.00823	-0.74851	0.80353	-0.01862	-1.69262	0.83384	-0.03406	-3.09642
0.80338	-0.00196	-0.17847	0.80724	-0.00434	-0.39481	0.80338	-0.00794	-0.7216	0.80338	-0.0187	-1.70038	0.83374	-0.03412	-3.10142
0.80322	-0.00227	-0.20633	0.80697	-0.00421	-0.38227	0.80322	-0.00804	-0.73131	0.80322	-0.01871	-1.70122	0.83357	-0.0341	-3.10031
0.80307	-0.00189	-0.17226	0.80656	-0.00392	-0.35597	0.80307	-0.00815	-0.74102	0.80307	-0.01843	-1.67569	0.83348	-0.03416	-3.10586
0.80292	-0.00224	-0.20327	0.80649	-0.00401	-0.36446	0.80292	-0.00782	-0.71078	0.80292	-0.0182	-1.65433	0.83325	-0.03408	-3.09837
0.80276	-0.00192	-0.17412	0.80657	-0.00427	-0.38857	0.80276	-0.00818	-0.7438	0.80276	-0.01831	-1.6646	0.83302	-0.034	-3.0906
0.80261	-0.00225	-0.2043	0.80639	-0.00425	-0.38635	0.80261	-0.00797	-0.72438	0.80261	-0.01845	-1.67736	0.83278	-0.0339	-3.08144
0.80246	-0.00192	-0.17498	0.80598	-0.00396	-0.35991	0.80246	-0.00789	-0.71689	0.80246	-0.01865	-1.69539	0.83261	-0.03387	-3.07922
0.80231	-0.00224	-0.20327	0.80582	-0.00395	-0.35914	0.80231	-0.00822	-0.74685	0.80231	-0.01873	-1.7026	0.83223	-0.03362	-3.0562
0.80215	-0.00197	-0.17903	0.80595	-0.00426	-0.38749	0.80215	-0.00779	-0.70856	0.80215	-0.01856	-1.68707	0.83225	-0.03381	-3.07367
0.802	-0.00219	-0.19953	0.80582	-0.00429	-0.39004	0.802	-0.0081	-0.73603	0.802	-0.01846	-1.67819	0.83209	-0.03381	-3.07367
0.80185	-0.00202	-0.18363	0.80543	-0.00402	-0.36588	0.80185	-0.00812	-0.73825	0.80185	-0.01837	-1.66959	0.83198	-0.03385	-3.07728
0.8017	-0.00216	-0.19631	0.80522	-0.00396	-0.35969	0.8017	-0.00782	-0.71078	0.8017	-0.01839	-1.67181	0.8319	-0.03394	-3.08533
0.80154	-0.00206	-0.18696	0.80528	-0.0042	-0.38208	0.80154	-0.00825	-0.75018	0.80154	-0.01866	-1.69595	0.83192	-0.03413	-3.10253
0.80139	-0.00212	-0.19248	0.80525	-0.00434	-0.39409	0.80139	-0.00794	-0.7216	0.80139	-0.0188	-1.70898	0.8318	-0.03417	-3.10641
0.80124	-0.00213	-0.1937	0.8049	-0.00411	-0.37392	0.80124	-0.00799	-0.72604	0.80124	-0.01875	-1.70482	0.83167	-0.03419	-3.10835
0.80109	-0.00207	-0.18791	0.80459	-0.00393	-0.35742	0.80109	-0.00825	-0.75018	0.80109	-0.01854	-1.68513	0.83156	-0.03424	-3.11279
0.80093	-0.00218	-0.19809	0.80462	-0.00414	-0.37617	0.80093	-0.00784	-0.713	0.80093	-0.01835	-1.66792	0.8314	-0.03423	-3.11224
0.80078	-0.00203	-0.18441	0.80466	-0.00435	-0.39581	0.80078	-0.00816	-0.74158	0.80078	-0.01834	-1.66737	0.83111	-0.03408	-3.09809
0.80063	-0.00222	-0.20175	0.80434	-0.00417	-0.37942	0.80063	-0.00808	-0.73464	0.80063	-0.01848	-1.67985	0.8309	-0.03402	-3.09254
0.80048	-0.00198	-0.17972	0.804	-0.00395	-0.35952	0.80048	-0.00787	-0.71522	0.80048	-0.01867	-1.69733	0.83073	-0.034	-3.0906
0.80032	-0.00226	-0.20516	0.80395	-0.00408	-0.3709	0.80032	-0.00823	-0.74796	0.80032	-0.01873	-1.70233	0.83041	-0.03381	-3.07367
0.80017	-0.00195	-0.1775	0.80402	-0.00433	-0.39357	0.80017	-0.00792	-0.71966	0.80017	-0.01863	-1.694	0.83034	-0.03389	-3.08117
0.80002	-0.00228	-0.20691	0.80381	-0.00426	-0.38705	0.80002	-0.00806	-0.73242	0.80002	-0.01849	-1.68124	0.83019	-0.0339	-3.08144
0.79987	-0.00194	-0.17672	0.80341	-0.00398	-0.36219	0.79987	-0.0082	-0.74574	0.79987	-0.01843	-1.67514	0.83005	-0.03392	-3.08366
0.79971	-0.00228	-0.20688	0.80327	-0.004	-0.36352	0.79971	-0.00787	-0.7155	0.79971	-0.01842	-1.67431	0.82999	-0.03401	-3.09226
0.79956	-0.00196	-0.17778	0.8034	-0.00431	-0.39185	0.79956	-0.00827	-0.75184	0.79956	-0.01867	-1.69705	0.83003	-0.03423	-3.11224
0.79941	-0.00227	-0.20663	0.80326	-0.00433	-0.39321	0.79941	-0.00799	-0.7266	0.79941	-0.01891	-1.71925	0.82987	-0.03423	-3.11141
0.79926	-0.00197	-0.17942	0.80284	-0.00403	-0.36607	0.79926	-0.00796	-0.72354	0.79926	-0.01879	-1.70787	0.82985	-0.03438	-3.12555
0.7991	-0.00224	-0.20336	0.80265	-0.00399	-0.36269	0.7991	-0.00827	-0.75212	0.7991	-0.01861	-1.69178	0.82964	-0.03431	-3.1189
0.79895	-0.00202	-0.18383	0.80274	-0.00426	-0.38724	0.79895	-0.00784	-0.71272	0.79895	-0.01844	-1.67597	0.82952	-0.03435	-3.12278
0.7988	-0.0022	-0.19956	0.80267	-0.00435	-0.39529	0.7988	-0.00815	-0.7413	0.7988	-0.01836	-1.66876	0.82921	-0.03417	-3.10641
0.79865	-0.00206	-0.1871	0.8023	-0.00411	-0.37367	0.79865	-0.00815	-0.74102	0.79865	-0.01854	-1.68513	0.82903	-0.03414	-3.10392
0.79849	-0.00216	-0.19678	0.80202	-0.00396	-0.35989	0.79849	-0.00786	-0.71494	0.79849	-0.01868	-1.69844	0.82883	-0.03409	-3.09864
0.79834	-0.00211	-0.19176	0.80206	-0.00418	-0.38033	0.79834	-0.00831	-0.75517	0.79834	-0.01877	-1.70621	0.82859	-0.03399	-3.09004
0.79819	-0.0021	-0.1909	0.80208	-0.00438	-0.39778	0.79819	-0.00797	-0.72493	0.79819	-0.01873	-1.70316	0.82847	-0.03403	-3.09365
0.79803	-0.00217	-0.19695	0.80176	-0.00418	-0.38014	0.79803	-0.00803	-0.72992	0.79803	-0.0185	-1.6818	0.82824	-0.03394	-3.0856
0.79788	-0.00205	-0.18641	0.80141	-0.00396	-0.36002	0.79788	-0.00829	-0.75323	0.79788	-0.01841	-1.67375	0.82816	-0.03402	-3.0931
0.79773	-0.00222	-0.20192	0.8014	-0.00412	-0.37473	0.79773	-0.00789	-0.71716	0.79773	-0.01843	-1.67542	0.82808	-0.03411	-3.10059
0.79758	-0.00202	-0.18319	0.80145	-0.00435	-0.39567	0.79758	-0.00819	-0.74463	0.79758	-0.01866	-1.69595	0.82811	-0.03431	-3.1189
0.79742	-0.00226	-0.20519	0.80121	-0.00425	-0.38652	0.79742	-0.00811	-0.73714	0.79742	-0.01888	-1.71675	0.82795	-0.0343	-3.11834
0.79727	-0.00198	-0.18041	0.80083	-0.004	-0.36355	0.79727	-0.00792	-0.72021	0.79727	-0.01883	-1.71148	0.82802	-0.03455	-3.14054
0.79712	-0.00229	-0.20816	0.80073	-0.00405	-0.36857	0.79712	-0.00828	-0.7524	0.79712	-0.01871	-1.70066	0.82771	-0.03437	-3.12472
0.79697	-0.00196	-0.17831	0.80083	-0.00434	-0.39487	0.79697	-0.00793	-0.72132	0.79697	-0.0185	-1.68207	0.82762	-0.03444	-3.1311
0.79681	-0.00229	-0.20844	0.80068	-0.00435	-0.39509	0.79681	-0.00814	-0.73964	0.79681	-0.01846	-1.67819	0.82733	-0.03429	-3.11751
0.79666	-0.00197	-0.17905	0.80025	-0.00403	-0.36665	0.79666	-0.00822	-0.74768	0.79666	-0.01861	-1.69206	0.82714	-0.03424	-3.11279
0.79651	-0.00229	-0.20821	0.80008	-0.00401	-0.36493	0.79651	-0.00792	-0.72021	0.79651	-0.01872	-1.70177	0.82692	-0.03416	-3.10586
0.79636	-0.00197	-0.17919	0.80018	-0.0043	-0.39079	0.79636	-0.00834	-0.75795	0.79636	-0.01881	-1.71009	0.82671	-0.03411	-3.10059
0.7962	-0.00227	-0.20655	0.80008	-0.00436	-0.39603	0.7962	-0.00804	-0.73131	0.7962	-0.01881	-1.71037	0.82656	-0.03411	-3.10059
0.79605	-0.00201	-0.18311	0.7997	-0.0041	-0.3724	0.79605	-0.00801	-0.72826	0.79605	-0.01856	-1.68707	0.8263	-0.03399	-3.09004
0.7959	-0.00223	-0.20283	0.79945	-0.00399	-0.36272	0.7959	-0.00832	-0.75656	0.7959	-0.01836	-1.66931	0.82626	-0.03411	-3.10114
0.79575	-0.0021	-0.19073	0.79954	-0.00427	-0.38782	0.79575	-0.00794	-0.7216	0.79575	-0.01853	-1.68429	0.82623	-0.03425	-3.11363
0.79559	-0.00222	-0.20194	0.79954	-0.00444	-0.40325	0.79559	-0.00826	-0.75073	0.79559	-0.01873	-1.70233	0.82622	-0.03441	-3.12805
0.79544	-0.00213	-0.19343	0.7992	-0.00422	-0.38399	0.79544	-0.00823	-0.74851	0.79544	-0.01891	-1.71925	0.82607	-0.03441	-3.12861
0.79529	-0.00216	-0.19651	0.79886	-0.00401	-0.36482	0.79529	-0.00795	-0.72271	0.79529	-0.01897	-1.7248	0.82619	-0.03472	-3.15635
0.79514	-0.00218	-0.19831	0.79888	-0.00421	-0.38233	0.79514	-0.00838	-0.76155	0.79514	-0.01883	-1.71176	0.82584	-0.0345	-3.13665
0.79498	-0.0021	-0.19115	0.79892	-0.00442	-0.40206	0.79498	-0.00805	-0.73214	0.79498	-0.01866	-1.69622	0.82571	-0.03453	-3.13887
0.79483	-0.00222	-0.20208	0.79863	-0.00427	-0.38863	0.79483	-0.00812	-0.73797	0.79483	-0.01861	-1.69151	0.82551	-0.03447	-3.1336
0.79468	-0.00206	-0.18721	0.79827	-0.00404	-0.36713	0.79468	-0.00836	-0.75961	0.79468	-0.01867	-1.69761	0.8253	-0.0344	-3.1275
0.79453	-0.00226	-0.20572	0.79819	-0.00412	-0.37462	0.79453	-0.00798	-0.72549	0.79453	-0.01886	-1.71453	0.82503	-0.03427	-3.11557
0.79437	-0.00201	-0.18272	0.79827	-0.00438	-0.39837	0.79437	-0.00829	-0.75323	0.79437	-0.01892	-1.72036	0.82482	-0.03421	-3.1103
0.79422	-0.00229	-0.2086	0.79809	-0.00435	-0.39534	0.79422	-0.00816	-0.74185	0.79422	-0.01894	-1.72175	0.8247	-0.03425	-3.11335
0.79407	-0.00198	-0.18011	0.79768	-0.00406	-0.36929	0.79407	-0.00801	-0.72854	0.79407	-0.01872	-1.70149	0.82447	-0.03416	-3.10586
0.79391	-0.00231	-0.21016	0.79752	-0.00405	-0.36857	0.79391	-0.00836	-0.75989	0.79391	-0.01845	-1.67763	0.82437	-0.03422	-3.11085
0.79376	-0.00198	-0.18008	0.79763	-0.00434	-0.39479	0.79376	-0.00797	-0.7241	0.79376	-0.01859	-1.6904	0.82434	-0.03436	-3.12361
0.79361	-0.00231	-0.20993	0.7975	-0.00438	-0.39789	0.79361	-0.00822	-0.74768	0.79361	-0.01873	-1.70316	0.82427	-0.03445	-3.13166
0.79346	-0.00198	-0.18003	0.79712	-0.00411	-0.3737	0.79346	-0.00828	-0.75295	0.79346	-0.01894	-1.72202	0.82415	-0.03448	-3.13499
0.7933	-0.0023	-0.20907	0.79689	-0.00403	-0.36632	0.7933	-0.00796	-0.72382	0.7933	-0.01902	-1.72868	0.82422	-0.03473	-3.15746
0.79315	-0.00201	-0.18258	0.79696	-0.00428	-0.38913	0.79315	-0.00839	-0.76266	0.79315	-0.01885	-1.7137	0.82394	-0.03459	-3.1447
0.793	-0.00226	-0.20533	0.79693	-0.00442	-0.40167	0.793	-0.00809	-0.7352	0.793	-0.01873	-1.70233	0.82379	-0.0346	-3.14553
0.79285	-0.00205	-0.18671	0.79658	-0.00419	-0.38091	0.79285	-0.00809	-0.73575	0.79285	-0.01864	-1.69456	0.82363	-0.03458	-3.14387
0.79269	-0.00222	-0.20189	0.79626	-0.004	-0.3638	0.79269	-0.00838	-0.76183	0.79269	-0.01867	-1.69705	0.8234	-0.03451	-3.13693
0.79254	-0.00209	-0.1901	0.79629	-0.00421	-0.38277	0.79254	-0.00795	-0.72243	0.79254	-0.01894	-1.72175	0.82309	-0.03433	-3.12084
0.79239	-0.00218	-0.19778	0.79633	-0.00443	-0.40233	0.79239	-0.00827	-0.75184	0.79239	-0.01906	-1.73257	0.82292	-0.03431	-3.1189
0.79224	-0.00216	-0.19612	0.79601	-0.00424	-0.38563	0.79224	-0.00823	-0.74796	0.79224	-0.01903	-1.73007	0.82273	-0.03426	-3.11446
0.79208	-0.00212	-0.19229	0.79567	-0.00402	-0.36582	0.79208	-0.00798	-0.72521	0.79208	-0.01881	-1.71037	0.82259	-0.03428	-3.11612
0.79193	-0.00221	-0.20069	0.79562	-0.00415	-0.37711	0.79193	-0.00838	-0.76155	0.79193	-0.01862	-1.69234	0.82243	-0.03427	-3.11529
0.79178	-0.00207	-0.18804	0.79568	-0.00439	-0.39898	0.79178	-0.00807	-0.73381	0.79178	-0.01862	-1.69234	0.82243	-0.03444	-3.13083
0.79163	-0.00225	-0.20447	0.79547	-0.00432	-0.39298	0.79163	-0.00815	-0.74074	0.79163	-0.01876	-1.7051	0.82234	-0.03451	-3.13748
0.79147	-0.00203	-0.18483	0.79508	-0.00405	-0.36832	0.79147	-0.00835	-0.75906	0.79147	-0.01895	-1.72258	0.82223	-0.03456	-3.14137
0.79132	-0.00229	-0.2083	0.79494	-0.00407	-0.36973	0.79132	-0.008	-0.72743	0.79132	-0.019	-1.72729	0.82223	-0.03473	-3.15746
0.79117	-0.002	-0.18186	0.79506	-0.00437	-0.39745	0.79117	-0.00834	-0.75795	0.79117	-0.0189	-1.71842	0.82204	-0.03468	-3.15302
0.79102	-0.00232	-0.21077	0.79492	-0.00439	-0.39867	0.79102	-0.00815	-0.74074	0.79102	-0.01877	-1.70621	0.82191	-0.03471	-3.15552
0.79086	-0.00199	-0.18055	0.79449	-0.00408	-0.37096	0.79086	-0.00805	-0.73187	0.79086	-0.01869	-1.69927	0.82173	-0.03468	-3.15247
0.79071	-0.00231	-0.21035	0.79432	-0.00405	-0.36854	0.79071	-0.00836	-0.76044	0.79071	-0.01869	-1.69872	0.82152	-0.03462	-3.14719
0.79056	-0.00199	-0.18083	0.7944	-0.00431	-0.39218	0.79056	-0.00795	-0.72271	0.79056	-0.01893	-1.72119	0.82118	-0.03441	-3.12805
0.79041	-0.00231	-0.21032	0.79432	-0.0044	-0.39989	0.79041	-0.00825	-0.75018	0.79041	-0.01918	-1.74339	0.82103	-0.03441	-3.12861
0.79025	-0.002	-0.18158	0.79396	-0.00417	-0.37917	0.79025	-0.00828	-0.7524	0.79025	-0.01905	-1.73146	0.82073	-0.03424	-3.11307
0.7901	-0.00228	-0.20738	0.79367	-0.00401	-0.36488	0.7901	-0.00798	-0.72521	0.7901	-0.01888	-1.7162	0.8207	-0.03438	-3.12583
0.78995	-0.00205	-0.18621	0.79371	-0.00423	-0.38413	0.78995	-0.0084	-0.76405	0.78995	-0.01869	-1.69927	0.8205	-0.03433	-3.12056
0.78979	-0.00224	-0.20336	0.79374	-0.00443	-0.4025	0.78979	-0.0081	-0.73631	0.78979	-0.01863	-1.69373	0.82053	-0.03453	-3.13943
0.78964	-0.00209	-0.18976	0.79341	-0.00423	-0.38477	0.78964	-0.00811	-0.73769	0.78964	-0.01879	-1.70843	0.82042	-0.03458	-3.14331
0.78949	-0.0022	-0.19986	0.79306	-0.00402	-0.36513	0.78949	-0.0084	-0.76405	0.78949	-0.01894	-1.72202	0.82034	-0.03466	-3.1508
0.78934	-0.00213	-0.19373	0.79306	-0.00418	-0.38017	0.78934	-0.00797	-0.72493	0.78934	-0.01902	-1.72951	0.82026	-0.03474	-3.15857
0.78918	-0.00214	-0.19459	0.79311	-0.00441	-0.40072	0.78918	-0.0083	-0.75434	0.78918	-0.01898	-1.72591	0.82012	-0.03476	-3.16023
0.78903	-0.00219	-0.19922	0.79286	-0.0043	-0.39079	0.78903	-0.00824	-0.74879	0.78903	-0.01875	-1.70482	0.82006	-0.03486	-3.16939
0.78888	-0.00209	-0.1901	0.79249	-0.00405	-0.36832	0.78888	-0.00801	-0.72798	0.78888	-0.01869	-1.69872	0.81982	-0.03477	-3.16079
0.78873	-0.00223	-0.20297	0.79238	-0.00411	-0.37351	0.78873	-0.00839	-0.76294	0.78873	-0.01868	-1.69844	0.81961	-0.0347	-3.15496
0.78857	-0.00205	-0.18657	0.79248	-0.00439	-0.39936	0.78857	-0.00808	-0.73464	0.78857	-0.01891	-1.71925	0.81931	-0.03453	-3.13915
0.78842	-0.00228	-0.20721	0.79232	-0.00438	-0.39831	0.78842	-0.0082	-0.74518	0.78842	-0.01915	-1.74089	0.81916	-0.03453	-3.13943
0.78827	-0.00202	-0.18344	0.7919	-0.00408	-0.37057	0.78827	-0.00835	-0.75933	0.78827	-0.01907	-1.73395	0.81879	-0.03429	-3.11723
0.78812	-0.00231	-0.21035	0.79174	-0.00407	-0.36962	0.78812	-0.00801	-0.72826	0.78812	-0.01895	-1.72286	0.81883	-0.03451	-3.13693
0.78796	-0.00199	-0.18097	0.79183	-0.00434	-0.39479	0.78796	-0.00839	-0.76266	0.78796	-0.01875	-1.70455	0.81863	-0.03446	-3.13277
0.78781	-0.00233	-0.21182	0.79173	-0.0044	-0.39997	0.78781	-0.00815	-0.74047	0.78781	-0.01869	-1.699	0.8186	-0.0346	-3.14525
0.78766	-0.002	-0.18222	0.79135	-0.00415	-0.37692	0.78766	-0.00809	-0.73575	0.78766	-0.01885	-1.7137	0.8185	-0.03466	-3.15052
0.78751	-0.00232	-0.21129	0.7911	-0.00404	-0.36738	0.78751	-0.0084	-0.76349	0.78751	-0.01896	-1.72341	0.81846	-0.03477	-3.16134
0.78735	-0.002	-0.18211	0.79116	-0.00428	-0.38929	0.78735	-0.00797	-0.72493	0.78735	-0.01906	-1.73284	0.81836	-0.03484	-3.16717
0.7872	-0.00231	-0.21021	0.79115	-0.00444	-0.40319	0.7872	-0.00829	-0.75323	0.7872	-0.01905	-1.73173	0.8182	-0.03483	-3.16606
0.78705	-0.00203	-0.18458	0.79082	-0.00423	-0.3848	0.78705	-0.0083	-0.75434	0.78705	-0.0188	-1.70871	0.81817	-0.03496	-3.17854
0.7869	-0.00226	-0.20552	0.79048	-0.00403	-0.36607	0.7869	-0.00799	-0.7266	0.7869	-0.01862	-1.69234	0.81793	-0.03487	-3.16967
0.78674	-0.00209	-0.1896	0.7905	-0.00422	-0.38388	0.78674	-0.00844	-0.76682	0.78674	-0.01871	-1.70066	0.81771	-0.03479	-3.16273
0.78659	-0.00223	-0.2023	0.79054	-0.00444	-0.40383	0.78659	-0.00812	-0.73797	0.78659	-0.01891	-1.71869	0.81745	-0.03467	-3.15219
0.78644	-0.00212	-0.19276	0.79026	-0.00429	-0.3899	0.78644	-0.00816	-0.74213	0.78644	-0.0191	-1.73617	0.81729	-0.03467	-3.15163
0.78629	-0.00218	-0.19806	0.78991	-0.00407	-0.36979	0.78629	-0.00842	-0.76544	0.78629	-0.01917	-1.74228	0.8169	-0.0344	-3.12694
0.78613	-0.00219	-0.19864	0.78983	-0.00415	-0.37761	0.78613	-0.00801	-0.72854	0.78613	-0.01901	-1.7284	0.81692	-0.03459	-3.1447
0.78598	-0.00212	-0.19265	0.7899	-0.00441	-0.4005	0.78598	-0.00832	-0.75656	0.78598	-0.01884	-1.71231	0.81676	-0.03458	-3.14387
0.78583	-0.00223	-0.20305	0.78972	-0.00438	-0.39798	0.78583	-0.00825	-0.7499	0.78583	-0.01877	-1.70649	0.81667	-0.03465	-3.15025
0.78568	-0.00207	-0.18863	0.78931	-0.00408	-0.37096	0.78568	-0.00805	-0.73159	0.78568	-0.01886	-1.71481	0.81659	-0.03473	-3.15746
0.78552	-0.00228	-0.20727	0.78915	-0.00408	-0.37073	0.78552	-0.0084	-0.76349	0.78552	-0.01904	-1.73118	0.81658	-0.03489	-3.17216
0.78537	-0.00204	-0.1853	0.78927	-0.00438	-0.39798	0.78537	-0.00808	-0.73436	0.78537	-0.0191	-1.73673	0.81647	-0.03495	-3.17688
0.78522	-0.00231	-0.21032	0.78914	-0.00441	-0.40089	0.78522	-0.00826	-0.75073	0.78522	-0.01912	-1.73839	0.81634	-0.03497	-3.17882
0.78506	-0.00201	-0.18277	0.78875	-0.00414	-0.37614	0.78506	-0.00836	-0.75961	0.78506	-0.0189	-1.71842	0.81625	-0.03503	-3.18493
0.78491	-0.00233	-0.21218	0.78853	-0.00406	-0.36948	0.78491	-0.00805	-0.73159	0.78491	-0.01865	-1.69511	0.81606	-0.035	-3.18187
0.78476	-0.00201	-0.18233	0.7886	-0.00432	-0.39273	0.78476	-0.00844	-0.76738	0.78476	-0.01879	-1.70815	0.81579	-0.03486	-3.16939
0.78461	-0.00233	-0.21182	0.78856	-0.00444	-0.40405	0.78461	-0.00816	-0.74158	0.78461	-0.01893	-1.72119	0.81558	-0.0348	-3.16329
0.78445	-0.002	-0.18191	0.78821	-0.00422	-0.38333	0.78445	-0.00813	-0.7388	0.78445	-0.01913	-1.73895	0.8154	-0.03477	-3.16134
0.7843	-0.00232	-0.21124	0.7879	-0.00404	-0.36718	0.7843	-0.00844	-0.76738	0.7843	-0.01921	-1.74672	0.81506	-0.03456	-3.14165
0.78415	-0.00203	-0.18435	0.78792	-0.00424	-0.38566	0.78415	-0.008	-0.72743	0.78415	-0.01904	-1.73118	0.815	-0.03466	-3.15136
0.784	-0.00229	-0.20821	0.78796	-0.00445	-0.40489	0.784	-0.00833	-0.75711	0.784	-0.01892	-1.72008	0.81487	-0.03469	-3.1533
0.78384	-0.00208	-0.18904	0.78765	-0.00427	-0.38841	0.78384	-0.0083	-0.75489	0.78384	-0.01883	-1.71176	0.81473	-0.0347	-3.15469
0.78369	-0.00225	-0.20413	0.78731	-0.00406	-0.36915	0.78369	-0.00803	-0.72992	0.78369	-0.01887	-1.71509	0.81467	-0.03481	-3.16412
0.78354	-0.00209	-0.18963	0.78724	-0.00416	-0.378	0.78354	-0.00844	-0.76682	0.78354	-0.01909	-1.73562	0.81466	-0.03497	-3.17882
0.78339	-0.00219	-0.199	0.78731	-0.00441	-0.40086	0.78339	-0.00812	-0.73825	0.78339	-0.01921	-1.74672	0.81453	-0.03499	-3.18132
0.78323	-0.00216	-0.19651	0.78709	-0.00434	-0.39415	0.78323	-0.00817	-0.74296	0.78323	-0.01919	-1.7445	0.81448	-0.0351	-3.19131
0.78308	-0.00214	-0.1944	0.7867	-0.00406	-0.36943	0.78308	-0.00841	-0.76433	0.78308	-0.01897	-1.7248	0.81428	-0.03506	-3.18714
0.78293	-0.00222	-0.20142	0.78656	-0.00408	-0.37096	0.78293	-0.00803	-0.72992	0.78293	-0.01877	-1.70593	0.81416	-0.03509	-3.18992
0.78278	-0.00209	-0.19029	0.78668	-0.00438	-0.39845	0.78278	-0.00834	-0.75822	0.78278	-0.01878	-1.7076	0.81384	-0.03491	-3.17327
0.78262	-0.00226	-0.20536	0.78654	-0.0044	-0.4	0.78262	-0.00823	-0.74851	0.78262	-0.01892	-1.72036	0.81367	-0.03489	-3.17161
0.78247	-0.00205	-0.18621	0.78614	-0.00412	-0.37453	0.78247	-0.00807	-0.73381	0.78247	-0.01913	-1.73867	0.81347	-0.03483	-3.16634
0.78232	-0.0023	-0.2091	0.78595	-0.00408	-0.37048	0.78232	-0.00842	-0.76516	0.78232	-0.01918	-1.74339	0.81321	-0.03471	-3.1558
0.78217	-0.00202	-0.18385	0.78603	-0.00434	-0.39493	0.78217	-0.00806	-0.73242	0.78217	-0.01907	-1.73368	0.81309	-0.03474	-3.15857
0.78201	-0.00234	-0.21232	0.78595	-0.00443	-0.40242	0.78201	-0.00829	-0.75378	0.78201	-0.01894	-1.72147	0.81289	-0.0347	-3.15413
0.78186	-0.00201	-0.18233	0.78559	-0.00419	-0.38116	0.78186	-0.00836	-0.76017	0.78186	-0.01885	-1.71398	0.8128	-0.03477	-3.16051
0.78171	-0.00234	-0.21298	0.7853	-0.00404	-0.36715	0.78171	-0.00804	-0.73131	0.78171	-0.01886	-1.71481	0.81272	-0.03485	-3.168
0.78156	-0.00201	-0.18299	0.78535	-0.00426	-0.38752	0.78156	-0.00848	-0.77071	0.78156	-0.01912	-1.73811	0.81277	-0.03508	-3.18881
0.7814	-0.00234	-0.2126	0.78537	-0.00446	-0.40566	0.7814	-0.00817	-0.74296	0.7814	-0.01936	-1.76003	0.81262	-0.03507	-3.18825
0.78125	-0.00203	-0.18494	0.78505	-0.00427	-0.3881	0.78125	-0.00816	-0.74158	0.78125	-0.01924	-1.74866	0.81264	-0.03528	-3.20684
0.7811	-0.00227	-0.20655	0.78465	-0.004	-0.36338	0.7811	-0.00841	-0.7646	0.7811	-0.01901	-1.72785	0.8123	-0.03506	-3.18714
0.78094	-0.00203	-0.18463	0.78466	-0.00417	-0.37906	0.78094	-0.00798	-0.72521	0.78094	-0.01883	-1.71148	0.81221	-0.03513	-3.19408
0.78079	-0.00223	-0.20286	0.78471	-0.0044	-0.40036	0.78079	-0.0083	-0.75489	0.78079	-0.01875	-1.70482	0.81191	-0.03496	-3.17854
0.78064	-0.00208	-0.18913	0.78446	-0.0043	-0.39063	0.78064	-0.00827	-0.75184	0.78064	-0.01893	-1.72119	0.81173	-0.03493	-3.17522
0.78049	-0.00221	-0.20078	0.78409	-0.00405	-0.36829	0.78049	-0.00801	-0.72826	0.78049	-0.01906	-1.73312	0.8115	-0.03484	-3.16772
0.78033	-0.00213	-0.19326	0.78399	-0.00411	-0.37359	0.78033	-0.00844	-0.76682	0.78033	-0.01915	-1.74117	0.8113	-0.0348	-3.16329
0.78018	-0.00216	-0.19603	0.78409	-0.00439	-0.39934	0.78018	-0.00811	-0.73769	0.78018	-0.01912	-1.73811	0.81114	-0.03479	-3.16245
0.78003	-0.0022	-0.20039	0.78393	-0.00438	-0.39848	0.78003	-0.00819	-0.74491	0.78003	-0.01889	-1.71758	0.81089	-0.03467	-3.15219
0.77988	-0.00211	-0.19193	0.78351	-0.00409	-0.37154	0.77988	-0.0084	-0.76405	0.77988	-0.01882	-1.7112	0.81085	-0.0348	-3.16329
0.77972	-0.00225	-0.20461	0.78335	-0.00407	-0.37007	0.77972	-0.00806	-0.7327	0.77972	-0.01881	-1.71037	0.81077	-0.03488	-3.17105
0.77957	-0.00207	-0.18838	0.78345	-0.00436	-0.39626	0.77957	-0.00836	-0.76044	0.77957	-0.01905	-1.73173	0.81077	-0.03505	-3.18659
0.77942	-0.00229	-0.20832	0.78335	-0.00442	-0.402	0.77942	-0.00823	-0.74824	0.77942	-0.01929	-1.75393	0.81063	-0.03506	-3.1877
0.77927	-0.00204	-0.18538	0.78297	-0.00416	-0.37822	0.77927	-0.00811	-0.73686	0.77927	-0.01922	-1.74755	0.81072	-0.03534	-3.21239
0.77911	-0.00233	-0.21221	0.78273	-0.00406	-0.36907	0.77911	-0.00843	-0.76599	0.77911	-0.0191	-1.73645	0.81039	-0.03514	-3.19464
0.77896	-0.00201	-0.18274	0.78278	-0.0043	-0.39049	0.77896	-0.00805	-0.73159	0.77896	-0.01889	-1.71703	0.81028	-0.03519	-3.19907
0.77881	-0.00235	-0.21362	0.78278	-0.00446	-0.40558	0.77881	-0.00832	-0.75656	0.77881	-0.01884	-1.71259	0.81004	-0.0351	-3.19047
0.77866	-0.00202	-0.18385	0.78245	-0.00426	-0.38707	0.77866	-0.00836	-0.75989	0.77866	-0.01898	-1.72591	0.80984	-0.03504	-3.18548
0.7785	-0.00234	-0.21293	0.78211	-0.00405	-0.36829	0.7785	-0.00806	-0.73298	0.7785	-0.01912	-1.73839	0.80956	-0.0349	-3.17272
0.77835	-0.00203	-0.18433	0.78212	-0.00423	-0.38491	0.77835	-0.00849	-0.77209	0.77835	-0.0192	-1.74561	0.80937	-0.03485	-3.16828
0.7782	-0.00234	-0.21232	0.78217	-0.00446	-0.40544	0.7782	-0.00819	-0.74435	0.7782	-0.0192	-1.74561	0.80925	-0.03488	-3.17133
0.77805	-0.00206	-0.18727	0.78188	-0.00431	-0.39196	0.77805	-0.00819	-0.74463	0.77805	-0.01894	-1.72147	0.80901	-0.03479	-3.16301
0.77789	-0.00229	-0.20788	0.78153	-0.00409	-0.37184	0.77789	-0.00847	-0.77043	0.77789	-0.01877	-1.70593	0.80893	-0.03488	-3.1705
0.77774	-0.0021	-0.19076	0.78146	-0.00418	-0.38042	0.77774	-0.00804	-0.73048	0.77774	-0.01886	-1.71426	0.80888	-0.03499	-3.18076
0.77759	-0.00225	-0.20447	0.78154	-0.00444	-0.40394	0.77759	-0.00837	-0.76072	0.77759	-0.01907	-1.73368	0.80882	-0.0351	-3.19047
0.77744	-0.00213	-0.19401	0.78136	-0.0044	-0.40039	0.77744	-0.00832	-0.75628	0.77744	-0.01926	-1.75115	0.8087	-0.03513	-3.19353
0.77728	-0.0022	-0.20042	0.78095	-0.00411	-0.37409	0.77728	-0.00808	-0.73436	0.77728	-0.01931	-1.75532	0.80878	-0.03539	-3.21711
0.77713	-0.00221	-0.20058	0.78079	-0.00411	-0.37362	0.77713	-0.00847	-0.77043	0.77713	-0.01916	-1.742	0.80848	-0.03523	-3.2024
0.77698	-0.00215	-0.19551	0.78091	-0.00442	-0.40164	0.77698	-0.00818	-0.74324	0.77698	-0.01899	-1.72674	0.80834	-0.03524	-3.20351
0.77682	-0.00225	-0.20499	0.78078	-0.00444	-0.4038	0.77682	-0.00826	-0.75129	0.77682	-0.01894	-1.72147	0.80816	-0.03521	-3.20102
0.77667	-0.00211	-0.19137	0.78038	-0.00417	-0.37872	0.77667	-0.00845	-0.76821	0.77667	-0.01902	-1.72924	0.80795	-0.03514	-3.19464
0.77652	-0.0023	-0.2093	0.78017	-0.0041	-0.37268	0.77652	-0.00811	-0.73714	0.77652	-0.0192	-1.74533	0.80765	-0.03497	-3.17938
0.77637	-0.00206	-0.18746	0.78024	-0.00435	-0.39526	0.77637	-0.00847	-0.7696	0.77637	-0.01927	-1.75199	0.80746	-0.03493	-3.17549
0.77621	-0.00233	-0.21174	0.7802	-0.00448	-0.4071	0.77621	-0.00824	-0.74935	0.77621	-0.01928	-1.75282	0.80728	-0.03491	-3.17355
0.77606	-0.00203	-0.18491	0.77984	-0.00425	-0.38605	0.77606	-0.00817	-0.74241	0.77606	-0.01904	-1.73062	0.80712	-0.0349	-3.17272
0.77591	-0.00236	-0.21429	0.77953	-0.00407	-0.3699	0.77591	-0.00848	-0.77098	0.77591	-0.01879	-1.70815	0.80699	-0.03492	-3.17466
0.77576	-0.00203	-0.18444	0.77956	-0.00428	-0.38877	0.77576	-0.00806	-0.73298	0.77576	-0.01894	-1.72147	0.80699	-0.03509	-3.18992
0.7756	-0.00235	-0.2134	0.7796	-0.00449	-0.40785	0.7756	-0.00837	-0.76072	0.7756	-0.01909	-1.7359	0.80689	-0.03515	-3.19575
0.77545	-0.00202	-0.18391	0.77929	-0.00431	-0.39204	0.77545	-0.00839	-0.76266	0.77545	-0.01929	-1.75365	0.80678	-0.0352	-3.19991
0.7753	-0.00234	-0.21315	0.77894	-0.0041	-0.37229	0.7753	-0.00809	-0.7352	0.7753	-0.01936	-1.76003	0.80679	-0.03539	-3.21683
0.77515	-0.00205	-0.18605	0.7789	-0.00422	-0.38391	0.77515	-0.00853	-0.77542	0.77515	-0.01919	-1.7445	0.80658	-0.03532	-3.21073
0.77499	-0.00232	-0.21054	0.77896	-0.00446	-0.4053	0.77499	-0.00821	-0.74629	0.77499	-0.01908	-1.73479	0.80645	-0.03534	-3.21267
0.77484	-0.0021	-0.19107	0.77875	-0.00439	-0.39878	0.77484	-0.00825	-0.74962	0.77484	-0.019	-1.72702	0.80628	-0.03532	-3.211
0.77469	-0.00228	-0.20694	0.77836	-0.00412	-0.3747	0.77469	-0.00851	-0.77404	0.77469	-0.01903	-1.73035	0.80607	-0.03526	-3.20518
0.77454	-0.00213	-0.19393	0.77822	-0.00414	-0.37653	0.77454	-0.00809	-0.73575	0.77454	-0.01929	-1.75393	0.80574	-0.03506	-3.18714
0.77438	-0.00224	-0.20366	0.77834	-0.00444	-0.40372	0.77438	-0.00842	-0.76516	0.77438	-0.0194	-1.76336	0.80558	-0.03505	-3.18631
0.77423	-0.0022	-0.19964	0.7782	-0.00445	-0.40494	0.77423	-0.00836	-0.76044	0.77423	-0.01938	-1.76225	0.80532	-0.03493	-3.17577
0.77408	-0.00218	-0.19795	0.77779	-0.00417	-0.37928	0.77408	-0.00814	-0.73964	0.77408	-0.01916	-1.74172	0.80525	-0.03503	-3.18409
0.77393	-0.00225	-0.20463	0.7776	-0.00413	-0.37542	0.77393	-0.0085	-0.77293	0.77393	-0.01895	-1.72313	0.80507	-0.03499	-3.18104
0.77377	-0.00217	-0.19753	0.77773	-0.00444	-0.40383	0.77377	-0.00826	-0.75101	0.77377	-0.01904	-1.73118	0.80514	-0.03525	-3.20435
0.77362	-0.00234	-0.2126	0.77765	-0.00453	-0.41149	0.77362	-0.00839	-0.76294	0.77362	-0.01917	-1.74311	0.80504	-0.0353	-3.20906
0.77347	-0.00213	-0.19326	0.77728	-0.00428	-0.3891	0.77347	-0.00852	-0.77431	0.77347	-0.01937	-1.76086	0.80494	-0.03536	-3.21489
0.77332	-0.00236	-0.2149	0.777	-0.00414	-0.3765	0.77332	-0.00819	-0.74463	0.77332	-0.01942	-1.76558	0.80487	-0.03546	-3.22321
0.77316	-0.00208	-0.18918	0.77703	-0.00435	-0.39529	0.77316	-0.00857	-0.77875	0.77316	-0.0193	-1.75421	0.80472	-0.03546	-3.22377
0.77301	-0.00238	-0.21665	0.77705	-0.00454	-0.41279	0.77301	-0.00831	-0.75517	0.77301	-0.01918	-1.74394	0.80465	-0.03555	-3.23153
0.77286	-0.00206	-0.18718	0.77672	-0.00434	-0.39498	0.77286	-0.00826	-0.75101	0.77286	-0.01911	-1.73701	0.80442	-0.03547	-3.22432
0.77271	-0.00239	-0.21712	0.77637	-0.00412	-0.37481	0.77271	-0.00857	-0.77875	0.77271	-0.0191	-1.73673	0.80422	-0.03541	-3.21877
0.77255	-0.00205	-0.18655	0.77637	-0.00429	-0.38982	0.77255	-0.00814	-0.73991	0.77255	-0.01936	-1.76031	0.80389	-0.03521	-3.20102
0.7724	-0.00238	-0.21662	0.77641	-0.00451	-0.40985	0.7724	-0.00845	-0.76821	0.7724	-0.01959	-1.78084	0.80376	-0.03524	-3.20351
0.77225	-0.00206	-0.18729	0.77616	-0.0044	-0.40006	0.77225	-0.00846	-0.76932	0.77225	-0.01948	-1.77057	0.80338	-0.03499	-3.18049
0.77209	-0.00235	-0.21371	0.77579	-0.00415	-0.37745	0.77209	-0.00816	-0.74213	0.77209	-0.01929	-1.75337	0.80343	-0.03521	-3.20046
0.77194	-0.0021	-0.19135	0.77569	-0.00421	-0.38261	0.77194	-0.0086	-0.7818	0.77194	-0.01911	-1.73701	0.80322	-0.03515	-3.19519
0.77179	-0.0023	-0.20946	0.7758	-0.0045	-0.40921	0.77179	-0.00827	-0.75212	0.77179	-0.01904	-1.73062	0.80321	-0.0353	-3.20934
0.77164	-0.00214	-0.19459	0.77563	-0.00449	-0.40774	0.77164	-0.00833	-0.75684	0.77164	-0.0192	-1.74588	0.8031	-0.03535	-3.21378
0.77148	-0.00226	-0.20583	0.77521	-0.00418	-0.38022	0.77148	-0.00857	-0.77931	0.77148	-0.01937	-1.76059	0.80306	-0.03548	-3.22571
0.77133	-0.00219	-0.19911	0.77503	-0.00416	-0.37811	0.77133	-0.00817	-0.74241	0.77133	-0.01943	-1.76614	0.80296	-0.03553	-3.23042
0.77118	-0.0022	-0.19986	0.77513	-0.00444	-0.40375	0.77118	-0.00849	-0.77154	0.77118	-0.01938	-1.76225	0.80281	-0.03553	-3.23042
0.77103	-0.00225	-0.20433	0.77502	-0.00449	-0.40819	0.77103	-0.0084	-0.76377	0.77103	-0.01916	-1.742	0.80276	-0.03566	-3.24152
0.77087	-0.00215	-0.19562	0.77466	-0.00425	-0.38641	0.77087	-0.00821	-0.74602	0.77087	-0.0191	-1.73673	0.80253	-0.03557	-3.2332
0.77072	-0.00229	-0.20852	0.7744	-0.00413	-0.37589	0.77072	-0.00855	-0.77737	0.77072	-0.0191	-1.73617	0.80231	-0.0355	-3.2271
0.77057	-0.00211	-0.19171	0.77446	-0.00437	-0.39698	0.77057	-0.00822	-0.74768	0.77057	-0.01933	-1.75698	0.80202	-0.03534	-3.21295
0.77042	-0.00233	-0.21215	0.77445	-0.00453	-0.41157	0.77042	-0.00841	-0.76433	0.77042	-0.01958	-1.77973	0.80187	-0.03534	-3.21267
0.77026	-0.00207	-0.1886	0.77411	-0.00432	-0.39318	0.77026	-0.00851	-0.77404	0.77026	-0.01949	-1.77141	0.80148	-0.03508	-3.18881
0.77011	-0.00237	-0.21551	0.77378	-0.00412	-0.3744	0.77011	-0.00819	-0.74463	0.77011	-0.01935	-1.7592	0.80152	-0.03529	-3.20795
0.76996	-0.00205	-0.18627	0.77379	-0.00431	-0.39149	0.76996	-0.00861	-0.78291	0.76996	-0.01915	-1.74117	0.80134	-0.03526	-3.20573
0.76981	-0.00238	-0.21626	0.77383	-0.00453	-0.41149	0.76981	-0.00832	-0.756	0.76981	-0.01909	-1.7359	0.80126	-0.03535	-3.21322
0.76965	-0.00205	-0.18646	0.77355	-0.00438	-0.39839	0.76965	-0.00829	-0.75406	0.76965	-0.01926	-1.75115	0.80119	-0.03544	-3.22155
0.7695	-0.00238	-0.21629	0.77318	-0.00414	-0.37614	0.7695	-0.0086	-0.78153	0.7695	-0.01937	-1.76086	0.80117	-0.03559	-3.23514
0.76935	-0.00205	-0.1866	0.77312	-0.00424	-0.38563	0.76935	-0.00816	-0.74185	0.76935	-0.01947	-1.77002	0.80108	-0.03565	-3.24124
0.7692	-0.00237	-0.21501	0.7732	-0.0045	-0.40935	0.7692	-0.00847	-0.77043	0.7692	-0.01945	-1.76863	0.80092	-0.03564	-3.24041
0.76904	-0.0021	-0.19098	0.77302	-0.00447	-0.40602	0.76904	-0.00846	-0.76877	0.76904	-0.0192	-1.74505	0.80084	-0.03572	-3.24763
0.76889	-0.00232	-0.21096	0.7726	-0.00417	-0.37931	0.76889	-0.00818	-0.74352	0.76889	-0.01903	-1.72979	0.80065	-0.03569	-3.2443
0.76874	-0.00214	-0.1942	0.77244	-0.00416	-0.37836	0.76874	-0.00862	-0.78319	0.76874	-0.01911	-1.73756	0.80039	-0.03556	-3.23292
0.76859	-0.00228	-0.20735	0.77256	-0.00446	-0.40558	0.76859	-0.00829	-0.75351	0.76859	-0.01932	-1.7567	0.80016	-0.03548	-3.22543
0.76843	-0.00217	-0.19745	0.77244	-0.0045	-0.40888	0.76843	-0.00835	-0.75906	0.76843	-0.01952	-1.77418	0.79999	-0.03546	-3.22349
0.76828	-0.00223	-0.20258	0.77204	-0.00423	-0.38427	0.76828	-0.00858	-0.77986	0.76828	-0.01954	-1.77668	0.79963	-0.03523	-3.20268
0.76813	-0.00224	-0.2035	0.77183	-0.00415	-0.37772	0.76813	-0.00821	-0.74657	0.76813	-0.01941	-1.76447	0.79961	-0.03538	-3.216
0.76797	-0.00217	-0.19756	0.77189	-0.0044	-0.40011	0.76797	-0.00852	-0.77487	0.76797	-0.01923	-1.74838	0.79945	-0.03537	-3.21544
0.76782	-0.00229	-0.2081	0.77186	-0.00453	-0.41215	0.76782	-0.0084	-0.76405	0.76782	-0.01918	-1.74394	0.79933	-0.0354	-3.21849
0.76767	-0.00213	-0.19381	0.77151	-0.00431	-0.39212	0.76767	-0.00825	-0.74962	0.76767	-0.01927	-1.75199	0.79926	-0.03549	-3.22682
0.76752	-0.00234	-0.21235	0.77119	-0.00413	-0.37562	0.76752	-0.00859	-0.7807	0.76752	-0.01945	-1.7678	0.79928	-0.03569	-3.24485
0.76736	-0.00209	-0.19032	0.77122	-0.00433	-0.39393	0.76736	-0.00822	-0.7474	0.76736	-0.0195	-1.77307	0.79915	-0.03572	-3.24707
0.76721	-0.00237	-0.21504	0.77126	-0.00454	-0.41312	0.76721	-0.00846	-0.76932	0.76721	-0.01953	-1.77501	0.79907	-0.0358	-3.25456
0.76706	-0.00206	-0.18705	0.77095	-0.00437	-0.39748	0.76706	-0.00852	-0.77487	0.76706	-0.01929	-1.75365	0.79891	-0.03578	-3.2529
0.76691	-0.00239	-0.21729	0.7706	-0.00415	-0.37761	0.76691	-0.00822	-0.74713	0.76691	-0.01904	-1.73062	0.79876	-0.03579	-3.25401
0.76675	-0.00206	-0.18754	0.77056	-0.00428	-0.38871	0.76675	-0.00864	-0.78569	0.76675	-0.01918	-1.74366	0.79846	-0.03563	-3.23902
0.7666	-0.00239	-0.21731	0.77063	-0.00452	-0.41102	0.7666	-0.00834	-0.75795	0.7666	-0.01933	-1.75754	0.79829	-0.0356	-3.23653
0.76645	-0.00206	-0.18702	0.7704	-0.00444	-0.40408	0.76645	-0.00832	-0.75656	0.76645	-0.01953	-1.77501	0.79809	-0.03555	-3.23153
0.7663	-0.00237	-0.21581	0.77001	-0.00417	-0.37944	0.7663	-0.00862	-0.78375	0.7663	-0.01961	-1.78278	0.79783	-0.03543	-3.22071
0.76614	-0.00208	-0.18921	0.76987	-0.00419	-0.381	0.76614	-0.00818	-0.7438	0.76614	-0.01944	-1.76725	0.7977	-0.03546	-3.22321
0.76599	-0.00234	-0.21296	0.76999	-0.00449	-0.40855	0.76599	-0.00851	-0.77348	0.76599	-0.01932	-1.75643	0.79752	-0.03543	-3.22099
0.76584	-0.00213	-0.19384	0.76985	-0.0045	-0.40932	0.76584	-0.00847	-0.76988	0.76584	-0.01923	-1.7481	0.79741	-0.03547	-3.2246
0.76569	-0.0023	-0.20891	0.76944	-0.00422	-0.38341	0.76569	-0.00821	-0.74657	0.76569	-0.01927	-1.75171	0.79734	-0.03556	-3.23292
0.76553	-0.00217	-0.19723	0.76925	-0.00418	-0.37972	0.76553	-0.00863	-0.7843	0.76553	-0.01953	-1.77557	0.79737	-0.03577	-3.25179
0.76538	-0.00226	-0.20558	0.76934	-0.00445	-0.40414	0.76538	-0.00831	-0.75573	0.76538	-0.01963	-1.78417	0.79721	-0.03577	-3.25151
0.76523	-0.00223	-0.20239	0.76927	-0.00454	-0.41263	0.76523	-0.00837	-0.76127	0.76523	-0.0196	-1.78223	0.79725	-0.03597	-3.27037
0.76508	-0.0022	-0.19956	0.76889	-0.00429	-0.39004	0.76508	-0.00859	-0.78097	0.76508	-0.0194	-1.76364	0.79696	-0.03583	-3.25706
0.76492	-0.00228	-0.20702	0.76861	-0.00414	-0.37661	0.76492	-0.00824	-0.74879	0.76492	-0.01919	-1.7445	0.79687	-0.03589	-3.26316
0.76477	-0.00215	-0.19537	0.76865	-0.00436	-0.3964	0.76477	-0.00856	-0.7782	0.76477	-0.01922	-1.74699	0.79656	-0.03572	-3.24763
0.76462	-0.00232	-0.2106	0.76867	-0.00455	-0.41371	0.76462	-0.0084	-0.76322	0.76462	-0.01936	-1.75975	0.79637	-0.03568	-3.24374
0.76447	-0.00211	-0.1919	0.76835	-0.00437	-0.39687	0.76447	-0.00829	-0.75406	0.76447	-0.01955	-1.77751	0.79616	-0.03561	-3.23764
0.76431	-0.00236	-0.21479	0.768	-0.00415	-0.37686	0.76431	-0.00861	-0.78291	0.76431	-0.0196	-1.78195	0.79597	-0.03557	-3.2332
0.76416	-0.00208	-0.18904	0.768	-0.00431	-0.39218	0.76416	-0.00822	-0.74685	0.76416	-0.01949	-1.77196	0.79581	-0.03556	-3.23237
0.76401	-0.00234	-0.21282	0.76799	-0.00448	-0.40705	0.76401	-0.00843	-0.76655	0.76401	-0.0193	-1.75476	0.79551	-0.03539	-3.21739
0.76385	-0.00201	-0.18313	0.76775	-0.00438	-0.39784	0.76385	-0.00847	-0.76988	0.76385	-0.01922	-1.74755	0.79545	-0.0355	-3.2271
0.7637	-0.00236	-0.21451	0.76738	-0.00413	-0.37589	0.7637	-0.00818	-0.7438	0.7637	-0.01923	-1.7481	0.79537	-0.03558	-3.23431
0.76355	-0.00204	-0.18555	0.76728	-0.00419	-0.3813	0.76355	-0.00861	-0.78264	0.76355	-0.01949	-1.77168	0.79538	-0.03576	-3.25095
0.7634	-0.00236	-0.21451	0.76739	-0.00448	-0.40747	0.7634	-0.0083	-0.75489	0.7634	-0.01972	-1.79277	0.79523	-0.03577	-3.25206
0.76324	-0.00205	-0.18655	0.76723	-0.00448	-0.40691	0.76324	-0.00831	-0.75573	0.76324	-0.01959	-1.78084	0.79533	-0.03605	-3.27731
0.76309	-0.00234	-0.2129	0.76681	-0.00418	-0.37986	0.76309	-0.00861	-0.78264	0.76309	-0.01942	-1.7653	0.79499	-0.03584	-3.25789
0.76294	-0.00211	-0.19165	0.76665	-0.00417	-0.37864	0.76294	-0.00817	-0.74269	0.76294	-0.01924	-1.74921	0.7949	-0.03591	-3.26427
0.76279	-0.0023	-0.20902	0.76674	-0.00444	-0.40394	0.76279	-0.0085	-0.77265	0.76279	-0.01917	-1.74311	0.79464	-0.03578	-3.25317
0.76263	-0.00215	-0.1959	0.76664	-0.0045	-0.40924	0.76263	-0.00845	-0.76821	0.76263	-0.01934	-1.75837	0.79443	-0.03573	-3.2479
0.76248	-0.00227	-0.20627	0.76626	-0.00425	-0.38624	0.76248	-0.00822	-0.74713	0.76248	-0.0195	-1.77252	0.79418	-0.03561	-3.23736
0.76233	-0.0022	-0.20006	0.76601	-0.00414	-0.37648	0.76233	-0.0086	-0.7818	0.76233	-0.01959	-1.78056	0.79398	-0.03556	-3.23264
0.76218	-0.00221	-0.20078	0.76606	-0.00437	-0.39712	0.76218	-0.0083	-0.75434	0.76218	-0.01953	-1.77529	0.79386	-0.0356	-3.23625
0.76202	-0.00227	-0.20619	0.76607	-0.00455	-0.41365	0.76202	-0.00839	-0.76294	0.76202	-0.01932	-1.75643	0.7936	-0.03548	-3.22543
0.76187	-0.00216	-0.1962	0.76573	-0.00434	-0.39454	0.76187	-0.00858	-0.77959	0.76187	-0.01925	-1.75032	0.79354	-0.03558	-3.23486
0.76172	-0.00232	-0.21126	0.7654	-0.00413	-0.37584	0.76172	-0.00825	-0.74962	0.76172	-0.01926	-1.7506	0.79348	-0.03569	-3.24457
0.76157	-0.00212	-0.19243	0.76541	-0.00432	-0.39273	0.76157	-0.00858	-0.78042	0.76157	-0.01947	-1.7703	0.79343	-0.0358	-3.25456
0.76141	-0.00235	-0.21382	0.76545	-0.00454	-0.41254	0.76141	-0.00837	-0.76072	0.76141	-0.01973	-1.79332	0.7933	-0.03583	-3.25706
0.76126	-0.00209	-0.18971	0.76518	-0.0044	-0.40036	0.76126	-0.0083	-0.75434	0.76126	-0.01963	-1.78445	0.7934	-0.03611	-3.28286
0.76111	-0.00239	-0.21737	0.76482	-0.00417	-0.37889	0.76111	-0.00862	-0.78347	0.76111	-0.01951	-1.77335	0.79308	-0.03592	-3.26566
0.76096	-0.00206	-0.18752	0.76474	-0.00425	-0.38644	0.76096	-0.0082	-0.74518	0.76096	-0.01929	-1.75393	0.79294	-0.03593	-3.26677
0.7608	-0.0024	-0.21806	0.76482	-0.00452	-0.4106	0.7608	-0.00849	-0.77209	0.7608	-0.01924	-1.74949	0.79274	-0.03589	-3.26261
0.76065	-0.00207	-0.18849	0.76465	-0.00449	-0.40841	0.76065	-0.00851	-0.77404	0.76065	-0.01941	-1.76447	0.79253	-0.03582	-3.2565
0.7605	-0.0024	-0.21826	0.76423	-0.0042	-0.38161	0.7605	-0.00822	-0.74768	0.7605	-0.01952	-1.77446	0.79223	-0.03566	-3.24152
0.76035	-0.00208	-0.18946	0.76407	-0.00419	-0.38064	0.76035	-0.00866	-0.78763	0.76035	-0.01961	-1.78306	0.79206	-0.03563	-3.23902
0.76019	-0.00239	-0.21692	0.76419	-0.00449	-0.40805	0.76019	-0.00835	-0.75878	0.76019	-0.01961	-1.7825	0.7919	-0.03563	-3.23875
0.76004	-0.00211	-0.19223	0.76407	-0.00452	-0.41132	0.76004	-0.00838	-0.76211	0.76004	-0.01935	-1.75864	0.79171	-0.03558	-3.23486
0.75989	-0.00233	-0.21212	0.76367	-0.00425	-0.3863	0.75989	-0.00865	-0.78597	0.75989	-0.01919	-1.74422	0.79159	-0.03562	-3.23819
0.75974	-0.00216	-0.19651	0.76346	-0.00418	-0.38005	0.75974	-0.00823	-0.74851	0.75974	-0.01927	-1.75199	0.79159	-0.03579	-3.25401
0.75958	-0.0023	-0.20916	0.76353	-0.00443	-0.40272	0.75958	-0.00854	-0.77653	0.75958	-0.01948	-1.77113	0.7915	-0.03586	-3.26011
0.75943	-0.0022	-0.20008	0.7635	-0.00457	-0.4154	0.75943	-0.00848	-0.77071	0.75943	-0.01968	-1.78916	0.79137	-0.03588	-3.26205
0.75928	-0.00225	-0.20436	0.76314	-0.00435	-0.39504	0.75928	-0.00827	-0.75212	0.75928	-0.01971	-1.79166	0.79142	-0.03611	-3.28286
0.75912	-0.00227	-0.20624	0.76283	-0.00416	-0.37817	0.75912	-0.00863	-0.78458	0.75912	-0.01958	-1.78001	0.79118	-0.03601	-3.27398
0.75897	-0.00219	-0.19917	0.76285	-0.00436	-0.39656	0.75897	-0.00833	-0.75684	0.75897	-0.0194	-1.76336	0.79102	-0.03601	-3.27398
0.75882	-0.00232	-0.21052	0.76289	-0.00457	-0.41579	0.75882	-0.00847	-0.76988	0.75882	-0.01934	-1.75809	0.79086	-0.036	-3.27315
0.75867	-0.00215	-0.19534	0.76259	-0.0044	-0.40028	0.75867	-0.00861	-0.78264	0.75867	-0.01944	-1.76697	0.79065	-0.03593	-3.26677
0.75851	-0.00236	-0.21479	0.76224	-0.00418	-0.38008	0.75851	-0.00827	-0.75212	0.75851	-0.0196	-1.78223	0.79032	-0.03574	-3.24929
0.75836	-0.00211	-0.19204	0.76219	-0.0043	-0.39121	0.75836	-0.00866	-0.78763	0.75836	-0.01967	-1.78833	0.79017	-0.03574	-3.24873
0.75821	-0.0024	-0.21778	0.76226	-0.00455	-0.41382	0.75821	-0.0084	-0.76322	0.75821	-0.0197	-1.79055	0.78992	-0.03563	-3.23902
0.75806	-0.00208	-0.1894	0.76205	-0.00448	-0.40769	0.75806	-0.00837	-0.76072	0.75806	-0.01945	-1.76863	0.78984	-0.03571	-3.24679
0.7579	-0.00242	-0.21978	0.76165	-0.00421	-0.38241	0.7579	-0.00866	-0.78763	0.7579	-0.0192	-1.74533	0.78966	-0.03568	-3.24402
0.75775	-0.00208	-0.18949	0.76151	-0.00422	-0.38383	0.75775	-0.00824	-0.74879	0.75775	-0.01935	-1.7592	0.78967	-0.03587	-3.26066
0.7576	-0.00241	-0.21878	0.76163	-0.00453	-0.41146	0.7576	-0.00854	-0.77681	0.7576	-0.01951	-1.7739	0.78956	-0.03592	-3.2651
0.75745	-0.00209	-0.18968	0.76149	-0.00454	-0.41263	0.75745	-0.00855	-0.77737	0.75745	-0.01969	-1.79027	0.78947	-0.03598	-3.27121
0.75729	-0.00241	-0.21887	0.76108	-0.00426	-0.38705	0.75729	-0.00827	-0.75212	0.75729	-0.01978	-1.79804	0.78941	-0.03609	-3.28092
0.75714	-0.00211	-0.19226	0.76089	-0.00421	-0.38277	0.75714	-0.00869	-0.79013	0.75714	-0.0196	-1.78195	0.78927	-0.03611	-3.2823
0.75699	-0.00236	-0.21448	0.76097	-0.00448	-0.4071	0.75699	-0.00838	-0.76183	0.75699	-0.01949	-1.77168	0.78918	-0.03617	-3.28813
0.75684	-0.00216	-0.19667	0.7609	-0.00457	-0.41546	0.75684	-0.00844	-0.7671	0.75684	-0.0194	-1.76336	0.78897	-0.03611	-3.28258
0.75668	-0.00237	-0.21543	0.76058	-0.00438	-0.39848	0.75668	-0.00874	-0.79429	0.75668	-0.0195	-1.77279	0.78881	-0.03609	-3.28119
0.75653	-0.00224	-0.20352	0.76029	-0.00422	-0.38391	0.75653	-0.00833	-0.75767	0.75653	-0.01975	-1.79554	0.78848	-0.0359	-3.26372
0.75638	-0.00231	-0.20979	0.76032	-0.00443	-0.40244	0.75638	-0.00864	-0.78569	0.75638	-0.01985	-1.80414	0.78835	-0.03592	-3.26538
0.75623	-0.00229	-0.2083	0.76035	-0.00463	-0.42123	0.75623	-0.00855	-0.77709	0.75623	-0.01982	-1.8022	0.78799	-0.03569	-3.24485
0.75607	-0.00224	-0.20366	0.76002	-0.00444	-0.4033	0.75607	-0.00836	-0.75989	0.75607	-0.01961	-1.78306	0.78801	-0.03588	-3.26177
0.75592	-0.00233	-0.21182	0.75967	-0.00421	-0.38305	0.75592	-0.0087	-0.79124	0.75592	-0.0194	-1.76392	0.7878	-0.03582	-3.25623
0.75577	-0.00219	-0.19911	0.75966	-0.00437	-0.39706	0.75577	-0.00837	-0.76072	0.75577	-0.01944	-1.76697	0.7878	-0.036	-3.27232
0.75562	-0.00237	-0.21557	0.75971	-0.0046	-0.41779	0.75562	-0.00857	-0.77875	0.75562	-0.01958	-1.78001	0.7877	-0.03605	-3.27703
0.75546	-0.00214	-0.1949	0.75946	-0.00449	-0.40816	0.75546	-0.00866	-0.78708	0.75546	-0.01978	-1.79776	0.78764	-0.03615	-3.28647
0.75531	-0.0024	-0.21842	0.75909	-0.00424	-0.38591	0.75531	-0.00834	-0.75795	0.75531	-0.01983	-1.80276	0.78754	-0.03621	-3.29174
0.75516	-0.00211	-0.19143	0.75898	-0.00429	-0.38996	0.75516	-0.00876	-0.79595	0.75516	-0.0197	-1.7911	0.7874	-0.03623	-3.29368
0.755	-0.00243	-0.22053	0.75908	-0.00458	-0.41637	0.755	-0.00846	-0.76877	0.755	-0.01959	-1.78056	0.78735	-0.03635	-3.30422
0.75485	-0.0021	-0.19107	0.75892	-0.00458	-0.41593	0.75485	-0.00844	-0.76682	0.75485	-0.0195	-1.77252	0.78711	-0.03625	-3.29507
0.7547	-0.00243	-0.22095	0.7585	-0.00427	-0.38788	0.7547	-0.00873	-0.79373	0.7547	-0.0195	-1.77252	0.78689	-0.03616	-3.28758
0.75455	-0.0021	-0.1911	0.75832	-0.00424	-0.38519	0.75455	-0.00831	-0.75517	0.75455	-0.01977	-1.79721	0.78661	-0.03602	-3.27481
0.75439	-0.00243	-0.22078	0.75842	-0.00452	-0.41102	0.75439	-0.00862	-0.78375	0.75439	-0.01999	-1.81746	0.78646	-0.03603	-3.27537
0.75424	-0.00212	-0.19234	0.75832	-0.00458	-0.4167	0.75424	-0.00859	-0.78097	0.75424	-0.01987	-1.80664	0.78605	-0.03574	-3.24929
0.75409	-0.00239	-0.21717	0.75794	-0.00433	-0.39354	0.75409	-0.00833	-0.75711	0.75409	-0.01968	-1.78888	0.7861	-0.03596	-3.26926
0.75394	-0.00217	-0.19706	0.75768	-0.00421	-0.38283	0.75394	-0.00875	-0.79512	0.75394	-0.0195	-1.77307	0.78592	-0.03593	-3.26649
0.75378	-0.00235	-0.21365	0.75773	-0.00444	-0.40339	0.75378	-0.00843	-0.76627	0.75378	-0.01944	-1.76752	0.78586	-0.03604	-3.27648
0.75363	-0.0022	-0.19981	0.75774	-0.00461	-0.41948	0.75363	-0.00848	-0.77126	0.75363	-0.01961	-1.78278	0.78577	-0.03611	-3.2823
0.75348	-0.00231	-0.21018	0.75741	-0.00442	-0.40175	0.75348	-0.00871	-0.79152	0.75348	-0.01976	-1.79665	0.78575	-0.03625	-3.2959
0.75333	-0.00225	-0.20452	0.75707	-0.00421	-0.38255	0.75333	-0.00834	-0.7585	0.75333	-0.01983	-1.80303	0.78566	-0.03633	-3.30228
0.75317	-0.00224	-0.20405	0.75708	-0.00439	-0.39875	0.75317	-0.00866	-0.78708	0.75317	-0.01978	-1.79804	0.78549	-0.03631	-3.30089
0.75302	-0.00231	-0.21016	0.75713	-0.00461	-0.41926	0.75302	-0.00854	-0.77626	0.75302	-0.01958	-1.77973	0.78544	-0.03643	-3.31143
0.75287	-0.00219	-0.19936	0.75685	-0.00447	-0.40672	0.75287	-0.00838	-0.76211	0.75287	-0.01951	-1.77363	0.78521	-0.03634	-3.30339
0.75272	-0.00236	-0.21434	0.75648	-0.00423	-0.38491	0.75272	-0.00872	-0.79262	0.75272	-0.0195	-1.77279	0.78497	-0.03624	-3.29451
0.75256	-0.00215	-0.19567	0.75641	-0.00432	-0.3929	0.75256	-0.00835	-0.75933	0.75256	-0.01974	-1.79471	0.78474	-0.03616	-3.28702
0.75241	-0.00239	-0.2177	0.75649	-0.00458	-0.4164	0.75241	-0.0086	-0.78153	0.75241	-0.01999	-1.81718	0.78459	-0.03615	-3.28647
0.75226	-0.00212	-0.1929	0.75632	-0.00456	-0.41437	0.75226	-0.00865	-0.78652	0.75226	-0.01987	-1.80664	0.78419	-0.03588	-3.26205
0.75211	-0.00243	-0.22053	0.7559	-0.00427	-0.38777	0.75211	-0.00835	-0.75906	0.75211	-0.01975	-1.79554	0.78419	-0.03605	-3.27759
0.75195	-0.00211	-0.19151	0.75574	-0.00425	-0.38638	0.75195	-0.00878	-0.79845	0.75195	-0.01954	-1.77668	0.78405	-0.03606	-3.27814
0.7518	-0.00243	-0.22109	0.75584	-0.00454	-0.41271	0.7518	-0.00847	-0.76988	0.7518	-0.01948	-1.77113	0.78392	-0.03609	-3.28092
0.75165	-0.00211	-0.19171	0.75572	-0.00457	-0.41582	0.75165	-0.00846	-0.76877	0.75165	-0.01966	-1.78722	0.78384	-0.03617	-3.28813
0.7515	-0.00243	-0.22095	0.75533	-0.00431	-0.39185	0.7515	-0.00876	-0.79623	0.7515	-0.01977	-1.79749	0.78387	-0.03638	-3.30727
0.75134	-0.00211	-0.19221	0.75511	-0.00423	-0.38488	0.75134	-0.00833	-0.75684	0.75134	-0.01986	-1.80553	0.78375	-0.03642	-3.3106
0.75119	-0.00242	-0.21978	0.75517	-0.00447	-0.40674	0.75119	-0.00865	-0.78624	0.75119	-0.01985	-1.8047	0.78363	-0.03645	-3.31338
0.75104	-0.00215	-0.19567	0.75514	-0.00461	-0.41951	0.75104	-0.00861	-0.78264	0.75104	-0.01959	-1.78084	0.78349	-0.03646	-3.31449
0.75089	-0.00237	-0.21512	0.7548	-0.0044	-0.39956	0.75089	-0.00836	-0.75961	0.75089	-0.01944	-1.76725	0.78337	-0.0365	-3.31809
0.75073	-0.00219	-0.19936	0.75448	-0.00421	-0.38239	0.75073	-0.00876	-0.79595	0.75073	-0.01949	-1.77224	0.78305	-0.03632	-3.30145
0.75058	-0.00233	-0.21215	0.7545	-0.00441	-0.40058	0.75058	-0.00845	-0.76793	0.75058	-0.01972	-1.79277	0.78285	-0.03626	-3.29618
0.75043	-0.00224	-0.20366	0.75454	-0.00462	-0.42012	0.75043	-0.00853	-0.77515	0.75043	-0.01992	-1.81052	0.78268	-0.03623	-3.29396
0.75027	-0.00227	-0.20655	0.75423	-0.00445	-0.4045	0.75027	-0.00872	-0.79235	0.75027	-0.01995	-1.8133	0.78237	-0.03606	-3.27814
0.75012	-0.00231	-0.20971	0.75389	-0.00423	-0.38452	0.75012	-0.00838	-0.76183	0.75012	-0.01979	-1.79915	0.78228	-0.03613	-3.2848
0.74997	-0.00222	-0.20139	0.75384	-0.00435	-0.39526	0.74997	-0.0087	-0.79096	0.74997	-0.01963	-1.78417	0.78212	-0.03612	-3.28397
0.74982	-0.00235	-0.21362	0.75391	-0.0046	-0.41798	0.74982	-0.00854	-0.77626	0.74982	-0.01958	-1.78001	0.782	-0.03616	-3.28758
0.74966	-0.00219	-0.19884	0.7537	-0.00453	-0.41213	0.74966	-0.00842	-0.76571	0.74966	-0.01967	-1.78861	0.78191	-0.03624	-3.29423
0.74951	-0.00239	-0.21767	0.7533	-0.00426	-0.38716	0.74951	-0.00875	-0.7954	0.74951	-0.01983	-1.80248	0.78196	-0.03645	-3.31393
0.74936	-0.00214	-0.19437	0.75316	-0.00427	-0.38777	0.74936	-0.00834	-0.7585	0.74936	-0.0199	-1.80941	0.78181	-0.03646	-3.31449
0.74921	-0.00242	-0.22025	0.75327	-0.00457	-0.41518	0.74921	-0.00862	-0.78402	0.74921	-0.01992	-1.8108	0.78181	-0.03663	-3.33002
0.74905	-0.00211	-0.19182	0.75313	-0.00458	-0.41645	0.74905	-0.00866	-0.78735	0.74905	-0.0197	-1.79055	0.78155	-0.03652	-3.31976
0.7489	-0.00244	-0.2215	0.75273	-0.00431	-0.39146	0.7489	-0.00836	-0.76044	0.7489	-0.01943	-1.76614	0.78145	-0.03657	-3.32475
0.74875	-0.00211	-0.19212	0.75254	-0.00426	-0.38707	0.74875	-0.0088	-0.79984	0.74875	-0.01957	-1.77945	0.78113	-0.03638	-3.30755
0.7486	-0.00244	-0.2217	0.75262	-0.00452	-0.41107	0.7486	-0.00849	-0.77182	0.7486	-0.01974	-1.79471	0.78096	-0.03637	-3.30616
0.74844	-0.00211	-0.19218	0.75255	-0.00462	-0.41959	0.74844	-0.0085	-0.77237	0.74844	-0.01993	-1.81163	0.78076	-0.03631	-3.30089
0.74829	-0.00243	-0.22086	0.7522	-0.00439	-0.399	0.74829	-0.00878	-0.79817	0.74829	-0.02002	-1.81968	0.78054	-0.03623	-3.29368
0.74814	-0.00214	-0.19454	0.7519	-0.00422	-0.38374	0.74814	-0.00835	-0.75933	0.74814	-0.01984	-1.80359	0.78037	-0.03622	-3.29257
0.74799	-0.00239	-0.21692	0.75193	-0.00443	-0.4025	0.74799	-0.00868	-0.78874	0.74799	-0.01971	-1.79194	0.78015	-0.03614	-3.28536
0.74783	-0.00219	-0.19947	0.75197	-0.00464	-0.42214	0.74783	-0.00861	-0.78264	0.74783	-0.01963	-1.78445	0.78008	-0.03624	-3.29423
0.74768	-0.00235	-0.21384	0.75165	-0.00446	-0.40513	0.74768	-0.00839	-0.76294	0.74768	-0.01968	-1.78944	0.78	-0.03632	-3.30172
0.74753	-0.00224	-0.20325	0.7513	-0.00424	-0.3851	0.74753	-0.00876	-0.79679	0.74753	-0.01992	-1.8108	0.78002	-0.03651	-3.31893
0.74738	-0.00231	-0.20966	0.75128	-0.00439	-0.39898	0.74738	-0.00847	-0.77043	0.74738	-0.02002	-1.82023	0.77987	-0.03651	-3.31893
0.74722	-0.00229	-0.20863	0.75133	-0.00462	-0.41981	0.74722	-0.00858	-0.78014	0.74722	-0.02001	-1.81885	0.77995	-0.03677	-3.34251
0.74707	-0.00225	-0.2048	0.7511	-0.00452	-0.41127	0.74707	-0.00875	-0.7954	0.74707	-0.0198	-1.79998	0.77961	-0.03656	-3.32392
0.74692	-0.00234	-0.21276	0.75071	-0.00426	-0.38732	0.74692	-0.0084	-0.76377	0.74692	-0.01957	-1.7789	0.77953	-0.03664	-3.33085
0.74677	-0.00219	-0.19945	0.75059	-0.0043	-0.39096	0.74677	-0.00876	-0.79595	0.74677	-0.01961	-1.78306	0.77925	-0.0365	-3.31809
0.74661	-0.00238	-0.21656	0.7507	-0.00459	-0.41712	0.74661	-0.00854	-0.77653	0.74661	-0.01974	-1.79443	0.77905	-0.03644	-3.3131
0.74646	-0.00216	-0.19639	0.75055	-0.0046	-0.41806	0.74646	-0.00847	-0.77015	0.74646	-0.01995	-1.81385	0.77879	-0.03633	-3.30283
0.74631	-0.00242	-0.22025	0.75013	-0.0043	-0.39054	0.74631	-0.00878	-0.79845	0.74631	-0.02001	-1.81885	0.7786	-0.03628	-3.29812
0.74615	-0.00213	-0.19373	0.74995	-0.00427	-0.3881	0.74615	-0.00836	-0.76044	0.74615	-0.01988	-1.80747	0.77846	-0.0363	-3.29978
0.746	-0.00245	-0.22292	0.75004	-0.00454	-0.41271	0.746	-0.00866	-0.78708	0.746	-0.01975	-1.79582	0.77821	-0.03619	-3.28979
0.74585	-0.00212	-0.1924	0.74995	-0.00461	-0.41901	0.74585	-0.00869	-0.78957	0.74585	-0.01968	-1.78888	0.77816	-0.0363	-3.30034
0.7457	-0.00245	-0.22272	0.74959	-0.00437	-0.39717	0.7457	-0.00838	-0.76183	0.7457	-0.01968	-1.78944	0.77809	-0.0364	-3.30894
0.74554	-0.00212	-0.19301	0.74931	-0.00423	-0.3848	0.74554	-0.00883	-0.80261	0.74554	-0.01995	-1.8133	0.77807	-0.03654	-3.32225
0.74539	-0.00244	-0.22189	0.74936	-0.00445	-0.40489	0.74539	-0.0085	-0.77293	0.74539	-0.02016	-1.83272	0.77792	-0.03655	-3.32309
0.74524	-0.00214	-0.19429	0.74938	-0.00465	-0.42253	0.74524	-0.00853	-0.77542	0.74524	-0.02006	-1.82356	0.77803	-0.03684	-3.34917
0.74509	-0.00241	-0.21928	0.74905	-0.00445	-0.40439	0.74509	-0.0088	-0.79984	0.74509	-0.01987	-1.80609	0.7777	-0.03664	-3.33113
0.74493	-0.00219	-0.19911	0.7487	-0.00423	-0.38469	0.74493	-0.00839	-0.76266	0.74493	-0.01968	-1.78916	0.77758	-0.03668	-3.33474
0.74478	-0.00238	-0.21595	0.7487	-0.00441	-0.4005	0.74478	-0.00871	-0.79152	0.74478	-0.01962	-1.78334	0.77737	-0.03662	-3.32891
0.74463	-0.00223	-0.20228	0.74875	-0.00464	-0.42145	0.74463	-0.00864	-0.78541	0.74463	-0.01979	-1.79915	0.77715	-0.03654	-3.32225
0.74448	-0.00231	-0.21002	0.74846	-0.00448	-0.40719	0.74448	-0.0084	-0.76322	0.74448	-0.01992	-1.8108	0.77684	-0.03636	-3.30561
0.74432	-0.00225	-0.20444	0.7481	-0.00424	-0.38591	0.74432	-0.00876	-0.79623	0.74432	-0.01999	-1.81691	0.77665	-0.03632	-3.302
0.74417	-0.00225	-0.2045	0.74802	-0.00432	-0.39284	0.74417	-0.00844	-0.76738	0.74417	-0.01993	-1.81191	0.77651	-0.03633	-3.30283
0.74402	-0.00231	-0.21024	0.7481	-0.00459	-0.4174	0.74402	-0.00859	-0.78097	0.74402	-0.01974	-1.79443	0.7763	-0.03627	-3.29756
0.74387	-0.00221	-0.20097	0.74794	-0.00458	-0.41629	0.74387	-0.00872	-0.79318	0.74387	-0.01966	-1.7875	0.7762	-0.03633	-3.30283
0.74371	-0.00237	-0.2157	0.74751	-0.00427	-0.38829	0.74371	-0.0084	-0.76377	0.74371	-0.01966	-1.78694	0.77617	-0.03647	-3.31532
0.74356	-0.00217	-0.19753	0.74736	-0.00427	-0.38816	0.74356	-0.00879	-0.79873	0.74356	-0.01991	-1.80969	0.77609	-0.03655	-3.32281
0.74341	-0.00241	-0.21895	0.74746	-0.00456	-0.41435	0.74341	-0.00853	-0.7757	0.74341	-0.02016	-1.833	0.77596	-0.03658	-3.32531
0.74326	-0.00215	-0.19512	0.74735	-0.0046	-0.41801	0.74326	-0.00849	-0.77154	0.74326	-0.02004	-1.8219	0.77602	-0.03681	-3.34667
0.7431	-0.00245	-0.22236	0.74696	-0.00433	-0.39379	0.7431	-0.0088	-0.79984	0.7431	-0.01991	-1.81025	0.77576	-0.03669	-3.33557
0.74295	-0.00212	-0.19243	0.74674	-0.00426	-0.38688	0.74295	-0.00836	-0.76017	0.74295	-0.01971	-1.79221	0.77561	-0.0367	-3.33613
0.7428	-0.00246	-0.22336	0.7468	-0.0045	-0.40877	0.7428	-0.00868	-0.7893	0.7428	-0.01966	-1.7875	0.77546	-0.0367	-3.33613
0.74265	-0.00212	-0.19312	0.74678	-0.00465	-0.42234	0.74265	-0.00868	-0.78902	0.74265	-0.01982	-1.8022	0.77524	-0.03662	-3.32919
0.74249	-0.00246	-0.22339	0.74644	-0.00443	-0.40278	0.74249	-0.00839	-0.76294	0.74249	-0.01994	-1.81274	0.77491	-0.03643	-3.31143
0.74234	-0.00213	-0.19398	0.7461	-0.00423	-0.38455	0.74234	-0.00883	-0.80317	0.74234	-0.02003	-1.82079	0.77474	-0.03641	-3.30977
0.74219	-0.00244	-0.22197	0.74613	-0.00443	-0.40311	0.74219	-0.00851	-0.7732	0.74219	-0.02002	-1.81968	0.77454	-0.03635	-3.3045
0.74203	-0.00214	-0.19454	0.74615	-0.00462	-0.41984	0.74203	-0.00852	-0.77459	0.74203	-0.01973	-1.7936	0.77439	-0.03636	-3.30505
0.74188	-0.00236	-0.21476	0.74585	-0.00446	-0.40563	0.74188	-0.00877	-0.79734	0.74188	-0.01958	-1.78028	0.77423	-0.03634	-3.30367
0.74173	-0.00219	-0.19914	0.7455	-0.00424	-0.38519	0.74173	-0.00839	-0.76238	0.74173	-0.01966	-1.78694	0.77424	-0.03652	-3.32031
0.74158	-0.00234	-0.21249	0.74546	-0.00436	-0.39628	0.74158	-0.00869	-0.79041	0.74158	-0.01986	-1.80553	0.77413	-0.03658	-3.32558
0.74142	-0.00224	-0.20352	0.74552	-0.0046	-0.41842	0.74142	-0.0086	-0.78208	0.74142	-0.02005	-1.82273	0.77403	-0.03663	-3.3303
0.74127	-0.00229	-0.20841	0.74533	-0.00456	-0.41435	0.74127	-0.00842	-0.76516	0.74127	-0.02009	-1.82634	0.77401	-0.03679	-3.34417
0.74112	-0.0023	-0.20905	0.74492	-0.00427	-0.38857	0.74112	-0.00877	-0.79706	0.74112	-0.01994	-1.81274	0.77383	-0.03675	-3.34084
0.74097	-0.00224	-0.20364	0.74478	-0.00428	-0.38904	0.74097	-0.00844	-0.76766	0.74097	-0.01977	-1.79721	0.77373	-0.03681	-3.34611
0.74081	-0.00236	-0.21451	0.74489	-0.00458	-0.41681	0.74081	-0.00864	-0.78541	0.74081	-0.01971	-1.79194	0.77352	-0.03675	-3.34084
0.74066	-0.0022	-0.20003	0.74476	-0.0046	-0.41826	0.74066	-0.00873	-0.79373	0.74066	-0.01981	-1.80081	0.77332	-0.03669	-3.33585
0.74051	-0.0024	-0.21853	0.74436	-0.00433	-0.39359	0.74051	-0.00842	-0.76544	0.74051	-0.01998	-1.81607	0.77299	-0.03649	-3.31726
0.74036	-0.00216	-0.19651	0.74417	-0.00428	-0.38915	0.74036	-0.00883	-0.80317	0.74036	-0.02005	-1.82245	0.77284	-0.0365	-3.31837
0.7402	-0.00244	-0.22184	0.74423	-0.00453	-0.41168	0.7402	-0.00855	-0.77709	0.7402	-0.02006	-1.82384	0.77252	-0.03631	-3.30117
0.74005	-0.00213	-0.19354	0.74418	-0.00464	-0.42203	0.74005	-0.00852	-0.77459	0.74005	-0.01982	-1.8022	0.77251	-0.03647	-3.31587
0.7399	-0.00246	-0.22333	0.74383	-0.00442	-0.40142	0.7399	-0.00882	-0.80206	0.7399	-0.01957	-1.77945	0.77232	-0.03643	-3.31199
0.73975	-0.00214	-0.19429	0.74352	-0.00424	-0.38577	0.73975	-0.00839	-0.76266	0.73975	-0.01972	-1.79305	0.77233	-0.03661	-3.32808
0.73959	-0.00246	-0.22322	0.74356	-0.00445	-0.40483	0.73959	-0.00871	-0.79179	0.73959	-0.01989	-1.80831	0.77221	-0.03665	-3.33169
0.73944	-0.00213	-0.19384	0.74359	-0.00466	-0.42408	0.73944	-0.00869	-0.78957	0.73944	-0.02008	-1.82551	0.77214	-0.03674	-3.33973
0.73929	-0.00245	-0.22267	0.74328	-0.00448	-0.40771	0.73929	-0.00842	-0.76516	0.73929	-0.02017	-1.83355	0.77207	-0.03683	-3.34806
0.73914	-0.00216	-0.19614	0.74293	-0.00426	-0.3876	0.73914	-0.00885	-0.80455	0.73914	-0.02	-1.81802	0.77191	-0.03683	-3.34806
0.73898	-0.00242	-0.21981	0.7429	-0.0044	-0.4	0.73898	-0.00852	-0.77431	0.73898	-0.01988	-1.80692	0.77187	-0.03695	-3.35888
0.73883	-0.00221	-0.20094	0.74296	-0.00464	-0.42164	0.73883	-0.00858	-0.78014	0.73883	-0.01978	-1.7986	0.77162	-0.03685	-3.34972
0.73868	-0.00238	-0.21662	0.74273	-0.00455	-0.41404	0.73868	-0.00881	-0.80095	0.73868	-0.01982	-1.80137	0.77142	-0.03679	-3.34417
0.73853	-0.00224	-0.204	0.74235	-0.00429	-0.39026	0.73853	-0.00845	-0.76849	0.73853	-0.02007	-1.82495	0.77111	-0.03661	-3.32864
0.73837	-0.00234	-0.21287	0.74222	-0.00432	-0.39251	0.73837	-0.00875	-0.7954	0.73837	-0.02016	-1.833	0.77096	-0.03661	-3.32864
0.73822	-0.0023	-0.20871	0.74233	-0.00462	-0.41992	0.73822	-0.00864	-0.78569	0.73822	-0.02016	-1.83272	0.77057	-0.03635	-3.30478
0.73807	-0.00227	-0.20666	0.74219	-0.00464	-0.42136	0.73807	-0.00848	-0.77126	0.73807	-0.01994	-1.81274	0.77063	-0.03658	-3.32586
0.73792	-0.00235	-0.21407	0.74179	-0.00435	-0.39531	0.73792	-0.00883	-0.80261	0.73792	-0.01972	-1.79305	0.77044	-0.03654	-3.32225
0.73776	-0.00223	-0.20269	0.7416	-0.00431	-0.39168	0.73776	-0.00845	-0.76849	0.73776	-0.01978	-1.79804	0.77038	-0.03665	-3.33196
0.73761	-0.0024	-0.21837	0.74168	-0.00457	-0.41559	0.73761	-0.0087	-0.79124	0.73761	-0.01991	-1.81025	0.77031	-0.03674	-3.34001
0.73746	-0.00219	-0.19925	0.7416	-0.00465	-0.42283	0.73746	-0.00876	-0.79679	0.73746	-0.02012	-1.82911	0.77026	-0.03686	-3.35111
0.7373	-0.00244	-0.22206	0.74124	-0.00442	-0.40156	0.7373	-0.00846	-0.76904	0.7373	-0.02017	-1.83355	0.77017	-0.03693	-3.35721
0.73715	-0.00216	-0.19623	0.74095	-0.00427	-0.38838	0.73715	-0.00888	-0.80761	0.73715	-0.02003	-1.82134	0.77002	-0.03693	-3.35693
0.737	-0.00246	-0.22389	0.74099	-0.00449	-0.40802	0.737	-0.00858	-0.77959	0.737	-0.01992	-1.8108	0.76996	-0.03704	-3.3672
0.73685	-0.00214	-0.19442	0.74101	-0.00468	-0.42525	0.73685	-0.00856	-0.77848	0.73685	-0.01984	-1.80359	0.76973	-0.03694	-3.3586
0.73669	-0.00247	-0.22469	0.74069	-0.00448	-0.40763	0.73669	-0.00886	-0.80539	0.73669	-0.01984	-1.80331	0.76949	-0.03685	-3.35
0.73654	-0.00215	-0.19506	0.74034	-0.00427	-0.38785	0.73654	-0.00843	-0.76655	0.73654	-0.02011	-1.82828	0.76925	-0.03675	-3.34057
0.73639	-0.00247	-0.22478	0.74034	-0.00443	-0.40316	0.73639	-0.00875	-0.7954	0.73639	-0.02032	-1.84742	0.76909	-0.03674	-3.34029
0.73624	-0.00215	-0.19584	0.74039	-0.00466	-0.42389	0.73624	-0.00871	-0.79152	0.73624	-0.02021	-1.83744	0.7687	-0.03648	-3.31615
0.73608	-0.00245	-0.22256	0.74014	-0.00455	-0.41393	0.73608	-0.00846	-0.76932	0.73608	-0.02002	-1.82023	0.76872	-0.03667	-3.33363
0.73593	-0.00219	-0.19947	0.73976	-0.0043	-0.39087	0.73593	-0.00886	-0.80566	0.73593	-0.01985	-1.80442	0.76857	-0.03667	-3.33363
0.73578	-0.00241	-0.2187	0.73966	-0.00436	-0.39673	0.73578	-0.00856	-0.77792	0.73578	-0.01978	-1.79832	0.76845	-0.03671	-3.33724
0.73563	-0.00224	-0.20344	0.73976	-0.00464	-0.42195	0.73563	-0.00862	-0.78375	0.73563	-0.01995	-1.81358	0.76838	-0.0368	-3.34528
0.73547	-0.00237	-0.21545	0.7396	-0.00464	-0.42153	0.73547	-0.00883	-0.80317	0.73547	-0.0201	-1.82773	0.76839	-0.03699	-3.36248
0.73532	-0.00228	-0.20685	0.73918	-0.00433	-0.39398	0.73532	-0.00849	-0.77182	0.73532	-0.02018	-1.83411	0.76828	-0.03703	-3.36609
0.73517	-0.00231	-0.20999	0.73901	-0.00432	-0.39237	0.73517	-0.00881	-0.80095	0.73517	-0.02012	-1.82911	0.76814	-0.03705	-3.36803
[truncated: 11,108 more rows]

## Sheet: CV data- macroporous
Potential	Compensated Potential	Current	Current density	Potential	Compensated Potential	Current	Current density	Potential	Compensated Potential	Current	Current density	Potential	Compensated Potential	Current	Current density	Potential	Compensated Potential	Current	Current density
V	V	A	A/g	V	V	A	A/g	V	V	A	A/g	V	V	A	A/g	V	V	A	A/g
vs RHE	vs RHE	5mV/s	5mV/s	vs RHE	vs RHE	10mV/s	10mV/s	vs RHE	vs RHE	20mV/s	20mV/s	vs RHE	vs RHE	50mV/s	50 mV/s	vs RHE	vs RHE	100mV/s	PSonly100 mV/s
1.03989	1.03636	0.00396	0.32974	1.03989	1.03544	0.005	0.41631	1.03989	1.03495	0.00555	0.4626	1.03989	1.03425	0.00634	0.52795	1.03989	1.03282	0.00794	0.66172
1.03973	1.03625	0.00391	0.32618	1.03973	1.03544	0.00483	0.40232	1.03973	1.03487	0.00546	0.45522	1.03973	1.03423	0.00618	0.51498	1.03973	1.03272	0.00788	0.65638
1.03958	1.03612	0.00389	0.32433	1.03958	1.03544	0.00465	0.38757	1.03958	1.03486	0.00531	0.4425	1.03958	1.03413	0.00612	0.51015	1.03958	1.03273	0.00769	0.64112
1.03943	1.03591	0.00396	0.32959	1.03943	1.03518	0.00478	0.3981	1.03943	1.03448	0.00556	0.4631	1.03943	1.03394	0.00616	0.51346	1.03943	1.03256	0.00771	0.6429
1.03928	1.03585	0.00385	0.32077	1.03928	1.03486	0.00496	0.41326	1.03928	1.03455	0.00531	0.44225	1.03928	1.03368	0.00628	0.52363	1.03928	1.0325	0.00761	0.634
1.03912	1.03558	0.00398	0.33178	1.03912	1.03481	0.00484	0.40349	1.03912	1.03429	0.00543	0.45242	1.03912	1.03352	0.00629	0.52439	1.03912	1.03234	0.00762	0.63502
1.03897	1.03559	0.0038	0.31685	1.03897	1.03483	0.00465	0.38752	1.03897	1.03408	0.00549	0.45776	1.03897	1.03339	0.00627	0.5221	1.03897	1.0322	0.00761	0.634
1.03882	1.03526	0.004	0.33338	1.03882	1.03463	0.0047	0.3919	1.03882	1.03415	0.00525	0.43742	1.03882	1.03342	0.00606	0.50507	1.03882	1.03194	0.00773	0.64418
1.03867	1.03531	0.00377	0.31418	1.03867	1.0343	0.0049	0.40853	1.03867	1.03374	0.00553	0.46107	1.03867	1.03345	0.00586	0.48828	1.03867	1.03183	0.00768	0.63985
1.03851	1.03494	0.00402	0.33473	1.03851	1.03416	0.00489	0.40716	1.03851	1.03379	0.0053	0.442	1.03851	1.03323	0.00594	0.49489	1.03851	1.03161	0.00776	0.64672
1.03836	1.03502	0.00375	0.3124	1.03836	1.03423	0.00464	0.38704	1.03836	1.03366	0.00528	0.44022	1.03836	1.03299	0.00604	0.50303	1.03836	1.0316	0.0076	0.63299
1.03821	1.03464	0.00401	0.33394	1.03821	1.0341	0.00462	0.38467	1.03821	1.03333	0.00548	0.457	1.03821	1.03272	0.00617	0.51397	1.03821	1.03146	0.00758	0.63197
1.03806	1.03472	0.00375	0.31219	1.03806	1.03375	0.00484	0.40326	1.03806	1.03348	0.00514	0.42852	1.03806	1.03255	0.00618	0.51524	1.03806	1.03148	0.00739	0.61595
1.0379	1.03435	0.00399	0.33269	1.0379	1.03356	0.00488	0.40639	1.0379	1.0331	0.00539	0.44937	1.0379	1.03255	0.00601	0.501	1.0379	1.03139	0.00732	0.60959
1.03775	1.03442	0.00375	0.31227	1.03775	1.03359	0.00467	0.38915	1.03775	1.03298	0.00536	0.44683	1.03775	1.03249	0.00591	0.49286	1.03775	1.03132	0.00723	0.60221
1.0376	1.03407	0.00396	0.32997	1.0376	1.03351	0.00459	0.38239	1.0376	1.03302	0.00514	0.42826	1.0376	1.03239	0.00585	0.48726	1.0376	1.03127	0.00711	0.59255
1.03745	1.03406	0.0038	0.31672	1.03745	1.03318	0.00479	0.39914	1.03745	1.03255	0.0055	0.45827	1.03745	1.03221	0.00588	0.48981	1.03745	1.0311	0.00713	0.59433
1.03729	1.0338	0.00392	0.32702	1.03729	1.03293	0.0049	0.40817	1.03729	1.03264	0.00522	0.43538	1.03729	1.0319	0.00605	0.50456	1.03729	1.03107	0.00699	0.58289
1.03714	1.03375	0.00381	0.31764	1.03714	1.03292	0.00474	0.39474	1.03714	1.03246	0.00526	0.43844	1.03714	1.03168	0.00613	0.51117	1.03714	1.03087	0.00705	0.58746
1.03699	1.03353	0.00388	0.32346	1.03699	1.03293	0.00456	0.37982	1.03699	1.03215	0.00544	0.45293	1.03699	1.03161	0.00604	0.50354	1.03699	1.03071	0.00706	0.58797
1.03683	1.03342	0.00384	0.31995	1.03683	1.03266	0.00469	0.39057	1.03683	1.03229	0.0051	0.42521	1.03683	1.03162	0.00586	0.48854	1.03683	1.03046	0.00716	0.59662
1.03668	1.03329	0.00381	0.31776	1.03668	1.03235	0.00486	0.40525	1.03668	1.03192	0.00535	0.44556	1.03668	1.03162	0.00569	0.47404	1.03668	1.03036	0.0071	0.59179
1.03653	1.03307	0.00388	0.32351	1.03653	1.03231	0.00474	0.39497	1.03653	1.03185	0.00526	0.43844	1.03653	1.03149	0.00566	0.4715	1.03653	1.03007	0.00725	0.6045
1.03638	1.03302	0.00377	0.31405	1.03638	1.03233	0.00455	0.3791	1.03638	1.03183	0.00511	0.42547	1.03638	1.03125	0.00576	0.47989	1.03638	1.03011	0.00705	0.58721
1.03622	1.03275	0.00391	0.32555	1.03622	1.03212	0.00461	0.38445	1.03622	1.03145	0.00536	0.44657	1.03622	1.031	0.00587	0.4893	1.03622	1.02996	0.00704	0.5867
1.03607	1.03276	0.00372	0.31034	1.03607	1.0318	0.0048	0.40021	1.03607	1.03152	0.00511	0.42623	1.03607	1.03084	0.00588	0.49006	1.03607	1.02993	0.0069	0.57475
1.03592	1.03242	0.00393	0.32743	1.03592	1.03167	0.00478	0.39808	1.03592	1.03128	0.00521	0.43437	1.03592	1.03077	0.00579	0.48243	1.03592	1.02986	0.00681	0.56763
1.03577	1.03248	0.00369	0.30764	1.03577	1.03172	0.00454	0.37875	1.03577	1.03105	0.0053	0.44174	1.03577	1.03075	0.00564	0.46997	1.03577	1.02982	0.00668	0.55695
1.03561	1.03211	0.00394	0.32852	1.03561	1.03159	0.00452	0.37651	1.03561	1.03112	0.00505	0.42089	1.03561	1.03065	0.00558	0.46488	1.03561	1.02974	0.00659	0.54957
1.03546	1.03219	0.00367	0.30614	1.03546	1.03123	0.00476	0.39647	1.03546	1.03072	0.00532	0.44352	1.03546	1.03051	0.00556	0.46336	1.03546	1.0296	0.00659	0.54881
1.03531	1.03181	0.00393	0.32753	1.03531	1.03105	0.00478	0.39864	1.03531	1.03076	0.00511	0.42597	1.03531	1.03021	0.00573	0.4776	1.03531	1.02956	0.00646	0.53838
1.03516	1.03189	0.00367	0.30602	1.03516	1.03109	0.00457	0.38053	1.03516	1.03064	0.00508	0.42318	1.03516	1.02992	0.00588	0.49006	1.03516	1.02938	0.00649	0.54118
1.035	1.03151	0.00392	0.32672	1.035	1.031	0.0045	0.37481	1.035	1.0303	0.00529	0.44072	1.035	1.02988	0.00576	0.47963	1.035	1.02917	0.00656	0.54626
1.03485	1.03158	0.00368	0.3067	1.03485	1.03069	0.00467	0.38946	1.03485	1.03045	0.00495	0.4125	1.03485	1.02985	0.00562	0.4687	1.03485	1.02897	0.0066	0.55033
1.0347	1.03124	0.00389	0.32387	1.0347	1.03044	0.00479	0.39912	1.0347	1.03008	0.00519	0.43284	1.0347	1.02985	0.00545	0.4542	1.0347	1.02886	0.00656	0.54677
1.03455	1.03124	0.00371	0.30922	1.03455	1.03044	0.00462	0.38467	1.03455	1.02993	0.00518	0.43182	1.03455	1.02974	0.0054	0.44963	1.03455	1.02856	0.00673	0.56076
1.03439	1.03098	0.00384	0.32003	1.03439	1.03043	0.00445	0.37099	1.03439	1.02998	0.00496	0.413	1.03439	1.02947	0.00553	0.46082	1.03439	1.02858	0.00653	0.54448
1.03424	1.03092	0.00374	0.31138	1.03424	1.03016	0.00459	0.38241	1.03424	1.02954	0.00529	0.44047	1.03424	1.02927	0.00558	0.46539	1.03424	1.02844	0.00652	0.54347
1.03409	1.0307	0.0038	0.31687	1.03409	1.02985	0.00476	0.39701	1.03409	1.02962	0.00502	0.41835	1.03409	1.02909	0.00562	0.46819	1.03409	1.02836	0.00644	0.5366
1.03394	1.03058	0.00377	0.31415	1.03394	1.02981	0.00463	0.38623	1.03394	1.02945	0.00504	0.42038	1.03394	1.02897	0.00558	0.46514	1.03394	1.02829	0.00634	0.52872
1.03378	1.03046	0.00374	0.31153	1.03378	1.02983	0.00445	0.37056	1.03378	1.02913	0.00523	0.43589	1.03378	1.02901	0.00536	0.44683	1.03378	1.02828	0.00618	0.51498
1.03363	1.03024	0.00381	0.31784	1.03363	1.02961	0.00452	0.37689	1.03363	1.02928	0.00489	0.40764	1.03363	1.02896	0.00525	0.43767	1.03363	1.02819	0.00611	0.50939
1.03348	1.03019	0.00369	0.3079	1.03348	1.02929	0.00471	0.39213	1.03348	1.0289	0.00515	0.42903	1.03348	1.02876	0.0053	0.44149	1.03348	1.02807	0.00608	0.50634
1.03333	1.02991	0.00383	0.31942	1.03333	1.02917	0.00467	0.38946	1.03333	1.02882	0.00507	0.42216	1.03333	1.02848	0.00544	0.45344	1.03333	1.02797	0.00602	0.50176
1.03317	1.02991	0.00366	0.30502	1.03317	1.02921	0.00445	0.37074	1.03317	1.0288	0.00491	0.40911	1.03317	1.02822	0.00557	0.46412	1.03317	1.02782	0.00601	0.501
1.03302	1.02958	0.00386	0.32178	1.03302	1.02908	0.00443	0.36924	1.03302	1.02841	0.00518	0.43157	1.03302	1.02807	0.00556	0.46336	1.03302	1.02758	0.00612	0.50964
1.03287	1.02964	0.00363	0.3022	1.03287	1.02871	0.00467	0.38887	1.03287	1.02848	0.00493	0.41082	1.03287	1.02804	0.00542	0.45191	1.03287	1.02742	0.00612	0.51015
1.03271	1.02927	0.00388	0.32295	1.03271	1.02854	0.00469	0.39098	1.03271	1.02825	0.00501	0.41784	1.03271	1.02803	0.00526	0.43844	1.03271	1.02729	0.00609	0.50761
1.03256	1.02935	0.00361	0.30055	1.03256	1.02858	0.00447	0.37244	1.03256	1.028	0.00512	0.42674	1.03256	1.02792	0.00521	0.43437	1.03256	1.02703	0.00622	0.51804
1.03241	1.02897	0.00387	0.32211	1.03241	1.02849	0.00441	0.36743	1.03241	1.02808	0.00487	0.40586	1.03241	1.02771	0.00529	0.44047	1.03241	1.02698	0.0061	0.50863
1.03226	1.02904	0.00361	0.30088	1.03226	1.02817	0.00459	0.38261	1.03226	1.0277	0.00512	0.42699	1.03226	1.02747	0.00538	0.44835	1.03226	1.02683	0.00609	0.50786
1.0321	1.02867	0.00386	0.3213	1.0321	1.02793	0.00469	0.39085	1.0321	1.02771	0.00494	0.41155	1.0321	1.02729	0.00541	0.4509	1.0321	1.02674	0.00603	0.50227
1.03195	1.02873	0.00362	0.30126	1.03195	1.02793	0.00452	0.37674	1.03195	1.0276	0.00489	0.40751	1.03195	1.02715	0.00539	0.44937	1.03195	1.02666	0.00595	0.49566
1.0318	1.0284	0.00382	0.3184	1.0318	1.02791	0.00437	0.36387	1.0318	1.02726	0.00511	0.42547	1.0318	1.02717	0.0052	0.43335	1.0318	1.02668	0.00575	0.47938
1.03165	1.0284	0.00365	0.30434	1.03165	1.02764	0.0045	0.37511	1.03165	1.02739	0.00478	0.39823	1.03165	1.02719	0.00501	0.41758	1.03165	1.02655	0.00572	0.47684
1.03149	1.02814	0.00377	0.31446	1.03149	1.02733	0.00468	0.39004	1.03149	1.02703	0.00502	0.41809	1.03149	1.02696	0.00509	0.42445	1.03149	1.02652	0.00559	0.46565
1.03134	1.02807	0.00367	0.30596	1.03134	1.02729	0.00455	0.37898	1.03134	1.02689	0.005	0.41682	1.03134	1.02671	0.00521	0.43411	1.03134	1.02632	0.00565	0.47048
1.03119	1.02786	0.00374	0.31138	1.03119	1.02731	0.00436	0.36331	1.03119	1.02693	0.00478	0.39859	1.03119	1.02644	0.00534	0.44479	1.03119	1.02622	0.00559	0.46565
1.03104	1.02774	0.00371	0.30904	1.03104	1.02708	0.00444	0.37008	1.03104	1.02648	0.00511	0.42623	1.03104	1.02626	0.00537	0.44759	1.03104	1.02595	0.00572	0.47633
1.03088	1.02761	0.00367	0.30617	1.03088	1.02676	0.00463	0.38572	1.03088	1.02657	0.00484	0.40365	1.03088	1.02626	0.0052	0.43335	1.03088	1.02581	0.0057	0.47531
1.03073	1.02739	0.00375	0.31255	1.03073	1.02666	0.00458	0.38155	1.03073	1.0264	0.00486	0.4054	1.03073	1.02618	0.00511	0.42572	1.03073	1.02564	0.00572	0.47684
1.03058	1.02734	0.00363	0.30281	1.03058	1.0267	0.00436	0.36339	1.03058	1.02607	0.00506	0.42191	1.03058	1.02609	0.00505	0.42063	1.03058	1.02543	0.00578	0.48192
1.03043	1.02707	0.00378	0.31459	1.03043	1.02655	0.00435	0.36247	1.03043	1.02622	0.00472	0.3935	1.03043	1.02594	0.00504	0.42038	1.03043	1.02534	0.00571	0.47582
1.03027	1.02708	0.00359	0.29933	1.03027	1.02619	0.00459	0.38221	1.03027	1.02584	0.00498	0.41478	1.03027	1.02563	0.00522	0.43513	1.03027	1.02514	0.00577	0.48091
1.03012	1.02676	0.00378	0.31461	1.03012	1.02604	0.00458	0.38172	1.03012	1.02578	0.00487	0.40609	1.03012	1.02544	0.00526	0.43844	1.03012	1.02513	0.00561	0.46717
1.02997	1.02681	0.00355	0.29569	1.02997	1.02608	0.00437	0.36382	1.02997	1.02578	0.00471	0.39218	1.02997	1.02533	0.00521	0.43411	1.02997	1.02503	0.00555	0.46209
1.02982	1.02643	0.00381	0.31728	1.02982	1.02598	0.00431	0.3595	1.02982	1.02536	0.005	0.41682	1.02982	1.02534	0.00503	0.41936	1.02982	1.02504	0.00536	0.44708
1.02966	1.02651	0.00354	0.29508	1.02966	1.02565	0.00451	0.37572	1.02966	1.02544	0.00475	0.39579	1.02966	1.02533	0.00486	0.4054	1.02966	1.0249	0.00535	0.44556
1.02951	1.02613	0.0038	0.3168	1.02951	1.02542	0.0046	0.3831	1.02951	1.02521	0.00483	0.4027	1.02951	1.0252	0.00485	0.4038	1.02951	1.02494	0.00514	0.42801
1.02936	1.02621	0.00354	0.29503	1.02936	1.02542	0.00442	0.36855	1.02936	1.02496	0.00495	0.41224	1.02936	1.02494	0.00497	0.41377	1.02936	1.02466	0.00527	0.43945
1.02921	1.02583	0.00379	0.31596	1.02921	1.0254	0.00428	0.35632	1.02921	1.02502	0.0047	0.39162	1.02921	1.02467	0.00509	0.42445	1.02921	1.02457	0.00521	0.43386
1.02905	1.02589	0.00355	0.29569	1.02905	1.02511	0.00443	0.36886	1.02905	1.02466	0.00494	0.41148	1.02905	1.02451	0.00511	0.42547	1.02905	1.02433	0.0053	0.44174
1.0289	1.02555	0.00376	0.31342	1.0289	1.02481	0.0046	0.38328	1.0289	1.02465	0.00478	0.39813	1.0289	1.02444	0.00501	0.41758	1.0289	1.02417	0.00531	0.4425
1.02875	1.02556	0.00359	0.29887	1.02875	1.02478	0.00445	0.37107	1.02875	1.02455	0.00471	0.39276	1.02875	1.02441	0.00488	0.40655	1.02875	1.02397	0.00537	0.44734
1.02859	1.02529	0.00371	0.30909	1.02859	1.02479	0.00427	0.35606	1.02859	1.0242	0.00494	0.41148	1.02859	1.02431	0.00482	0.40166	1.02859	1.02379	0.0054	0.44963
1.02844	1.02523	0.00361	0.30062	1.02844	1.02456	0.00437	0.36379	1.02844	1.02433	0.00462	0.385	1.02844	1.02416	0.00481	0.40082	1.02844	1.02368	0.00535	0.44581
1.02829	1.02502	0.00367	0.30609	1.02829	1.02424	0.00455	0.37903	1.02829	1.02397	0.00485	0.40408	1.02829	1.02386	0.00498	0.41504	1.02829	1.02347	0.00541	0.45115
1.02814	1.02489	0.00365	0.30388	1.02814	1.02414	0.00449	0.37443	1.02814	1.02383	0.00484	0.40362	1.02814	1.02355	0.00516	0.42979	1.02814	1.02342	0.0053	0.442
1.02798	1.02477	0.00362	0.30139	1.02798	1.02418	0.00428	0.35667	1.02798	1.02387	0.00463	0.38551	1.02798	1.02351	0.00503	0.41885	1.02798	1.02336	0.0052	0.43335
1.02783	1.02455	0.00369	0.30746	1.02783	1.02403	0.00428	0.35632	1.02783	1.02343	0.00495	0.41224	1.02783	1.02348	0.00488	0.40705	1.02783	1.02331	0.00508	0.42318
1.02768	1.0245	0.00357	0.29757	1.02768	1.02367	0.00451	0.37577	1.02768	1.02351	0.00469	0.39063	1.02768	1.02347	0.00473	0.39424	1.02768	1.02317	0.00506	0.42191
1.02753	1.02422	0.00371	0.30958	1.02753	1.02349	0.00453	0.3776	1.02753	1.02334	0.00471	0.39223	1.02753	1.02337	0.00468	0.38961	1.02753	1.02323	0.00483	0.4025
1.02737	1.02423	0.00353	0.29442	1.02737	1.02355	0.0043	0.35853	1.02737	1.023	0.00491	0.40919	1.02737	1.02309	0.00481	0.40103	1.02737	1.02296	0.00496	0.41364
1.02722	1.0239	0.00374	0.31141	1.02722	1.02344	0.00425	0.35411	1.02722	1.02316	0.00457	0.38055	1.02722	1.02288	0.00488	0.40667	1.02722	1.02285	0.00491	0.40937
1.02707	1.02395	0.0035	0.292	1.02707	1.02312	0.00444	0.3702	1.02707	1.02278	0.00482	0.40159	1.02707	1.0227	0.00491	0.40952	1.02707	1.02267	0.00494	0.41158
1.02692	1.02358	0.00375	0.31275	1.02692	1.02289	0.00452	0.37702	1.02692	1.02269	0.00475	0.39607	1.02692	1.02257	0.00488	0.4069	1.02692	1.02248	0.00498	0.41504
1.02676	1.02366	0.00349	0.29088	1.02676	1.02289	0.00435	0.36252	1.02676	1.0227	0.00457	0.38088	1.02676	1.0226	0.00468	0.38966	1.02676	1.02224	0.00508	0.42369
1.02661	1.02328	0.00374	0.31192	1.02661	1.02287	0.0042	0.35024	1.02661	1.02227	0.00488	0.40639	1.02661	1.02255	0.00456	0.3803	1.02661	1.02207	0.0051	0.42496
1.02646	1.02335	0.00349	0.29088	1.02646	1.02258	0.00435	0.36288	1.02646	1.02236	0.00461	0.38409	1.02646	1.02236	0.00461	0.38414	1.02646	1.02194	0.00507	0.42267
1.02631	1.02298	0.00374	0.31166	1.02631	1.02228	0.00453	0.3771	1.02631	1.02213	0.00469	0.3908	1.02631	1.02207	0.00476	0.39663	1.02631	1.02178	0.00508	0.42369
1.02615	1.02304	0.0035	0.29149	1.02615	1.02226	0.00438	0.36499	1.02615	1.02187	0.00482	0.40138	1.02615	1.02179	0.0049	0.40868	1.02615	1.02168	0.00503	0.41885
1.026	1.02271	0.0037	0.30861	1.026	1.02227	0.00419	0.34917	1.026	1.02195	0.00456	0.37969	1.026	1.02165	0.00489	0.4071	1.026	1.02166	0.00488	0.40672
1.02585	1.0227	0.00353	0.29444	1.02585	1.02202	0.0043	0.3581	1.02585	1.02159	0.00479	0.39904	1.02585	1.02162	0.00475	0.39569	1.02585	1.02156	0.00481	0.4011
1.0257	1.02244	0.00366	0.3049	1.0257	1.02171	0.00448	0.37308	1.0257	1.02156	0.00465	0.38755	1.0257	1.02161	0.00459	0.38266	1.0257	1.02145	0.00477	0.3979
1.02554	1.02238	0.00355	0.29602	1.02554	1.02161	0.00442	0.36814	1.02554	1.02148	0.00456	0.38015	1.02554	1.02149	0.00455	0.37905	1.02554	1.02145	0.0046	0.38325
1.02539	1.02217	0.00362	0.30184	1.02539	1.02165	0.0042	0.35039	1.02539	1.02112	0.0048	0.40019	1.02539	1.02127	0.00463	0.3861	1.02539	1.02123	0.00467	0.38915
1.02524	1.02204	0.00359	0.29945	1.02524	1.02149	0.00421	0.35105	1.02524	1.02124	0.0045	0.37468	1.02524	1.02102	0.00474	0.39462	1.02524	1.02113	0.00461	0.38419
1.02509	1.02192	0.00356	0.29678	1.02509	1.02113	0.00444	0.37005	1.02509	1.02089	0.00471	0.39281	1.02509	1.02084	0.00477	0.39721	1.02509	1.02096	0.00464	0.38673
1.02493	1.0217	0.00363	0.30256	1.02493	1.02096	0.00447	0.37209	1.02493	1.02074	0.00471	0.39271	1.02493	1.02071	0.00475	0.39561	1.02493	1.02077	0.00467	0.38935
1.02478	1.02165	0.00352	0.29307	1.02478	1.02102	0.00423	0.35238	1.02478	1.02078	0.00449	0.3745	1.02478	1.02073	0.00456	0.37964	1.02478	1.0205	0.00481	0.40082
1.02463	1.02137	0.00367	0.30546	1.02463	1.02091	0.00418	0.34826	1.02463	1.02034	0.00482	0.40166	1.02463	1.02074	0.00437	0.36423	1.02463	1.02036	0.0048	0.39988
1.02448	1.02138	0.00348	0.28984	1.02448	1.02058	0.00438	0.36494	1.02448	1.02042	0.00456	0.37979	1.02448	1.02051	0.00446	0.3717	1.02448	1.02015	0.00486	0.4051
1.02432	1.02104	0.00368	0.30698	1.02432	1.02036	0.00445	0.37086	1.02432	1.02026	0.00457	0.38076	1.02432	1.02024	0.00458	0.38183	1.02432	1.02008	0.00476	0.39693
1.02417	1.0211	0.00345	0.28745	1.02417	1.02037	0.00427	0.35586	1.02417	1.01993	0.00477	0.39731	1.02417	1.01997	0.00471	0.39281	1.02417	1.01993	0.00476	0.39706
1.02402	1.02072	0.0037	0.30856	1.02402	1.02033	0.00414	0.34513	1.02402	1.02007	0.00444	0.36972	1.02402	1.01979	0.00475	0.39584	1.02402	1.01993	0.00459	0.38284
1.02386	1.02081	0.00343	0.286	1.02386	1.02005	0.00429	0.35751	1.02386	1.0197	0.00469	0.39042	1.02386	1.01978	0.00459	0.38228	1.02386	1.01982	0.00454	0.37839
1.02371	1.02043	0.00369	0.30764	1.02371	1.01975	0.00445	0.37125	1.02371	1.01959	0.00464	0.38628	1.02371	1.01972	0.00449	0.37412	1.02371	1.01972	0.00449	0.37392
1.02356	1.0205	0.00343	0.28615	1.02356	1.01973	0.00431	0.35884	1.02356	1.01961	0.00444	0.36964	1.02356	1.01962	0.00443	0.36896	1.02356	1.01966	0.00438	0.36507
1.02341	1.02013	0.00368	0.30683	1.02341	1.01974	0.00412	0.34348	1.02341	1.01918	0.00475	0.39561	1.02341	1.01945	0.00444	0.37036	1.02341	1.0195	0.00439	0.36601
1.02325	1.02019	0.00344	0.28669	1.02325	1.01949	0.00423	0.35281	1.02325	1.01927	0.00448	0.37331	1.02325	1.01914	0.00462	0.38498	1.02325	1.01943	0.00429	0.35769
1.0231	1.01985	0.00365	0.30413	1.0231	1.01917	0.00441	0.36771	1.0231	1.01905	0.00456	0.37964	1.0231	1.01893	0.00469	0.39101	1.0231	1.01923	0.00435	0.3629
1.02295	1.01985	0.00348	0.2901	1.02295	1.01909	0.00434	0.36174	1.02295	1.01878	0.00469	0.39078	1.02295	1.01882	0.00464	0.38635	1.02295	1.01904	0.00439	0.36558
1.0228	1.01959	0.00361	0.3005	1.0228	1.01911	0.00414	0.3452	1.0228	1.01886	0.00442	0.36842	1.0228	1.01883	0.00446	0.37137	1.0228	1.01877	0.00453	0.37717
1.02264	1.01952	0.00351	0.2921	1.02264	1.01895	0.00416	0.34627	1.02264	1.01851	0.00465	0.38729	1.02264	1.01882	0.00429	0.35772	1.02264	1.01865	0.00449	0.37384
1.02249	1.01932	0.00357	0.29737	1.02249	1.01859	0.00438	0.36502	1.02249	1.01846	0.00453	0.3776	1.02249	1.01867	0.0043	0.35802	1.02249	1.01835	0.00465	0.38734
1.02234	1.01918	0.00354	0.29538	1.02234	1.01843	0.00439	0.36603	1.02234	1.0184	0.00442	0.3687	1.02234	1.01842	0.0044	0.3668	1.02234	1.01837	0.00446	0.37191
1.02219	1.01906	0.00351	0.29233	1.02219	1.01849	0.00415	0.34602	1.02219	1.01803	0.00467	0.3893	1.02219	1.01815	0.00454	0.37837	1.02219	1.0182	0.00448	0.37331
1.02203	1.01884	0.00358	0.29859	1.02203	1.01837	0.00411	0.34292	1.02203	1.01814	0.00438	0.36479	1.02203	1.01798	0.00456	0.38002	1.02203	1.01817	0.00435	0.36222
1.02188	1.01879	0.00347	0.28898	1.02188	1.01804	0.00432	0.35968	1.02188	1.01781	0.00458	0.38127	1.02188	1.01792	0.00445	0.37097	1.02188	1.01807	0.00428	0.35673
1.02173	1.01852	0.00361	0.30085	1.02173	1.01783	0.00438	0.36494	1.02173	1.01765	0.00458	0.38208	1.02173	1.01787	0.00433	0.36105	1.02173	1.018	0.00419	0.34943
1.02158	1.01853	0.00343	0.28564	1.02158	1.01784	0.0042	0.34966	1.02158	1.01769	0.00437	0.36385	1.02158	1.01776	0.00428	0.35706	1.02158	1.01791	0.00411	0.34286
1.02142	1.01818	0.00364	0.30322	1.02142	1.0178	0.00407	0.33923	1.02142	1.01725	0.00469	0.39116	1.02142	1.01763	0.00426	0.35533	1.02142	1.01776	0.00412	0.34335
1.02127	1.01824	0.0034	0.28353	1.02127	1.01751	0.00423	0.35258	1.02127	1.01733	0.00443	0.36942	1.02127	1.01732	0.00444	0.37025	1.02127	1.0177	0.00401	0.33452
1.02112	1.01787	0.00366	0.30459	1.02112	1.01722	0.00438	0.3653	1.02112	1.01718	0.00443	0.36919	1.02112	1.01702	0.0046	0.38353	1.02112	1.01749	0.00408	0.34017
1.02097	1.01795	0.00339	0.28226	1.02097	1.01719	0.00424	0.35344	1.02097	1.01684	0.00464	0.38658	1.02097	1.01698	0.00448	0.37341	1.02097	1.01729	0.00413	0.34411
1.02081	1.01757	0.00364	0.3035	1.02081	1.0172	0.00406	0.33819	1.02081	1.01699	0.0043	0.35825	1.02081	1.01695	0.00434	0.36194	1.02081	1.01706	0.00422	0.35169
1.02066	1.01765	0.00338	0.28206	1.02066	1.01695	0.00417	0.34785	1.02066	1.01661	0.00455	0.37923	1.02066	1.01693	0.00419	0.34917	1.02066	1.01693	0.00419	0.34935
1.02051	1.01728	0.00363	0.30261	1.02051	1.01664	0.00435	0.3624	1.02051	1.0165	0.00451	0.37567	1.02051	1.01683	0.00413	0.34439	1.02051	1.01661	0.00438	0.36509
1.02036	1.01733	0.0034	0.28305	1.02036	1.01655	0.00427	0.35601	1.02036	1.01652	0.00431	0.35891	1.02036	1.01656	0.00427	0.35571	1.02036	1.01662	0.00419	0.34953
1.0202	1.017	0.0036	0.30011	1.0202	1.01658	0.00407	0.33951	1.0202	1.01608	0.00463	0.38592	1.0202	1.01633	0.00435	0.36273	1.0202	1.01646	0.0042	0.35004
1.02005	1.01699	0.00343	0.28623	1.02005	1.0164	0.0041	0.34154	1.02005	1.01617	0.00436	0.36374	1.02005	1.01615	0.00438	0.36509	1.02005	1.01637	0.00413	0.34414
1.0199	1.01673	0.00355	0.29622	1.0199	1.01606	0.00432	0.35975	1.0199	1.01596	0.00443	0.36893	1.0199	1.01603	0.00435	0.36224	1.0199	1.01629	0.00405	0.3374
1.01974	1.01667	0.00346	0.28811	1.01974	1.01589	0.00433	0.36054	1.01974	1.01568	0.00457	0.38106	1.01974	1.01605	0.00415	0.34579	1.01974	1.01626	0.00391	0.32616
1.01959	1.01646	0.00352	0.29305	1.01959	1.01595	0.00409	0.34065	1.01959	1.01578	0.00429	0.35741	1.01959	1.01598	0.00406	0.33811	1.01959	1.01616	0.00386	0.3214
1.01944	1.01632	0.0035	0.29177	1.01944	1.01584	0.00405	0.33722	1.01944	1.01542	0.00452	0.37651	1.01944	1.0158	0.00409	0.34075	1.01944	1.01602	0.00384	0.32023
1.01929	1.01621	0.00346	0.28829	1.01929	1.01549	0.00426	0.35507	1.01929	1.01536	0.00442	0.36817	1.01929	1.01552	0.00424	0.35314	1.01929	1.01592	0.00378	0.31527
1.01913	1.01598	0.00354	0.29508	1.01913	1.01529	0.00432	0.36006	1.01913	1.0153	0.0043	0.35863	1.01913	1.01523	0.00439	0.36573	1.01913	1.01574	0.00381	0.31771
1.01898	1.01594	0.00342	0.28475	1.01898	1.01531	0.00412	0.34358	1.01898	1.01494	0.00454	0.3787	1.01898	1.0151	0.00436	0.36374	1.01898	1.0155	0.00391	0.32565
1.01883	1.01565	0.00357	0.29727	1.01883	1.01526	0.00402	0.33468	1.01883	1.01503	0.00427	0.35619	1.01883	1.01506	0.00423	0.35263	1.01883	1.01532	0.00394	0.32867
1.01868	1.01567	0.00338	0.2818	1.01868	1.01496	0.00418	0.34823	1.01868	1.01472	0.00445	0.37048	1.01868	1.01506	0.00407	0.33892	1.01868	1.01517	0.00394	0.32796
1.01852	1.01533	0.00359	0.29915	1.01852	1.01467	0.00433	0.3609	1.01852	1.01453	0.00448	0.37366	1.01852	1.01493	0.00404	0.33643	1.01852	1.01489	0.00408	0.33981
1.01837	1.01539	0.00335	0.27908	1.01837	1.01466	0.00418	0.34795	1.01837	1.01459	0.00425	0.35403	1.01837	1.01469	0.00413	0.34426	1.01837	1.01486	0.00395	0.3288
1.01822	1.01501	0.0036	0.30037	1.01822	1.01467	0.00399	0.33264	1.01822	1.01416	0.00457	0.3805	1.01822	1.01446	0.00422	0.35174	1.01822	1.01469	0.00397	0.33051
1.01807	1.0151	0.00334	0.27814	1.01807	1.0144	0.00412	0.34302	1.01807	1.01422	0.00432	0.36021	1.01807	1.01429	0.00425	0.35395	1.01807	1.01459	0.00391	0.32562
1.01791	1.0147	0.00361	0.30052	1.01791	1.01407	0.00431	0.35947	1.01791	1.01406	0.00433	0.361	1.01791	1.01412	0.00427	0.35548	1.01791	1.01449	0.00385	0.32097
1.01776	1.01478	0.00335	0.27893	1.01776	1.01401	0.00421	0.3511	1.01776	1.01373	0.00453	0.37776	1.01776	1.01415	0.00406	0.33844	1.01776	1.01448	0.00368	0.30688
1.01761	1.01441	0.00359	0.29956	1.01761	1.01403	0.00402	0.3347	1.01761	1.01387	0.0042	0.3496	1.01761	1.01415	0.00388	0.32356	1.01761	1.01436	0.00365	0.30418
1.01746	1.01447	0.00336	0.27962	1.01746	1.01385	0.00405	0.33742	1.01746	1.01351	0.00444	0.3699	1.01746	1.01392	0.00397	0.33086	1.01746	1.01429	0.00356	0.29638
1.0173	1.01414	0.00355	0.2962	1.0173	1.01351	0.00426	0.35522	1.0173	1.01339	0.0044	0.36659	1.0173	1.01365	0.0041	0.34182	1.0173	1.0141	0.0036	0.29981
1.01715	1.01413	0.00339	0.28262	1.01715	1.01335	0.00427	0.35589	1.01715	1.01342	0.00419	0.34935	1.01715	1.01338	0.00424	0.35324	1.01715	1.01398	0.00357	0.29719
1.017	1.01387	0.00351	0.29246	1.017	1.01342	0.00402	0.33506	1.017	1.01298	0.00452	0.37646	1.017	1.0132	0.00427	0.35545	1.017	1.01371	0.00369	0.30759
1.01685	1.01381	0.00341	0.2844	1.01685	1.01329	0.00399	0.33274	1.01685	1.01306	0.00425	0.35411	1.01685	1.0132	0.0041	0.34182	1.01685	1.01355	0.0037	0.30866
1.01669	1.0136	0.00347	0.28946	1.01669	1.01295	0.0042	0.35029	1.01669	1.01286	0.00431	0.35932	1.01669	1.01313	0.004	0.33348	1.01669	1.01338	0.00372	0.30978
1.01654	1.01347	0.00345	0.28768	1.01654	1.01275	0.00426	0.35482	1.01654	1.01256	0.00447	0.37285	1.01654	1.01302	0.00395	0.32936	1.01654	1.01316	0.0038	0.31637
1.01639	1.01335	0.00341	0.28447	1.01639	1.01278	0.00406	0.33811	1.01639	1.01268	0.00417	0.34762	1.01639	1.01285	0.00397	0.33089	1.01639	1.01307	0.00373	0.31087
1.01624	1.01312	0.0035	0.29134	1.01624	1.01271	0.00396	0.33025	1.01624	1.01231	0.00441	0.36784	1.01624	1.01255	0.00414	0.34495	1.01624	1.01287	0.00378	0.31507
1.01608	1.01308	0.00337	0.28102	1.01608	1.01241	0.00412	0.34342	1.01608	1.01225	0.00431	0.35929	1.01608	1.01234	0.00421	0.35072	1.01608	1.01279	0.0037	0.30823
1.01593	1.0128	0.00352	0.29343	1.01593	1.01212	0.00428	0.35629	1.01593	1.0122	0.00419	0.34897	1.01593	1.01223	0.00416	0.34645	1.01593	1.0127	0.00362	0.302
1.01578	1.01281	0.00334	0.27796	1.01578	1.01211	0.00412	0.34309	1.01578	1.01183	0.00444	0.36997	1.01578	1.01224	0.00398	0.3315	1.01578	1.0127	0.00346	0.28806
1.01563	1.01247	0.00354	0.29531	1.01563	1.01213	0.00393	0.32756	1.01563	1.01191	0.00418	0.34826	1.01563	1.01224	0.00381	0.31728	1.01563	1.01256	0.00345	0.28742
1.01547	1.01252	0.00332	0.27664	1.01547	1.01184	0.00408	0.34012	1.01547	1.0116	0.00435	0.36237	1.01547	1.01204	0.00385	0.32125	1.01547	1.01254	0.0033	0.27466
1.01532	1.01214	0.00357	0.29744	1.01532	1.01153	0.00426	0.35461	1.01532	1.01141	0.0044	0.36631	1.01532	1.0118	0.00396	0.32982	1.01532	1.01228	0.00341	0.28432
1.01517	1.01223	0.0033	0.27491	1.01517	1.01147	0.00415	0.34607	1.01517	1.01147	0.00416	0.3465	1.01517	1.01152	0.0041	0.34167	1.01517	1.01218	0.00335	0.27936
1.01501	1.01185	0.00355	0.29612	1.01501	1.01149	0.00396	0.32977	1.01501	1.01105	0.00446	0.3715	1.01501	1.01135	0.00411	0.34276	1.01501	1.01193	0.00347	0.28893
1.01486	1.01193	0.0033	0.27499	1.01486	1.0113	0.004	0.33346	1.01486	1.0111	0.00422	0.35179	1.01486	1.01131	0.00399	0.33274	1.01486	1.01175	0.0035	0.29129
1.01471	1.01156	0.00354	0.29523	1.01471	1.01096	0.00421	0.3507	1.01471	1.01096	0.00421	0.35105	1.01471	1.01124	0.00389	0.32453	1.01471	1.01156	0.00354	0.29465
1.01456	1.01161	0.00331	0.27578	1.01456	1.01081	0.00421	0.35072	1.01456	1.01062	0.00442	0.36822	1.01456	1.01114	0.00384	0.3197	1.01456	1.01137	0.00358	0.29816
1.0144	1.01128	0.00351	0.29233	1.0144	1.01088	0.00396	0.33028	1.0144	1.01077	0.00408	0.33989	1.0144	1.011	0.00383	0.31896	1.0144	1.01125	0.00354	0.29521
1.01425	1.01127	0.00335	0.27883	1.01425	1.01075	0.00394	0.32804	1.01425	1.0104	0.00433	0.36079	1.01425	1.01068	0.00401	0.33424	1.01425	1.01104	0.00361	0.30118
1.0141	1.01101	0.00347	0.28893	1.0141	1.0104	0.00416	0.34645	1.0141	1.01028	0.0043	0.358	1.0141	1.0104	0.00416	0.34658	1.0141	1.01098	0.0035	0.29193
1.01395	1.01095	0.00337	0.28104	1.01395	1.01021	0.0042	0.35019	1.01395	1.01031	0.00409	0.3406	1.01395	1.01034	0.00405	0.3373	1.01395	1.01089	0.00343	0.28587
1.01379	1.01074	0.00343	0.28557	1.01379	1.01024	0.004	0.33295	1.01379	1.00986	0.00442	0.36812	1.01379	1.01033	0.0039	0.32468	1.01379	1.01086	0.0033	0.27479
1.01364	1.0106	0.00341	0.28455	1.01364	1.01016	0.00391	0.326	1.01364	1.00995	0.00415	0.34548	1.01364	1.01031	0.00375	0.31209	1.01364	1.01072	0.00328	0.27344
1.01349	1.01049	0.00337	0.28069	1.01349	1.00986	0.00408	0.33999	1.01349	1.00975	0.0042	0.35039	1.01349	1.01021	0.00369	0.30721	1.01349	1.01076	0.00307	0.25556
1.01334	1.01027	0.00345	0.28748	1.01334	1.00959	0.00421	0.3511	1.01334	1.00945	0.00437	0.3642	1.01334	1.00993	0.00383	0.31876	1.01334	1.01047	0.00322	0.26807
1.01318	1.01022	0.00333	0.27756	1.01318	1.00958	0.00405	0.33758	1.01318	1.00957	0.00406	0.33852	1.01318	1.0097	0.00392	0.32649	1.01318	1.01036	0.00317	0.26405
1.01303	1.00993	0.00348	0.29032	1.01303	1.00958	0.00388	0.32323	1.01303	1.00919	0.00431	0.3594	1.01303	1.00951	0.00395	0.32944	1.01303	1.01016	0.00323	0.26883
1.01288	1.00995	0.0033	0.27466	1.01288	1.00931	0.00401	0.33457	1.01288	1.00912	0.00422	0.35189	1.01288	1.0094	0.00391	0.3256	1.01288	1.00998	0.00325	0.27115
1.01273	1.00961	0.00351	0.29215	1.01273	1.00899	0.0042	0.34991	1.01273	1.00909	0.00408	0.34035	1.01273	1.00942	0.00372	0.30993	1.01273	1.00974	0.00336	0.27962
1.01257	1.00967	0.00326	0.27201	1.01257	1.00894	0.00409	0.34042	1.01257	1.00872	0.00433	0.36059	1.01257	1.00933	0.00365	0.30403	1.01257	1.00956	0.00339	0.28208
1.01242	1.00929	0.00352	0.29348	1.01242	1.00895	0.0039	0.32489	1.01242	1.00878	0.00409	0.34083	1.01242	1.00916	0.00366	0.3053	1.01242	1.00943	0.00336	0.28028
1.01227	1.00937	0.00325	0.2711	1.01227	1.00875	0.00395	0.32903	1.01227	1.00851	0.00422	0.35189	1.01227	1.00886	0.00382	0.31865	1.01227	1.00925	0.00339	0.28282
1.01212	1.00899	0.00351	0.29277	1.01212	1.00842	0.00415	0.34602	1.01212	1.0083	0.00429	0.35739	1.01212	1.00857	0.00398	0.3319	1.01212	1.00915	0.00333	0.27746
1.01196	1.00907	0.00325	0.27105	1.01196	1.00828	0.00414	0.34505	1.01196	1.00836	0.00404	0.33702	1.01196	1.00847	0.00393	0.3274	1.01196	1.00912	0.0032	0.26634
1.01181	1.00869	0.0035	0.29172	1.01181	1.00834	0.0039	0.32499	1.01181	1.00795	0.00434	0.3613	1.01181	1.00842	0.0038	0.317	1.01181	1.00902	0.00313	0.26121
1.01166	1.00875	0.00326	0.27204	1.01166	1.0082	0.00388	0.32331	1.01166	1.008	0.00411	0.34246	1.01166	1.00841	0.00365	0.30375	1.01166	1.0089	0.0031	0.25833
1.01151	1.00842	0.00346	0.28875	1.01151	1.00784	0.00411	0.34276	1.01151	1.00786	0.00409	0.34114	1.01151	1.0083	0.00361	0.30055	1.01151	1.00892	0.00291	0.24218
1.01135	1.00841	0.0033	0.27514	1.01135	1.00766	0.00414	0.34533	1.01135	1.00752	0.00431	0.35886	1.01135	1.00805	0.00371	0.3095	1.01135	1.00867	0.00302	0.25157
1.0112	1.00815	0.00342	0.28529	1.0112	1.0077	0.00394	0.32817	1.0112	1.00766	0.00397	0.33104	1.0112	1.00782	0.0038	0.31649	1.0112	1.00855	0.00298	0.24841
1.01105	1.00808	0.00333	0.27753	1.01105	1.00761	0.00386	0.32168	1.01105	1.00729	0.00422	0.35184	1.01105	1.00763	0.00384	0.31972	1.01105	1.00837	0.003	0.25024
1.01089	1.00788	0.00338	0.28198	1.01089	1.00731	0.00403	0.33607	1.01089	1.00716	0.0042	0.34986	1.01089	1.00749	0.00382	0.31837	1.01089	1.00818	0.00305	0.25401
1.01074	1.00774	0.00337	0.28109	1.01074	1.00704	0.00416	0.34696	1.01074	1.0072	0.00398	0.33183	1.01074	1.00752	0.00362	0.30131	1.01074	1.00791	0.00318	0.26474
1.01059	1.00763	0.00333	0.2771	1.01059	1.00703	0.004	0.33368	1.01059	1.00675	0.00432	0.35983	1.01059	1.00752	0.00345	0.28783	1.01059	1.00776	0.00318	0.26522
1.01044	1.0074	0.00341	0.28425	1.01044	1.00703	0.00383	0.31919	1.01044	1.00683	0.00405	0.33758	1.01044	1.00729	0.00354	0.29493	1.01044	1.00757	0.00322	0.26805
1.01028	1.00736	0.00329	0.2741	1.01028	1.00675	0.00397	0.33056	1.01028	1.00663	0.0041	0.34203	1.01028	1.00701	0.00368	0.30657	1.01028	1.00746	0.00318	0.26459
1.01013	1.00707	0.00344	0.28689	1.01013	1.00643	0.00415	0.3462	1.01013	1.00632	0.00428	0.3565	1.01013	1.00674	0.00381	0.31766	1.01013	1.00732	0.00316	0.26296
1.00998	1.00709	0.00325	0.27097	1.00998	1.00639	0.00403	0.33595	1.00998	1.00646	0.00396	0.32969	1.00998	1.00656	0.00385	0.32059	1.00998	1.0073	0.00301	0.25045
1.00983	1.00674	0.00346	0.28862	1.00983	1.00641	0.00384	0.31993	1.00983	1.00608	0.00421	0.3508	1.00983	1.00654	0.0037	0.30815	1.00983	1.0072	0.00295	0.2459
1.00967	1.00681	0.00322	0.26855	1.00967	1.00619	0.00391	0.3258	1.00967	1.006	0.00413	0.34414	1.00967	1.00648	0.00359	0.29892	1.00967	1.00708	0.00291	0.24277
1.00952	1.00643	0.00348	0.28987	1.00952	1.00587	0.0041	0.34203	1.00952	1.00598	0.00398	0.33147	1.00952	1.00638	0.00353	0.29424	1.00952	1.00705	0.00278	0.2316
1.00937	1.00651	0.00321	0.26738	1.00937	1.00574	0.00408	0.34012	1.00937	1.0056	0.00424	0.35324	1.00937	1.0062	0.00356	0.29691	1.00937	1.00685	0.00283	0.23547
1.00922	1.00613	0.00347	0.28933	1.00922	1.00579	0.00385	0.32094	1.00922	1.00566	0.004	0.33297	1.00922	1.0059	0.00372	0.31026	1.00922	1.00676	0.00276	0.23041
1.00906	1.0062	0.00321	0.26784	1.00906	1.00566	0.00383	0.31914	1.00906	1.0054	0.00411	0.34266	1.00906	1.0057	0.00378	0.31512	1.00906	1.00657	0.0028	0.23366
1.00891	1.00583	0.00346	0.28844	1.00891	1.00529	0.00406	0.33869	1.00891	1.00517	0.0042	0.34988	1.00891	1.00558	0.00375	0.31235	1.00891	1.00638	0.00284	0.23679
1.00876	1.00589	0.00322	0.26871	1.00876	1.00511	0.00409	0.34124	1.00876	1.00524	0.00395	0.32946	1.00876	1.00559	0.00356	0.29699	1.00876	1.00609	0.00299	0.24943
1.00861	1.00555	0.00343	0.2857	1.00861	1.00515	0.00388	0.32326	1.00861	1.00484	0.00423	0.35283	1.00861	1.00558	0.0034	0.2831	1.00861	1.00596	0.00297	0.24775
1.00845	1.00555	0.00327	0.27219	1.00845	1.00506	0.00382	0.31815	1.00845	1.00487	0.00402	0.33513	1.00845	1.00539	0.00344	0.28689	1.00845	1.0057	0.0031	0.25815
1.0083	1.00529	0.00339	0.28219	1.0083	1.00475	0.00399	0.33262	1.0083	1.00475	0.00399	0.33274	1.0083	1.00515	0.00354	0.29493	1.0083	1.00567	0.00295	0.24618
1.00815	1.00524	0.00327	0.27255	1.00815	1.00452	0.00408	0.33997	1.00815	1.00443	0.00418	0.34795	1.00815	1.0049	0.00365	0.30388	1.00815	1.00554	0.00294	0.24465
1.008	1.00503	0.00333	0.27789	1.008	1.0045	0.00392	0.32687	1.008	1.00457	0.00385	0.32069	1.008	1.00472	0.00368	0.30675	1.008	1.00551	0.00279	0.23262
1.00784	1.00488	0.00333	0.27725	1.00784	1.00449	0.00377	0.31403	1.00784	1.0042	0.0041	0.34136	1.00784	1.00468	0.00355	0.296	1.00784	1.0054	0.00274	0.2287
1.00769	1.00477	0.00328	0.27351	1.00769	1.00421	0.00391	0.32611	1.00769	1.00405	0.00409	0.34055	1.00769	1.00461	0.00346	0.28826	1.00769	1.00531	0.00268	0.22329
1.00754	1.00454	0.00337	0.28056	1.00754	1.0039	0.00409	0.34108	1.00754	1.00409	0.00388	0.32305	1.00754	1.00451	0.0034	0.28374	1.00754	1.00522	0.0026	0.21701
1.00739	1.0045	0.00324	0.27016	1.00739	1.00386	0.00396	0.3304	1.00739	1.00364	0.0042	0.35029	1.00739	1.00435	0.00341	0.28376	1.00739	1.00506	0.00262	0.21797
1.00723	1.00421	0.0034	0.28308	1.00723	1.00386	0.00379	0.31542	1.00723	1.00372	0.00394	0.3287	1.00723	1.00403	0.0036	0.29971	1.00723	1.005	0.00251	0.20927
1.00708	1.00422	0.00321	0.26744	1.00708	1.00365	0.00386	0.3213	1.00708	1.00353	0.00399	0.33221	1.00708	1.00376	0.00373	0.31087	1.00708	1.00479	0.00258	0.21484
1.00693	1.00388	0.00342	0.28529	1.00693	1.00332	0.00405	0.33791	1.00693	1.00321	0.00417	0.3479	1.00693	1.00369	0.00364	0.30306	1.00693	1.00457	0.00264	0.22039
1.00677	1.00394	0.00318	0.26507	1.00677	1.0032	0.00402	0.33468	1.00677	1.00335	0.00384	0.32036	1.00677	1.00368	0.00348	0.28982	1.00677	1.00432	0.00275	0.22952
1.00662	1.00356	0.00344	0.28653	1.00662	1.00324	0.0038	0.31629	1.00662	1.00297	0.0041	0.3417	1.00662	1.00366	0.00333	0.27779	1.00662	1.00419	0.00273	0.22769
1.00647	1.00365	0.00317	0.26431	1.00647	1.0031	0.00378	0.31525	1.00647	1.00289	0.00403	0.33552	1.00647	1.00354	0.00329	0.27418	1.00647	1.00388	0.00292	0.24292
1.00632	1.00327	0.00343	0.28557	1.00632	1.00274	0.00402	0.33511	1.00632	1.00287	0.00387	0.32275	1.00632	1.00328	0.00342	0.28473	1.00632	1.00388	0.00274	0.22814
1.00616	1.00334	0.00318	0.26461	1.00616	1.00257	0.00404	0.33691	1.00616	1.00248	0.00414	0.34526	1.00616	1.00303	0.00352	0.29338	1.00616	1.00371	0.00276	0.2297
1.00601	1.00297	0.00342	0.28498	1.00601	1.00261	0.00383	0.31883	1.00601	1.00254	0.0039	0.32499	1.00601	1.00285	0.00355	0.29577	1.00601	1.00365	0.00266	0.22143
1.00586	1.00302	0.00319	0.2656	1.00586	1.00251	0.00376	0.31375	1.00586	1.0023	0.004	0.33295	1.00586	1.00274	0.0035	0.29177	1.00586	1.00355	0.00259	0.21586
1.00571	1.00269	0.00339	0.28231	1.00571	1.00219	0.00396	0.32962	1.00571	1.00206	0.0041	0.3419	1.00571	1.00274	0.00334	0.27817	1.00571	1.0035	0.00249	0.20709
1.00555	1.00268	0.00323	0.26891	1.00555	1.00194	0.00406	0.33798	1.00555	1.00212	0.00386	0.32178	1.00555	1.00264	0.00327	0.27283	1.00555	1.0034	0.00243	0.20215
1.0054	1.00242	0.00335	0.27883	1.0054	1.00194	0.00389	0.32389	1.0054	1.00173	0.00412	0.34355	1.0054	1.00248	0.00328	0.27311	1.0054	1.00324	0.00243	0.20279
1.00525	1.00236	0.00325	0.27072	1.00525	1.00193	0.00373	0.3108	1.00525	1.00175	0.00393	0.32753	1.00525	1.00219	0.00344	0.28681	1.00525	1.00316	0.00235	0.19597
1.0051	1.00215	0.00331	0.27568	1.0051	1.00165	0.00388	0.323	1.0051	1.00163	0.00389	0.3245	1.0051	1.00189	0.00361	0.3005	1.0051	1.00296	0.0024	0.19999
1.00494	1.00201	0.00329	0.27453	1.00494	1.00134	0.00405	0.33786	1.00494	1.00128	0.00411	0.34274	1.00494	1.00179	0.00355	0.29551	1.00494	1.00274	0.00248	0.20653
1.00479	1.0019	0.00325	0.27061	1.00479	1.0013	0.00392	0.32651	1.00479	1.00142	0.00379	0.31545	1.00479	1.00175	0.00342	0.28496	1.00479	1.00252	0.00255	0.21233
1.00464	1.00167	0.00333	0.27786	1.00464	1.00132	0.00373	0.3111	1.00464	1.00105	0.00403	0.33582	1.00464	1.00174	0.00325	0.27112	1.00464	1.00238	0.00254	0.21189
1.00449	1.00163	0.00321	0.26766	1.00449	1.00109	0.00382	0.3183	1.00449	1.00091	0.00402	0.33478	1.00449	1.00162	0.00322	0.26805	1.00449	1.00206	0.00273	0.22728
1.00433	1.00134	0.00336	0.28015	1.00433	1.00077	0.00401	0.33409	1.00433	1.00094	0.00381	0.31748	1.00433	1.00137	0.00333	0.27751	1.00433	1.00205	0.00257	0.21406
1.00418	1.00136	0.00317	0.26438	1.00418	1.00065	0.00397	0.33063	1.00418	1.0005	0.00413	0.34431	1.00418	1.00114	0.00341	0.28437	1.00418	1.00189	0.00258	0.21482
1.00403	1.00101	0.00339	0.28231	1.00403	1.00069	0.00375	0.31237	1.00403	1.00058	0.00387	0.3228	1.00403	1.00095	0.00345	0.28781	1.00403	1.00179	0.00252	0.20966
1.00388	1.00108	0.00314	0.26199	1.00388	1.00055	0.00374	0.31161	1.00388	1.0004	0.00391	0.32547	1.00388	1.00082	0.00344	0.28656	1.00388	1.0017	0.00245	0.20398
1.00372	1.00069	0.0034	0.28366	1.00372	1.00018	0.00398	0.33132	1.00372	1.00008	0.00409	0.34101	1.00372	1.00084	0.00324	0.26985	1.00372	1.00167	0.0023	0.19185
1.00357	1.00078	0.00314	0.26143	1.00357	1.00001	0.004	0.33338	1.00357	1.00022	0.00376	0.31359	1.00357	1.00083	0.00308	0.25703	1.00357	1.00156	0.00226	0.18817
1.00342	1.0004	0.00339	0.28269	1.00342	1.00006	0.00378	0.31469	1.00342	0.99984	0.00402	0.33498	1.00342	1.00059	0.00317	0.26443	1.00342	1.00144	0.00222	0.18517
1.00327	1.00047	0.00314	0.26156	1.00327	0.99995	0.00372	0.31026	1.00327	0.99975	0.00395	0.329	1.00327	1.00032	0.00331	0.27601	1.00327	1.0013	0.00221	0.18445
1.00311	1.0001	0.00338	0.28196	1.00311	0.99963	0.00391	0.32616	1.00311	0.99974	0.00379	0.31555	1.00311	1.00004	0.00345	0.28781	1.00311	1.00114	0.00222	0.18499
1.00296	1.00016	0.00315	0.26255	1.00296	0.9994	0.00401	0.33376	1.00296	0.99934	0.00407	0.33938	1.00296	0.99987	0.00347	0.28954	1.00296	1.00088	0.00233	0.19457
1.00281	0.99983	0.00335	0.27926	1.00281	0.9994	0.00383	0.31921	1.00281	0.99941	0.00382	0.3183	1.00281	0.99984	0.00334	0.27794	1.00281	1.0007	0.00237	0.19712
1.00266	0.99982	0.00319	0.26545	1.00266	0.99938	0.00368	0.30703	1.00266	0.99917	0.00392	0.32631	1.00266	0.99979	0.00322	0.2681	1.00266	1.00054	0.00238	0.19793
1.0025	0.99956	0.00331	0.27555	1.0025	0.99909	0.00383	0.31954	1.0025	0.99892	0.00403	0.3359	1.0025	0.99968	0.00317	0.26416	1.0025	1.00027	0.00251	0.20882
1.00235	0.99949	0.00321	0.26772	1.00235	0.99879	0.004	0.33361	1.00235	0.99899	0.00377	0.31443	1.00235	0.99949	0.00321	0.26779	1.00235	1.0002	0.00241	0.20083
1.0022	0.99929	0.00327	0.27229	1.0022	0.99875	0.00387	0.32244	1.0022	0.99861	0.00403	0.33546	1.0022	0.99921	0.00336	0.27962	1.0022	1.00003	0.00243	0.20271
1.00204	0.99914	0.00326	0.27163	1.00204	0.99877	0.00368	0.30691	1.00204	0.99861	0.00385	0.3212	1.00204	0.99901	0.00341	0.28384	1.00204	0.99993	0.00237	0.19786
1.00189	0.99903	0.00322	0.26792	1.00189	0.99853	0.00378	0.31512	1.00189	0.99851	0.0038	0.31665	1.00189	0.99887	0.00339	0.28259	1.00189	0.99984	0.0023	0.19203
1.00174	0.9988	0.0033	0.27499	1.00174	0.99821	0.00397	0.33076	1.00174	0.99815	0.00403	0.33574	1.00174	0.99889	0.0032	0.26683	1.00174	0.99984	0.00214	0.1782
1.00159	0.99876	0.00317	0.26454	1.00159	0.9981	0.00391	0.32611	1.00159	0.99829	0.00371	0.30912	1.00159	0.9989	0.00302	0.252	1.00159	0.9997	0.00212	0.17675
1.00143	0.99847	0.00333	0.27718	1.00143	0.99814	0.0037	0.30843	1.00143	0.99792	0.00394	0.32867	1.00143	0.99868	0.00309	0.25754	1.00143	0.99966	0.002	0.16645
1.00128	0.99849	0.00314	0.26182	1.00128	0.99799	0.0037	0.30853	1.00128	0.99777	0.00394	0.32855	1.00128	0.99844	0.0032	0.26634	1.00128	0.99943	0.00209	0.1738
1.00113	0.99814	0.00335	0.27946	1.00113	0.99762	0.00394	0.32832	1.00113	0.99782	0.00372	0.31021	1.00113	0.99815	0.00334	0.27852	1.00113	0.99931	0.00204	0.16991
1.00098	0.99821	0.00311	0.25889	1.00098	0.99746	0.00395	0.32941	1.00098	0.99737	0.00405	0.3377	1.00098	0.99798	0.00337	0.28058	1.00098	0.99904	0.00217	0.18102
1.00082	0.99782	0.00337	0.28089	1.00082	0.99751	0.00372	0.31026	1.00082	0.99745	0.00379	0.31601	1.00082	0.99794	0.00324	0.26995	1.00082	0.99887	0.00219	0.1828
1.00067	0.99792	0.0031	0.25792	1.00067	0.99739	0.00368	0.30688	1.00067	0.99728	0.00382	0.31799	1.00067	0.99788	0.00314	0.26131	1.00067	0.99869	0.00223	0.18595
1.00052	0.99753	0.00336	0.27987	1.00052	0.99707	0.00388	0.32333	1.00052	0.99694	0.00402	0.33496	1.00052	0.99777	0.00309	0.25767	1.00052	0.99847	0.0023	0.19147
1.00037	0.99761	0.0031	0.25843	1.00037	0.99685	0.00395	0.32944	1.00037	0.99709	0.00368	0.30673	1.00037	0.99762	0.00308	0.25706	1.00037	0.99836	0.00225	0.18751
1.00021	0.99724	0.00335	0.27883	1.00021	0.99685	0.00378	0.31499	1.00021	0.99671	0.00394	0.32822	1.00021	0.99729	0.00328	0.27356	1.00021	0.99815	0.00232	0.19333
1.00006	0.99729	0.00311	0.2594	1.00006	0.99682	0.00364	0.30306	1.00006	0.99662	0.00387	0.32252	1.00006	0.99703	0.0034	0.28371	1.00006	0.99807	0.00223	0.18613
0.99991	0.99697	0.00331	0.27552	0.99991	0.99653	0.0038	0.31642	0.99991	0.99662	0.0037	0.30802	0.99991	0.99696	0.00332	0.27631	0.99991	0.99798	0.00217	0.18064
0.99976	0.99695	0.00316	0.26319	0.99976	0.99623	0.00396	0.33017	0.99976	0.9962	0.004	0.33292	0.99976	0.99695	0.00315	0.26283	0.99976	0.99796	0.00201	0.16772
0.9996	0.99669	0.00327	0.27288	0.9996	0.9962	0.00382	0.31848	0.9996	0.99627	0.00375	0.31219	0.9996	0.99693	0.003	0.24994	0.9996	0.99782	0.00201	0.16713
0.99945	0.99662	0.00318	0.26499	0.99945	0.99621	0.00364	0.30306	0.99945	0.99605	0.00382	0.31827	0.99945	0.99681	0.00297	0.2476	0.99945	0.99783	0.00182	0.15144
0.9993	0.99642	0.00324	0.26962	0.9993	0.99597	0.00374	0.31194	0.9993	0.99578	0.00395	0.32913	0.9993	0.99654	0.0031	0.25848	0.9993	0.99755	0.00196	0.16342
0.99915	0.99628	0.00322	0.26873	0.99915	0.99565	0.00392	0.32707	0.99915	0.99586	0.00369	0.30721	0.99915	0.99629	0.00321	0.26779	0.99915	0.99744	0.00191	0.15938
0.99899	0.99616	0.00318	0.26487	0.99899	0.99556	0.00386	0.32143	0.99899	0.99549	0.00393	0.32786	0.99899	0.99611	0.00324	0.26988	0.99899	0.99721	0.002	0.16691
0.99884	0.99594	0.00326	0.27199	0.99884	0.99559	0.00365	0.30434	0.99884	0.99547	0.00379	0.31581	0.99884	0.99601	0.00318	0.26499	0.99884	0.99703	0.00203	0.16927
0.99869	0.99589	0.00314	0.26184	0.99869	0.99542	0.00367	0.30574	0.99869	0.99538	0.00372	0.30965	0.99869	0.996	0.00302	0.25139	0.99869	0.99682	0.0021	0.1752
0.99854	0.99561	0.00329	0.27433	0.99854	0.99507	0.00389	0.3245	0.99854	0.99502	0.00395	0.32885	0.99854	0.9959	0.00296	0.24651	0.99854	0.99662	0.00215	0.17911
0.99838	0.9956	0.00312	0.26031	0.99838	0.99488	0.00394	0.32829	0.99838	0.99511	0.00368	0.30635	0.99838	0.99571	0.003	0.25017	0.99838	0.99646	0.00216	0.18036
0.99823	0.99527	0.00333	0.27751	0.99823	0.99494	0.0037	0.30805	0.99823	0.99477	0.00389	0.32415	0.99823	0.99541	0.00317	0.2641	0.99823	0.99625	0.00223	0.18575
0.99808	0.99534	0.00308	0.25668	0.99808	0.99483	0.00365	0.30426	0.99808	0.99462	0.00389	0.32415	0.99808	0.99511	0.00334	0.27819	0.99808	0.99617	0.00214	0.17822
0.99792	0.99495	0.00334	0.27819	0.99792	0.9945	0.00385	0.32066	0.99792	0.99466	0.00366	0.3054	0.99792	0.99503	0.00325	0.27102	0.99792	0.9961	0.00205	0.17092
0.99777	0.99504	0.00307	0.25584	0.99777	0.99429	0.00392	0.32649	0.99777	0.99422	0.00399	0.33239	0.99777	0.99498	0.00313	0.26098	0.99777	0.99604	0.00195	0.16215
0.99762	0.99466	0.00332	0.2769	0.99762	0.9943	0.00373	0.31115	0.99762	0.9943	0.00373	0.31082	0.99762	0.99498	0.00297	0.24745	0.99762	0.9959	0.00193	0.1606
0.99747	0.99473	0.00307	0.25584	0.99747	0.99425	0.00361	0.30083	0.99747	0.99413	0.00375	0.31212	0.99747	0.99486	0.00292	0.24368	0.99747	0.99594	0.00172	0.1431
0.99731	0.99436	0.00332	0.27634	0.99731	0.99397	0.00376	0.31349	0.99731	0.9938	0.00395	0.32888	0.99731	0.99461	0.00304	0.25322	0.99731	0.99567	0.00185	0.15411
0.99716	0.99442	0.00308	0.25675	0.99716	0.99367	0.00393	0.3272	0.99716	0.99395	0.00361	0.30095	0.99716	0.99439	0.00311	0.25915	0.99716	0.99554	0.00182	0.15198
0.99701	0.99409	0.00328	0.27313	0.99701	0.99365	0.00378	0.31474	0.99701	0.99357	0.00387	0.32242	0.99701	0.9942	0.00316	0.26344	0.99701	0.99535	0.00186	0.15533
0.99686	0.99408	0.00312	0.26004	0.99686	0.99366	0.00359	0.29922	0.99686	0.99347	0.00381	0.3171	0.99686	0.99406	0.00315	0.26225	0.99686	0.99516	0.00191	0.15877
0.9967	0.99382	0.00324	0.26985	0.9967	0.9934	0.00371	0.3093	0.9967	0.99348	0.00362	0.30167	0.9967	0.99409	0.00294	0.24478	0.9967	0.9949	0.00202	0.16861
0.99655	0.99375	0.00315	0.2624	0.99655	0.99309	0.00389	0.32394	0.99655	0.99305	0.00393	0.32753	0.99655	0.99405	0.00281	0.23387	0.99655	0.99473	0.00205	0.17085
0.9964	0.99355	0.0032	0.26675	0.9964	0.99301	0.00381	0.31774	0.9964	0.99313	0.00367	0.30576	0.9964	0.99384	0.00287	0.23938	0.9964	0.99458	0.00205	0.17062
0.99625	0.99341	0.00319	0.26583	0.99625	0.99303	0.00361	0.30093	0.99625	0.99291	0.00375	0.31265	0.99625	0.99355	0.00303	0.2521	0.99625	0.99443	0.00205	0.17052
0.99609	0.9933	0.00314	0.26174	0.99609	0.99286	0.00363	0.30273	0.99609	0.99265	0.00387	0.3229	0.99609	0.99328	0.00316	0.26314	0.99609	0.99431	0.00201	0.16731
0.99594	0.99306	0.00324	0.26967	0.99594	0.99251	0.00386	0.32132	0.99594	0.99273	0.00361	0.30093	0.99594	0.99311	0.00318	0.26492	0.99594	0.99427	0.00188	0.15658
0.99579	0.99302	0.00311	0.25902	0.99579	0.99234	0.00387	0.3227	0.99579	0.99236	0.00385	0.32087	0.99579	0.99309	0.00304	0.25304	0.99579	0.99417	0.00182	0.15152
0.99564	0.99273	0.00326	0.27201	0.99564	0.9924	0.00363	0.30266	0.99564	0.99232	0.00373	0.31047	0.99564	0.99304	0.00292	0.243	0.99564	0.99405	0.00179	0.1489
0.99548	0.99275	0.00307	0.25586	0.99548	0.99228	0.0036	0.29976	0.99548	0.99225	0.00363	0.30279	0.99548	0.99293	0.00287	0.23923	0.99548	0.99404	0.00163	0.13552
0.99533	0.99241	0.00328	0.27364	0.99533	0.99194	0.00381	0.31713	0.99533	0.99188	0.00387	0.32267	0.99533	0.99273	0.00292	0.24363	0.99533	0.99381	0.00171	0.14208
0.99518	0.99246	0.00305	0.25408	0.99518	0.99174	0.00387	0.32229	0.99518	0.99199	0.00358	0.29816	0.99518	0.99245	0.00306	0.25523	0.99518	0.99369	0.00167	0.13924
0.99503	0.99209	0.0033	0.27512	0.99503	0.99175	0.00368	0.30627	0.99503	0.99166	0.00378	0.3153	0.99503	0.99227	0.0031	0.25792	0.99503	0.99351	0.00171	0.14216
0.99487	0.99217	0.00303	0.25266	0.99487	0.9917	0.00356	0.29673	0.99487	0.99149	0.0038	0.31652	0.99487	0.99213	0.00308	0.25706	0.99487	0.99332	0.00175	0.14547
0.99472	0.99179	0.00329	0.27428	0.99472	0.9914	0.00373	0.31052	0.99472	0.99153	0.00358	0.29839	0.99472	0.99214	0.0029	0.24165	0.99472	0.99304	0.00189	0.15775
0.99457	0.99187	0.00304	0.25299	0.99457	0.99111	0.00388	0.32349	0.99457	0.99109	0.0039	0.32519	0.99457	0.99215	0.00271	0.22616	0.99457	0.99289	0.00189	0.15727
0.99442	0.99149	0.00329	0.27395	0.99442	0.9911	0.00373	0.31087	0.99442	0.99117	0.00365	0.3039	0.99442	0.99193	0.00279	0.2327	0.99442	0.99266	0.00197	0.16396
0.99426	0.99155	0.00305	0.25388	0.99426	0.9911	0.00355	0.29589	0.99426	0.99101	0.00366	0.30459	0.99426	0.99168	0.00291	0.24223	0.99426	0.99259	0.00188	0.15686
0.99411	0.99122	0.00325	0.27072	0.99411	0.99084	0.00367	0.30617	0.99411	0.99067	0.00386	0.32191	0.99411	0.99139	0.00305	0.25444	0.99411	0.99243	0.00188	0.15704
0.99396	0.99121	0.00309	0.25757	0.99396	0.99053	0.00385	0.32097	0.99396	0.99081	0.00353	0.29434	0.99396	0.99121	0.00309	0.25729	0.99396	0.99241	0.00173	0.1445
0.9938	0.99095	0.00321	0.26736	0.9938	0.99045	0.00377	0.31405	0.9938	0.99044	0.00378	0.31507	0.9938	0.99119	0.00294	0.24531	0.9938	0.99229	0.0017	0.14183
0.99365	0.99088	0.00312	0.25963	0.99365	0.99048	0.00357	0.2975	0.99365	0.99033	0.00373	0.31077	0.99365	0.99112	0.00285	0.23735	0.99365	0.99219	0.00164	0.13697
0.9935	0.99068	0.00317	0.2641	0.9935	0.99029	0.0036	0.30039	0.9935	0.99035	0.00354	0.2947	0.9935	0.991	0.0028	0.23364	0.9935	0.99212	0.00155	0.12906
0.99335	0.99053	0.00316	0.26337	0.99335	0.98995	0.00382	0.31835	0.99335	0.98992	0.00385	0.32122	0.99335	0.99085	0.0028	0.23341	0.99335	0.99195	0.00157	0.13097
0.99319	0.99042	0.00311	0.25955	0.99319	0.98979	0.00383	0.31898	0.99319	0.99	0.00359	0.29945	0.99319	0.99053	0.003	0.24984	0.99319	0.99187	0.00149	0.12405
0.99304	0.9902	0.0032	0.26655	0.99304	0.98985	0.00358	0.29861	0.99304	0.98978	0.00367	0.30548	0.99304	0.99028	0.0031	0.25874	0.99304	0.99166	0.00155	0.12906
0.99289	0.99015	0.00308	0.25627	0.99289	0.98973	0.00356	0.29627	0.99289	0.98949	0.00382	0.31812	0.99289	0.99019	0.00303	0.25251	0.99289	0.99147	0.00159	0.13262
0.99274	0.98986	0.00323	0.26932	0.99274	0.98938	0.00377	0.31425	0.99274	0.98959	0.00353	0.29449	0.99274	0.99019	0.00286	0.23872	0.99274	0.9912	0.00173	0.14432
0.99258	0.98987	0.00304	0.25368	0.99258	0.98918	0.00382	0.31865	0.99258	0.98923	0.00376	0.31375	0.99258	0.99017	0.00272	0.22634	0.99258	0.99106	0.00172	0.14308
0.99243	0.98954	0.00325	0.2711	0.99243	0.9892	0.00363	0.30235	0.99243	0.98917	0.00366	0.30497	0.99243	0.99004	0.00269	0.2238	0.99243	0.99076	0.00188	0.1565
0.99228	0.9896	0.00301	0.2505	0.99228	0.98914	0.00353	0.29399	0.99228	0.98912	0.00355	0.29622	0.99228	0.98978	0.0028	0.23364	0.99228	0.99075	0.00172	0.14338
0.99213	0.98922	0.00327	0.27239	0.99213	0.98884	0.00369	0.30764	0.99213	0.98874	0.0038	0.31677	0.99213	0.98952	0.00293	0.24394	0.99213	0.99058	0.00174	0.14491
0.99197	0.9893	0.003	0.25007	0.99197	0.98856	0.00384	0.32005	0.99197	0.98884	0.00352	0.29302	0.99197	0.98934	0.00296	0.24694	0.99197	0.99053	0.00162	0.13514
0.99182	0.98893	0.00325	0.27117	0.99182	0.98854	0.00368	0.30703	0.99182	0.98853	0.0037	0.30833	0.99182	0.98926	0.00288	0.23989	0.99182	0.99043	0.00156	0.13013
0.99167	0.989	0.003	0.25017	0.99167	0.98855	0.0035	0.29177	0.99167	0.98835	0.00373	0.31082	0.99167	0.98923	0.00274	0.22863	0.99167	0.99035	0.00148	0.12319
0.99152	0.98862	0.00325	0.27087	0.99152	0.98828	0.00364	0.30322	0.99152	0.9884	0.00351	0.29215	0.99152	0.98913	0.00269	0.22382	0.99152	0.99026	0.00141	0.11765
0.99136	0.98868	0.00302	0.25129	0.99136	0.98797	0.00382	0.3182	0.99136	0.98796	0.00383	0.31906	0.99136	0.98897	0.00269	0.22382	0.99136	0.9901	0.00142	0.11813
0.99121	0.98835	0.00321	0.26759	0.99121	0.9879	0.00372	0.31021	0.99121	0.98803	0.00357	0.29785	0.99121	0.98867	0.00286	0.23804	0.99121	0.99003	0.00133	0.11055
0.99106	0.98835	0.00304	0.25337	0.99106	0.98795	0.0035	0.29137	0.99106	0.9879	0.00355	0.29574	0.99106	0.98839	0.00299	0.2494	0.99106	0.98984	0.00136	0.11368
0.99091	0.98809	0.00316	0.26354	0.99091	0.98774	0.00355	0.2961	0.99091	0.98756	0.00376	0.31349	0.99091	0.98832	0.0029	0.24206	0.99091	0.98963	0.00143	0.11909
0.99075	0.98801	0.00308	0.25642	0.99075	0.9874	0.00377	0.3142	0.99075	0.9877	0.00343	0.28562	0.99075	0.98828	0.00278	0.23178	0.99075	0.98939	0.00153	0.12733
0.9906	0.98781	0.00313	0.26095	0.9906	0.98725	0.00377	0.31398	0.9906	0.98732	0.00368	0.30696	0.9906	0.98826	0.00263	0.21886	0.9906	0.98925	0.00152	0.12627
0.99045	0.98767	0.00312	0.26037	0.99045	0.9873	0.00353	0.29429	0.99045	0.9872	0.00365	0.30411	0.99045	0.98815	0.00259	0.21563	0.99045	0.98893	0.0017	0.14196
0.9903	0.98756	0.00307	0.25625	0.9903	0.98717	0.00351	0.29226	0.9903	0.98723	0.00345	0.28717	0.9903	0.98787	0.00272	0.22669	0.9903	0.98892	0.00154	0.12871
0.99014	0.98733	0.00316	0.2637	0.99014	0.98682	0.00374	0.31128	0.99014	0.98678	0.00378	0.31494	0.99014	0.98765	0.0028	0.23351	0.99014	0.98875	0.00157	0.13077
0.98999	0.98728	0.00304	0.25352	0.98999	0.98662	0.00378	0.31514	0.98999	0.98686	0.00352	0.29315	0.98999	0.98746	0.00284	0.23674	0.98999	0.98866	0.00149	0.12413
0.98984	0.98699	0.0032	0.26627	0.98984	0.98666	0.00357	0.29772	0.98984	0.98665	0.00358	0.29818	0.98984	0.98732	0.00283	0.23554	0.98984	0.98857	0.00142	0.11869
0.98969	0.98701	0.003	0.2504	0.98969	0.98658	0.00349	0.29065	0.98969	0.98636	0.00374	0.31133	0.98969	0.98735	0.00263	0.21894	0.98969	0.98853	0.0013	0.10796
0.98953	0.98667	0.00322	0.26825	0.98953	0.98627	0.00366	0.30533	0.98953	0.98647	0.00345	0.28717	0.98953	0.9873	0.00251	0.20877	0.98953	0.98842	0.00125	0.10401
0.98938	0.98673	0.00298	0.24811	0.98938	0.986	0.0038	0.31652	0.98938	0.9861	0.00369	0.30757	0.98938	0.9871	0.00256	0.21357	0.98938	0.98829	0.00123	0.10228
0.98923	0.98635	0.00324	0.26967	0.98923	0.98599	0.00364	0.30337	0.98923	0.98603	0.00359	0.2992	0.98923	0.9868	0.00273	0.22751	0.98923	0.98816	0.0012	0.09992
0.98907	0.98643	0.00297	0.24742	0.98907	0.98599	0.00347	0.28893	0.98907	0.98599	0.00347	0.2891	0.98907	0.98652	0.00286	0.23875	0.98907	0.98798	0.00123	0.10267
0.98892	0.98605	0.00322	0.26848	0.98892	0.98572	0.0036	0.30009	0.98892	0.98562	0.00371	0.3094	0.98892	0.98637	0.00287	0.23913	0.98892	0.98774	0.00132	0.11037
0.98877	0.98612	0.00297	0.2477	0.98877	0.9854	0.00379	0.31565	0.98877	0.9857	0.00345	0.2877	0.98877	0.98633	0.00274	0.22827	0.98877	0.98755	0.00137	0.11452
0.98862	0.98575	0.00322	0.268	0.98862	0.98535	0.00367	0.30584	0.98862	0.9854	0.00362	0.30141	0.98862	0.9863	0.0026	0.21683	0.98862	0.98739	0.00138	0.1149
0.98846	0.98581	0.00299	0.24897	0.98846	0.98536	0.00349	0.29045	0.98846	0.9852	0.00366	0.30538	0.98846	0.98617	0.00257	0.21436	0.98846	0.98709	0.00154	0.1285
0.98831	0.98548	0.00318	0.26538	0.98831	0.98516	0.00355	0.29551	0.98831	0.98525	0.00344	0.28643	0.98831	0.98597	0.00264	0.21973	0.98831	0.98705	0.00142	0.11841
0.98816	0.98547	0.00303	0.25213	0.98816	0.98482	0.00375	0.31247	0.98816	0.98482	0.00375	0.3127	0.98816	0.9857	0.00276	0.23031	0.98816	0.98688	0.00144	0.11981
0.98801	0.98521	0.00314	0.26197	0.98801	0.98468	0.00373	0.31102	0.98801	0.98489	0.0035	0.29205	0.98801	0.98551	0.00281	0.23399	0.98801	0.98677	0.00139	0.11607
0.98785	0.98514	0.00305	0.25434	0.98785	0.98474	0.0035	0.29157	0.98785	0.98474	0.0035	0.29185	0.98785	0.98536	0.0028	0.23348	0.98785	0.98667	0.00132	0.1104
0.9877	0.98494	0.00311	0.25892	0.9877	0.98461	0.00347	0.28956	0.9877	0.9844	0.00371	0.30932	0.9877	0.98538	0.0026	0.21695	0.9877	0.98666	0.00116	0.09707
0.98755	0.9848	0.00309	0.25785	0.98755	0.98425	0.00371	0.30884	0.98755	0.98454	0.00338	0.28163	0.98755	0.98539	0.00243	0.20228	0.98755	0.98653	0.00114	0.09516
0.9874	0.98468	0.00305	0.25414	0.9874	0.98407	0.00374	0.31136	0.9874	0.98417	0.00363	0.30217	0.9874	0.98516	0.00251	0.20912	0.9874	0.98645	0.00106	0.0887
0.98724	0.98445	0.00314	0.26141	0.98724	0.9841	0.00353	0.29434	0.98724	0.98404	0.0036	0.29994	0.98724	0.98491	0.00262	0.21871	0.98724	0.98626	0.00111	0.09219
0.98709	0.98441	0.00301	0.25088	0.98709	0.98401	0.00346	0.28826	0.98709	0.98408	0.00338	0.28196	0.98709	0.98462	0.00278	0.2314	0.98709	0.98612	0.00109	0.09102
0.98694	0.98412	0.00317	0.26403	0.98694	0.9837	0.00363	0.30279	0.98694	0.98363	0.00372	0.30963	0.98694	0.98444	0.0028	0.23371	0.98694	0.98585	0.00122	0.10147
0.98679	0.98414	0.00297	0.24783	0.98679	0.98344	0.00376	0.31339	0.98679	0.98371	0.00345	0.28788	0.98679	0.98442	0.00266	0.22196	0.98679	0.98568	0.00124	0.1032
0.98663	0.98379	0.00319	0.26591	0.98663	0.98343	0.0036	0.30001	0.98663	0.98351	0.00351	0.29274	0.98663	0.98435	0.00257	0.21403	0.98663	0.98551	0.00127	0.10554
0.98648	0.98386	0.00295	0.24584	0.98648	0.98343	0.00343	0.2859	0.98648	0.9832	0.00368	0.30701	0.98648	0.98424	0.00252	0.20966	0.98648	0.98527	0.00136	0.11302
0.98633	0.98347	0.00321	0.26744	0.98633	0.98316	0.00356	0.29706	0.98633	0.98333	0.00337	0.28109	0.98633	0.98408	0.00252	0.21029	0.98633	0.98516	0.00131	0.10913
0.98618	0.98356	0.00294	0.24511	0.98618	0.98284	0.00375	0.31278	0.98618	0.98295	0.00362	0.30202	0.98618	0.98375	0.00273	0.22725	0.98618	0.98497	0.00136	0.11332
0.98602	0.98318	0.00319	0.26622	0.98602	0.98279	0.00363	0.30268	0.98602	0.98288	0.00354	0.2947	0.98602	0.98352	0.00281	0.2345	0.98602	0.98488	0.00128	0.10707
0.98587	0.98325	0.00294	0.24506	0.98587	0.9828	0.00345	0.28714	0.98587	0.98284	0.00341	0.28386	0.98587	0.98342	0.00276	0.2299	0.98587	0.98478	0.00122	0.10188
0.98572	0.98288	0.00319	0.26563	0.98572	0.9826	0.00351	0.29228	0.98572	0.98246	0.00366	0.30487	0.98572	0.98341	0.00259	0.21573	0.98572	0.98478	0.00105	0.08766
0.98557	0.98294	0.00296	0.24625	0.98557	0.98226	0.00371	0.3095	0.98557	0.98253	0.00341	0.28389	0.98557	0.9834	0.00243	0.20228	0.98557	0.98462	0.00106	0.08832
0.98541	0.98261	0.00315	0.26268	0.98541	0.98213	0.00369	0.3078	0.98541	0.98226	0.00354	0.29538	0.98541	0.98325	0.00242	0.20205	0.98541	0.98462	0.000890198	0.07418
0.98526	0.9826	0.00299	0.24951	0.98526	0.98218	0.00346	0.28793	0.98526	0.98204	0.00361	0.30108	0.98526	0.983	0.00254	0.21146	0.98526	0.98436	0.00101	0.08436
0.98511	0.98234	0.00311	0.25922	0.98511	0.98205	0.00343	0.2862	0.98511	0.98211	0.00337	0.28089	0.98511	0.98273	0.00267	0.22255	0.98511	0.98425	0.000968933	0.08074
0.98495	0.98227	0.00302	0.25174	0.98495	0.98168	0.00368	0.3066	0.98495	0.98168	0.00368	0.30642	0.98495	0.98256	0.00269	0.22436	0.98495	0.98398	0.0011	0.09132
0.9848	0.98206	0.00308	0.25655	0.9848	0.98151	0.0037	0.30866	0.9848	0.98174	0.00344	0.28702	0.9848	0.98248	0.00261	0.21741	0.9848	0.9838	0.00112	0.09349
0.98465	0.98192	0.00307	0.25558	0.98465	0.98154	0.0035	0.29144	0.98465	0.98159	0.00344	0.28641	0.98465	0.98244	0.00248	0.20681	0.98465	0.9836	0.00118	0.09822
0.9845	0.98181	0.00302	0.25157	0.9845	0.98145	0.00343	0.28567	0.9845	0.98126	0.00364	0.30322	0.9845	0.98234	0.00243	0.20243	0.9845	0.9834	0.00123	0.10244
0.98434	0.98158	0.00311	0.25881	0.98434	0.98113	0.00361	0.30116	0.98434	0.9814	0.00331	0.27608	0.98434	0.98218	0.00243	0.20269	0.98434	0.98327	0.0012	0.1002
0.98419	0.98154	0.00298	0.24872	0.98419	0.98088	0.00372	0.31006	0.98419	0.98102	0.00356	0.29683	0.98419	0.98187	0.00261	0.21774	0.98419	0.98305	0.00128	0.10681
0.98404	0.98125	0.00314	0.26154	0.98404	0.98087	0.00356	0.29633	0.98404	0.98089	0.00354	0.2948	0.98404	0.98156	0.00278	0.23201	0.98404	0.98298	0.00119	0.09893
0.98389	0.98126	0.00295	0.24554	0.98389	0.98087	0.0034	0.28292	0.98389	0.98092	0.00333	0.2774	0.98389	0.98151	0.00268	0.22301	0.98389	0.9829	0.00111	0.0926
0.98373	0.98092	0.00316	0.26332	0.98373	0.98059	0.00354	0.29462	0.98373	0.98048	0.00365	0.30454	0.98373	0.98147	0.00255	0.2124	0.98373	0.98286	0.000977173	0.08143
0.98358	0.98098	0.00292	0.2434	0.98358	0.98027	0.00372	0.30973	0.98358	0.98056	0.0034	0.28313	0.98358	0.98145	0.00239	0.19948	0.98358	0.98271	0.000982666	0.08189
0.98343	0.9806	0.00318	0.26494	0.98343	0.98023	0.00359	0.29925	0.98343	0.98036	0.00345	0.28758	0.98343	0.98134	0.00235	0.19602	0.98343	0.98274	0.000779724	0.06498
0.98328	0.98069	0.00291	0.24259	0.98328	0.98024	0.00341	0.28389	0.98328	0.98006	0.00362	0.30126	0.98328	0.98106	0.00249	0.20719	0.98328	0.98245	0.000927124	0.07726
0.98312	0.98031	0.00317	0.26382	0.98312	0.98002	0.00349	0.29045	0.98312	0.98018	0.00331	0.2757	0.98312	0.98084	0.00256	0.21347	0.98312	0.98234	0.000882263	0.07352
0.98297	0.98038	0.00291	0.24267	0.98297	0.9797	0.00368	0.30657	0.98297	0.9798	0.00356	0.29706	0.98297	0.98066	0.0026	0.21678	0.98297	0.98212	0.000953674	0.07947
0.98282	0.98001	0.00316	0.26311	0.98282	0.97957	0.00365	0.30375	0.98282	0.97972	0.00348	0.29007	0.98282	0.98052	0.00258	0.2151	0.98282	0.98193	0.001	0.08357
0.98267	0.98006	0.00293	0.24401	0.98267	0.97962	0.00342	0.28488	0.98267	0.9797	0.00334	0.27796	0.98267	0.98054	0.00239	0.19882	0.98267	0.98169	0.0011	0.09132
0.98251	0.97973	0.00312	0.26024	0.98251	0.97948	0.00341	0.28409	0.98251	0.97932	0.00359	0.29915	0.98251	0.98048	0.00228	0.19015	0.98251	0.98151	0.00113	0.09438
0.98236	0.97972	0.00297	0.24755	0.98236	0.97912	0.00364	0.30368	0.98236	0.97938	0.00335	0.27954	0.98236	0.98029	0.00233	0.19419	0.98236	0.98137	0.00112	0.09303
0.98221	0.97946	0.00309	0.25721	0.98221	0.97894	0.00367	0.30612	0.98221	0.97912	0.00347	0.28923	0.98221	0.97999	0.00249	0.20747	0.98221	0.98118	0.00115	0.09603
0.98206	0.97939	0.00299	0.24935	0.98206	0.97898	0.00345	0.2876	0.98206	0.97889	0.00356	0.29627	0.98206	0.97971	0.00264	0.21962	0.98206	0.98108	0.0011	0.09137
0.9819	0.97919	0.00305	0.25388	0.9819	0.97888	0.00339	0.28272	0.9819	0.97896	0.00331	0.27562	0.9819	0.97956	0.00263	0.21914	0.9819	0.98103	0.000985413	0.08212
0.98175	0.97905	0.00304	0.25312	0.98175	0.97856	0.00358	0.29861	0.98175	0.97855	0.0036	0.29963	0.98175	0.97953	0.0025	0.20828	0.98175	0.98094	0.000908508	0.07571
0.9816	0.97894	0.00299	0.24907	0.9816	0.97832	0.00368	0.30696	0.9816	0.97858	0.00339	0.28229	0.9816	0.9795	0.00236	0.19625	0.9816	0.98081	0.00088501	0.07375
0.98145	0.97871	0.00308	0.25658	0.98145	0.97832	0.00351	0.29271	0.98145	0.97845	0.00336	0.28025	0.98145	0.97938	0.00233	0.19384	0.98145	0.98081	0.000710144	0.05918
0.98129	0.97866	0.00295	0.2462	0.98129	0.9783	0.00336	0.2802	0.98129	0.9781	0.00358	0.29856	0.98129	0.97916	0.0024	0.20009	0.98129	0.98056	0.000819397	0.06828
0.98114	0.97837	0.00311	0.25909	0.98114	0.97801	0.00351	0.29271	0.98114	0.97825	0.00325	0.27074	0.98114	0.9789	0.00251	0.20945	0.98114	0.98043	0.000792847	0.06607
0.98099	0.97839	0.00292	0.2433	0.98099	0.9777	0.00369	0.30741	0.98099	0.97787	0.0035	0.29182	0.98099	0.97871	0.00256	0.21304	0.98099	0.98025	0.000826416	0.06887
0.98083	0.97805	0.00313	0.26108	0.98083	0.97768	0.00355	0.29577	0.98083	0.97774	0.00348	0.28979	0.98083	0.97857	0.00255	0.21233	0.98083	0.98006	0.000870667	0.07256
0.98068	0.97811	0.00289	0.24101	0.98068	0.97769	0.00337	0.28048	0.98068	0.97777	0.00327	0.27237	0.98068	0.97859	0.00235	0.19608	0.98068	0.97979	0.00101	0.08382
0.98053	0.97773	0.00315	0.26255	0.98053	0.97746	0.00345	0.28786	0.98053	0.97733	0.00359	0.29953	0.98053	0.97859	0.00218	0.18178	0.98053	0.97963	0.00102	0.08458
0.98038	0.97781	0.00288	0.2402	0.98038	0.97713	0.00364	0.30362	0.98038	0.97741	0.00334	0.27802	0.98038	0.97835	0.00227	0.18944	0.98038	0.97943	0.00106	0.08825
0.98022	0.97743	0.00314	0.26169	0.98022	0.97702	0.0036	0.29984	0.98022	0.97722	0.00338	0.28175	0.98022	0.9781	0.00239	0.19903	0.98022	0.97931	0.00102	0.08525
0.98007	0.9775	0.00289	0.24063	0.98007	0.97706	0.00339	0.28219	0.98007	0.9769	0.00357	0.29724	0.98007	0.97781	0.00254	0.21136	0.98007	0.97917	0.00101	0.08446
0.97992	0.97714	0.00313	0.26062	0.97992	0.97691	0.00338	0.2816	0.97992	0.97704	0.00324	0.26967	0.97992	0.97762	0.00258	0.21492	0.97992	0.97914	0.000876465	0.07304
0.97977	0.97719	0.0029	0.24155	0.97977	0.97655	0.00361	0.30101	0.97977	0.97666	0.0035	0.29137	0.97977	0.97761	0.00242	0.20175	0.97977	0.97903	0.000825195	0.06877
0.97961	0.97686	0.0031	0.25818	0.97961	0.97638	0.00363	0.30291	0.97961	0.97657	0.00342	0.28496	0.97961	0.97754	0.00234	0.1946	0.97961	0.97891	0.00078949	0.06579
0.97946	0.97684	0.00294	0.24516	0.97946	0.97642	0.00341	0.2844	0.97946	0.97655	0.00327	0.27222	0.97946	0.97743	0.00229	0.19061	0.97946	0.97887	0.000661621	0.05514
0.97931	0.97658	0.00306	0.25518	0.97931	0.97632	0.00336	0.28028	0.97931	0.97616	0.00354	0.29495	0.97931	0.97726	0.0023	0.19152	0.97931	0.97867	0.000713806	0.05948
0.97916	0.97652	0.00296	0.24684	0.97916	0.97599	0.00355	0.2961	0.97916	0.97622	0.0033	0.27509	0.97916	0.97694	0.00249	0.20727	0.97916	0.97857	0.000658875	0.05491
0.979	0.97632	0.00302	0.25141	0.979	0.97576	0.00364	0.3037	0.979	0.97598	0.0034	0.28348	0.979	0.97672	0.00257	0.21403	0.979	0.97838	0.000703125	0.05859
0.97885	0.97616	0.00302	0.25202	0.97885	0.97575	0.00349	0.29048	0.97885	0.97572	0.00352	0.29325	0.97885	0.9766	0.00253	0.21072	0.97885	0.97816	0.00077301	0.06442
0.9787	0.97606	0.00297	0.24747	0.9787	0.97573	0.00334	0.27812	0.9787	0.97579	0.00327	0.27219	0.9787	0.9766	0.00236	0.1963	0.9787	0.97788	0.000921936	0.07683
0.97855	0.97582	0.00306	0.25482	0.97855	0.97544	0.00349	0.29063	0.97855	0.9754	0.00354	0.295	0.97855	0.97658	0.00221	0.18382	0.97855	0.97774	0.000905457	0.07545
0.97839	0.97579	0.00293	0.24401	0.97839	0.97514	0.00366	0.30477	0.97839	0.97542	0.00334	0.2785	0.97839	0.97643	0.00221	0.18389	0.97839	0.97747	0.00104	0.08664
0.97824	0.97549	0.00309	0.25714	0.97824	0.97511	0.00351	0.29279	0.97824	0.9753	0.00331	0.2757	0.97824	0.97617	0.00232	0.19371	0.97824	0.97742	0.00092041	0.0767
0.97809	0.97551	0.00289	0.24111	0.97809	0.97513	0.00333	0.27743	0.97809	0.97495	0.00353	0.29381	0.97809	0.9759	0.00246	0.20528	0.97809	0.97725	0.000937805	0.07815
0.97794	0.97517	0.00311	0.25925	0.97794	0.97488	0.00343	0.28595	0.97794	0.97509	0.0032	0.26662	0.97794	0.97572	0.00249	0.20714	0.97794	0.97723	0.00079071	0.06589
0.97778	0.97524	0.00286	0.23849	0.97778	0.97457	0.00362	0.30128	0.97778	0.97472	0.00344	0.28643	0.97778	0.97566	0.00239	0.19877	0.97778	0.97712	0.000748291	0.06236
0.97763	0.97485	0.00312	0.26026	0.97763	0.97447	0.00356	0.29638	0.97763	0.97458	0.00343	0.28549	0.97763	0.97561	0.00227	0.18923	0.97763	0.97702	0.000684509	0.05704
0.97748	0.97494	0.00286	0.23801	0.97748	0.9745	0.00335	0.27893	0.97748	0.97462	0.00321	0.26774	0.97748	0.97551	0.00222	0.18473	0.97748	0.97694	0.000610046	0.05084
0.97733	0.97456	0.00311	0.25927	0.97733	0.97434	0.00335	0.27931	0.97733	0.97417	0.00354	0.29538	0.97733	0.97535	0.00222	0.18489	0.97733	0.97677	0.000622559	0.05188
0.97717	0.97463	0.00285	0.23788	0.97717	0.97398	0.00359	0.29897	0.97717	0.97425	0.00329	0.2739	0.97717	0.97504	0.0024	0.19976	0.97717	0.9767	0.000532227	0.04435
0.97702	0.97426	0.0031	0.25848	0.97702	0.97381	0.00361	0.3006	0.97702	0.97407	0.00332	0.27659	0.97702	0.97474	0.00256	0.21347	0.97702	0.97648	0.000607605	0.05063
0.97687	0.97431	0.00287	0.23941	0.97687	0.97387	0.00337	0.28099	0.97687	0.97374	0.00351	0.29261	0.97687	0.97469	0.00245	0.20404	0.97687	0.97628	0.000657654	0.0548
0.97672	0.97399	0.00307	0.25548	0.97672	0.97375	0.00333	0.27738	0.97672	0.97388	0.00318	0.26532	0.97672	0.97466	0.00231	0.19277	0.97672	0.97601	0.000788879	0.06574
0.97656	0.97397	0.00292	0.24292	0.97656	0.97342	0.00353	0.29404	0.97656	0.97351	0.00343	0.28618	0.97656	0.97463	0.00217	0.18079	0.97656	0.97588	0.000771179	0.06426
0.97641	0.9737	0.00304	0.25327	0.97641	0.97318	0.00363	0.30235	0.97641	0.9734	0.00338	0.28201	0.97641	0.97451	0.00214	0.17802	0.97641	0.97555	0.000970459	0.08087
0.97626	0.97363	0.00295	0.24592	0.97626	0.97319	0.00344	0.28694	0.97626	0.97339	0.00322	0.2685	0.97626	0.97423	0.00228	0.1899	0.97626	0.97554	0.000808716	0.06739
0.9761	0.97344	0.00299	0.2493	0.9761	0.97317	0.0033	0.27517	0.9761	0.97299	0.0035	0.29149	0.9761	0.974	0.00236	0.19661	0.9761	0.97537	0.000830383	0.0692
0.97595	0.97329	0.00299	0.24948	0.97595	0.97288	0.00346	0.28798	0.97595	0.97305	0.00326	0.2714	0.97595	0.97382	0.0024	0.20002	0.97595	0.97531	0.000726929	0.06058
0.9758	0.97319	0.00293	0.24437	0.9758	0.97257	0.00362	0.30197	0.9758	0.97283	0.00334	0.27827	0.9758	0.97369	0.00237	0.19788	0.9758	0.9752	0.000671692	0.05597
0.97565	0.97295	0.00303	0.25271	0.97565	0.97255	0.00348	0.29017	0.97565	0.97258	0.00345	0.28763	0.97565	0.9737	0.00218	0.18191	0.97565	0.97514	0.000570679	0.04756
0.97549	0.97292	0.00289	0.24124	0.97549	0.97256	0.0033	0.27489	0.97549	0.97264	0.00321	0.26738	0.97549	0.97363	0.00209	0.1742	0.97549	0.97504	0.000509033	0.04242
0.97534	0.97262	0.00306	0.255	0.97534	0.97231	0.0034	0.28358	0.97534	0.97226	0.00346	0.28824	0.97534	0.97345	0.00212	0.17698	0.97534	0.97488	0.000517578	0.04313
0.97519	0.97264	0.00286	0.23862	0.97519	0.972	0.00359	0.29889	0.97519	0.97226	0.00329	0.274	0.97519	0.97315	0.00229	0.19084	0.97519	0.9748	0.000433044	0.03609
0.97504	0.97229	0.00308	0.25683	0.97504	0.9719	0.00352	0.2935	0.97504	0.97216	0.00323	0.26939	0.97504	0.97287	0.00243	0.20259	0.97504	0.97459	0.000497131	0.04143
0.97488	0.97236	0.00283	0.23608	0.97488	0.97193	0.00331	0.27621	0.97488	0.9718	0.00346	0.28867	0.97488	0.97273	0.00242	0.20126	0.97488	0.97437	0.000582581	0.04855
0.97473	0.97198	0.00309	0.2577	0.97473	0.97177	0.00332	0.27705	0.97473	0.97194	0.00314	0.26179	0.97473	0.9727	0.00228	0.19015	0.97473	0.97416	0.000643005	0.05358
0.97458	0.97206	0.00283	0.236	0.97458	0.97141	0.00356	0.29645	0.97458	0.97157	0.00338	0.28198	0.97458	0.97268	0.00214	0.17812	0.97458	0.97401	0.000644531	0.05371
0.97443	0.97168	0.00308	0.25698	0.97443	0.97125	0.00357	0.2978	0.97443	0.97143	0.00337	0.28097	0.97443	0.97255	0.0021	0.17527	0.97443	0.97369	0.000829468	0.06912
0.97427	0.97175	0.00283	0.23595	0.97427	0.97131	0.00333	0.27791	0.97427	0.97146	0.00316	0.26347	0.97427	0.97232	0.00219	0.18252	0.97427	0.97367	0.000679932	0.05666
0.97412	0.97138	0.00308	0.2563	0.97412	0.97119	0.0033	0.27461	0.97412	0.97102	0.00349	0.29081	0.97412	0.97208	0.0023	0.19145	0.97412	0.9735	0.000695496	0.05796
0.97397	0.97143	0.00285	0.23768	0.97397	0.97085	0.0035	0.29208	0.97397	0.97109	0.00323	0.26914	0.97397	0.97188	0.00234	0.19531	0.97397	0.9734	0.000639954	0.05333
0.97382	0.97111	0.00304	0.25314	0.97382	0.97064	0.00357	0.2976	0.97382	0.97092	0.00325	0.27107	0.97382	0.97174	0.00233	0.19422	0.97382	0.9733	0.000577393	0.04812
0.97366	0.97109	0.00289	0.24104	0.97366	0.97065	0.00339	0.28259	0.97366	0.97059	0.00346	0.28798	0.97366	0.97176	0.00214	0.17799	0.97366	0.97328	0.000427246	0.0356
0.97351	0.97084	0.003	0.25007	0.97351	0.97061	0.00326	0.27176	0.97351	0.97073	0.00312	0.26006	0.97351	0.97176	0.00197	0.16398	0.97351	0.97316	0.000394287	0.03286
0.97336	0.97076	0.00292	0.2434	0.97336	0.97031	0.00342	0.28536	0.97336	0.97035	0.00338	0.2813	0.97336	0.97152	0.00206	0.17174	0.97336	0.97303	0.000367737	0.03064
0.97321	0.97058	0.00295	0.24618	0.97321	0.97001	0.00359	0.29889	0.97321	0.97026	0.00331	0.27583	0.97321	0.97126	0.00219	0.18255	0.97321	0.97289	0.000357971	0.02983
0.97305	0.97041	0.00297	0.24734	0.97305	0.96999	0.00344	0.28684	0.97305	0.97026	0.00314	0.26174	0.97305	0.97098	0.00233	0.19417	0.97305	0.97273	0.000361023	0.03009
0.9729	0.97032	0.0029	0.24165	0.9729	0.97001	0.00325	0.27092	0.9729	0.96984	0.00344	0.28656	0.9729	0.97079	0.00237	0.19737	0.9729	0.97247	0.000484314	0.04036
0.97275	0.97007	0.00301	0.25045	0.97275	0.96975	0.00337	0.28094	0.97275	0.96991	0.00319	0.26586	0.97275	0.97077	0.00222	0.18481	0.97275	0.97229	0.000517578	0.04313
0.9726	0.97004	0.00287	0.23893	0.9726	0.96943	0.00356	0.29635	0.9726	0.96969	0.00327	0.27234	0.9726	0.97071	0.00212	0.17649	0.9726	0.97211	0.000540771	0.04506
0.97244	0.96974	0.00304	0.25304	0.97244	0.96935	0.00348	0.28982	0.97244	0.96942	0.00339	0.28277	0.97244	0.9706	0.00207	0.17255	0.97244	0.97185	0.000664978	0.05541
0.97229	0.96977	0.00283	0.2358	0.97229	0.96937	0.00328	0.27316	0.97229	0.9695	0.00314	0.26156	0.97229	0.97043	0.00209	0.17433	0.97229	0.97178	0.000573425	0.04779
0.97214	0.96942	0.00306	0.25485	0.97214	0.9692	0.0033	0.27476	0.97214	0.96912	0.00339	0.28211	0.97214	0.97011	0.00228	0.18974	0.97214	0.9716	0.000604248	0.05035
0.97198	0.96949	0.00281	0.23379	0.97198	0.96885	0.00352	0.29353	0.97198	0.96911	0.00323	0.26957	0.97198	0.9699	0.00235	0.19562	0.97198	0.97149	0.000552368	0.04603
0.97183	0.9691	0.00307	0.25564	0.97183	0.96868	0.00354	0.29508	0.97183	0.96902	0.00316	0.26342	0.97183	0.96978	0.0023	0.19193	0.97183	0.9714	0.000485535	0.04046
0.97168	0.96918	0.0028	0.23369	0.97168	0.96875	0.0033	0.27476	0.97168	0.96865	0.0034	0.2833	0.97168	0.96978	0.00213	0.17769	0.97168	0.9714	0.000317993	0.0265
0.97153	0.9688	0.00306	0.255	0.97153	0.96862	0.00327	0.27255	0.97153	0.96878	0.00309	0.25764	0.97153	0.96977	0.00197	0.16413	0.97153	0.97125	0.000309143	0.02576
0.97137	0.96888	0.00281	0.23397	0.97137	0.96828	0.00348	0.28961	0.97137	0.96842	0.00332	0.27641	0.97137	0.96961	0.00199	0.16553	0.97137	0.9712	0.0002005	0.01671
0.97122	0.96851	0.00304	0.25363	0.97122	0.96807	0.00354	0.29477	0.97122	0.96826	0.00333	0.2773	0.97122	0.96935	0.0021	0.17517	0.97122	0.97097	0.000284424	0.0237
0.97107	0.96855	0.00283	0.23554	0.97107	0.96809	0.00335	0.27936	0.97107	0.9683	0.00311	0.25902	0.97107	0.96907	0.00225	0.18735	0.97107	0.97085	0.000244141	0.02035
0.97092	0.96824	0.003	0.25037	0.97092	0.96804	0.00323	0.26932	0.97092	0.96786	0.00343	0.28615	0.97092	0.9689	0.00227	0.18926	0.97092	0.97058	0.000378418	0.03153
0.97076	0.96821	0.00286	0.2387	0.97076	0.96774	0.0034	0.28305	0.97076	0.96794	0.00318	0.26489	0.97076	0.96884	0.00216	0.17993	0.97076	0.97041	0.000401611	0.03347
0.97061	0.96797	0.00297	0.24757	0.97061	0.96745	0.00356	0.29627	0.97061	0.96777	0.0032	0.26637	0.97061	0.96878	0.00206	0.17133	0.97061	0.97022	0.000445251	0.0371
0.97046	0.96788	0.00289	0.24104	0.97046	0.96743	0.0034	0.28351	0.97046	0.96743	0.0034	0.28318	0.97046	0.96868	0.002	0.16696	0.97046	0.97	0.000518799	0.04323
0.97031	0.96771	0.00292	0.2434	0.97031	0.96744	0.00322	0.26855	0.97031	0.96758	0.00307	0.25553	0.97031	0.96852	0.00201	0.16708	0.97031	0.96988	0.000480347	0.04003
0.97015	0.96753	0.00295	0.24572	0.97015	0.96717	0.00335	0.27901	0.97015	0.9672	0.00332	0.27649	0.97015	0.96821	0.00219	0.18244	0.97015	0.96967	0.000546875	0.04557
0.97	0.96745	0.00287	0.23921	0.97	0.96687	0.00352	0.29358	0.97	0.96709	0.00327	0.27214	0.97	0.96791	0.00235	0.19613	0.97	0.96959	0.00045929	0.03827
0.96985	0.9672	0.00298	0.24836	0.96985	0.96679	0.00344	0.28661	0.96985	0.96711	0.00308	0.25653	0.96985	0.96785	0.00224	0.187	0.96985	0.96949	0.000400696	0.03339
0.9697	0.96718	0.00283	0.23595	0.9697	0.96681	0.00324	0.27036	0.9697	0.96668	0.00339	0.28277	0.9697	0.96783	0.0021	0.17464	0.9697	0.96947	0.000251465	0.02096
0.96954	0.96687	0.00301	0.25063	0.96954	0.96663	0.00328	0.27308	0.96954	0.96676	0.00313	0.26095	0.96954	0.9678	0.00195	0.16281	0.96954	0.96932	0.000249329	0.02078
0.96939	0.9669	0.0028	0.23328	0.96939	0.96628	0.00349	0.29119	0.96939	0.96654	0.0032	0.26708	0.96939	0.96769	0.00191	0.15912	0.96939	0.96934	5.85937e-05	0.00488
0.96924	0.96654	0.00304	0.25299	0.96924	0.96612	0.0035	0.29195	0.96924	0.96626	0.00335	0.27883	0.96924	0.96742	0.00204	0.17006	0.96924	0.96906	0.000204163	0.01701
0.96909	0.96663	0.00276	0.22985	0.96909	0.96621	0.00323	0.26947	0.96909	0.96638	0.00305	0.25375	0.96909	0.96721	0.00211	0.17548	0.96909	0.96898	0.000117798	0.00982
0.96893	0.96624	0.00303	0.25248	0.96893	0.96607	0.00321	0.26784	0.96893	0.96601	0.00329	0.27395	0.96893	0.96703	0.00214	0.17848	0.96893	0.96873	0.000222778	0.01856
0.96878	0.96632	0.00277	0.23074	0.96878	0.96573	0.00343	0.28585	0.96878	0.96597	0.00316	0.26357	0.96878	0.9669	0.00211	0.17614	0.96878	0.96855	0.000263672	0.02197
0.96863	0.96593	0.00303	0.25248	0.96863	0.96552	0.00349	0.29065	0.96863	0.96589	0.00308	0.25673	0.96863	0.96691	0.00193	0.1608	0.96863	0.96832	0.000344238	0.02869
0.96848	0.966	0.00278	0.23135	0.96848	0.96553	0.00331	0.27552	0.96848	0.96551	0.00333	0.27725	0.96848	0.96682	0.00186	0.15462	0.96848	0.96813	0.000386963	0.03225
0.96832	0.96564	0.00301	0.25103	0.96832	0.96548	0.00319	0.26619	0.96832	0.96562	0.00303	0.25286	0.96832	0.96665	0.00188	0.15668	0.96832	0.96799	0.000377808	0.03148
0.96817	0.96568	0.0028	0.23354	0.96817	0.96518	0.00336	0.2802	0.96817	0.96529	0.00324	0.27011	0.96817	0.96635	0.00204	0.17042	0.96817	0.96778	0.000440369	0.0367
0.96802	0.96538	0.00297	0.24719	0.96802	0.96489	0.00351	0.29259	0.96802	0.96512	0.00326	0.27168	0.96802	0.96605	0.00221	0.18382	0.96802	0.9677	0.000360718	0.03006
0.96786	0.96534	0.00284	0.23684	0.96786	0.96487	0.00337	0.28048	0.96786	0.96516	0.00304	0.25358	0.96786	0.96593	0.00217	0.18115	0.96786	0.96762	0.000270996	0.02258
0.96771	0.9651	0.00293	0.24437	0.96771	0.96488	0.00318	0.26525	0.96771	0.96471	0.00337	0.28084	0.96771	0.96589	0.00205	0.17064	0.96771	0.96756	0.000169373	0.01411
0.96756	0.96501	0.00287	0.23921	0.96756	0.96461	0.00331	0.27621	0.96756	0.96479	0.00311	0.2593	0.96756	0.96588	0.00189	0.15773	0.96756	0.96742	0.000158997	0.01325
0.96741	0.96484	0.00289	0.24045	0.96741	0.9643	0.00349	0.29104	0.96741	0.96462	0.00313	0.26059	0.96741	0.96575	0.00186	0.15518	0.96741	0.96744	-3.23486e-05	-0.0027
0.96725	0.96465	0.00293	0.24389	0.96725	0.96423	0.0034	0.28346	0.96725	0.96429	0.00334	0.27796	0.96725	0.9655	0.00197	0.16444	0.96725	0.96716	0.000101318	0.00844
0.9671	0.96458	0.00284	0.23661	0.9671	0.96425	0.00321	0.26726	0.9671	0.96443	0.003	0.25002	0.9671	0.96527	0.00206	0.17179	0.9671	0.96703	7.78198e-05	0.00648
0.96695	0.96432	0.00296	0.24653	0.96695	0.96406	0.00325	0.27074	0.96695	0.96405	0.00325	0.27112	0.96695	0.96508	0.0021	0.17532	0.96695	0.96684	0.000126343	0.01053
0.9668	0.9643	0.0028	0.23338	0.9668	0.96372	0.00346	0.28852	0.9668	0.96394	0.0032	0.26705	0.9668	0.96493	0.0021	0.1752	0.9668	0.96665	0.000170593	0.01422
0.96664	0.96398	0.00299	0.24918	0.96664	0.96355	0.00347	0.28941	0.96664	0.96396	0.00302	0.25129	0.96664	0.96495	0.00191	0.15882	0.96664	0.96638	0.000291748	0.02431
0.96649	0.96403	0.00277	0.23089	0.96649	0.96362	0.00322	0.26868	0.96649	0.96352	0.00334	0.27832	0.96649	0.96494	0.00174	0.14521	0.96649	0.9662	0.000322266	0.02686
0.96634	0.96366	0.00301	0.25101	0.96634	0.96349	0.0032	0.26688	0.96634	0.9636	0.00308	0.25635	0.96634	0.9647	0.00184	0.15338	0.96634	0.96604	0.000337219	0.0281
0.96619	0.96374	0.00275	0.22906	0.96619	0.96314	0.00342	0.28481	0.96619	0.96339	0.00314	0.26194	0.96619	0.96443	0.00198	0.16479	0.96619	0.96588	0.000343323	0.02861
0.96603	0.96335	0.00301	0.25106	0.96603	0.96294	0.00347	0.28948	0.96603	0.9631	0.0033	0.27479	0.96603	0.96415	0.00212	0.17652	0.96603	0.96576	0.000307617	0.02563
0.96588	0.96343	0.00275	0.22939	0.96588	0.96297	0.00327	0.27245	0.96588	0.9632	0.00302	0.25126	0.96588	0.96396	0.00216	0.1799	0.96588	0.96572	0.000180664	0.01506
0.96573	0.96305	0.00301	0.25042	0.96573	0.9629	0.00318	0.26487	0.96573	0.96283	0.00325	0.27107	0.96573	0.96394	0.00201	0.16716	0.96573	0.96562	0.000123596	0.0103
0.96558	0.96312	0.00276	0.2297	0.96558	0.9626	0.00334	0.27857	0.96558	0.96277	0.00315	0.26235	0.96558	0.96389	0.0019	0.15816	0.96558	0.96549	9.64355e-05	0.00804
0.96542	0.96276	0.00299	0.24897	0.96542	0.96232	0.00349	0.29096	0.96542	0.96272	0.00304	0.25337	0.96542	0.96377	0.00185	0.15439	0.96542	0.96548	-5.98145e-05	-0.00498
0.96527	0.96279	0.00279	0.23262	0.96527	0.9623	0.00333	0.27776	0.96527	0.96235	0.00329	0.27382	0.96527	0.9636	0.00188	0.15689	0.96527	0.96525	2.34985e-05	0.00196
0.96512	0.9625	0.00294	0.24503	0.96512	0.96231	0.00315	0.26288	0.96512	0.96244	0.003	0.25037	0.96512	0.96329	0.00205	0.1711	0.96512	0.96513	-1.37329e-05	-0.00114
0.96497	0.96245	0.00282	0.23521	0.96497	0.96204	0.00329	0.2742	0.96497	0.96212	0.00319	0.26624	0.96497	0.96309	0.00211	0.17591	0.96497	0.96495	2.16675e-05	0.00181
0.96481	0.96223	0.00291	0.24216	0.96481	0.96173	0.00347	0.28898	0.96481	0.96194	0.00323	0.26891	0.96481	0.96295	0.00209	0.17443	0.96481	0.96474	7.69043e-05	0.00641
0.96466	0.96212	0.00286	0.23809	0.96466	0.96167	0.00336	0.28038	0.96466	0.96199	0.003	0.25004	0.96466	0.96296	0.00191	0.15902	0.96466	0.96446	0.000221863	0.01849
0.96451	0.96197	0.00285	0.23766	0.96451	0.96168	0.00318	0.26482	0.96451	0.96155	0.00332	0.27664	0.96451	0.96295	0.00175	0.14557	0.96451	0.96431	0.000219727	0.01831
0.96436	0.96177	0.0029	0.242	0.96436	0.96148	0.00323	0.26894	0.96436	0.96162	0.00307	0.25581	0.96436	0.96277	0.00178	0.14839	0.96436	0.96408	0.000314026	0.02617
0.9642	0.9617	0.00281	0.23415	0.9642	0.96114	0.00344	0.28704	0.9642	0.96147	0.00307	0.25625	0.9642	0.96252	0.0019	0.15798	0.9642	0.96399	0.000235901	0.01966
0.96405	0.96143	0.00294	0.24488	0.96405	0.96099	0.00344	0.28636	0.96405	0.96113	0.00329	0.27377	0.96405	0.96223	0.00204	0.17019	0.96405	0.96384	0.000241394	0.02012
0.9639	0.96143	0.00277	0.23112	0.9639	0.96106	0.00319	0.26599	0.9639	0.96127	0.00295	0.24579	0.9639	0.96205	0.00207	0.17273	0.9639	0.96381	0.000102844	0.00857
0.96375	0.9611	0.00297	0.24732	0.96375	0.96092	0.00317	0.26416	0.96375	0.96089	0.00321	0.26718	0.96375	0.962	0.00196	0.16319	0.96375	0.96369	5.7373e-05	0.00478
0.96359	0.96115	0.00274	0.22842	0.96359	0.96057	0.00339	0.28282	0.96359	0.96078	0.00316	0.26375	0.96359	0.96194	0.00186	0.15498	0.96359	0.96358	1.09863e-05	0.000915527
0.96344	0.96078	0.00299	0.24902	0.96344	0.96038	0.00344	0.28633	0.96344	0.96081	0.00296	0.24643	0.96344	0.96184	0.0018	0.15025	0.96344	0.96351	-8.42285e-05	-0.00702
0.96329	0.96086	0.00272	0.2269	0.96329	0.96041	0.00323	0.26955	0.96329	0.96036	0.00329	0.27397	0.96329	0.96168	0.00181	0.15045	0.96329	0.96334	-5.40161e-05	-0.0045
0.96313	0.96048	0.00299	0.24882	0.96313	0.96033	0.00315	0.26217	0.96313	0.96044	0.00303	0.25233	0.96313	0.96136	0.002	0.16627	0.96313	0.96325	-0.000131836	-0.01099
0.96298	0.96055	0.00273	0.22733	0.96298	0.96003	0.00332	0.27669	0.96298	0.96024	0.00308	0.25698	0.96298	0.96107	0.00215	0.17878	0.96298	0.96304	-6.073e-05	-0.00506
0.96283	0.96018	0.00298	0.24796	0.96283	0.95975	0.00346	0.28809	0.96283	0.95994	0.00325	0.27095	0.96283	0.96101	0.00205	0.17044	0.96283	0.96284	-1.64795e-05	-0.00137
0.96268	0.96024	0.00274	0.22802	0.96268	0.95974	0.0033	0.27494	0.96268	0.96004	0.00296	0.24648	0.96268	0.96099	0.00189	0.15778	0.96268	0.96256	0.000133362	0.01111
0.96252	0.9599	0.00295	0.24582	0.96252	0.95974	0.00313	0.26042	0.96252	0.95968	0.0032	0.26634	0.96252	0.96097	0.00175	0.14544	0.96252	0.96242	0.000112	0.00933
0.96237	0.95991	0.00277	0.23094	0.96237	0.95947	0.00326	0.27206	0.96237	0.95961	0.00311	0.25887	0.96237	0.96086	0.0017	0.1417	0.96237	0.96213	0.000274963	0.02291
0.96222	0.95963	0.00291	0.24228	0.96222	0.95915	0.00344	0.28692	0.96222	0.95956	0.00298	0.24854	0.96222	0.96057	0.00185	0.15401	0.96222	0.9621	0.00013092	0.01091
0.96207	0.95957	0.0028	0.23364	0.96207	0.9591	0.00333	0.27789	0.96207	0.95919	0.00323	0.26947	0.96207	0.96034	0.00194	0.16151	0.96207	0.96193	0.000150757	0.01256
0.96191	0.95935	0.00288	0.23979	0.96191	0.95912	0.00314	0.26189	0.96191	0.95927	0.00297	0.24752	0.96191	0.96016	0.00198	0.16464	0.96191	0.96188	3.32642e-05	0.00277
0.96176	0.95923	0.00284	0.23697	0.96176	0.95891	0.00321	0.26721	0.96176	0.95897	0.00314	0.26146	0.96176	0.96004	0.00194	0.16146	0.96176	0.96177	-9.76562e-06	-0.000813802
0.96161	0.9591	0.00282	0.23486	0.96161	0.95857	0.00341	0.2844	0.96161	0.95877	0.00319	0.26594	0.96161	0.96004	0.00177	0.14727	0.96161	0.96169	-9.15527e-05	-0.00763
0.96146	0.95888	0.00289	0.24089	0.96146	0.95843	0.0034	0.28303	0.96146	0.95883	0.00295	0.24595	0.96146	0.95994	0.0017	0.14186	0.96146	0.9616	-0.000160828	-0.0134
0.9613	0.95883	0.00278	0.23132	0.9613	0.95849	0.00316	0.26367	0.9613	0.9584	0.00326	0.27189	0.9613	0.95978	0.00171	0.1429	0.9613	0.96144	-0.000151062	-0.01259
0.96115	0.95855	0.00292	0.24373	0.96115	0.95836	0.00314	0.26148	0.96115	0.95846	0.00302	0.25187	0.96115	0.95947	0.00189	0.15737	0.96115	0.96136	-0.000238342	-0.01986
0.961	0.95856	0.00274	0.22827	0.961	0.958	0.00337	0.28112	0.961	0.95831	0.00302	0.25134	0.961	0.95917	0.00205	0.17118	0.961	0.96114	-0.000155334	-0.01294
0.96085	0.95822	0.00295	0.24577	0.96085	0.95781	0.00341	0.2844	0.96085	0.95797	0.00323	0.26917	0.96085	0.95908	0.00199	0.16574	0.96085	0.96093	-9.552e-05	-0.00796
0.96069	0.95828	0.00271	0.22586	0.96069	0.95784	0.0032	0.26693	0.96069	0.95812	0.0029	0.24139	0.96069	0.95903	0.00187	0.15556	0.96069	0.96069	7.32422e-06	0.000610352
0.96054	0.9579	0.00296	0.24707	0.96054	0.95776	0.00313	0.26047	0.96054	0.95774	0.00315	0.26222	0.96054	0.95901	0.00172	0.14313	0.96054	0.96054	2.13623e-06	0.000178019
0.96039	0.95799	0.0027	0.22494	0.96039	0.95745	0.00331	0.27552	0.96039	0.95761	0.00312	0.26037	0.96039	0.95889	0.00168	0.13997	0.96039	0.96022	0.000188599	0.01572
0.96024	0.9576	0.00296	0.24661	0.96024	0.95718	0.00343	0.2858	0.96024	0.95765	0.00291	0.24254	0.96024	0.95864	0.00179	0.14956	0.96024	0.96022	2.10571e-05	0.00175
0.96008	0.95768	0.0027	0.22535	0.96008	0.95718	0.00327	0.27219	0.96008	0.9572	0.00324	0.27021	0.96008	0.95841	0.00188	0.15656	0.96008	0.96004	5.12695e-05	0.00427
0.95993	0.95731	0.00295	0.24579	0.95993	0.95717	0.0031	0.25805	0.95993	0.95728	0.00298	0.24846	0.95993	0.95821	0.00193	0.16085	0.95993	0.95996	-2.80762e-05	-0.00234
0.95978	0.95736	0.00272	0.22631	0.95978	0.9569	0.00324	0.2696	0.95978	0.95708	0.00304	0.25294	0.95978	0.95808	0.00191	0.15933	0.95978	0.95986	-8.88062e-05	-0.0074
0.95963	0.95703	0.00292	0.24333	0.95963	0.95658	0.00342	0.28491	0.95963	0.95677	0.00321	0.26774	0.95963	0.9581	0.00172	0.1431	0.95963	0.95981	-0.000205383	-0.01712
0.95947	0.95702	0.00276	0.22982	0.95947	0.95653	0.0033	0.2754	0.95947	0.95689	0.0029	0.24165	0.95947	0.95807	0.00157	0.13089	0.95947	0.95969	-0.000248718	-0.02073
0.95932	0.95674	0.0029	0.24167	0.95932	0.95652	0.00314	0.26176	0.95932	0.95648	0.00319	0.26568	0.95932	0.95781	0.0017	0.14137	0.95932	0.95952	-0.000219727	-0.01831
0.95917	0.95668	0.0028	0.23308	0.95917	0.95632	0.0032	0.267	0.95917	0.95641	0.00309	0.25787	0.95917	0.95753	0.00184	0.15348	0.95917	0.9594	-0.000265808	-0.02215
0.95901	0.95648	0.00285	0.23738	0.95901	0.95599	0.0034	0.28297	0.95901	0.95639	0.00295	0.24602	0.95901	0.95725	0.00198	0.16497	0.95901	0.95922	-0.000230713	-0.01923
0.95886	0.95633	0.00284	0.23692	0.95886	0.95586	0.00338	0.2815	0.95886	0.95602	0.0032	0.26649	0.95886	0.95708	0.002	0.16683	0.95886	0.95898	-0.00013092	-0.01091
0.95871	0.95623	0.00279	0.23247	0.95871	0.95591	0.00314	0.26179	0.95871	0.95608	0.00295	0.24595	0.95871	0.95706	0.00186	0.15483	0.95871	0.95877	-7.17163e-05	-0.00598
0.95856	0.956	0.00288	0.23961	0.95856	0.95578	0.00312	0.26001	0.95856	0.95581	0.00309	0.25752	0.95856	0.95701	0.00174	0.14498	0.95856	0.95862	-6.5918e-05	-0.00549
0.9584	0.95596	0.00275	0.22891	0.9584	0.95542	0.00336	0.27959	0.9584	0.9556	0.00316	0.26301	0.9584	0.95689	0.0017	0.14142	0.9584	0.95832	0.000100403	0.00837
0.95825	0.95567	0.0029	0.24208	0.95825	0.95524	0.00339	0.28226	0.95825	0.95566	0.00291	0.24261	0.95825	0.95671	0.00174	0.14463	0.95825	0.95827	-2.31934e-05	-0.00193
0.9581	0.95568	0.00271	0.22614	0.9581	0.95528	0.00317	0.26436	0.9581	0.95524	0.00321	0.26751	0.9581	0.95641	0.00189	0.1578	0.9581	0.95811	-9.76562e-06	-0.000813802
0.95795	0.95534	0.00293	0.24437	0.95795	0.95519	0.0031	0.25853	0.95795	0.95529	0.00299	0.24882	0.95795	0.95621	0.00195	0.16256	0.95795	0.958	-5.49316e-05	-0.00458
0.95779	0.95541	0.00268	0.22367	0.95779	0.95487	0.00329	0.27384	0.95779	0.95515	0.00297	0.2474	0.95779	0.95608	0.00192	0.16032	0.95779	0.95791	-0.000124512	-0.01038
0.95764	0.95502	0.00295	0.24567	0.95764	0.95461	0.0034	0.28366	0.95764	0.95481	0.00319	0.26543	0.95764	0.95609	0.00174	0.14531	0.95764	0.95789	-0.000279846	-0.02332
0.95749	0.9551	0.00268	0.22336	0.95749	0.95461	0.00324	0.26965	0.95749	0.95495	0.00285	0.23758	0.95749	0.9561	0.00156	0.13021	0.95749	0.95776	-0.000303345	-0.02528
0.95734	0.95473	0.00293	0.24442	0.95734	0.9546	0.00307	0.25612	0.95734	0.95458	0.0031	0.25831	0.95734	0.9559	0.00162	0.13489	0.95734	0.95767	-0.000370789	-0.0309
0.95718	0.9548	0.00268	0.22331	0.95718	0.95432	0.00322	0.26805	0.95718	0.95444	0.00308	0.25686	0.95718	0.95564	0.00174	0.14468	0.95718	0.95748	-0.000336304	-0.02803
0.95703	0.95443	0.00292	0.24348	0.95703	0.95401	0.0034	0.28295	0.95703	0.95448	0.00287	0.23905	0.95703	0.95535	0.00189	0.15745	0.95703	0.95735	-0.000353088	-0.02942
0.95688	0.95447	0.0027	0.22527	0.95688	0.95397	0.00327	0.2727	0.95688	0.95403	0.0032	0.2667	0.95688	0.95518	0.00191	0.1594	0.95688	0.95707	-0.000220337	-0.01836
0.95673	0.95416	0.00288	0.24033	0.95673	0.95398	0.00309	0.25749	0.95673	0.95411	0.00294	0.24506	0.95673	0.95513	0.00179	0.14915	0.95673	0.95689	-0.000181885	-0.01516
0.95657	0.95413	0.00274	0.22868	0.95657	0.95375	0.00317	0.264	0.95657	0.95391	0.00299	0.24938	0.95657	0.95506	0.00169	0.14125	0.95657	0.95672	-0.000159912	-0.01333
0.95642	0.95389	0.00285	0.23715	0.95642	0.95343	0.00336	0.27987	0.95642	0.9536	0.00317	0.264	0.95642	0.95496	0.00164	0.13639	0.95642	0.95647	-5.70679e-05	-0.00476
0.95627	0.9538	0.00277	0.23099	0.95627	0.9533	0.00333	0.27751	0.95627	0.95373	0.00285	0.23743	0.95627	0.95481	0.00164	0.13654	0.95627	0.95637	-0.000118408	-0.00987
0.95612	0.95362	0.0028	0.23338	0.95612	0.95336	0.0031	0.25828	0.95612	0.95335	0.00311	0.25879	0.95612	0.95449	0.00183	0.15256	0.95612	0.95618	-6.86646e-05	-0.00572
0.95596	0.95345	0.00282	0.23493	0.95596	0.95322	0.00309	0.25724	0.95596	0.95327	0.00303	0.25223	0.95596	0.95421	0.00197	0.16398	0.95596	0.95608	-0.000135498	-0.01129
0.95581	0.95336	0.00275	0.22906	0.95581	0.95285	0.00332	0.27677	0.95581	0.95325	0.00288	0.23982	0.95581	0.95414	0.00188	0.15676	0.95581	0.95598	-0.00019165	-0.01597
0.95566	0.95312	0.00286	0.23801	0.95566	0.95267	0.00335	0.27939	0.95566	0.95286	0.00315	0.2621	0.95566	0.95412	0.00172	0.14356	0.95566	0.95598	-0.000357971	-0.02983
0.95551	0.95309	0.00271	0.22583	0.95551	0.95271	0.00314	0.26179	0.95551	0.95292	0.0029	0.2419	0.95551	0.9541	0.00158	0.13204	0.95551	0.95583	-0.00036438	-0.03036
0.95535	0.95278	0.00289	0.24078	0.95535	0.95261	0.00308	0.25642	0.95535	0.95267	0.00302	0.25144	0.95535	0.95398	0.00155	0.12876	0.95535	0.95581	-0.000517578	-0.04313
0.9552	0.95281	0.00268	0.22346	0.9552	0.9523	0.00326	0.27158	0.9552	0.95243	0.00311	0.2592	0.9552	0.95371	0.00168	0.13977	0.9552	0.95555	-0.000395203	-0.03293
0.95505	0.95245	0.00291	0.24277	0.95505	0.95205	0.00337	0.28061	0.95505	0.9525	0.00286	0.23865	0.95505	0.95346	0.00178	0.14849	0.95505	0.95544	-0.000441589	-0.0368
0.9549	0.95253	0.00266	0.22125	0.9549	0.95205	0.0032	0.2667	0.9549	0.95209	0.00315	0.26222	0.9549	0.95328	0.00182	0.15149	0.9549	0.95518	-0.000317688	-0.02647
0.95474	0.95214	0.00292	0.24328	0.95474	0.95203	0.00304	0.25355	0.95474	0.95212	0.00294	0.24511	0.95474	0.95317	0.00176	0.14679	0.95474	0.955	-0.000283813	-0.02365
0.95459	0.95222	0.00266	0.22146	0.95459	0.95176	0.00318	0.2654	0.95459	0.952	0.00292	0.24292	0.95459	0.95316	0.00161	0.1339	0.95459	0.9548	-0.000233154	-0.01943
0.95444	0.95185	0.00291	0.24254	0.95444	0.95144	0.00337	0.28084	0.95444	0.95165	0.00313	0.2609	0.95444	0.95306	0.00154	0.12866	0.95444	0.95459	-0.000167847	-0.01399
0.95428	0.95192	0.00266	0.22186	0.95428	0.9514	0.00324	0.2698	0.95428	0.95179	0.0028	0.23359	0.95428	0.9529	0.00156	0.12998	0.95428	0.95446	-0.000195618	-0.0163
0.95413	0.95156	0.00289	0.24099	0.95413	0.95141	0.00306	0.25487	0.95413	0.95142	0.00305	0.25393	0.95413	0.95259	0.00173	0.14417	0.95413	0.95424	-0.000119019	-0.00992
0.95398	0.95159	0.00269	0.2242	0.95398	0.95119	0.00314	0.26156	0.95398	0.95128	0.00304	0.25302	0.95398	0.95229	0.0019	0.15821	0.95398	0.95416	-0.000203857	-0.01699
0.95383	0.9513	0.00284	0.23684	0.95383	0.95086	0.00333	0.27743	0.95383	0.95132	0.00282	0.23499	0.95383	0.95221	0.00182	0.15134	0.95383	0.95408	-0.000279236	-0.02327
0.95367	0.95125	0.00272	0.22687	0.95367	0.95075	0.00329	0.27423	0.95367	0.95087	0.00315	0.2624	0.95367	0.95216	0.0017	0.14198	0.95367	0.95404	-0.000413818	-0.03448
0.95352	0.95101	0.00282	0.23486	0.95352	0.95079	0.00307	0.25586	0.95352	0.95094	0.0029	0.24142	0.95352	0.95215	0.00155	0.12889	0.95352	0.95389	-0.000411072	-0.03426
0.95337	0.95092	0.00276	0.22959	0.95337	0.95065	0.00306	0.25487	0.95337	0.95076	0.00294	0.2446	0.95337	0.95203	0.00151	0.12583	0.95337	0.95391	-0.00060791	-0.05066
0.95322	0.95076	0.00276	0.2299	0.95322	0.95028	0.0033	0.27473	0.95322	0.95043	0.00313	0.26067	0.95322	0.95177	0.00163	0.13552	0.95322	0.95363	-0.000462341	-0.03853
0.95306	0.95056	0.00281	0.23425	0.95306	0.95011	0.00332	0.27692	0.95306	0.95058	0.0028	0.23298	0.95306	0.95154	0.00171	0.14236	0.95306	0.9535	-0.000491943	-0.041
0.95291	0.9505	0.00271	0.22619	0.95291	0.95015	0.00311	0.25884	0.95291	0.95019	0.00306	0.25477	0.95291	0.95135	0.00176	0.14651	0.95291	0.95328	-0.000419617	-0.03497
0.95276	0.95023	0.00284	0.23705	0.95276	0.95004	0.00305	0.25429	0.95276	0.95011	0.00298	0.24793	0.95276	0.9512	0.00175	0.14562	0.95276	0.95309	-0.000368958	-0.03075
0.95261	0.95022	0.00268	0.22316	0.95261	0.94973	0.00324	0.2696	0.95261	0.95009	0.00282	0.23514	0.95261	0.95123	0.00154	0.12871	0.95261	0.95285	-0.000270996	-0.02258
0.95245	0.9499	0.00287	0.23931	0.95245	0.94949	0.00333	0.27763	0.95245	0.9497	0.0031	0.25803	0.95245	0.95119	0.00141	0.11785	0.95245	0.95267	-0.000239563	-0.01996
0.9523	0.94995	0.00265	0.22046	0.9523	0.94948	0.00317	0.26398	0.9523	0.94976	0.00286	0.23832	0.9523	0.95098	0.00149	0.12395	0.9523	0.95253	-0.000252991	-0.02108
0.95215	0.94957	0.0029	0.24139	0.95215	0.94947	0.00301	0.25124	0.95215	0.94952	0.00296	0.24638	0.95215	0.9507	0.00163	0.13601	0.95215	0.95233	-0.00019928	-0.01661
0.952	0.94967	0.00261	0.21746	0.952	0.94921	0.00314	0.26126	0.952	0.9493	0.00303	0.25284	0.952	0.95045	0.00174	0.14481	0.952	0.95227	-0.000305176	-0.02543
0.95184	0.94928	0.00288	0.2401	0.95184	0.94889	0.00332	0.27662	0.95184	0.94937	0.00278	0.23193	0.95184	0.95027	0.00176	0.14704	0.95184	0.95221	-0.00040802	-0.034
0.95169	0.94935	0.00263	0.21889	0.95169	0.94885	0.00319	0.26594	0.95169	0.94897	0.00306	0.2551	0.95169	0.95024	0.00163	0.13598	0.95169	0.95212	-0.00048645	-0.04054
0.95154	0.94898	0.00288	0.23987	0.95154	0.94886	0.00301	0.2506	0.95154	0.94897	0.00288	0.24025	0.95154	0.95019	0.00151	0.12606	0.95154	0.95199	-0.000503235	-0.04194
0.95139	0.94904	0.00264	0.2197	0.95139	0.94862	0.00311	0.25884	0.95139	0.94886	0.00284	0.23656	0.95139	0.95007	0.00147	0.12276	0.95139	0.952	-0.00068573	-0.05714
0.95123	0.94869	0.00286	0.23799	0.95123	0.9483	0.0033	0.27463	0.95123	0.94851	0.00306	0.25492	0.95123	0.94987	0.00153	0.12731	0.95123	0.95172	-0.000552673	-0.04606
0.95108	0.9487	0.00268	0.22301	0.95108	0.94819	0.00325	0.27061	0.95108	0.94864	0.00274	0.22817	0.95108	0.94959	0.00167	0.13931	0.95108	0.95161	-0.000594177	-0.04951
0.95093	0.94842	0.00281	0.23438	0.95093	0.94823	0.00304	0.25294	0.95093	0.94827	0.00298	0.24851	0.95093	0.94939	0.00173	0.14381	0.95093	0.95142	-0.000552368	-0.04603
0.95078	0.94837	0.0027	0.22527	0.95078	0.94808	0.00303	0.25251	0.95078	0.94812	0.00298	0.24818	0.95078	0.94925	0.00171	0.14254	0.95078	0.95122	-0.00049469	-0.04122
0.95062	0.94815	0.00277	0.23125	0.95062	0.94771	0.00327	0.2729	0.95062	0.94816	0.00277	0.23043	0.95062	0.94926	0.00154	0.12805	0.95062	0.95094	-0.000359497	-0.02996
0.95047	0.94802	0.00275	0.22939	0.95047	0.94754	0.00329	0.27445	0.95047	0.94771	0.0031	0.25843	0.95047	0.94926	0.00135	0.11286	0.95047	0.95077	-0.000341492	-0.02846
0.95032	0.9479	0.00272	0.22647	0.95032	0.94759	0.00307	0.25579	0.95032	0.94779	0.00284	0.23692	0.95032	0.94904	0.00143	0.11927	0.95032	0.95059	-0.00030365	-0.0253
0.95016	0.94768	0.00279	0.2329	0.95016	0.94748	0.00302	0.25177	0.95016	0.9476	0.00288	0.23977	0.95016	0.94879	0.00155	0.12896	0.95016	0.95046	-0.000329895	-0.02749
0.95001	0.94763	0.00268	0.22341	0.95001	0.94715	0.00322	0.268	0.95001	0.94728	0.00307	0.25579	0.95001	0.9485	0.00169	0.14125	0.95001	0.95031	-0.000334167	-0.02785
0.94986	0.94734	0.00283	0.23595	0.94986	0.94692	0.0033	0.27534	0.94986	0.94742	0.00274	0.22873	0.94986	0.94832	0.00173	0.14409	0.94986	0.95028	-0.000476074	-0.03967
0.94971	0.94735	0.00265	0.22067	0.94971	0.94692	0.00313	0.26077	0.94971	0.94704	0.003	0.24981	0.94971	0.9483	0.00158	0.13204	0.94971	0.95017	-0.000524597	-0.04372
0.94955	0.94701	0.00286	0.23806	0.94955	0.9469	0.00298	0.24867	0.94955	0.94695	0.00293	0.24424	0.94955	0.94821	0.00151	0.12594	0.94955	0.95005	-0.000552063	-0.04601
0.9494	0.94707	0.00262	0.21797	0.9494	0.94661	0.00314	0.26174	0.9494	0.94694	0.00277	0.23046	0.9494	0.94811	0.00145	0.12082	0.9494	0.95002	-0.000689087	-0.05742
0.94925	0.94669	0.00287	0.23954	0.94925	0.9463	0.00331	0.2758	0.94925	0.94653	0.00305	0.25454	0.94925	0.94795	0.00146	0.12192	0.94925	0.9498	-0.000622253	-0.05185
0.9491	0.94678	0.00261	0.21729	0.9491	0.94628	0.00317	0.26416	0.9491	0.9466	0.00281	0.23384	0.9491	0.94762	0.00166	0.13822	0.9491	0.9497	-0.000678101	-0.05651
0.94894	0.9464	0.00286	0.23865	0.94894	0.94628	0.00299	0.24933	0.94894	0.94636	0.0029	0.24155	0.94894	0.94736	0.00177	0.14791	0.94894	0.9495	-0.000628662	-0.05239
0.94879	0.94647	0.00261	0.21736	0.94879	0.94604	0.00309	0.25752	0.94879	0.9461	0.00302	0.25174	0.94879	0.94728	0.0017	0.14137	0.94879	0.9493	-0.000571289	-0.04761
0.94864	0.9461	0.00285	0.23786	0.94864	0.94572	0.00328	0.27349	0.94864	0.94618	0.00276	0.2302	0.94864	0.94727	0.00154	0.1285	0.94864	0.94901	-0.000420532	-0.03504
0.94849	0.94615	0.00262	0.21863	0.94849	0.94562	0.00322	0.26825	0.94849	0.9458	0.00302	0.25164	0.94849	0.94725	0.00138	0.11541	0.94849	0.94887	-0.000429688	-0.03581
0.94833	0.94583	0.00282	0.23481	0.94833	0.94566	0.00301	0.25052	0.94833	0.94579	0.00286	0.23809	0.94833	0.94712	0.00136	0.11358	0.94833	0.94861	-0.000313721	-0.02614
0.94818	0.94581	0.00267	0.22247	0.94818	0.9455	0.00301	0.25096	0.94818	0.94569	0.00279	0.2329	0.94818	0.94685	0.00149	0.12456	0.94818	0.94855	-0.000419006	-0.03492
0.94803	0.94556	0.00278	0.2316	0.94803	0.94513	0.00325	0.27095	0.94803	0.94533	0.00303	0.25223	0.94803	0.94659	0.00162	0.13474	0.94803	0.94838	-0.000395813	-0.03298
0.94788	0.94548	0.00269	0.22453	0.94788	0.94497	0.00327	0.27217	0.94788	0.94546	0.00271	0.22591	0.94788	0.94641	0.00165	0.13751	0.94788	0.94835	-0.000536194	-0.04468
0.94772	0.94528	0.00274	0.22835	0.94772	0.94502	0.00303	0.25269	0.94772	0.9451	0.00294	0.24539	0.94772	0.94631	0.00158	0.13191	0.94772	0.94823	-0.00057373	-0.04781
0.94757	0.94513	0.00275	0.22888	0.94757	0.94491	0.00299	0.24956	0.94757	0.94495	0.00295	0.24564	0.94757	0.94629	0.00144	0.11968	0.94757	0.94813	-0.000632324	-0.05269
0.94742	0.94503	0.00269	0.22392	0.94742	0.94457	0.00319	0.26624	0.94742	0.94499	0.00273	0.22733	0.94742	0.94619	0.00138	0.11503	0.94742	0.94805	-0.000709839	-0.05915
0.94727	0.94479	0.00278	0.23188	0.94727	0.94435	0.00327	0.2726	0.94727	0.94454	0.00306	0.25477	0.94727	0.94604	0.00138	0.115	0.94727	0.94788	-0.000686035	-0.05717
0.94711	0.94476	0.00265	0.22077	0.94711	0.94436	0.00309	0.2579	0.94711	0.94461	0.00281	0.23407	0.94711	0.94573	0.00156	0.12967	0.94711	0.9478	-0.000776062	-0.06467
0.94696	0.94445	0.00282	0.23476	0.94696	0.94432	0.00297	0.24709	0.94696	0.94445	0.00282	0.23529	0.94696	0.94542	0.00173	0.1445	0.94696	0.94759	-0.00070343	-0.05862
0.94681	0.94448	0.00262	0.21792	0.94681	0.94403	0.00312	0.26001	0.94681	0.9441	0.00304	0.2535	0.94681	0.94534	0.00165	0.13713	0.94681	0.94738	-0.000646057	-0.05384
0.94666	0.94413	0.00284	0.23664	0.94666	0.94373	0.00329	0.27397	0.94666	0.94425	0.0027	0.2253	0.94666	0.94529	0.00153	0.12754	0.94666	0.94712	-0.000520325	-0.04336
0.9465	0.9442	0.00259	0.21578	0.9465	0.9437	0.00315	0.26215	0.9465	0.94387	0.00296	0.2463	0.9465	0.94528	0.00137	0.11419	0.9465	0.94698	-0.000531616	-0.0443
0.94635	0.94382	0.00285	0.23733	0.94635	0.94372	0.00296	0.24663	0.94635	0.94377	0.0029	0.24134	0.94635	0.94517	0.00132	0.11019	0.94635	0.94666	-0.000348206	-0.02902
0.9462	0.9439	0.00259	0.21545	0.9462	0.94347	0.00306	0.25538	0.9462	0.94378	0.00272	0.22659	0.9462	0.9449	0.00146	0.12149	0.9462	0.94665	-0.000508118	-0.04234
0.94604	0.94352	0.00284	0.23649	0.94604	0.94315	0.00325	0.27107	0.94604	0.94336	0.00302	0.25162	0.94604	0.94467	0.00154	0.12861	0.94604	0.94647	-0.000482178	-0.04018
0.94589	0.94359	0.00259	0.21581	0.94589	0.94305	0.00319	0.26568	0.94589	0.94343	0.00277	0.23089	0.94589	0.94448	0.00158	0.13204	0.94589	0.94641	-0.000581665	-0.04847
0.94574	0.94322	0.00283	0.23575	0.94574	0.94308	0.00298	0.24867	0.94574	0.94321	0.00285	0.23727	0.94574	0.94434	0.00157	0.13117	0.94574	0.94631	-0.000635376	-0.05295
0.94559	0.94326	0.00261	0.21779	0.94559	0.94292	0.00299	0.24956	0.94559	0.94293	0.00298	0.24872	0.94559	0.94437	0.00137	0.11431	0.94559	0.94624	-0.000729675	-0.06081
0.94543	0.94296	0.00278	0.23135	0.94543	0.94257	0.00322	0.26858	0.94543	0.94301	0.00272	0.22659	0.94543	0.94432	0.00126	0.1046	0.94543	0.94613	-0.000779724	-0.06498
0.94528	0.94292	0.00265	0.22072	0.94528	0.9424	0.00324	0.26998	0.94528	0.94265	0.00296	0.24656	0.94528	0.94411	0.00132	0.10994	0.94528	0.94597	-0.0007724	-0.06437
0.94513	0.94269	0.00275	0.22883	0.94513	0.94246	0.003	0.25019	0.94513	0.94262	0.00282	0.23539	0.94513	0.94382	0.00147	0.12273	0.94513	0.94588	-0.000843506	-0.07029
0.94498	0.94259	0.00268	0.22344	0.94498	0.94233	0.00297	0.24745	0.94498	0.94253	0.00275	0.22881	0.94498	0.94354	0.00161	0.1343	0.94498	0.94568	-0.000786438	-0.06554
0.94482	0.94242	0.0027	0.22497	0.94482	0.942	0.00317	0.264	0.94482	0.94216	0.00299	0.24905	0.94482	0.94337	0.00163	0.13583	0.94482	0.94546	-0.000714417	-0.05953
0.94467	0.94224	0.00274	0.22802	0.94467	0.94178	0.00325	0.27049	0.94467	0.94229	0.00268	0.22321	0.94467	0.94334	0.0015	0.12502	0.94467	0.94522	-0.000619202	-0.0516
0.94452	0.94216	0.00265	0.22102	0.94452	0.9418	0.00306	0.2549	0.94452	0.94194	0.0029	0.24132	0.94452	0.9433	0.00137	0.11381	0.94452	0.94508	-0.000624695	-0.05206
0.94437	0.94191	0.00276	0.23036	0.94437	0.94176	0.00293	0.24427	0.94437	0.94178	0.00291	0.24246	0.94437	0.94319	0.00133	0.1105	0.94437	0.94475	-0.000431213	-0.03593
0.94421	0.94189	0.00261	0.21746	0.94421	0.94146	0.0031	0.25792	0.94421	0.94182	0.00269	0.2243	0.94421	0.94298	0.00139	0.11571	0.94421	0.94473	-0.000579529	-0.04829
0.94406	0.94157	0.0028	0.23346	0.94406	0.94116	0.00326	0.27158	0.94406	0.94137	0.00302	0.25157	0.94406	0.94271	0.00152	0.12672	0.94406	0.94456	-0.00056427	-0.04702
0.94391	0.94161	0.00258	0.21533	0.94391	0.94114	0.00311	0.25917	0.94391	0.94145	0.00276	0.23041	0.94391	0.94251	0.00157	0.13092	0.94391	0.94446	-0.000623474	-0.05196
0.94376	0.94125	0.00282	0.23493	0.94376	0.94115	0.00293	0.24384	0.94376	0.94128	0.00278	0.23198	0.94376	0.94237	0.00156	0.12965	0.94376	0.94437	-0.00068512	-0.05709
0.9436	0.94133	0.00256	0.21329	0.9436	0.94089	0.00305	0.25386	0.9436	0.94094	0.00299	0.24905	0.9436	0.94238	0.00137	0.11429	0.9436	0.94434	-0.000822754	-0.06856
0.94345	0.94094	0.00283	0.23549	0.94345	0.94058	0.00323	0.26883	0.94345	0.94109	0.00265	0.22079	0.94345	0.94239	0.0012	0.09959	0.94345	0.94422	-0.000860596	-0.07172
0.9433	0.94101	0.00257	0.2138	0.9433	0.94049	0.00316	0.26304	0.9433	0.94071	0.00291	0.24256	0.9433	0.94216	0.00127	0.1062	0.9433	0.94409	-0.000889587	-0.07413
0.94315	0.94064	0.00282	0.23483	0.94315	0.94052	0.00295	0.246	0.94315	0.94061	0.00285	0.23758	0.94315	0.9419	0.0014	0.1163	0.94315	0.94394	-0.00089386	-0.07449
0.94299	0.94071	0.00257	0.21413	0.94299	0.94035	0.00297	0.24775	0.94299	0.94062	0.00267	0.22235	0.94299	0.94162	0.00155	0.12894	0.94299	0.94378	-0.000887756	-0.07398
0.94284	0.94035	0.0028	0.23303	0.94284	0.94	0.0032	0.26639	0.94284	0.94019	0.00298	0.24793	0.94284	0.94143	0.00158	0.13199	0.94284	0.94352	-0.000758057	-0.06317
0.94269	0.94037	0.00261	0.21723	0.94269	0.93983	0.00322	0.26792	0.94269	0.94026	0.00272	0.227	0.94269	0.9414	0.00144	0.12024	0.94269	0.94333	-0.000718384	-0.05987
0.94254	0.94009	0.00275	0.22898	0.94254	0.93989	0.00298	0.24793	0.94254	0.94005	0.00279	0.23259	0.94254	0.94134	0.00135	0.11218	0.94254	0.94316	-0.000700989	-0.05842
0.94238	0.94003	0.00264	0.21988	0.94238	0.93976	0.00294	0.24518	0.94238	0.93977	0.00294	0.24485	0.94238	0.94122	0.0013	0.10849	0.94238	0.94289	-0.000569763	-0.04748
0.94223	0.93981	0.00272	0.22664	0.94223	0.93942	0.00315	0.26273	0.94223	0.93985	0.00267	0.22291	0.94223	0.94106	0.00131	0.10943	0.94223	0.94281	-0.000653992	-0.0545
0.94208	0.9397	0.00268	0.22303	0.94208	0.93922	0.00321	0.26784	0.94208	0.93949	0.00291	0.24223	0.94208	0.94074	0.00151	0.12543	0.94208	0.94263	-0.000625	-0.05208
0.94193	0.93956	0.00266	0.22179	0.94193	0.93923	0.00303	0.25228	0.94193	0.93944	0.00279	0.23229	0.94193	0.94049	0.00161	0.13458	0.94193	0.94252	-0.000673218	-0.0561
0.94177	0.93935	0.00272	0.22703	0.94177	0.93918	0.00291	0.24231	0.94177	0.93938	0.00269	0.2242	0.94177	0.94039	0.00155	0.12937	0.94177	0.94243	-0.000736389	-0.06137
0.94162	0.93929	0.00262	0.21861	0.94162	0.93888	0.00308	0.25663	0.94162	0.93901	0.00294	0.2447	0.94162	0.94039	0.00139	0.11548	0.94162	0.94242	-0.000899963	-0.075
0.94147	0.93901	0.00276	0.22962	0.94147	0.93859	0.00323	0.26919	0.94147	0.93911	0.00265	0.22062	0.94147	0.94037	0.00124	0.10305	0.94147	0.94228	-0.000909729	-0.07581
0.94131	0.93901	0.00258	0.2154	0.94131	0.93857	0.00308	0.25678	0.94131	0.93878	0.00285	0.23715	0.94131	0.94023	0.00122	0.10165	0.94131	0.94222	-0.00101	-0.08446
0.94116	0.93868	0.00278	0.23196	0.94116	0.93859	0.0029	0.24127	0.94116	0.93861	0.00287	0.23918	0.94116	0.93996	0.00135	0.11238	0.94116	0.942	-0.000937805	-0.07815
0.94101	0.93874	0.00255	0.21268	0.94101	0.93832	0.00302	0.25197	0.94101	0.93865	0.00265	0.22105	0.94101	0.9397	0.00147	0.12258	0.94101	0.94186	-0.000960693	-0.08006
0.94086	0.93836	0.00281	0.23382	0.94086	0.93801	0.0032	0.26688	0.94086	0.9382	0.00298	0.24831	0.94086	0.93952	0.0015	0.12487	0.94086	0.9416	-0.000836792	-0.06973
0.9407	0.93844	0.00254	0.21169	0.9407	0.93792	0.00312	0.26034	0.9407	0.93828	0.00273	0.22731	0.9407	0.93944	0.00143	0.11882	0.9407	0.94142	-0.000804443	-0.06704
0.94055	0.93806	0.0028	0.23321	0.94055	0.93795	0.00292	0.24348	0.94055	0.93812	0.00273	0.22751	0.94055	0.9394	0.00129	0.10755	0.94055	0.94123	-0.000766907	-0.06391
0.9404	0.93813	0.00255	0.2121	0.9404	0.93777	0.00296	0.24643	0.9404	0.93778	0.00294	0.2449	0.9404	0.9393	0.00124	0.10335	0.9404	0.94101	-0.000683594	-0.05697
0.94025	0.93776	0.00279	0.23277	0.94025	0.93742	0.00318	0.26477	0.94025	0.93792	0.00261	0.21741	0.94025	0.93914	0.00124	0.10351	0.94025	0.94089	-0.000721436	-0.06012
0.94009	0.93782	0.00256	0.21311	0.94009	0.93726	0.00319	0.26548	0.94009	0.93755	0.00286	0.23847	0.94009	0.93883	0.00142	0.11846	0.94009	0.94067	-0.000650024	-0.05417
0.93994	0.93748	0.00276	0.23003	0.93994	0.93732	0.00294	0.24523	0.93994	0.93744	0.00282	0.23463	0.93994	0.93853	0.00159	0.13242	0.93994	0.9406	-0.00073822	-0.06152
0.93979	0.93747	0.00261	0.21723	0.93979	0.93718	0.00293	0.24404	0.93979	0.93744	0.00264	0.21988	0.93979	0.93844	0.00152	0.12657	0.93979	0.94048	-0.000775146	-0.0646
0.93964	0.93721	0.00273	0.22741	0.93964	0.93685	0.00314	0.26133	0.93964	0.937	0.00296	0.24651	0.93964	0.93839	0.0014	0.11635	0.93964	0.94046	-0.000931091	-0.07759
0.93948	0.93714	0.00263	0.21914	0.93948	0.93665	0.00319	0.26571	0.93948	0.93709	0.00269	0.2243	0.93948	0.93838	0.00124	0.10333	0.93948	0.94031	-0.000931702	-0.07764
0.93933	0.93694	0.00269	0.22408	0.93933	0.93666	0.003	0.24996	0.93933	0.93688	0.00276	0.2298	0.93933	0.93828	0.00118	0.09865	0.93933	0.94032	-0.00111	-0.09234
0.93918	0.9368	0.00267	0.22283	0.93918	0.9366	0.0029	0.24142	0.93918	0.93659	0.00291	0.24282	0.93918	0.938	0.00132	0.11022	0.93918	0.94004	-0.00096344	-0.08029
0.93903	0.93669	0.00263	0.21907	0.93903	0.93631	0.00305	0.25452	0.93903	0.93669	0.00263	0.21907	0.93903	0.93778	0.0014	0.11676	0.93903	0.93992	-0.00101	-0.08405
0.93887	0.93646	0.00271	0.22616	0.93887	0.93602	0.00321	0.26721	0.93887	0.93632	0.00287	0.23893	0.93887	0.93758	0.00145	0.1209	0.93887	0.93968	-0.000905151	-0.07543
0.93872	0.93642	0.00259	0.21573	0.93872	0.93601	0.00305	0.25411	0.93872	0.93626	0.00276	0.2302	0.93872	0.93745	0.00143	0.11884	0.93872	0.93949	-0.000864563	-0.07205
0.93857	0.93613	0.00274	0.22873	0.93857	0.93601	0.00287	0.23941	0.93857	0.93621	0.00265	0.22079	0.93857	0.93748	0.00123	0.10213	0.93857	0.93927	-0.000788879	-0.06574
0.93842	0.93614	0.00255	0.21273	0.93842	0.93574	0.003	0.25035	0.93842	0.93584	0.00289	0.24094	0.93842	0.93741	0.00112	0.09371	0.93842	0.93908	-0.00074707	-0.06226
0.93826	0.9358	0.00277	0.23074	0.93826	0.93542	0.00319	0.26576	0.93826	0.93593	0.00262	0.21871	0.93826	0.93722	0.00117	0.09755	0.93826	0.93894	-0.00076416	-0.06368
0.93811	0.93587	0.00252	0.21016	0.93811	0.93536	0.00309	0.2578	0.93811	0.93562	0.0028	0.23364	0.93811	0.93693	0.00133	0.11058	0.93811	0.93873	-0.000693665	-0.05781
0.93796	0.93548	0.00279	0.23224	0.93796	0.93538	0.0029	0.24155	0.93796	0.93543	0.00284	0.23682	0.93796	0.93664	0.00148	0.12349	0.93796	0.93865	-0.000776672	-0.06472
0.93781	0.93556	0.00252	0.20978	0.93781	0.93519	0.00294	0.24495	0.93781	0.93548	0.00261	0.21751	0.93781	0.93649	0.00148	0.12352	0.93781	0.93857	-0.000856934	-0.07141
0.93765	0.93518	0.00278	0.2314	0.93765	0.93485	0.00315	0.2626	0.93765	0.93504	0.00294	0.2447	0.93765	0.93645	0.00135	0.11274	0.93765	0.93851	-0.000961609	-0.08013
0.9375	0.93526	0.00252	0.21004	0.9375	0.93469	0.00316	0.26296	0.9375	0.93511	0.00268	0.22367	0.9375	0.93642	0.00121	0.10086	0.9375	0.93837	-0.000973511	-0.08113
0.93735	0.93488	0.00278	0.23137	0.93735	0.93474	0.00293	0.24376	0.93735	0.93494	0.0027	0.22512	0.93735	0.93628	0.0012	0.09959	0.93735	0.93837	-0.00115	-0.096
0.93719	0.93493	0.00255	0.21217	0.93719	0.93462	0.0029	0.24129	0.93719	0.93461	0.0029	0.24208	0.93719	0.93607	0.00127	0.10559	0.93719	0.93809	-0.00101	-0.08382
0.93704	0.93461	0.00273	0.22758	0.93704	0.93427	0.00312	0.25973	0.93704	0.93475	0.00258	0.21461	0.93704	0.93581	0.00138	0.11525	0.93704	0.93797	-0.00105	-0.0871
0.93689	0.93459	0.00258	0.21495	0.93689	0.93408	0.00316	0.26329	0.93689	0.93438	0.00282	0.23473	0.93689	0.93562	0.00143	0.11932	0.93689	0.93777	-0.000985413	-0.08212
0.93674	0.93434	0.00269	0.22433	0.93674	0.9341	0.00297	0.24712	0.93674	0.93425	0.00279	0.23244	0.93674	0.93548	0.00142	0.11798	0.93674	0.93757	-0.000932922	-0.07774
0.93658	0.93426	0.00261	0.21764	0.93658	0.93403	0.00287	0.2389	0.93658	0.93429	0.00258	0.21497	0.93658	0.93549	0.00123	0.10262	0.93658	0.93731	-0.000819397	-0.06828
0.93643	0.93407	0.00265	0.22074	0.93643	0.93373	0.00304	0.25335	0.93643	0.93384	0.00291	0.24231	0.93643	0.93549	0.00106	0.08807	0.93643	0.93713	-0.000785217	-0.06543
0.93628	0.93391	0.00266	0.22168	0.93628	0.93345	0.00318	0.2653	0.93628	0.93393	0.00264	0.22016	0.93628	0.93527	0.00114	0.09481	0.93628	0.93698	-0.000786133	-0.06551
0.93613	0.93382	0.0026	0.21627	0.93613	0.93343	0.00303	0.2521	0.93613	0.93372	0.00271	0.22573	0.93613	0.935	0.00126	0.10531	0.93613	0.93681	-0.000769043	-0.06409
0.93597	0.93358	0.0027	0.22461	0.93597	0.93344	0.00285	0.2372	0.93597	0.93342	0.00287	0.23921	0.93597	0.93472	0.00141	0.11716	0.93597	0.93669	-0.000800476	-0.06671
0.93582	0.93355	0.00255	0.21286	0.93582	0.93317	0.00298	0.24839	0.93582	0.93353	0.00258	0.21495	0.93582	0.93453	0.00145	0.12121	0.93582	0.93665	-0.000925293	-0.07711
0.93567	0.93324	0.00273	0.22746	0.93567	0.93285	0.00316	0.26352	0.93567	0.93316	0.00281	0.23458	0.93567	0.93451	0.0013	0.10862	0.93567	0.93655	-0.000987549	-0.0823
0.93552	0.93327	0.00252	0.21029	0.93552	0.93279	0.00306	0.25525	0.93552	0.93309	0.00273	0.2272	0.93552	0.93444	0.00121	0.10091	0.93552	0.93642	-0.00101	-0.08446
0.93536	0.93291	0.00276	0.2297	0.93536	0.93281	0.00287	0.23944	0.93536	0.93305	0.0026	0.21655	0.93536	0.93433	0.00116	0.09679	0.93536	0.93641	-0.00118	-0.09816
0.93521	0.93299	0.0025	0.20831	0.93521	0.93261	0.00292	0.24338	0.93521	0.93267	0.00285	0.2375	0.93521	0.93416	0.00118	0.09799	0.93521	0.93617	-0.00108	-0.0902
0.93506	0.9326	0.00277	0.23046	0.93506	0.93228	0.00313	0.26044	0.93506	0.93275	0.00259	0.21601	0.93506	0.93384	0.00136	0.11368	0.93506	0.93605	-0.00112	-0.09308
0.93491	0.93268	0.00251	0.20877	0.93491	0.93213	0.00312	0.26037	0.93491	0.93246	0.00275	0.22942	0.93491	0.93362	0.00145	0.12088	0.93491	0.93586	-0.00108	-0.08967
0.93475	0.9323	0.00276	0.2297	0.93475	0.93219	0.00288	0.24007	0.93475	0.93225	0.00281	0.23415	0.93475	0.93351	0.0014	0.11683	0.93475	0.93566	-0.00102	-0.08469
0.9346	0.93238	0.0025	0.20833	0.9346	0.93205	0.00286	0.23852	0.9346	0.93231	0.00257	0.21434	0.9346	0.9335	0.00123	0.10269	0.9346	0.93538	-0.000873413	-0.07278
0.93445	0.93201	0.00274	0.22812	0.93445	0.9317	0.00309	0.25757	0.93445	0.93188	0.00288	0.2404	0.93445	0.93349	0.00107	0.08947	0.93445	0.93523	-0.000873718	-0.07281
0.9343	0.93205	0.00253	0.21065	0.9343	0.93151	0.00313	0.26077	0.9343	0.93194	0.00265	0.22082	0.9343	0.93333	0.00108	0.09008	0.9343	0.935	-0.000796509	-0.06638
0.93414	0.93175	0.00269	0.22425	0.93414	0.93154	0.00293	0.24386	0.93414	0.93179	0.00264	0.22006	0.93414	0.93307	0.0012	0.10005	0.93414	0.93491	-0.000857849	-0.07149
0.93399	0.93171	0.00257	0.21388	0.93399	0.93146	0.00285	0.23715	0.93399	0.93145	0.00286	0.23796	0.93399	0.9328	0.00133	0.11116	0.93399	0.93475	-0.000856018	-0.07133
0.93384	0.93147	0.00266	0.22163	0.93384	0.93115	0.00302	0.25164	0.93384	0.9316	0.00252	0.2096	0.93384	0.93262	0.00136	0.11373	0.93384	0.93472	-0.000996704	-0.08306
0.93369	0.93138	0.0026	0.21632	0.93369	0.93088	0.00315	0.26276	0.93369	0.93122	0.00277	0.23043	0.93369	0.93254	0.00129	0.10709	0.93369	0.9346	-0.00103	-0.08611
0.93353	0.93121	0.00261	0.21764	0.93353	0.93087	0.00299	0.2493	0.93353	0.93109	0.00274	0.22842	0.93353	0.9325	0.00116	0.09631	0.93353	0.9345	-0.00108	-0.09028
0.93338	0.93102	0.00265	0.22059	0.93338	0.93087	0.00282	0.23529	0.93338	0.93113	0.00253	0.21095	0.93338	0.9324	0.0011	0.09181	0.93338	0.93443	-0.00118	-0.09832
0.93323	0.93095	0.00256	0.21357	0.93323	0.93059	0.00296	0.24658	0.93323	0.93067	0.00287	0.23936	0.93323	0.93224	0.0011	0.09201	0.93323	0.93424	-0.00113	-0.09455
0.93307	0.93069	0.00268	0.22359	0.93307	0.93028	0.00314	0.26166	0.93307	0.93076	0.0026	0.21688	0.93307	0.93193	0.00129	0.10755	0.93307	0.93415	-0.00121	-0.10068
0.93292	0.93067	0.00253	0.21047	0.93292	0.93023	0.00302	0.25205	0.93292	0.93055	0.00266	0.22181	0.93292	0.93163	0.00145	0.1209	0.93292	0.93395	-0.00115	-0.09616
0.93277	0.93035	0.00271	0.22619	0.93277	0.93024	0.00284	0.23689	0.93277	0.93025	0.00284	0.23633	0.93277	0.93157	0.00135	0.11256	0.93277	0.93376	-0.00111	-0.09244
0.93262	0.9304	0.00249	0.20785	0.93262	0.93003	0.00291	0.24223	0.93262	0.93037	0.00253	0.21049	0.93262	0.93153	0.00122	0.10198	0.93262	0.93347	-0.000960083	-0.08001
0.93246	0.93003	0.00274	0.22825	0.93246	0.9297	0.00311	0.2593	0.93246	0.92999	0.00278	0.23186	0.93246	0.93151	0.00108	0.08962	0.93246	0.93332	-0.000963135	-0.08026
0.93231	0.93011	0.00248	0.2063	0.93231	0.92956	0.0031	0.258	0.93231	0.92992	0.00269	0.22441	0.93231	0.9314	0.00102	0.08507	0.93231	0.93303	-0.000809326	-0.06744
0.93216	0.92972	0.00274	0.22855	0.93216	0.92961	0.00286	0.2386	0.93216	0.92988	0.00256	0.21311	0.93216	0.93112	0.00117	0.09717	0.93216	0.93301	-0.000950623	-0.07922
0.93201	0.9298	0.00248	0.20678	0.93201	0.92948	0.00284	0.23682	0.93201	0.92951	0.00281	0.23387	0.93201	0.93089	0.00125	0.10437	0.93201	0.93282	-0.000914612	-0.07622
0.93185	0.92942	0.00273	0.22781	0.93185	0.92912	0.00307	0.25564	0.93185	0.92958	0.00256	0.21339	0.93185	0.9307	0.0013	0.10824	0.93185	0.93279	-0.00105	-0.08723
0.9317	0.92949	0.00248	0.20678	0.9317	0.92894	0.0031	0.25866	0.9317	0.9293	0.0027	0.2253	0.9317	0.93057	0.00127	0.10597	0.9317	0.93267	-0.00109	-0.09092
0.93155	0.92913	0.00271	0.22608	0.93155	0.92897	0.00289	0.24122	0.93155	0.92908	0.00277	0.23084	0.93155	0.93058	0.00108	0.09041	0.93155	0.93259	-0.00117	-0.09712
0.9314	0.92916	0.00252	0.20971	0.9314	0.92888	0.00283	0.23547	0.9314	0.92915	0.00253	0.21057	0.9314	0.93051	0.000991516	0.08263	0.9314	0.93249	-0.00123	-0.10254
0.93124	0.92887	0.00266	0.22184	0.93124	0.92857	0.003	0.25032	0.93124	0.92872	0.00283	0.23598	0.93124	0.93033	0.00103	0.08583	0.93124	0.93233	-0.00122	-0.10129
0.93109	0.92882	0.00255	0.21245	0.93109	0.92831	0.00312	0.26029	0.93109	0.92876	0.00261	0.21784	0.93109	0.93003	0.00119	0.09903	0.93109	0.93225	-0.00131	-0.10885
0.93094	0.9286	0.00263	0.21935	0.93094	0.9283	0.00296	0.24704	0.93094	0.92863	0.0026	0.21629	0.93094	0.92974	0.00135	0.1123	0.93094	0.93202	-0.00122	-0.1016
0.93079	0.92849	0.00258	0.2152	0.93079	0.9283	0.0028	0.23308	0.93079	0.92829	0.0028	0.23371	0.93079	0.92961	0.00133	0.11058	0.93079	0.93182	-0.00116	-0.09689
0.93063	0.92834	0.00257	0.21456	0.93063	0.92802	0.00294	0.24513	0.93063	0.92843	0.00248	0.2065	0.93063	0.92956	0.0012	0.10035	0.93063	0.93157	-0.00105	-0.08764
0.93048	0.92813	0.00264	0.21985	0.93048	0.92771	0.00312	0.25991	0.93048	0.92806	0.00272	0.2269	0.93048	0.92953	0.00106	0.08865	0.93048	0.93143	-0.00107	-0.08893
0.93033	0.92808	0.00253	0.21095	0.93033	0.92766	0.003	0.24971	0.93033	0.92792	0.0027	0.22522	0.93033	0.92941	0.00103	0.08553	0.93033	0.9311	-0.000869751	-0.07248
0.93018	0.9278	0.00267	0.22212	0.93018	0.92767	0.00281	0.2345	0.93018	0.92796	0.00249	0.20765	0.93018	0.92919	0.0011	0.09206	0.93018	0.9311	-0.00104	-0.08634
0.93002	0.92782	0.00247	0.2062	0.93002	0.92748	0.00286	0.23814	0.93002	0.92754	0.00279	0.23252	0.93002	0.92897	0.00118	0.09842	0.93002	0.93095	-0.00104	-0.0867
0.92987	0.92748	0.00269	0.2238	0.92987	0.92715	0.00306	0.25518	0.92987	0.92762	0.00253	0.21113	0.92987	0.92878	0.00123	0.10249	0.92987	0.93087	-0.00112	-0.09349
0.92972	0.92753	0.00246	0.20526	0.92972	0.92701	0.00304	0.25352	0.92972	0.92741	0.00259	0.21612	0.92972	0.92863	0.00123	0.10228	0.92972	0.93077	-0.00118	-0.09822
0.92957	0.92715	0.00271	0.22616	0.92957	0.92706	0.00281	0.23455	0.92957	0.92709	0.00278	0.23135	0.92957	0.92864	0.00104	0.08667	0.92957	0.93071	-0.00129	-0.10763
0.92941	0.92723	0.00245	0.20393	0.92941	0.92692	0.0028	0.23364	0.92941	0.92722	0.00246	0.20526	0.92941	0.92864	0.000870361	0.07253	0.92941	0.9306	-0.00134	-0.11152
0.92926	0.92685	0.00271	0.22583	0.92926	0.92655	0.00305	0.2538	0.92926	0.92684	0.00272	0.22669	0.92926	0.9284	0.000968628	0.08072	0.92926	0.93045	-0.00134	-0.11139
0.92911	0.92692	0.00245	0.20449	0.92911	0.92638	0.00307	0.25566	0.92911	0.92676	0.00264	0.21998	0.92911	0.92813	0.0011	0.09165	0.92911	0.93034	-0.00139	-0.11571
0.92896	0.92655	0.00271	0.22565	0.92896	0.9264	0.00287	0.23877	0.92896	0.92673	0.0025	0.20795	0.92896	0.92785	0.00124	0.10338	0.92896	0.93015	-0.00134	-0.1118
0.9288	0.92661	0.00246	0.20533	0.9288	0.92631	0.0028	0.23331	0.9288	0.92634	0.00276	0.23033	0.9288	0.92766	0.00129	0.10729	0.9288	0.92991	-0.00125	-0.10376
0.92865	0.92627	0.00268	0.22321	0.92865	0.926	0.00298	0.24854	0.92865	0.92641	0.00252	0.21014	0.92865	0.92764	0.00114	0.09483	0.92865	0.9297	-0.00118	-0.09824
0.9285	0.92627	0.0025	0.20856	0.9285	0.92574	0.0031	0.25838	0.9285	0.92615	0.00264	0.21993	0.9285	0.92757	0.00104	0.08698	0.9285	0.92954	-0.00117	-0.09763
0.92834	0.926	0.00263	0.21945	0.92834	0.92574	0.00293	0.24394	0.92834	0.92592	0.00273	0.22728	0.92834	0.92746	0.000994873	0.08291	0.92834	0.92924	-0.001	-0.08349
0.92819	0.92594	0.00253	0.21118	0.92819	0.92573	0.00277	0.23069	0.92819	0.92599	0.00248	0.20663	0.92819	0.92729	0.00102	0.08486	0.92819	0.92919	-0.00112	-0.09359
0.92804	0.92572	0.0026	0.21683	0.92804	0.92545	0.00291	0.24284	0.92804	0.92557	0.00277	0.23084	0.92804	0.92697	0.0012	0.10025	0.92804	0.92903	-0.00111	-0.09272
0.92789	0.92559	0.00258	0.21461	0.92789	0.92513	0.0031	0.258	0.92789	0.9256	0.00256	0.2137	0.92789	0.92675	0.00128	0.10663	0.92789	0.92891	-0.00115	-0.09572
0.92773	0.92547	0.00254	0.21179	0.92773	0.92509	0.00297	0.24719	0.92773	0.92547	0.00254	0.21166	0.92773	0.92664	0.00123	0.10277	0.92773	0.92882	-0.00121	-0.10122
0.92758	0.92525	0.00262	0.21858	0.92758	0.9251	0.00279	0.23242	0.92758	0.92513	0.00275	0.22952	0.92758	0.92663	0.00107	0.08921	0.92758	0.9288	-0.00136	-0.11363
0.92743	0.9252	0.00251	0.20882	0.92743	0.92488	0.00287	0.239	0.92743	0.92527	0.00243	0.20226	0.92743	0.92662	0.000908813	0.07573	0.92743	0.92867	-0.00139	-0.11571
0.92728	0.92491	0.00266	0.22158	0.92728	0.92455	0.00306	0.25523	0.92728	0.92489	0.00268	0.22319	0.92728	0.92645	0.000925598	0.07713	0.92728	0.92856	-0.00145	-0.12047
0.92712	0.92493	0.00247	0.20587	0.92712	0.92443	0.00303	0.25213	0.92712	0.92476	0.00266	0.22176	0.92712	0.92619	0.00104	0.08708	0.92712	0.92839	-0.00142	-0.11823
0.92697	0.92459	0.00268	0.22324	0.92697	0.92448	0.0028	0.23348	0.92697	0.92479	0.00245	0.20432	0.92697	0.92591	0.00119	0.09939	0.92697	0.92824	-0.00142	-0.11854
0.92682	0.92465	0.00244	0.20335	0.92682	0.92433	0.00279	0.23272	0.92682	0.92434	0.00278	0.23201	0.92682	0.92573	0.00122	0.10188	0.92682	0.92796	-0.00129	-0.10724
0.92667	0.92427	0.0027	0.22466	0.92667	0.92397	0.00303	0.25274	0.92667	0.92442	0.00253	0.2107	0.92667	0.92567	0.00111	0.09282	0.92667	0.92778	-0.00125	-0.10442
0.92651	0.92435	0.00243	0.20292	0.92651	0.92379	0.00306	0.2549	0.92651	0.92423	0.00256	0.21367	0.92651	0.92562	0.00101	0.08392	0.92651	0.92762	-0.00124	-0.10315
0.92636	0.92397	0.00269	0.22418	0.92636	0.92384	0.00284	0.23649	0.92636	0.9239	0.00276	0.22998	0.92636	0.92551	0.000960083	0.08001	0.92636	0.92735	-0.00111	-0.0927
0.92621	0.92404	0.00244	0.20302	0.92621	0.92374	0.00278	0.23127	0.92621	0.92404	0.00243	0.20271	0.92621	0.92536	0.000958557	0.07988	0.92621	0.92726	-0.00118	-0.09829
0.92606	0.92367	0.00269	0.22377	0.92606	0.92341	0.00297	0.2475	0.92606	0.92367	0.00268	0.22372	0.92606	0.92503	0.00115	0.09572	0.92606	0.92707	-0.00113	-0.09455
0.9259	0.92372	0.00245	0.20406	0.9259	0.92317	0.00307	0.25586	0.9259	0.92358	0.00261	0.2179	0.9259	0.92474	0.00131	0.10907	0.9259	0.92696	-0.00119	-0.09911
0.92575	0.9234	0.00265	0.22057	0.92575	0.92317	0.0029	0.24157	0.92575	0.92355	0.00247	0.20566	0.92575	0.92467	0.00121	0.10076	0.92575	0.92686	-0.00125	-0.10424
0.9256	0.92338	0.00249	0.20762	0.9256	0.92316	0.00274	0.22845	0.9256	0.92316	0.00274	0.22825	0.9256	0.92465	0.00107	0.08896	0.9256	0.92686	-0.00142	-0.11805
0.92545	0.92312	0.00261	0.21756	0.92545	0.92287	0.0029	0.24157	0.92545	0.92322	0.0025	0.20831	0.92545	0.92462	0.000925903	0.07716	0.92545	0.9267	-0.00141	-0.11775
0.92529	0.92305	0.00252	0.20971	0.92529	0.92256	0.00307	0.2562	0.92529	0.92298	0.0026	0.2165	0.92529	0.92451	0.000875244	0.07294	0.92529	0.92668	-0.00156	-0.13026
0.92514	0.92285	0.00257	0.21446	0.92514	0.92252	0.00294	0.24516	0.92514	0.92273	0.0027	0.22535	0.92514	0.92423	0.00102	0.08486	0.92514	0.92643	-0.00145	-0.12057
0.92499	0.9227	0.00257	0.21403	0.92499	0.92254	0.00276	0.22964	0.92499	0.92281	0.00245	0.20437	0.92499	0.924	0.00111	0.09265	0.92499	0.92631	-0.00149	-0.12383
0.92484	0.9226	0.00251	0.20953	0.92484	0.9223	0.00285	0.23766	0.92484	0.92241	0.00273	0.2271	0.92484	0.9238	0.00116	0.09664	0.92484	0.92604	-0.00135	-0.11248
0.92468	0.92236	0.00261	0.21731	0.92468	0.92198	0.00303	0.25284	0.92468	0.92242	0.00254	0.21156	0.92468	0.92368	0.00112	0.09369	0.92468	0.92586	-0.00133	-0.11065
0.92453	0.92232	0.00248	0.20673	0.92453	0.92187	0.00299	0.249	0.92453	0.92231	0.0025	0.20803	0.92453	0.9237	0.000935059	0.07792	0.92453	0.92566	-0.00127	-0.10605
0.92438	0.92203	0.00264	0.2199	0.92438	0.92191	0.00278	0.23127	0.92438	0.92196	0.00272	0.22669	0.92438	0.92361	0.000861511	0.07179	0.92438	0.92545	-0.0012	-0.10015
0.92422	0.92205	0.00245	0.20391	0.92422	0.92176	0.00277	0.23107	0.92422	0.92209	0.0024	0.19958	0.92422	0.92344	0.000884399	0.0737	0.92422	0.92532	-0.00123	-0.10274
0.92407	0.9217	0.00267	0.22219	0.92407	0.92139	0.00301	0.25085	0.92407	0.92173	0.00264	0.21975	0.92407	0.92314	0.00104	0.08708	0.92407	0.9251	-0.00115	-0.09585
0.92392	0.92177	0.00241	0.20106	0.92392	0.92122	0.00303	0.25243	0.92392	0.92157	0.00264	0.21962	0.92392	0.92284	0.00121	0.10101	0.92392	0.92503	-0.00124	-0.10351
0.92377	0.92138	0.00268	0.22341	0.92377	0.92127	0.00281	0.23382	0.92377	0.92162	0.00242	0.20131	0.92377	0.92272	0.00118	0.09816	0.92377	0.92493	-0.00131	-0.10905
0.92361	0.92147	0.00241	0.20121	0.92361	0.92116	0.00276	0.22964	0.92361	0.92117	0.00275	0.22916	0.92361	0.92267	0.00106	0.08835	0.92361	0.9249	-0.00145	-0.12042
0.92346	0.92109	0.00267	0.22252	0.92346	0.92083	0.00295	0.24597	0.92346	0.92125	0.00249	0.20719	0.92346	0.92266	0.000899048	0.07492	0.92346	0.92474	-0.00144	-0.11998
0.92331	0.92116	0.00241	0.20121	0.92331	0.9206	0.00304	0.25342	0.92331	0.92106	0.00252	0.21032	0.92331	0.92254	0.000867004	0.07225	0.92331	0.92476	-0.00163	-0.13618
0.92316	0.92079	0.00266	0.22148	0.92316	0.92061	0.00286	0.23867	0.92316	0.92073	0.00272	0.22692	0.92316	0.92229	0.000970459	0.08087	0.92316	0.92447	-0.00148	-0.12304
0.923	0.92083	0.00244	0.20335	0.923	0.92058	0.00272	0.227	0.923	0.92088	0.00239	0.19925	0.923	0.92205	0.00107	0.08942	0.923	0.92435	-0.00152	-0.12642
0.92285	0.92052	0.00262	0.21807	0.92285	0.92029	0.00288	0.23979	0.92285	0.9205	0.00265	0.22046	0.92285	0.92185	0.00112	0.09356	0.92285	0.92413	-0.00144	-0.11965
0.9227	0.92049	0.00248	0.20638	0.9227	0.91998	0.00305	0.25444	0.9227	0.9204	0.00258	0.21497	0.9227	0.92171	0.00111	0.0928	0.9227	0.92393	-0.00138	-0.11518
0.92255	0.92025	0.00258	0.2151	0.92255	0.91996	0.00291	0.24259	0.92255	0.92039	0.00242	0.20144	0.92255	0.92172	0.000925598	0.07713	0.92255	0.9237	-0.00129	-0.10788
0.92239	0.92017	0.0025	0.20856	0.92239	0.91997	0.00273	0.22738	0.92239	0.91998	0.00271	0.22565	0.92239	0.92171	0.000767517	0.06396	0.92239	0.9235	-0.00124	-0.10371
0.92224	0.91998	0.00254	0.21174	0.92224	0.91972	0.00283	0.23572	0.92224	0.92005	0.00246	0.20508	0.92224	0.92149	0.000849304	0.07078	0.92224	0.92336	-0.00126	-0.10506
0.92209	0.91982	0.00255	0.21281	0.92209	0.9194	0.00302	0.25141	0.92209	0.91982	0.00255	0.2124	0.92209	0.92121	0.000992432	0.0827	0.92209	0.92316	-0.00121	-0.10073
0.92194	0.91972	0.00249	0.20737	0.92194	0.91931	0.00295	0.2462	0.92194	0.91957	0.00266	0.22196	0.92194	0.92093	0.00113	0.09407	0.92194	0.92306	-0.00127	-0.10559
0.92178	0.91948	0.00259	0.21601	0.92178	0.91933	0.00275	0.22926	0.92178	0.91964	0.00241	0.20098	0.92178	0.92074	0.00117	0.09773	0.92178	0.923	-0.00137	-0.11393
0.92163	0.91945	0.00245	0.20434	0.92163	0.91918	0.00276	0.22964	0.92163	0.91925	0.00268	0.22298	0.92163	0.92073	0.00102	0.08474	0.92163	0.92292	-0.00145	-0.12082
0.92148	0.91914	0.00263	0.21894	0.92148	0.91881	0.003	0.24963	0.92148	0.91925	0.00251	0.20905	0.92148	0.92067	0.00091217	0.07601	0.92148	0.92278	-0.00146	-0.12166
0.92133	0.91917	0.00242	0.20164	0.92133	0.91865	0.00301	0.2507	0.92133	0.91914	0.00245	0.20437	0.92133	0.92055	0.000875549	0.07296	0.92133	0.9228	-0.00166	-0.13799
0.92117	0.91881	0.00265	0.22097	0.92117	0.9187	0.00278	0.23137	0.92117	0.91879	0.00268	0.22326	0.92117	0.92037	0.000904236	0.07535	0.92117	0.92252	-0.00152	-0.1265
0.92102	0.91889	0.0024	0.19964	0.92102	0.91859	0.00273	0.22756	0.92102	0.91892	0.00236	0.19658	0.92102	0.92007	0.00107	0.08926	0.92102	0.9224	-0.00155	-0.12876
0.92087	0.9185	0.00266	0.2213	0.92087	0.91825	0.00294	0.24483	0.92087	0.91855	0.0026	0.21662	0.92087	0.91985	0.00114	0.09514	0.92087	0.92222	-0.00151	-0.12616
0.92072	0.91859	0.00239	0.19938	0.92072	0.91803	0.00301	0.25119	0.92072	0.91841	0.0026	0.21629	0.92072	0.91973	0.00111	0.09249	0.92072	0.92201	-0.00146	-0.12149
0.92056	0.9182	0.00265	0.221	0.92056	0.91804	0.00283	0.23608	0.92056	0.91844	0.00239	0.19887	0.92056	0.91972	0.000947876	0.07899	0.92056	0.92174	-0.00132	-0.11004
0.92041	0.91828	0.0024	0.19971	0.92041	0.91801	0.0027	0.22497	0.92041	0.918	0.00271	0.22568	0.92041	0.91972	0.000772705	0.06439	0.92041	0.92158	-0.00131	-0.10923
0.92026	0.91789	0.00266	0.22128	0.92026	0.91769	0.00289	0.24083	0.92026	0.91804	0.00249	0.20765	0.92026	0.9195	0.000846252	0.07052	0.92026	0.92136	-0.00123	-0.10287
0.9201	0.91794	0.00244	0.20302	0.9201	0.9174	0.00304	0.25347	0.9201	0.91787	0.00251	0.2092	0.9201	0.91925	0.000964966	0.08041	0.9201	0.92122	-0.00125	-0.10414
0.91995	0.91764	0.0026	0.21645	0.91995	0.91737	0.0029	0.24147	0.91995	0.91754	0.00271	0.22573	0.91995	0.91896	0.00111	0.0927	0.91995	0.92108	-0.00126	-0.10529
0.9198	0.91761	0.00246	0.20523	0.9198	0.91739	0.00271	0.22583	0.9198	0.91769	0.00237	0.19714	0.9198	0.9188	0.00113	0.09397	0.9198	0.92104	-0.0014	-0.11642
0.91965	0.91737	0.00256	0.21334	0.91965	0.91713	0.00282	0.23529	0.91965	0.91731	0.00262	0.2184	0.91965	0.91874	0.00102	0.08458	0.91965	0.92094	-0.00145	-0.12067
0.91949	0.91727	0.0025	0.20793	0.91949	0.91682	0.003	0.25004	0.91949	0.91722	0.00256	0.21314	0.91949	0.91868	0.000910034	0.07584	0.91949	0.92081	-0.00148	-0.12339
0.91934	0.91711	0.00251	0.20897	0.91934	0.91674	0.00293	0.24409	0.91934	0.91722	0.00239	0.19903	0.91934	0.91858	0.000861816	0.07182	0.91934	0.92078	-0.00162	-0.13494
0.91919	0.91693	0.00254	0.21197	0.91919	0.91676	0.00273	0.22715	0.91919	0.91681	0.00268	0.22303	0.91919	0.91842	0.000867004	0.07225	0.91919	0.92056	-0.00154	-0.1285
0.91904	0.91684	0.00247	0.20543	0.91904	0.91659	0.00275	0.22911	0.91904	0.91687	0.00243	0.20284	0.91904	0.91811	0.00104	0.08682	0.91904	0.92045	-0.00159	-0.13278
0.91888	0.91659	0.00258	0.21495	0.91888	0.91624	0.00297	0.24737	0.91888	0.91665	0.00251	0.20953	0.91888	0.91782	0.0012	0.09987	0.91888	0.92026	-0.00154	-0.12835
0.91873	0.91658	0.00242	0.20172	0.91873	0.91607	0.00299	0.24902	0.91873	0.91638	0.00264	0.22029	0.91873	0.91775	0.0011	0.09181	0.91873	0.92007	-0.0015	-0.12535
0.91858	0.91626	0.00261	0.21749	0.91858	0.91613	0.00275	0.22893	0.91858	0.91646	0.00238	0.19844	0.91858	0.91773	0.000956421	0.0797	0.91858	0.91977	-0.00134	-0.11157
0.91843	0.9163	0.00239	0.19908	0.91843	0.91601	0.00271	0.22608	0.91843	0.91609	0.00263	0.21919	0.91843	0.9177	0.000812073	0.06767	0.91843	0.91963	-0.00135	-0.11271
0.91827	0.91593	0.00263	0.21957	0.91827	0.91568	0.00292	0.24333	0.91827	0.91607	0.00247	0.20592	0.91827	0.9176	0.000756836	0.06307	0.91827	0.91938	-0.00124	-0.1032
0.91812	0.91601	0.00237	0.19753	0.91812	0.91546	0.00299	0.24907	0.91812	0.91597	0.00241	0.20111	0.91812	0.91732	0.000897217	0.07477	0.91812	0.91932	-0.00134	-0.11195
0.91797	0.91562	0.00263	0.21957	0.91797	0.91548	0.00279	0.23287	0.91797	0.91562	0.00264	0.22039	0.91797	0.91708	0.000996094	0.08301	0.91797	0.91915	-0.00133	-0.11052
0.91782	0.9157	0.00238	0.19811	0.91782	0.91543	0.00269	0.22387	0.91782	0.91574	0.00233	0.19419	0.91782	0.91689	0.00104	0.08708	0.91782	0.91911	-0.00146	-0.12149
0.91766	0.91533	0.00263	0.21894	0.91766	0.91513	0.00284	0.23684	0.91766	0.91539	0.00256	0.21317	0.91766	0.91677	0.001	0.08369	0.91766	0.919	-0.0015	-0.1252
0.91751	0.91539	0.00238	0.19814	0.91751	0.91483	0.00301	0.25063	0.91751	0.91522	0.00257	0.21416	0.91751	0.91678	0.000821533	0.06846	0.91751	0.9189	-0.00156	-0.12962
0.91736	0.91504	0.00261	0.21716	0.91736	0.91482	0.00286	0.23814	0.91736	0.91527	0.00235	0.19547	0.91736	0.91668	0.000762329	0.06353	0.91736	0.91882	-0.00164	-0.13654
0.91721	0.91506	0.00241	0.20081	0.91721	0.91483	0.00267	0.22209	0.91721	0.91482	0.00268	0.22341	0.91721	0.91651	0.000783081	0.06526	0.91721	0.91864	-0.00161	-0.1344
0.91705	0.91477	0.00256	0.2135	0.91705	0.91457	0.00279	0.23277	0.91705	0.9149	0.00242	0.20177	0.91705	0.91621	0.000942383	0.07853	0.91705	0.91856	-0.00169	-0.14071
0.9169	0.91473	0.00244	0.20363	0.9169	0.91425	0.00298	0.24798	0.9169	0.91473	0.00244	0.20332	0.9169	0.91591	0.00111	0.09277	0.9169	0.91835	-0.00163	-0.13557
0.91675	0.9145	0.00253	0.21055	0.91675	0.91418	0.00289	0.24078	0.91675	0.91438	0.00266	0.22146	0.91675	0.91581	0.00105	0.08792	0.91675	0.91815	-0.00158	-0.13171
0.9166	0.91439	0.00248	0.2066	0.9166	0.9142	0.00269	0.22456	0.9166	0.91454	0.00231	0.19274	0.9166	0.91576	0.000940857	0.0784	0.9166	0.91788	-0.00144	-0.12037
0.91644	0.91424	0.00248	0.20635	0.91644	0.91402	0.00272	0.22708	0.91644	0.91416	0.00257	0.21403	0.91644	0.91575	0.000780945	0.06508	0.91644	0.91774	-0.00145	-0.12108
0.91629	0.91404	0.00253	0.21085	0.91629	0.91366	0.00295	0.24595	0.91629	0.91406	0.00251	0.20902	0.91629	0.91562	0.000752563	0.06271	0.91629	0.91742	-0.00127	-0.10605
0.91614	0.91397	0.00243	0.20269	0.91614	0.9135	0.00296	0.24656	0.91614	0.91406	0.00233	0.19445	0.91614	0.91537	0.000861816	0.07182	0.91614	0.9174	-0.00142	-0.11848
0.91599	0.9137	0.00257	0.21383	0.91599	0.91356	0.00272	0.22669	0.91599	0.91364	0.00264	0.21993	0.91599	0.91514	0.000951538	0.07929	0.91599	0.91723	-0.0014	-0.11627
0.91583	0.9137	0.0024	0.19979	0.91583	0.91344	0.00269	0.22395	0.91583	0.91371	0.00239	0.19877	0.91583	0.91494	0.001	0.08349	0.91583	0.91717	-0.0015	-0.12522
0.91568	0.91337	0.00259	0.21591	0.91568	0.9131	0.0029	0.24178	0.91568	0.91349	0.00247	0.20543	0.91568	0.9148	0.000990601	0.08255	0.91568	0.91706	-0.00155	-0.12906
0.91553	0.91342	0.00236	0.19702	0.91553	0.9129	0.00296	0.24625	0.91553	0.91322	0.0026	0.2165	0.91553	0.91483	0.000785828	0.06549	0.91553	0.91699	-0.00164	-0.13705
0.91537	0.91305	0.00262	0.21797	0.91537	0.91291	0.00277	0.23053	0.91537	0.91329	0.00234	0.1948	0.91537	0.9148	0.000644531	0.05371	0.91537	0.91689	-0.0017	-0.14183
0.91522	0.91313	0.00235	0.19577	0.91522	0.91285	0.00266	0.22168	0.91522	0.91293	0.00258	0.21492	0.91522	0.91458	0.000721741	0.06015	0.91522	0.91673	-0.00169	-0.14086
0.91507	0.91275	0.00261	0.21723	0.91507	0.91256	0.00282	0.23514	0.91507	0.91289	0.00245	0.20383	0.91507	0.9143	0.000868835	0.0724	0.91507	0.91665	-0.00177	-0.14755
0.91492	0.91282	0.00235	0.19608	0.91492	0.91227	0.00298	0.24801	0.91492	0.91281	0.00236	0.19686	0.91492	0.91402	0.00101	0.08392	0.91492	0.91643	-0.0017	-0.14135
0.91476	0.91244	0.00261	0.21718	0.91476	0.91225	0.00283	0.23544	0.91476	0.91244	0.00261	0.21734	0.91476	0.91383	0.00104	0.08703	0.91476	0.91621	-0.00163	-0.13568
0.91461	0.91251	0.00236	0.19636	0.91461	0.91226	0.00264	0.22034	0.91461	0.91256	0.0023	0.19196	0.91461	0.91381	0.000901184	0.0751	0.91461	0.91598	-0.00154	-0.12817
0.91446	0.91216	0.00258	0.21502	0.91446	0.91198	0.00278	0.23193	0.91446	0.91222	0.00252	0.20981	0.91446	0.91376	0.000789795	0.06582	0.91446	0.91583	-0.00154	-0.12822
0.91431	0.91217	0.0024	0.20014	0.91431	0.91167	0.00296	0.24661	0.91431	0.91205	0.00253	0.21088	0.91431	0.91364	0.000746155	0.06218	0.91431	0.9155	-0.00134	-0.11205
0.91415	0.9119	0.00253	0.21123	0.91415	0.9116	0.00287	0.23877	0.91415	0.9121	0.00231	0.19244	0.91415	0.91345	0.0007901	0.06584	0.91415	0.91549	-0.0015	-0.12492
0.914	0.91184	0.00243	0.20246	0.914	0.91163	0.00267	0.22245	0.914	0.91165	0.00264	0.21983	0.914	0.91315	0.000954285	0.07952	0.914	0.91532	-0.00148	-0.12327
0.91385	0.91162	0.0025	0.20864	0.91385	0.91143	0.00272	0.22652	0.91385	0.91172	0.00239	0.1991	0.91385	0.91295	0.00101	0.0838	0.91385	0.91521	-0.00153	-0.12789
0.9137	0.9115	0.00247	0.20582	0.9137	0.91109	0.00293	0.24389	0.9137	0.91157	0.00239	0.19928	0.9137	0.91282	0.000989075	0.08242	0.9137	0.91512	-0.0016	-0.13306
0.91354	0.91137	0.00245	0.20398	0.91354	0.91094	0.00293	0.24419	0.91354	0.91122	0.00261	0.21749	0.91354	0.91282	0.000812378	0.0677	0.91354	0.91508	-0.00173	-0.14379
0.91339	0.91115	0.00252	0.20991	0.91339	0.911	0.00269	0.22415	0.91339	0.91137	0.00227	0.18949	0.91339	0.91282	0.000638428	0.0532	0.91339	0.91497	-0.00177	-0.14763
0.91324	0.9111	0.00241	0.20042	0.91324	0.91087	0.00266	0.22161	0.91324	0.91098	0.00253	0.21108	0.91324	0.91263	0.000685425	0.05712	0.91324	0.91482	-0.00178	-0.14849
0.91309	0.91081	0.00255	0.21266	0.91309	0.91052	0.00288	0.23997	0.91309	0.91088	0.00248	0.20668	0.91309	0.91238	0.000798035	0.0665	0.91309	0.9147	-0.00181	-0.15116
0.91293	0.91085	0.00235	0.19552	0.91293	0.91035	0.0029	0.24208	0.91293	0.91092	0.00226	0.18819	0.91293	0.91212	0.000918274	0.07652	0.91293	0.91456	-0.00183	-0.15226
0.91278	0.9105	0.00256	0.2137	0.91278	0.91037	0.00271	0.22591	0.91278	0.91048	0.00258	0.2151	0.91278	0.91193	0.000956116	0.07968	0.91278	0.9143	-0.00171	-0.14247
0.91263	0.91055	0.00233	0.19437	0.91263	0.91029	0.00263	0.21907	0.91263	0.91056	0.00233	0.19394	0.91263	0.91189	0.00083374	0.06948	0.91263	0.91411	-0.00166	-0.13842
0.91248	0.91017	0.00259	0.21599	0.91248	0.90998	0.0028	0.23338	0.91248	0.91033	0.00241	0.20081	0.91248	0.91182	0.00073761	0.06147	0.91248	0.91394	-0.00164	-0.13674
0.91232	0.91025	0.00233	0.19386	0.91232	0.9097	0.00295	0.24554	0.91232	0.91006	0.00254	0.21207	0.91232	0.9117	0.00069519	0.05793	0.91232	0.91365	-0.00149	-0.12449
0.91217	0.90987	0.00258	0.21538	0.91217	0.90969	0.00279	0.2327	0.91217	0.91014	0.00228	0.19002	0.91217	0.91155	0.000694885	0.05791	0.91217	0.91359	-0.00159	-0.13268
0.91202	0.90994	0.00233	0.1943	0.91202	0.90969	0.00261	0.2179	0.91202	0.90977	0.00252	0.21004	0.91202	0.91123	0.000888672	0.07406	0.91202	0.9134	-0.00156	-0.12973
0.91187	0.90957	0.00258	0.21505	0.91187	0.90941	0.00275	0.22952	0.91187	0.90972	0.00241	0.20042	0.91187	0.91095	0.00103	0.08545	0.91187	0.9133	-0.00161	-0.13407
0.91171	0.90962	0.00235	0.19572	0.91171	0.9091	0.00294	0.24485	0.91171	0.90965	0.00231	0.19272	0.91171	0.91087	0.000949402	0.07912	0.91171	0.9132	-0.00167	-0.13921
0.91156	0.9093	0.00254	0.21192	0.91156	0.90904	0.00283	0.23575	0.91156	0.90928	0.00256	0.21304	0.91156	0.91085	0.000793152	0.0661	0.91156	0.91319	-0.00183	-0.15256
0.91141	0.90928	0.00239	0.19905	0.91141	0.90906	0.00264	0.22006	0.91141	0.90939	0.00227	0.18923	0.91141	0.91083	0.000647583	0.05397	0.91141	0.91304	-0.00184	-0.15333
0.91125	0.90903	0.0025	0.20859	0.91125	0.90885	0.0027	0.22489	0.91125	0.90906	0.00246	0.20526	0.91125	0.91071	0.000608826	0.05074	0.91125	0.91297	-0.00193	-0.16098
0.9111	0.90895	0.00242	0.20137	0.9111	0.90852	0.0029	0.2419	0.9111	0.90889	0.00249	0.20757	0.9111	0.91044	0.000748291	0.06236	0.9111	0.91276	-0.00186	-0.15511
0.91095	0.90875	0.00247	0.20582	0.91095	0.90837	0.0029	0.24134	0.91095	0.90893	0.00227	0.18906	0.91095	0.91019	0.000857239	0.07144	0.91095	0.91263	-0.00189	-0.15745
0.9108	0.9086	0.00247	0.20551	0.9108	0.90843	0.00266	0.22133	0.9108	0.90848	0.0026	0.21657	0.9108	0.91	0.000899658	0.07497	0.9108	0.91236	-0.00175	-0.14605
0.91064	0.9085	0.00241	0.20121	0.91064	0.9083	0.00264	0.21993	0.91064	0.90856	0.00234	0.19511	0.91064	0.90989	0.000847168	0.0706	0.91064	0.91217	-0.00172	-0.1432
0.91049	0.90826	0.00251	0.20902	0.91049	0.90794	0.00287	0.23918	0.91049	0.9084	0.00236	0.19633	0.91049	0.90989	0.000681763	0.05681	0.91049	0.91199	-0.00168	-0.1401
0.91034	0.90823	0.00237	0.1978	0.91034	0.90775	0.00291	0.24218	0.91034	0.90805	0.00257	0.2139	0.91034	0.90979	0.000622559	0.05188	0.91034	0.91176	-0.00159	-0.13278
0.91019	0.90793	0.00254	0.21172	0.91019	0.90778	0.0027	0.22499	0.91019	0.9082	0.00224	0.18636	0.91019	0.90962	0.000632935	0.05274	0.91019	0.91164	-0.00164	-0.13649
0.91003	0.90795	0.00234	0.19485	0.91003	0.9077	0.00262	0.21843	0.91003	0.90782	0.00249	0.20757	0.91003	0.90932	0.00080658	0.06721	0.91003	0.91144	-0.00158	-0.13171
0.90988	0.9076	0.00256	0.21365	0.90988	0.90739	0.0028	0.23351	0.90988	0.9077	0.00245	0.20381	0.90988	0.90901	0.000981445	0.08179	0.90988	0.91135	-0.00165	-0.13751
0.90973	0.90767	0.00232	0.19305	0.90973	0.90712	0.00293	0.24399	0.90973	0.90773	0.00224	0.187	0.90973	0.90892	0.000910645	0.07589	0.90973	0.91124	-0.0017	-0.14186
0.90958	0.90728	0.00258	0.215	0.90958	0.90712	0.00276	0.23028	0.90958	0.90729	0.00257	0.21431	0.90958	0.90887	0.000795593	0.0663	0.90958	0.91123	-0.00186	-0.15462
0.90942	0.90737	0.00231	0.19234	0.90942	0.90711	0.0026	0.2166	0.90942	0.90737	0.00231	0.19244	0.90942	0.90886	0.000632324	0.05269	0.90942	0.91108	-0.00186	-0.15465
0.90927	0.90699	0.00257	0.2139	0.90927	0.90684	0.00274	0.22804	0.90927	0.90715	0.00238	0.19839	0.90927	0.90874	0.000599365	0.04995	0.90927	0.91108	-0.00203	-0.16925
0.90912	0.90706	0.00231	0.19279	0.90912	0.90652	0.00292	0.24343	0.90912	0.90687	0.00253	0.21075	0.90912	0.90848	0.000718384	0.05987	0.90912	0.9108	-0.00189	-0.15739
[truncated: 12,248 more rows]

## Sheet: CV data-mesopoous
Compensated Potential	Current	Current density	Compensated Potential	Current	Current density	Compensated Potential	Current	Current density	Compensated Potential	Current	Current density	Compensated Potential	Current	Current density
[truncated: 13,106 more rows]

[truncated: 9 more sheets: capacitance retention, surface area vs capacitance, BET isotherms, BET PSD, polorisation-mesoporous, polorisation-macroporous, polorisation-hierarchical, polorisation-HISPECS, CV-PtC]
